# Supplementary material for: Iron detection and remediation with a functionalized porous polymer applied to environmental water samples
Source: Royal Society of Chemistry journal article supplement (doi:10.1039/c9sc01441a), 2019-01-01
Supplement: c9sc01441a1.xlsx [file c9sc01441a1.xlsx]

## Sheet: CA_water_Fe_SF
WELL ID	WELL NAME	APPROXIMATE LATITUDE	APPROXIMATE LONGITUDE	CHEMICAL	QUALIFIER	RESULT	UNITS	DATE	DATASET_CAT	DATASET	COUNTY	RB	GW_BASIN_NAME	ASSEMBLY	SENATE
W0602110501	2110501-004	38.046	-122.87	FE		110	UG/L	2015-05-05	WATER SUPPLY (WELLS)	DHS	MARIN	2	NO BASIN FOUND	10	2
W0602110501	2110501-004	38.046	-122.87	FE		170	UG/L	2015-07-07	WATER SUPPLY (WELLS)	DHS	MARIN	2	NO BASIN FOUND	10	2
W0602110501	2110501-004	38.046	-122.87	FE		0	UG/L	2015-11-03	WATER SUPPLY (WELLS)	DHS	MARIN	2	NO BASIN FOUND	10	2
W0602110501	2110501-004	38.046	-122.87	FE		120	UG/L	2016-01-19	WATER SUPPLY (WELLS)	DHS	MARIN	2	NO BASIN FOUND	10	2
W0602110501	2110501-004	38.046	-122.87	FE		110	UG/L	2016-02-09	WATER SUPPLY (WELLS)	DHS	MARIN	2	NO BASIN FOUND	10	2
W0602110006	2110006-001	38.075	-122.791	FE	<	0	UG/L	2014-06-17	WATER SUPPLY (WELLS)	DHS	MARIN	2	NO BASIN FOUND	10	2
W0604110013	4110013-010	37.698	-122.474	FE	<	0	UG/L	2016-02-03	WATER SUPPLY (WELLS)	DHS	SAN MATEO	2	WESTSIDE (2-35)	19	11
W0604110010	4110010-012	37.524	-122.474	FE		190	UG/L	2015-08-17	WATER SUPPLY (WELLS)	DHS	SAN MATEO	2	HALF MOON BAY TERRACE (2-22)	22	13
W0604110010	4110010-014	37.553	-122.514	FE	<	0	UG/L	2015-08-10	WATER SUPPLY (WELLS)	DHS	SAN MATEO	2	NO BASIN FOUND	22	13
W0604110009	4110009-003	37.669	-122.435	FE		7.087	UG/L	2015-01-13	WATER SUPPLY (WELLS)	DHS	SAN MATEO	2	WESTSIDE (2-35)	22	13
W0604900562	4900562-008	38.306	-122.553	FE	<	100	UG/L	2016-06-20	WATER SUPPLY (WELLS)	DHS	SONOMA	2	NO BASIN FOUND	10	3
W0602110501	2110501-003	38.046	-122.87	FE		1100	UG/L	2015-03-10	WATER SUPPLY (WELLS)	DHS	MARIN	2	NO BASIN FOUND	10	2
W0604110009	4110009-003	37.669	-122.435	FE		13.31	UG/L	2015-04-07	WATER SUPPLY (WELLS)	DHS	SAN MATEO	2	WESTSIDE (2-35)	22	13
W0604310011	4310011-136	37.321	-121.959	FE		450	UG/L	2014-01-08	WATER SUPPLY (WELLS)	DHS	SANTA CLARA	2	SANTA CLARA VALLEY - SANTA CLARA (2-9.02)	28	15
W0604300525	4300525-003	37.147	-121.959	FE		1600	UG/L	2015-08-23	WATER SUPPLY (WELLS)	DHS	SANTA CLARA	2	NO BASIN FOUND	28	15
W0604300525	4300525-003	37.147	-121.959	FE		1700	UG/L	2016-02-22	WATER SUPPLY (WELLS)	DHS	SANTA CLARA	2	NO BASIN FOUND	28	15
W0604310011	4310011-115	37.321	-121.88	FE		420	UG/L	2015-05-19	WATER SUPPLY (WELLS)	DHS	SANTA CLARA	2	SANTA CLARA VALLEY - SANTA CLARA (2-9.02)	27	15
W0604310011	4310011-108	37.321	-121.84	FE	<	100	UG/L	2014-06-11	WATER SUPPLY (WELLS)	DHS	SANTA CLARA	2	SANTA CLARA VALLEY - SANTA CLARA (2-9.02)	27	15
W0604310011	4310011-022	37.321	-121.92	FE	<	100	UG/L	2014-06-17	WATER SUPPLY (WELLS)	DHS	SANTA CLARA	2	SANTA CLARA VALLEY - SANTA CLARA (2-9.02)	28	15
W0604310011	4310011-115	37.321	-121.88	FE		180	UG/L	2016-03-11	WATER SUPPLY (WELLS)	DHS	SANTA CLARA	2	SANTA CLARA VALLEY - SANTA CLARA (2-9.02)	27	15
W0604310011	4310011-117	37.321	-121.88	FE		170	UG/L	2016-02-18	WATER SUPPLY (WELLS)	DHS	SANTA CLARA	2	SANTA CLARA VALLEY - SANTA CLARA (2-9.02)	27	15
W0604310011	4310011-028	37.321	-121.92	FE		100	UG/L	2014-07-18	WATER SUPPLY (WELLS)	DHS	SANTA CLARA	2	SANTA CLARA VALLEY - SANTA CLARA (2-9.02)	28	15
W0604310011	4310011-093	37.35	-121.88	FE		870	UG/L	2014-01-13	WATER SUPPLY (WELLS)	DHS	SANTA CLARA	2	SANTA CLARA VALLEY - SANTA CLARA (2-9.02)	27	15
W0604310011	4310011-093	37.35	-121.88	FE		120	UG/L	2014-12-23	WATER SUPPLY (WELLS)	DHS	SANTA CLARA	2	SANTA CLARA VALLEY - SANTA CLARA (2-9.02)	27	15
W0604310011	4310011-093	37.35	-121.88	FE	<	100	UG/L	2015-01-15	WATER SUPPLY (WELLS)	DHS	SANTA CLARA	2	SANTA CLARA VALLEY - SANTA CLARA (2-9.02)	27	15
W0604310011	4310011-089	37.35	-121.88	FE	<	100	UG/L	2014-12-04	WATER SUPPLY (WELLS)	DHS	SANTA CLARA	2	SANTA CLARA VALLEY - SANTA CLARA (2-9.02)	27	15
W0604310011	4310011-093	37.35	-121.88	FE	<	0	UG/L	2016-06-20	WATER SUPPLY (WELLS)	DHS	SANTA CLARA	2	SANTA CLARA VALLEY - SANTA CLARA (2-9.02)	27	15
W0604910006	4910006-009	38.248	-122.633	FE		240	UG/L	2014-09-16	WATER SUPPLY (WELLS)	DHS	SONOMA	2	PETALUMA VALLEY (2-1)	10	3
W0604910006	4910006-009	38.248	-122.633	FE		320	UG/L	2015-06-18	WATER SUPPLY (WELLS)	DHS	SONOMA	2	PETALUMA VALLEY (2-1)	10	3
W0604910012	4910012-006	38.306	-122.474	FE	<	0	UG/L	2014-03-17	WATER SUPPLY (WELLS)	DHS	SONOMA	2	NO BASIN FOUND	10	3
W0604910013	4910013-003	38.306	-122.514	FE	<	0	UG/L	2014-02-12	WATER SUPPLY (WELLS)	DHS	SONOMA	2	NAPA-SONOMA VALLEY - SONOMA VALLEY (2-2.02)	10	3
W0602800035	2800035-001	38.509	-122.435	FE		1400	UG/L	2016-02-26	WATER SUPPLY (WELLS)	DHS	NAPA	2	NO BASIN FOUND	4	3
W0604910022	4910022-001	38.335	-122.672	FE	<	100	UG/L	2016-06-20	WATER SUPPLY (WELLS)	DHS	SONOMA	2	SANTA ROSA VALLEY - SANTA ROSA PLAIN (1-55.01)	4	3
W0600110001	0110001-019	37.553	-121.959	FE	<	100	UG/L	2014-07-21	WATER SUPPLY (WELLS)	DHS	ALAMEDA	2	SANTA CLARA VALLEY - NILES CONE (2-9.01)	20	10
W0600110001	0110001-045	37.553	-122.038	FE		100	UG/L	2015-07-21	WATER SUPPLY (WELLS)	DHS	ALAMEDA	2	SANTA CLARA VALLEY - NILES CONE (2-9.01)	25	10
W0600110001	0110001-019	37.553	-121.959	FE	<	100	UG/L	2016-07-25	WATER SUPPLY (WELLS)	DHS	ALAMEDA	2	SANTA CLARA VALLEY - NILES CONE (2-9.01)	20	10
W0600110001	0110001-011	37.553	-121.999	FE	<	100	UG/L	2016-07-18	WATER SUPPLY (WELLS)	DHS	ALAMEDA	2	SANTA CLARA VALLEY - NILES CONE (2-9.01)	20	10
W0604110020	4110020-004	37.466	-122.157	FE	<	0	UG/L	2015-06-09	WATER SUPPLY (WELLS)	DHS	SAN MATEO	2	SANTA CLARA VALLEY - SAN MATEO PLAIN (2-9.03)	24	13
W0604310001	4310001-035	37.408	-122.118	FE		36.33	UG/L	2014-09-09	WATER SUPPLY (WELLS)	DHS	SANTA CLARA	2	SANTA CLARA VALLEY - SANTA CLARA (2-9.02)	24	13
W0604310001	4310001-035	37.408	-122.118	FE		31.55	UG/L	2015-03-05	WATER SUPPLY (WELLS)	DHS	SANTA CLARA	2	SANTA CLARA VALLEY - SANTA CLARA (2-9.02)	24	13
W0604310001	4310001-035	37.408	-122.118	FE		49.77	UG/L	2015-06-03	WATER SUPPLY (WELLS)	DHS	SANTA CLARA	2	SANTA CLARA VALLEY - SANTA CLARA (2-9.02)	24	13
W0604310011	4310011-060	37.379	-121.88	FE		180	UG/L	2014-04-17	WATER SUPPLY (WELLS)	DHS	SANTA CLARA	2	SANTA CLARA VALLEY - SANTA CLARA (2-9.02)	25	10
W0604310020	4310020-013	37.205	-121.721	FE		620	UG/L	2016-07-19	WATER SUPPLY (WELLS)	DHS	SANTA CLARA	2	SANTA CLARA VALLEY - SANTA CLARA (2-9.02)	29	17
W0604100538	4100538-005	37.292	-122.276	FE		710	UG/L	2014-03-12	WATER SUPPLY (WELLS)	DHS	SAN MATEO	2	NO BASIN FOUND	24	13
W0602000573	2000573-001	38.248	-122.95	FE		1000	UG/L	2016-03-15	WATER SUPPLY (WELLS)	DHS	MARIN	2	NO BASIN FOUND	10	2
W0602801008	2801008-002	38.277	-122.355	FE		130	UG/L	2014-03-05	WATER SUPPLY (WELLS)	DHS	NAPA	2	NO BASIN FOUND	4	3
W0602801008	2801008-002	38.277	-122.355	FE	<	0	UG/L	2016-04-05	WATER SUPPLY (WELLS)	DHS	NAPA	2	NO BASIN FOUND	4	3
W0602100565	2100565-001	37.872	-122.553	FE		130	UG/L	2014-07-08	WATER SUPPLY (WELLS)	DHS	MARIN	2	NO BASIN FOUND	10	2
W0604910012	4910012-004	38.306	-122.435	FE	<	0	UG/L	2014-03-17	WATER SUPPLY (WELLS)	DHS	SONOMA	2	NO BASIN FOUND	10	3
W0604910012	4910012-002	38.306	-122.474	FE	<	0	UG/L	2016-03-29	WATER SUPPLY (WELLS)	DHS	SONOMA	2	NO BASIN FOUND	10	3
W0604310019	4310019-005	37.408	-121.92	FE		110	UG/L	2014-05-20	WATER SUPPLY (WELLS)	DHS	SANTA CLARA	2	SANTA CLARA VALLEY - SANTA CLARA (2-9.02)	25	10
W0604310019	4310019-005	37.408	-121.92	FE		150	UG/L	2014-08-12	WATER SUPPLY (WELLS)	DHS	SANTA CLARA	2	SANTA CLARA VALLEY - SANTA CLARA (2-9.02)	25	10
W0604310019	4310019-005	37.408	-121.92	FE		110	UG/L	2016-05-10	WATER SUPPLY (WELLS)	DHS	SANTA CLARA	2	SANTA CLARA VALLEY - SANTA CLARA (2-9.02)	25	10
W0600110010	0110010-017	37.698	-121.84	FE		0	UG/L	2015-11-23	WATER SUPPLY (WELLS)	DHS	ALAMEDA	2	LIVERMORE VALLEY (2-10)	16	7
W0604901080	4901080-009	38.161	-122.474	FE		320	UG/L	2014-05-19	WATER SUPPLY (WELLS)	DHS	SONOMA	2	PETALUMA VALLEY (2-1)	10	3
W0604110028	4110028-002	37.524	-122.514	FE		4500	UG/L	2014-01-20	WATER SUPPLY (WELLS)	DHS	SAN MATEO	2	HALF MOON BAY TERRACE (2-22)	22	13
W0604110028	4110028-002	37.524	-122.514	FE		4000	UG/L	2015-01-19	WATER SUPPLY (WELLS)	DHS	SAN MATEO	2	HALF MOON BAY TERRACE (2-22)	22	13
W0604110028	4110028-002	37.524	-122.514	FE		4600	UG/L	2015-07-20	WATER SUPPLY (WELLS)	DHS	SAN MATEO	2	HALF MOON BAY TERRACE (2-22)	22	13
W0604110028	4110028-002	37.524	-122.514	FE		8300	UG/L	2016-05-18	WATER SUPPLY (WELLS)	DHS	SAN MATEO	2	HALF MOON BAY TERRACE (2-22)	22	13
W0604110009	4110009-006	37.669	-122.435	FE		0.673	UG/L	2015-06-01	WATER SUPPLY (WELLS)	DHS	SAN MATEO	2	WESTSIDE (2-35)	22	13
W0604310011	4310011-111	37.321	-121.88	FE	<	0	UG/L	2015-09-02	WATER SUPPLY (WELLS)	DHS	SANTA CLARA	2	SANTA CLARA VALLEY - SANTA CLARA (2-9.02)	27	15
W0602100519	2100519-001	38.248	-122.95	FE		290	UG/L	2015-07-27	WATER SUPPLY (WELLS)	DHS	MARIN	2	NO BASIN FOUND	10	2
W0602800724	2800724-001	38.567	-122.593	FE		500	UG/L	2014-09-09	WATER SUPPLY (WELLS)	DHS	NAPA	2	NO BASIN FOUND	4	3
SL1821Y617	GW-2	37.4333	-122.1	FE	ND	0	UG/L	2014-12-18	ENVIRONMENTAL MONITORING (WELLS)	EDF	SANTA CLARA	2	SANTA CLARA VALLEY - SANTA CLARA (2-9.02)	24	13
T10000000666	MW-04	37.8923	-122.112	FE	=	2850	UG/L	2014-05-29	ENVIRONMENTAL MONITORING (WELLS)	EDF	CONTRA COSTA	2	NO BASIN FOUND	16	7
T10000001468	MPMW6-3	37.6278	-122.416	FE	=	17000	UG/L	2014-07-10	ENVIRONMENTAL MONITORING (WELLS)	EDF	SAN MATEO	2	WESTSIDE (2-35)	22	13
W0604310011	4310011-026	37.321	-121.92	FE		760	UG/L	2014-12-22	WATER SUPPLY (WELLS)	DHS	SANTA CLARA	2	SANTA CLARA VALLEY - SANTA CLARA (2-9.02)	28	15
W0604310011	4310011-133	37.321	-121.959	FE	<	100	UG/L	2014-07-08	WATER SUPPLY (WELLS)	DHS	SANTA CLARA	2	SANTA CLARA VALLEY - SANTA CLARA (2-9.02)	28	15
L10006514573	H-5	37.4103	-121.972	FE	=	190	UG/L	2016-08-23	ENVIRONMENTAL MONITORING (WELLS)	EDF	SANTA CLARA	2	SANTA CLARA VALLEY - SANTA CLARA (2-9.02)	25	10
T10000000901	MW2	37.3506	-121.974	FE	=	1900	UG/L	2013-12-30	ENVIRONMENTAL MONITORING (WELLS)	EDF	SANTA CLARA	2	SANTA CLARA VALLEY - SANTA CLARA (2-9.02)	25	10
T10000000901	MW2	37.3506	-121.974	FE	=	6.73	UG/L	2014-03-03	ENVIRONMENTAL MONITORING (WELLS)	EDF	SANTA CLARA	2	SANTA CLARA VALLEY - SANTA CLARA (2-9.02)	25	10
T10000000901	MW2	37.3506	-121.974	FE	=	185	UG/L	2014-03-03	ENVIRONMENTAL MONITORING (WELLS)	EDF	SANTA CLARA	2	SANTA CLARA VALLEY - SANTA CLARA (2-9.02)	25	10
T10000000901	MW2	37.3506	-121.974	FE	ND	0	UG/L	2016-08-23	ENVIRONMENTAL MONITORING (WELLS)	EDF	SANTA CLARA	2	SANTA CLARA VALLEY - SANTA CLARA (2-9.02)	25	10
T0600101410	DW-9	37.6799	-121.777	FE	=	1300	UG/L	2014-06-11	ENVIRONMENTAL MONITORING (WELLS)	EDF	ALAMEDA	2	LIVERMORE VALLEY (2-10)	16	7
T0600101410	DW-9	37.6799	-121.777	FE	=	4700	UG/L	2014-11-13	ENVIRONMENTAL MONITORING (WELLS)	EDF	ALAMEDA	2	LIVERMORE VALLEY (2-10)	16	7
L10006514573	G-01	37.4107	-121.969	FE	ND	0	UG/L	2014-07-14	ENVIRONMENTAL MONITORING (WELLS)	EDF	SANTA CLARA	2	SANTA CLARA VALLEY - SANTA CLARA (2-9.02)	25	10
L10006514573	G-01	37.4107	-121.969	FE	ND	0	UG/L	2015-08-12	ENVIRONMENTAL MONITORING (WELLS)	EDF	SANTA CLARA	2	SANTA CLARA VALLEY - SANTA CLARA (2-9.02)	25	10
SL1823F1131	EX-2	37.3872	-121.942	FE	=	106	UG/L	2015-09-29	ENVIRONMENTAL MONITORING (WELLS)	EDF	SANTA CLARA	2	SANTA CLARA VALLEY - SANTA CLARA (2-9.02)	25	10
T0609592162	MW-M21	38.0598	-122.527	FE	<	190	UG/L	2014-11-12	ENVIRONMENTAL MONITORING (WELLS)	EDF	MARIN	2	NOVATO VALLEY (2-30)	10	2
SL1821Y617	MW-15	37.4337	-122.1	FE	=	180	UG/L	2014-12-18	ENVIRONMENTAL MONITORING (WELLS)	EDF	SANTA CLARA	2	SANTA CLARA VALLEY - SANTA CLARA (2-9.02)	24	13
T0600101803	EW-2	37.7683	-122.24	FE	=	840	UG/L	2014-06-19	ENVIRONMENTAL MONITORING (WELLS)	EDF	ALAMEDA	2	SANTA CLARA VALLEY - EAST BAY PLAIN (2-9.04)	18	9
L10009353957	GW-31A	37.9539	-122.374	FE	=	460	UG/L	2014-01-28	ENVIRONMENTAL MONITORING (WELLS)	EDF	CONTRA COSTA	2	SANTA CLARA VALLEY - EAST BAY PLAIN (2-9.04)	15	9
T0600100939	MW-8	37.733	-122.201	FE	=	3500	UG/L	2014-02-05	ENVIRONMENTAL MONITORING (WELLS)	EDF	ALAMEDA	2	SANTA CLARA VALLEY - EAST BAY PLAIN (2-9.04)	18	9
T0600100939	MW-8	37.733	-122.201	FE	=	4400	UG/L	2015-02-05	ENVIRONMENTAL MONITORING (WELLS)	EDF	ALAMEDA	2	SANTA CLARA VALLEY - EAST BAY PLAIN (2-9.04)	18	9
T0601300383	MW-9	37.7769	-121.978	FE	=	88400	UG/L	2015-04-08	ENVIRONMENTAL MONITORING (WELLS)	EDF	CONTRA COSTA	2	SAN RAMON VALLEY (2-7)	16	7
T0601300383	MW-9	37.7769	-121.978	FE	=	88000	UG/L	2015-04-23	ENVIRONMENTAL MONITORING (WELLS)	EDF	CONTRA COSTA	2	SAN RAMON VALLEY (2-7)	16	7
T0601300383	MW-9	37.7769	-121.978	FE	=	74900	UG/L	2015-05-28	ENVIRONMENTAL MONITORING (WELLS)	EDF	CONTRA COSTA	2	SAN RAMON VALLEY (2-7)	16	7
T0601300383	MW-13	37.7767	-121.978	FE	=	31400	UG/L	2015-05-13	ENVIRONMENTAL MONITORING (WELLS)	EDF	CONTRA COSTA	2	SAN RAMON VALLEY (2-7)	16	7
T10000001468	MPMW5-2	37.6279	-122.416	FE	=	27000	UG/L	2015-05-07	ENVIRONMENTAL MONITORING (WELLS)	EDF	SAN MATEO	2	WESTSIDE (2-35)	22	13
T0601300383	SW-2	37.7766	-121.978	FE	=	28400	UG/L	2015-03-20	ENVIRONMENTAL MONITORING (WELLS)	EDF	CONTRA COSTA	2	SAN RAMON VALLEY (2-7)	16	7
T0601300383	SW-2	37.7766	-121.978	FE	=	89400	UG/L	2015-05-13	ENVIRONMENTAL MONITORING (WELLS)	EDF	CONTRA COSTA	2	SAN RAMON VALLEY (2-7)	16	7
L10006224883	L-5	37.8717	-122.318	FE	=	17000	UG/L	2016-07-19	ENVIRONMENTAL MONITORING (WELLS)	EDF	ALAMEDA	2	SANTA CLARA VALLEY - EAST BAY PLAIN (2-9.04)	15	9
T0609592161	NA-0	38.0555	-122.528	FE	ND	0	UG/L	2014-11-12	ENVIRONMENTAL MONITORING (WELLS)	EDF	MARIN	2	NOVATO VALLEY (2-30)	10	2
SL0600106796	MW-20R	37.527	-122.034	FE	ND	0	UG/L	2016-05-09	ENVIRONMENTAL MONITORING (WELLS)	EDF	ALAMEDA	2	SANTA CLARA VALLEY - NILES CONE (2-9.01)	25	10
T0600101516	OW5	37.6933	-122.068	FE	=	2300	UG/L	2014-10-09	ENVIRONMENTAL MONITORING (WELLS)	EDF	ALAMEDA	2	CASTRO VALLEY (2-8)	20	10
T0608164698	S-2	37.5886	-122.363	FE	=	9800	UG/L	2013-12-06	ENVIRONMENTAL MONITORING (WELLS)	EDF	SAN MATEO	2	WESTSIDE (2-35)	22	13
T0608100661	P-2	37.4947	-122.215	FE	=	12000	UG/L	2015-08-28	ENVIRONMENTAL MONITORING (WELLS)	EDF	SAN MATEO	2	SANTA CLARA VALLEY - SAN MATEO PLAIN (2-9.03)	22	13
T0600101516	C4	37.6933	-122.068	FE	=	7200	UG/L	2014-10-09	ENVIRONMENTAL MONITORING (WELLS)	EDF	ALAMEDA	2	CASTRO VALLEY (2-8)	20	10
T0608501548	MW-3D2	37.3003	-121.822	FE	ND	0	UG/L	2013-12-19	ENVIRONMENTAL MONITORING (WELLS)	EDF	SANTA CLARA	2	SANTA CLARA VALLEY - SANTA CLARA (2-9.02)	27	15
T0609592162	IT-GMP-15	38.062	-122.526	FE	=	1300	UG/L	2014-11-13	ENVIRONMENTAL MONITORING (WELLS)	EDF	MARIN	2	NOVATO VALLEY (2-30)	10	2
T0600101486	MW-7	37.7987	-122.27	FE	=	480	UG/L	2014-02-06	ENVIRONMENTAL MONITORING (WELLS)	EDF	ALAMEDA	2	SANTA CLARA VALLEY - EAST BAY PLAIN (2-9.04)	18	9
T0600101516	EW1	37.6933	-122.068	FE	=	180	UG/L	2014-10-14	ENVIRONMENTAL MONITORING (WELLS)	EDF	ALAMEDA	2	CASTRO VALLEY (2-8)	20	10
T0600101516	EW1	37.6933	-122.068	FE	=	280	UG/L	2015-01-28	ENVIRONMENTAL MONITORING (WELLS)	EDF	ALAMEDA	2	CASTRO VALLEY (2-8)	20	10
T0600101516	EW1	37.6933	-122.068	FE	ND	0	UG/L	2015-01-28	ENVIRONMENTAL MONITORING (WELLS)	EDF	ALAMEDA	2	CASTRO VALLEY (2-8)	20	10
T0608500255	C-4	37.3207	-121.972	FE	=	3500	UG/L	2016-04-27	ENVIRONMENTAL MONITORING (WELLS)	EDF	SANTA CLARA	2	SANTA CLARA VALLEY - SANTA CLARA (2-9.02)	28	15
T0600101516	EW2	37.6934	-122.068	FE	=	5300	UG/L	2014-10-14	ENVIRONMENTAL MONITORING (WELLS)	EDF	ALAMEDA	2	CASTRO VALLEY (2-8)	20	10
T0600101516	C1	37.6933	-122.068	FE	=	6500	UG/L	2015-12-15	ENVIRONMENTAL MONITORING (WELLS)	EDF	ALAMEDA	2	CASTRO VALLEY (2-8)	20	10
T0601300383	MW-10	37.7771	-121.977	FE	=	22800	UG/L	2015-04-09	ENVIRONMENTAL MONITORING (WELLS)	EDF	CONTRA COSTA	2	SAN RAMON VALLEY (2-7)	16	7
T0601300383	MW-10	37.7771	-121.977	FE	=	5650	UG/L	2015-07-20	ENVIRONMENTAL MONITORING (WELLS)	EDF	CONTRA COSTA	2	SAN RAMON VALLEY (2-7)	16	7
T0608164698	MW-7	37.5887	-122.363	FE	ND	0	UG/L	2013-12-05	ENVIRONMENTAL MONITORING (WELLS)	EDF	SAN MATEO	2	WESTSIDE (2-35)	22	13
L10006514573	G-06	37.4145	-121.972	FE	ND	0	UG/L	2016-03-04	ENVIRONMENTAL MONITORING (WELLS)	EDF	SANTA CLARA	2	SANTA CLARA VALLEY - SANTA CLARA (2-9.02)	25	10
L10006514573	G-3R	37.4137	-121.965	FE	=	63	UG/L	2014-07-14	ENVIRONMENTAL MONITORING (WELLS)	EDF	SANTA CLARA	2	SANTA CLARA VALLEY - SANTA CLARA (2-9.02)	25	10
SL0608125065	MW-63	37.4171	-122.207	FE	ND	0	UG/L	2015-08-18	ENVIRONMENTAL MONITORING (WELLS)	EDF	SAN MATEO	2	SANTA CLARA VALLEY - SAN MATEO PLAIN (2-9.03)	24	13
L10009353957	CW-6	37.9514	-122.38	FE	=	3000	UG/L	2015-05-20	ENVIRONMENTAL MONITORING (WELLS)	EDF	CONTRA COSTA	2	NO BASIN FOUND	15	9
SL18244665	GW-6B-2	37.9449	-122.374	FE	ND	0	UG/L	2016-01-07	ENVIRONMENTAL MONITORING (WELLS)	EDF	CONTRA COSTA	2	SANTA CLARA VALLEY - EAST BAY PLAIN (2-9.04)	15	9
T10000001468	MPMW3-5	37.6277	-122.416	FE	=	200000	UG/L	2014-10-15	ENVIRONMENTAL MONITORING (WELLS)	EDF	SAN MATEO	2	WESTSIDE (2-35)	22	13
T10000001468	MPMW3-5	37.6277	-122.416	FE	=	260000	UG/L	2015-07-22	ENVIRONMENTAL MONITORING (WELLS)	EDF	SAN MATEO	2	WESTSIDE (2-35)	22	13
T0608100661	MW-5A	37.4936	-122.215	FE	ND	0	UG/L	2015-08-28	ENVIRONMENTAL MONITORING (WELLS)	EDF	SAN MATEO	2	SANTA CLARA VALLEY - SAN MATEO PLAIN (2-9.03)	22	13
W0600110001	0110001-020	37.553	-121.959	FE	<	100	UG/L	2016-07-11	WATER SUPPLY (WELLS)	DHS	ALAMEDA	2	SANTA CLARA VALLEY - NILES CONE (2-9.01)	20	10
T0609592161	MW-M12	38.0631	-122.529	FE	ND	0	UG/L	2014-11-11	ENVIRONMENTAL MONITORING (WELLS)	EDF	MARIN	2	NOVATO VALLEY (2-30)	10	2
T0600101516	OW4	37.6933	-122.068	FE	ND	0	UG/L	2015-01-27	ENVIRONMENTAL MONITORING (WELLS)	EDF	ALAMEDA	2	CASTRO VALLEY (2-8)	20	10
T10000001468	MPMW7-3	37.6275	-122.416	FE	ND	0	UG/L	2014-01-14	ENVIRONMENTAL MONITORING (WELLS)	EDF	SAN MATEO	2	WESTSIDE (2-35)	22	13
SL1823K1135	MW-7	37.55	-122.052	FE	=	2100	UG/L	2014-01-30	ENVIRONMENTAL MONITORING (WELLS)	EDF	ALAMEDA	2	SANTA CLARA VALLEY - NILES CONE (2-9.01)	25	10
T0600101866	MW-8A	37.8083	-122.314	FE	=	2800	UG/L	2013-12-13	ENVIRONMENTAL MONITORING (WELLS)	EDF	ALAMEDA	2	SANTA CLARA VALLEY - EAST BAY PLAIN (2-9.04)	18	9
T0608100077	MW-7	37.6866	-122.47	FE	=	160000	UG/L	2014-11-07	ENVIRONMENTAL MONITORING (WELLS)	EDF	SAN MATEO	2	WESTSIDE (2-35)	19	11
T0600101516	OW6	37.6933	-122.068	FE	=	510	UG/L	2015-12-15	ENVIRONMENTAL MONITORING (WELLS)	EDF	ALAMEDA	2	CASTRO VALLEY (2-8)	20	10
T0608100077	MW-11	37.6865	-122.47	FE	=	90000	UG/L	2014-11-07	ENVIRONMENTAL MONITORING (WELLS)	EDF	SAN MATEO	2	WESTSIDE (2-35)	19	11
T0608100077	MW-11	37.6865	-122.47	FE	=	1810	UG/L	2015-04-09	ENVIRONMENTAL MONITORING (WELLS)	EDF	SAN MATEO	2	WESTSIDE (2-35)	19	11
T0608100077	MW-11	37.6865	-122.47	FE	=	20900	UG/L	2015-09-16	ENVIRONMENTAL MONITORING (WELLS)	EDF	SAN MATEO	2	WESTSIDE (2-35)	19	11
T0600101803	MW-1	37.7684	-122.239	FE	=	20000	UG/L	2015-06-18	ENVIRONMENTAL MONITORING (WELLS)	EDF	ALAMEDA	2	SANTA CLARA VALLEY - EAST BAY PLAIN (2-9.04)	18	9
L10009353957	GW-63C	37.9539	-122.379	FE	ND	125	UG/L	2014-10-22	ENVIRONMENTAL MONITORING (WELLS)	EDF	CONTRA COSTA	2	SANTA CLARA VALLEY - EAST BAY PLAIN (2-9.04)	15	9
T0600100939	IW-6	37.7326	-122.201	FE	=	54000	UG/L	2014-08-29	ENVIRONMENTAL MONITORING (WELLS)	EDF	ALAMEDA	2	SANTA CLARA VALLEY - EAST BAY PLAIN (2-9.04)	18	9
T0600100939	IW-6	37.7326	-122.201	FE	=	65000	UG/L	2015-02-05	ENVIRONMENTAL MONITORING (WELLS)	EDF	ALAMEDA	2	SANTA CLARA VALLEY - EAST BAY PLAIN (2-9.04)	18	9
T10000001468	MPMW5-3	37.6279	-122.416	FE	=	140000	UG/L	2014-04-17	ENVIRONMENTAL MONITORING (WELLS)	EDF	SAN MATEO	2	WESTSIDE (2-35)	22	13
T10000001468	MPMW5-3	37.6279	-122.416	FE	=	30000	UG/L	2015-05-06	ENVIRONMENTAL MONITORING (WELLS)	EDF	SAN MATEO	2	WESTSIDE (2-35)	22	13
T0608100661	MW-2	37.4945	-122.215	FE	=	1000	UG/L	2014-12-30	ENVIRONMENTAL MONITORING (WELLS)	EDF	SAN MATEO	2	SANTA CLARA VALLEY - SAN MATEO PLAIN (2-9.03)	22	13
SL1823K1135	MW-3	37.5498	-122.052	FE	=	670	UG/L	2014-01-30	ENVIRONMENTAL MONITORING (WELLS)	EDF	ALAMEDA	2	SANTA CLARA VALLEY - NILES CONE (2-9.01)	25	10
SL0608183007	MW-1B	37.4882	-122.235	FE	=	6700	UG/L	2016-04-14	ENVIRONMENTAL MONITORING (WELLS)	EDF	SAN MATEO	2	SANTA CLARA VALLEY - SAN MATEO PLAIN (2-9.03)	22	13
T0601300383	SW-3	37.7767	-121.978	FE	=	3330	UG/L	2015-06-22	ENVIRONMENTAL MONITORING (WELLS)	EDF	CONTRA COSTA	2	SAN RAMON VALLEY (2-7)	16	7
SL20210828	503C	38.0233	-121.846	FE	ND	0	UG/L	2014-03-31	ENVIRONMENTAL MONITORING (WELLS)	EDF	CONTRA COSTA	2	PITTSBURG PLAIN (2-4)	11	7
T0600101016	MW-6	37.6153	-122.082	FE	=	1400	UG/L	2014-09-11	ENVIRONMENTAL MONITORING (WELLS)	EDF	ALAMEDA	2	SANTA CLARA VALLEY - EAST BAY PLAIN (2-9.04)	20	10
SL0600106796	MW-22A	37.5268	-122.033	FE	=	6200	UG/L	2016-05-09	ENVIRONMENTAL MONITORING (WELLS)	EDF	ALAMEDA	2	SANTA CLARA VALLEY - NILES CONE (2-9.01)	25	10
T0609700788	MW-15D	38.2357	-122.461	FE	=	42000	UG/L	2016-06-06	ENVIRONMENTAL MONITORING (WELLS)	EDF	SONOMA	2	NAPA-SONOMA VALLEY - SONOMA VALLEY (2-2.02)	10	3
T0609592161	IT-MW92-38	38.0617	-122.527	FE	ND	0	UG/L	2014-11-12	ENVIRONMENTAL MONITORING (WELLS)	EDF	MARIN	2	NOVATO VALLEY (2-30)	10	2
T0608164698	MW-4	37.5887	-122.363	FE	ND	0	UG/L	2013-12-05	ENVIRONMENTAL MONITORING (WELLS)	EDF	SAN MATEO	2	WESTSIDE (2-35)	22	13
SL18244665	GW-40C	37.9456	-122.373	FE	ND	35.6	UG/L	2015-10-05	ENVIRONMENTAL MONITORING (WELLS)	EDF	CONTRA COSTA	2	SANTA CLARA VALLEY - EAST BAY PLAIN (2-9.04)	15	9
SL720501209	VW-006	37.4131	-122.148	FE	=	7000	UG/L	2015-08-05	ENVIRONMENTAL MONITORING (WELLS)	EDF	SANTA CLARA	2	SANTA CLARA VALLEY - SANTA CLARA (2-9.02)	24	13
W0604310011	4310011-100	37.292	-121.92	FE		110	UG/L	2014-10-06	WATER SUPPLY (WELLS)	DHS	SANTA CLARA	2	SANTA CLARA VALLEY - SANTA CLARA (2-9.02)	28	15
W0604310012	4310012-027	37.35	-121.959	FE	<	100	UG/L	2014-08-26	WATER SUPPLY (WELLS)	DHS	SANTA CLARA	2	SANTA CLARA VALLEY - SANTA CLARA (2-9.02)	25	10
W0604310012	4310012-019	37.35	-121.959	FE	<	100	UG/L	2015-08-17	WATER SUPPLY (WELLS)	DHS	SANTA CLARA	2	SANTA CLARA VALLEY - SANTA CLARA (2-9.02)	25	10
W0604300986	4300986-001	37.176	-121.761	FE	<	100	UG/L	2015-03-18	WATER SUPPLY (WELLS)	DHS	SANTA CLARA	2	NO BASIN FOUND	29	17
W0604300986	4300986-001	37.176	-121.761	FE	<	0	UG/L	2016-06-21	WATER SUPPLY (WELLS)	DHS	SANTA CLARA	2	NO BASIN FOUND	29	17
W0604310011	4310011-053	37.379	-121.92	FE	<	100	UG/L	2014-05-15	WATER SUPPLY (WELLS)	DHS	SANTA CLARA	2	SANTA CLARA VALLEY - SANTA CLARA (2-9.02)	25	10
W0604310011	4310011-053	37.379	-121.92	FE		540	UG/L	2014-11-13	WATER SUPPLY (WELLS)	DHS	SANTA CLARA	2	SANTA CLARA VALLEY - SANTA CLARA (2-9.02)	25	10
W0604310011	4310011-086	37.292	-121.84	FE	<	100	UG/L	2014-04-08	WATER SUPPLY (WELLS)	DHS	SANTA CLARA	2	SANTA CLARA VALLEY - SANTA CLARA (2-9.02)	27	15
W0604110020	4110020-006	37.466	-122.157	FE	<	0	UG/L	2014-05-20	WATER SUPPLY (WELLS)	DHS	SAN MATEO	2	SANTA CLARA VALLEY - SAN MATEO PLAIN (2-9.03)	24	13
W0604110020	4110020-006	37.466	-122.157	FE		71	UG/L	2015-05-19	WATER SUPPLY (WELLS)	DHS	SAN MATEO	2	SANTA CLARA VALLEY - SAN MATEO PLAIN (2-9.03)	24	13
W0604110019	4110019-002	37.466	-122.157	FE	<	100	UG/L	2014-12-11	WATER SUPPLY (WELLS)	DHS	SAN MATEO	2	SANTA CLARA VALLEY - SAN MATEO PLAIN (2-9.03)	24	13
W0604300856	4300856-003	37.495	-121.84	FE		0	UG/L	2016-05-03	WATER SUPPLY (WELLS)	DHS	ALAMEDA	2	NO BASIN FOUND	20	7
W0600110001	0110001-049	37.524	-121.999	FE	<	100	UG/L	2016-07-19	WATER SUPPLY (WELLS)	DHS	ALAMEDA	2	SANTA CLARA VALLEY - NILES CONE (2-9.01)	25	10
W0604410016	4410016-004	37.234	-122.078	FE		1200	UG/L	2014-08-13	WATER SUPPLY (WELLS)	DHS	SANTA CLARA	2	NO BASIN FOUND	28	15
W0602800516	2800516-002	38.596	-122.435	FE	<	0	UG/L	2014-12-03	WATER SUPPLY (WELLS)	DHS	NAPA	2	NO BASIN FOUND	4	3
W0602800516	2800516-002	38.596	-122.435	FE		2500	UG/L	2016-07-13	WATER SUPPLY (WELLS)	DHS	NAPA	2	NO BASIN FOUND	4	3
W0604410016	4410016-004	37.234	-122.078	FE		120	UG/L	2014-12-04	WATER SUPPLY (WELLS)	DHS	SANTA CLARA	2	NO BASIN FOUND	28	15
T0600101016	MW-8	37.6154	-122.082	FE	ND	0	UG/L	2014-09-11	ENVIRONMENTAL MONITORING (WELLS)	EDF	ALAMEDA	2	SANTA CLARA VALLEY - EAST BAY PLAIN (2-9.04)	20	10
T0600101016	MW-8	37.6154	-122.082	FE	=	630	UG/L	2015-10-02	ENVIRONMENTAL MONITORING (WELLS)	EDF	ALAMEDA	2	SANTA CLARA VALLEY - EAST BAY PLAIN (2-9.04)	20	10
T0609592162	MW-M14D	38.0629	-122.527	FE	ND	0	UG/L	2014-11-11	ENVIRONMENTAL MONITORING (WELLS)	EDF	MARIN	2	NOVATO VALLEY (2-30)	10	2
L10006514573	G-10	37.4111	-121.972	FE	ND	0	UG/L	2014-02-27	ENVIRONMENTAL MONITORING (WELLS)	EDF	SANTA CLARA	2	SANTA CLARA VALLEY - SANTA CLARA (2-9.02)	25	10
L10006514573	G-08	37.4157	-121.974	FE	=	330	UG/L	2015-08-13	ENVIRONMENTAL MONITORING (WELLS)	EDF	SANTA CLARA	2	SANTA CLARA VALLEY - SANTA CLARA (2-9.02)	25	10
L10006514573	G-10	37.4111	-121.972	FE	ND	0	UG/L	2015-08-12	ENVIRONMENTAL MONITORING (WELLS)	EDF	SANTA CLARA	2	SANTA CLARA VALLEY - SANTA CLARA (2-9.02)	25	10
L10006514573	G-08	37.4157	-121.974	FE	=	540	UG/L	2016-03-04	ENVIRONMENTAL MONITORING (WELLS)	EDF	SANTA CLARA	2	SANTA CLARA VALLEY - SANTA CLARA (2-9.02)	25	10
T0601300383	ESE-4	37.7764	-121.978	FE	=	17400	UG/L	2015-07-20	ENVIRONMENTAL MONITORING (WELLS)	EDF	CONTRA COSTA	2	SAN RAMON VALLEY (2-7)	16	7
T10000003609	CW-6B	37.9535	-122.061	FE	=	6200	UG/L	2016-05-25	ENVIRONMENTAL MONITORING (WELLS)	EDF	CONTRA COSTA	2	YGNACIO VALLEY (2-6)	14	3
T10000003609	CW-6B	37.9535	-122.061	FE	=	1200	UG/L	2016-03-09	ENVIRONMENTAL MONITORING (WELLS)	EDF	CONTRA COSTA	2	YGNACIO VALLEY (2-6)	14	3
T10000003609	CW-6B	37.9535	-122.061	FE	=	460	UG/L	2016-08-29	ENVIRONMENTAL MONITORING (WELLS)	EDF	CONTRA COSTA	2	YGNACIO VALLEY (2-6)	14	3
L10009353957	GW-38C	37.9539	-122.376	FE	ND	111	UG/L	2014-02-10	ENVIRONMENTAL MONITORING (WELLS)	EDF	CONTRA COSTA	2	SANTA CLARA VALLEY - EAST BAY PLAIN (2-9.04)	15	9
L10009353957	GW-38C	37.9539	-122.376	FE	=	516	UG/L	2014-05-05	ENVIRONMENTAL MONITORING (WELLS)	EDF	CONTRA COSTA	2	SANTA CLARA VALLEY - EAST BAY PLAIN (2-9.04)	15	9
T0600101410	IP-10	37.6792	-121.776	FE	=	860	UG/L	2014-06-10	ENVIRONMENTAL MONITORING (WELLS)	EDF	ALAMEDA	2	LIVERMORE VALLEY (2-10)	16	7
L10009353957	GW-3A-2	37.9514	-122.38	FE	ND	0	UG/L	2014-05-01	ENVIRONMENTAL MONITORING (WELLS)	EDF	CONTRA COSTA	2	NO BASIN FOUND	15	9
L10009353957	GW-3A-2	37.9514	-122.38	FE	ND	0	UG/L	2015-07-14	ENVIRONMENTAL MONITORING (WELLS)	EDF	CONTRA COSTA	2	NO BASIN FOUND	15	9
T0609700943	MW-7	38.249	-122.626	FE	=	80000	UG/L	2014-11-06	ENVIRONMENTAL MONITORING (WELLS)	EDF	SONOMA	2	PETALUMA VALLEY (2-1)	10	3
T0601300383	ESE-1	37.7766	-121.978	FE	=	18400	UG/L	2015-02-16	ENVIRONMENTAL MONITORING (WELLS)	EDF	CONTRA COSTA	2	SAN RAMON VALLEY (2-7)	16	7
T0601300383	ESE-1	37.7766	-121.978	FE	=	44400	UG/L	2015-04-08	ENVIRONMENTAL MONITORING (WELLS)	EDF	CONTRA COSTA	2	SAN RAMON VALLEY (2-7)	16	7
T0600101410	MW-9	37.6796	-121.777	FE	=	1800	UG/L	2014-01-22	ENVIRONMENTAL MONITORING (WELLS)	EDF	ALAMEDA	2	LIVERMORE VALLEY (2-10)	16	7
T10000004547	MW-2B	37.221	-121.977	FE	=	15000	UG/L	2015-04-09	ENVIRONMENTAL MONITORING (WELLS)	EDF	SANTA CLARA	2	SANTA CLARA VALLEY - SANTA CLARA (2-9.02)	28	15
SL1821Y617	GW-6	37.4329	-122.099	FE	=	500	UG/L	2014-12-18	ENVIRONMENTAL MONITORING (WELLS)	EDF	SANTA CLARA	2	SANTA CLARA VALLEY - SANTA CLARA (2-9.02)	24	13
SL1821Y617	MW-10	37.4323	-122.099	FE	ND	0	UG/L	2014-12-19	ENVIRONMENTAL MONITORING (WELLS)	EDF	SANTA CLARA	2	SANTA CLARA VALLEY - SANTA CLARA (2-9.02)	24	13
SL18244665	GW-19A	37.9423	-122.372	FE	=	67400	UG/L	2014-09-16	ENVIRONMENTAL MONITORING (WELLS)	EDF	CONTRA COSTA	2	SANTA CLARA VALLEY - EAST BAY PLAIN (2-9.04)	15	9
SL18244665	GW-19A	37.9423	-122.372	FE	=	68700	UG/L	2015-09-16	ENVIRONMENTAL MONITORING (WELLS)	EDF	CONTRA COSTA	2	SANTA CLARA VALLEY - EAST BAY PLAIN (2-9.04)	15	9
SL1821Y617	MW-8	37.433	-122.1	FE	ND	0	UG/L	2014-12-19	ENVIRONMENTAL MONITORING (WELLS)	EDF	SANTA CLARA	2	SANTA CLARA VALLEY - SANTA CLARA (2-9.02)	24	13
T0608100661	MW-4	37.4938	-122.215	FE	=	940	UG/L	2015-04-01	ENVIRONMENTAL MONITORING (WELLS)	EDF	SAN MATEO	2	SANTA CLARA VALLEY - SAN MATEO PLAIN (2-9.03)	22	13
T0609700788	MW-15S	38.2357	-122.461	FE	=	23000	UG/L	2016-06-06	ENVIRONMENTAL MONITORING (WELLS)	EDF	SONOMA	2	NAPA-SONOMA VALLEY - SONOMA VALLEY (2-2.02)	10	3
T10000004547	MW-1A	37.2209	-121.977	FE	=	5400	UG/L	2015-04-09	ENVIRONMENTAL MONITORING (WELLS)	EDF	SANTA CLARA	2	SANTA CLARA VALLEY - SANTA CLARA (2-9.02)	28	15
T0608100147	C-10	37.6289	-122.417	FE	=	6600	UG/L	2014-02-12	ENVIRONMENTAL MONITORING (WELLS)	EDF	SAN MATEO	2	WESTSIDE (2-35)	22	13
L10009353957	GW-3C-1	37.9513	-122.38	FE	=	264	UG/L	2014-02-13	ENVIRONMENTAL MONITORING (WELLS)	EDF	CONTRA COSTA	2	NO BASIN FOUND	15	9
L10009353957	GW-3C-1	37.9513	-122.38	FE	=	356	UG/L	2015-05-07	ENVIRONMENTAL MONITORING (WELLS)	EDF	CONTRA COSTA	2	NO BASIN FOUND	15	9
L10009353957	GW-3C-1	37.9513	-122.38	FE	=	489	UG/L	2015-07-09	ENVIRONMENTAL MONITORING (WELLS)	EDF	CONTRA COSTA	2	NO BASIN FOUND	15	9
SL20268886	PMW-2U	37.5239	-122.049	FE	=	170	UG/L	2016-04-20	ENVIRONMENTAL MONITORING (WELLS)	EDF	ALAMEDA	2	SANTA CLARA VALLEY - NILES CONE (2-9.01)	25	10
T0600101410	DW-2	37.6796	-121.776	FE	=	900	UG/L	2015-01-21	ENVIRONMENTAL MONITORING (WELLS)	EDF	ALAMEDA	2	LIVERMORE VALLEY (2-10)	16	7
L10006514573	G-15	37.4043	-121.972	FE	ND	0	UG/L	2015-03-09	ENVIRONMENTAL MONITORING (WELLS)	EDF	SANTA CLARA	2	SANTA CLARA VALLEY - SANTA CLARA (2-9.02)	25	10
T0600101410	IP-1	37.6793	-121.776	FE	=	680	UG/L	2014-08-13	ENVIRONMENTAL MONITORING (WELLS)	EDF	ALAMEDA	2	LIVERMORE VALLEY (2-10)	16	7
T0608501140	MW-17	37.3493	-121.895	FE	=	3600	UG/L	2014-09-25	ENVIRONMENTAL MONITORING (WELLS)	EDF	SANTA CLARA	2	SANTA CLARA VALLEY - SANTA CLARA (2-9.02)	27	15
T0609700788	DW-1	38.235	-122.462	FE	ND	0	UG/L	2014-03-20	ENVIRONMENTAL MONITORING (WELLS)	EDF	SONOMA	2	NAPA-SONOMA VALLEY - SONOMA VALLEY (2-2.02)	10	3
T0600101410	MW-10	37.6793	-121.777	FE	ND	0	UG/L	2014-01-21	ENVIRONMENTAL MONITORING (WELLS)	EDF	ALAMEDA	2	LIVERMORE VALLEY (2-10)	16	7
T0601300335	MW-3	37.9757	-122.066	FE	=	1700	UG/L	2014-12-10	ENVIRONMENTAL MONITORING (WELLS)	EDF	CONTRA COSTA	2	YGNACIO VALLEY (2-6)	14	3
SL0608125065	MW-82	37.4171	-122.206	FE	=	830	UG/L	2014-08-27	ENVIRONMENTAL MONITORING (WELLS)	EDF	SAN MATEO	2	SANTA CLARA VALLEY - SAN MATEO PLAIN (2-9.03)	24	13
T0600101016	MW-17	37.6154	-122.082	FE	=	30000	UG/L	2015-10-02	ENVIRONMENTAL MONITORING (WELLS)	EDF	ALAMEDA	2	SANTA CLARA VALLEY - EAST BAY PLAIN (2-9.04)	20	10
T0608100572	MW-28C	37.5527	-122.315	FE	=	37000	UG/L	2014-01-02	ENVIRONMENTAL MONITORING (WELLS)	EDF	SAN MATEO	2	SANTA CLARA VALLEY - SAN MATEO PLAIN (2-9.03)	22	13
T0608500710	MW-31	37.3489	-121.893	FE	ND	0	UG/L	2014-01-22	ENVIRONMENTAL MONITORING (WELLS)	EDF	SANTA CLARA	2	SANTA CLARA VALLEY - SANTA CLARA (2-9.02)	27	15
T0608500710	MW-31	37.3489	-121.893	FE	ND	0	UG/L	2014-10-03	ENVIRONMENTAL MONITORING (WELLS)	EDF	SANTA CLARA	2	SANTA CLARA VALLEY - SANTA CLARA (2-9.02)	27	15
T10000003609	CW-4A	37.9532	-122.061	FE	=	1800	UG/L	2016-03-09	ENVIRONMENTAL MONITORING (WELLS)	EDF	CONTRA COSTA	2	YGNACIO VALLEY (2-6)	14	3
T0608501548	MW-3F	37.3003	-121.822	FE	ND	0	UG/L	2013-12-19	ENVIRONMENTAL MONITORING (WELLS)	EDF	SANTA CLARA	2	SANTA CLARA VALLEY - SANTA CLARA (2-9.02)	27	15
T10000003609	CW-8A	37.9538	-122.061	FE	=	740	UG/L	2015-12-16	ENVIRONMENTAL MONITORING (WELLS)	EDF	CONTRA COSTA	2	YGNACIO VALLEY (2-6)	14	3
T10000003609	CW-8A	37.9538	-122.061	FE	=	11000	UG/L	2016-05-25	ENVIRONMENTAL MONITORING (WELLS)	EDF	CONTRA COSTA	2	YGNACIO VALLEY (2-6)	14	3
L10006514573	G-13	37.4104	-121.975	FE	ND	0	UG/L	2015-08-12	ENVIRONMENTAL MONITORING (WELLS)	EDF	SANTA CLARA	2	SANTA CLARA VALLEY - SANTA CLARA (2-9.02)	25	10
L10006514573	G-13	37.4104	-121.975	FE	=	130	UG/L	2016-03-03	ENVIRONMENTAL MONITORING (WELLS)	EDF	SANTA CLARA	2	SANTA CLARA VALLEY - SANTA CLARA (2-9.02)	25	10
L10009353957	GW-77A	37.95	-122.38	FE	=	29800	UG/L	2014-01-23	ENVIRONMENTAL MONITORING (WELLS)	EDF	CONTRA COSTA	2	NO BASIN FOUND	15	9
T0600100980	MW-14	37.766	-122.243	FE	=	28000	UG/L	2014-06-26	ENVIRONMENTAL MONITORING (WELLS)	EDF	ALAMEDA	2	SANTA CLARA VALLEY - EAST BAY PLAIN (2-9.04)	18	9
T0608501140	EW-2	37.3491	-121.895	FE	=	400	UG/L	2014-09-25	ENVIRONMENTAL MONITORING (WELLS)	EDF	SANTA CLARA	2	SANTA CLARA VALLEY - SANTA CLARA (2-9.02)	27	15
T0600101516	OW3	37.6934	-122.068	FE	=	800	UG/L	2014-10-14	ENVIRONMENTAL MONITORING (WELLS)	EDF	ALAMEDA	2	CASTRO VALLEY (2-8)	20	10
L10009353957	CW-9	37.9445	-122.376	FE	=	8350	UG/L	2015-07-22	ENVIRONMENTAL MONITORING (WELLS)	EDF	CONTRA COSTA	2	SANTA CLARA VALLEY - EAST BAY PLAIN (2-9.04)	15	9
L10006514573	G-18	37.4113	-121.972	FE	ND	0	UG/L	2015-03-06	ENVIRONMENTAL MONITORING (WELLS)	EDF	SANTA CLARA	2	SANTA CLARA VALLEY - SANTA CLARA (2-9.02)	25	10
L10006514573	G-18	37.4113	-121.972	FE	ND	0	UG/L	2016-03-02	ENVIRONMENTAL MONITORING (WELLS)	EDF	SANTA CLARA	2	SANTA CLARA VALLEY - SANTA CLARA (2-9.02)	25	10
L10009353957	GW-61C-2	37.9467	-122.365	FE	ND	0	UG/L	2014-05-08	ENVIRONMENTAL MONITORING (WELLS)	EDF	CONTRA COSTA	2	SANTA CLARA VALLEY - EAST BAY PLAIN (2-9.04)	15	9
L10009353957	GW-61C-2	37.9467	-122.365	FE	ND	0	UG/L	2015-07-16	ENVIRONMENTAL MONITORING (WELLS)	EDF	CONTRA COSTA	2	SANTA CLARA VALLEY - EAST BAY PLAIN (2-9.04)	15	9
L10009353957	GW-61C-2	37.9467	-122.365	FE	ND	0	UG/L	2015-10-22	ENVIRONMENTAL MONITORING (WELLS)	EDF	CONTRA COSTA	2	SANTA CLARA VALLEY - EAST BAY PLAIN (2-9.04)	15	9
T0600101803	MW-3	37.7685	-122.24	FE	=	63	UG/L	2015-06-18	ENVIRONMENTAL MONITORING (WELLS)	EDF	ALAMEDA	2	SANTA CLARA VALLEY - EAST BAY PLAIN (2-9.04)	18	9
T10000000901	MW3	37.3515	-121.974	FE	=	4.58	UG/L	2014-03-03	ENVIRONMENTAL MONITORING (WELLS)	EDF	SANTA CLARA	2	SANTA CLARA VALLEY - SANTA CLARA (2-9.02)	25	10
T10000000901	MW3	37.3515	-121.974	FE	=	288	UG/L	2016-02-25	ENVIRONMENTAL MONITORING (WELLS)	EDF	SANTA CLARA	2	SANTA CLARA VALLEY - SANTA CLARA (2-9.02)	25	10
T0608100147	C-12	37.6289	-122.417	FE	=	14000	UG/L	2014-02-12	ENVIRONMENTAL MONITORING (WELLS)	EDF	SAN MATEO	2	WESTSIDE (2-35)	22	13
L10009353957	GW-61A-2	37.9467	-122.365	FE	ND	0	UG/L	2014-02-11	ENVIRONMENTAL MONITORING (WELLS)	EDF	CONTRA COSTA	2	SANTA CLARA VALLEY - EAST BAY PLAIN (2-9.04)	15	9
L10009353957	GW-61A-2	37.9467	-122.365	FE	ND	195	UG/L	2014-08-12	ENVIRONMENTAL MONITORING (WELLS)	EDF	CONTRA COSTA	2	SANTA CLARA VALLEY - EAST BAY PLAIN (2-9.04)	15	9
L10009353957	GW-61A-2	37.9467	-122.365	FE	ND	152	UG/L	2015-02-04	ENVIRONMENTAL MONITORING (WELLS)	EDF	CONTRA COSTA	2	SANTA CLARA VALLEY - EAST BAY PLAIN (2-9.04)	15	9
T0600141337	MW-11	37.5522	-122.055	FE	=	27000	UG/L	2015-02-11	ENVIRONMENTAL MONITORING (WELLS)	EDF	ALAMEDA	2	SANTA CLARA VALLEY - NILES CONE (2-9.01)	20	10
T0608100147	C-4	37.6288	-122.417	FE	=	4100	UG/L	2014-02-12	ENVIRONMENTAL MONITORING (WELLS)	EDF	SAN MATEO	2	WESTSIDE (2-35)	22	13
T0608100147	C-4	37.6288	-122.417	FE	=	7400	UG/L	2015-04-21	ENVIRONMENTAL MONITORING (WELLS)	EDF	SAN MATEO	2	WESTSIDE (2-35)	22	13
T0608500710	MW-22	37.3484	-121.892	FE	=	180	UG/L	2014-01-23	ENVIRONMENTAL MONITORING (WELLS)	EDF	SANTA CLARA	2	SANTA CLARA VALLEY - SANTA CLARA (2-9.02)	27	15
T0608500710	MW-22	37.3484	-121.892	FE	ND	0	UG/L	2014-10-03	ENVIRONMENTAL MONITORING (WELLS)	EDF	SANTA CLARA	2	SANTA CLARA VALLEY - SANTA CLARA (2-9.02)	27	15
T0608500710	MW-22	37.3484	-121.892	FE	=	240	UG/L	2015-12-03	ENVIRONMENTAL MONITORING (WELLS)	EDF	SANTA CLARA	2	SANTA CLARA VALLEY - SANTA CLARA (2-9.02)	27	15
T0608500710	MW-18	37.3486	-121.893	FE	=	460	UG/L	2015-12-03	ENVIRONMENTAL MONITORING (WELLS)	EDF	SANTA CLARA	2	SANTA CLARA VALLEY - SANTA CLARA (2-9.02)	27	15
T0608500710	MW-18	37.3486	-121.893	FE	ND	0	UG/L	2014-01-22	ENVIRONMENTAL MONITORING (WELLS)	EDF	SANTA CLARA	2	SANTA CLARA VALLEY - SANTA CLARA (2-9.02)	27	15
T0608500710	MW-4	37.3482	-121.893	FE	ND	0	UG/L	2014-07-29	ENVIRONMENTAL MONITORING (WELLS)	EDF	SANTA CLARA	2	SANTA CLARA VALLEY - SANTA CLARA (2-9.02)	27	15
T0608500710	MW-4	37.3482	-121.893	FE	ND	0	UG/L	2015-12-02	ENVIRONMENTAL MONITORING (WELLS)	EDF	SANTA CLARA	2	SANTA CLARA VALLEY - SANTA CLARA (2-9.02)	27	15
T10000000901	MW4	37.3518	-121.974	FE	=	1620	UG/L	2014-09-08	ENVIRONMENTAL MONITORING (WELLS)	EDF	SANTA CLARA	2	SANTA CLARA VALLEY - SANTA CLARA (2-9.02)	25	10
T10000000901	MW4	37.3518	-121.974	FE	=	14600	UG/L	2016-08-23	ENVIRONMENTAL MONITORING (WELLS)	EDF	SANTA CLARA	2	SANTA CLARA VALLEY - SANTA CLARA (2-9.02)	25	10
SL0608183007	MW-1A	37.4882	-122.235	FE	=	23000	UG/L	2016-04-14	ENVIRONMENTAL MONITORING (WELLS)	EDF	SAN MATEO	2	SANTA CLARA VALLEY - SAN MATEO PLAIN (2-9.03)	22	13
W0604310011	4310011-011	37.263	-121.88	FE		230	UG/L	2014-05-20	WATER SUPPLY (WELLS)	DHS	SANTA CLARA	2	SANTA CLARA VALLEY - SANTA CLARA (2-9.02)	28	15
W0602800625	2800625-005	38.567	-122.474	FE	<	100	UG/L	2014-03-19	WATER SUPPLY (WELLS)	DHS	NAPA	2	NO BASIN FOUND	4	3
W0602800625	2800625-005	38.567	-122.474	FE	<	100	UG/L	2014-06-24	WATER SUPPLY (WELLS)	DHS	NAPA	2	NO BASIN FOUND	4	3
W0602800625	2800625-005	38.567	-122.474	FE	<	100	UG/L	2014-12-16	WATER SUPPLY (WELLS)	DHS	NAPA	2	NO BASIN FOUND	4	3
W0602800625	2800625-005	38.567	-122.474	FE	<	100	UG/L	2016-03-22	WATER SUPPLY (WELLS)	DHS	NAPA	2	NO BASIN FOUND	4	3
W0604310011	4310011-127	37.321	-121.959	FE		120	UG/L	2014-05-01	WATER SUPPLY (WELLS)	DHS	SANTA CLARA	2	SANTA CLARA VALLEY - SANTA CLARA (2-9.02)	28	15
W0604310011	4310011-130	37.321	-121.959	FE	<	100	UG/L	2014-10-14	WATER SUPPLY (WELLS)	DHS	SANTA CLARA	2	SANTA CLARA VALLEY - SANTA CLARA (2-9.02)	28	15
W0604310011	4310011-130	37.321	-121.959	FE	<	100	UG/L	2015-01-12	WATER SUPPLY (WELLS)	DHS	SANTA CLARA	2	SANTA CLARA VALLEY - SANTA CLARA (2-9.02)	28	15
W0602110006	2110006-002	38.075	-122.791	FE		0.111	UG/L	2014-11-18	WATER SUPPLY (WELLS)	DHS	MARIN	2	NO BASIN FOUND	10	2
W0600110010	0110010-011	37.669	-121.88	FE		0	UG/L	2016-02-09	WATER SUPPLY (WELLS)	DHS	ALAMEDA	2	LIVERMORE VALLEY (2-10)	16	7
W0602110007	2110007-005	38.248	-122.95	FE	<	0	UG/L	2015-06-04	WATER SUPPLY (WELLS)	DHS	MARIN	2	NO BASIN FOUND	10	2
W0604110013	4110013-013	37.698	-122.474	FE	<	0	UG/L	2015-12-09	WATER SUPPLY (WELLS)	DHS	SAN MATEO	2	WESTSIDE (2-35)	19	11
W0604110013	4110013-011	37.698	-122.474	FE	<	0	UG/L	2016-02-03	WATER SUPPLY (WELLS)	DHS	SAN MATEO	2	WESTSIDE (2-35)	19	11
W0602110007	2110007-001	38.248	-122.95	FE		1.715	UG/L	2014-07-15	WATER SUPPLY (WELLS)	DHS	MARIN	2	NO BASIN FOUND	10	2
W0604310011	4310011-027	37.321	-121.92	FE		100	UG/L	2014-11-05	WATER SUPPLY (WELLS)	DHS	SANTA CLARA	2	SANTA CLARA VALLEY - SANTA CLARA (2-9.02)	28	15
W0602110007	2110007-001	38.248	-122.95	FE	<	0	UG/L	2014-04-15	WATER SUPPLY (WELLS)	DHS	MARIN	2	NO BASIN FOUND	10	2
W0604310011	4310011-027	37.321	-121.92	FE	<	0	UG/L	2016-04-19	WATER SUPPLY (WELLS)	DHS	SANTA CLARA	2	SANTA CLARA VALLEY - SANTA CLARA (2-9.02)	28	15
W0602110007	2110007-001	38.248	-122.95	FE		18.32	UG/L	2015-02-17	WATER SUPPLY (WELLS)	DHS	MARIN	2	NO BASIN FOUND	10	2
W0602110007	2110007-001	38.248	-122.95	FE	<	0	UG/L	2015-09-22	WATER SUPPLY (WELLS)	DHS	MARIN	2	NO BASIN FOUND	10	2
W0602110007	2110007-001	38.248	-122.95	FE	<	0	UG/L	2016-01-12	WATER SUPPLY (WELLS)	DHS	MARIN	2	NO BASIN FOUND	10	2
W0602110007	2110007-001	38.248	-122.95	FE	<	0	UG/L	2016-03-22	WATER SUPPLY (WELLS)	DHS	MARIN	2	NO BASIN FOUND	10	2
W0604900562	4900562-001	38.306	-122.553	FE	<	100	UG/L	2014-10-24	WATER SUPPLY (WELLS)	DHS	SONOMA	2	NO BASIN FOUND	4	3
W0604310011	4310011-156	37.321	-121.88	FE		130	UG/L	2015-11-23	WATER SUPPLY (WELLS)	DHS	SANTA CLARA	2	SANTA CLARA VALLEY - SANTA CLARA (2-9.02)	27	15
W0604110028	4110028-003	37.495	-122.514	FE		2600	UG/L	2015-04-20	WATER SUPPLY (WELLS)	DHS	SAN MATEO	2	HALF MOON BAY TERRACE (2-22)	22	13
W0602801008	2801008-001	38.596	-122.593	FE		190	UG/L	2016-04-05	WATER SUPPLY (WELLS)	DHS	NAPA	2	NAPA-SONOMA VALLEY - NAPA VALLEY (2-2.01)	4	3
W0602801024	2801024-001	38.48	-122.395	FE	<	100	UG/L	2014-06-04	WATER SUPPLY (WELLS)	DHS	NAPA	2	NO BASIN FOUND	4	3
W0604310011	4310011-132	37.321	-121.959	FE		520	UG/L	2016-02-09	WATER SUPPLY (WELLS)	DHS	SANTA CLARA	2	SANTA CLARA VALLEY - SANTA CLARA (2-9.02)	28	15
W0602801016	2801016-001	38.335	-122.395	FE	<	0	UG/L	2015-05-18	WATER SUPPLY (WELLS)	DHS	NAPA	2	NO BASIN FOUND	4	3
W0604110028	4110028-004	37.524	-122.514	FE		5100	UG/L	2014-01-20	WATER SUPPLY (WELLS)	DHS	SAN MATEO	2	HALF MOON BAY TERRACE (2-22)	22	13
W0604110024	4110024-001	37.437	-122.157	FE		160	UG/L	2015-03-25	WATER SUPPLY (WELLS)	DHS	SANTA CLARA	2	SANTA CLARA VALLEY - SANTA CLARA (2-9.02)	24	13
T10000002937	MW-6	37.2215	-121.979	FE	=	4800	UG/L	2015-08-03	ENVIRONMENTAL MONITORING (WELLS)	EDF	SANTA CLARA	2	SANTA CLARA VALLEY - SANTA CLARA (2-9.02)	28	15
W0604310011	4310011-029	37.321	-121.92	FE		430	UG/L	2016-07-19	WATER SUPPLY (WELLS)	DHS	SANTA CLARA	2	SANTA CLARA VALLEY - SANTA CLARA (2-9.02)	28	15
T0608500710	MW-19	37.3487	-121.893	FE	ND	0	UG/L	2014-01-22	ENVIRONMENTAL MONITORING (WELLS)	EDF	SANTA CLARA	2	SANTA CLARA VALLEY - SANTA CLARA (2-9.02)	27	15
T0608500710	MW-19	37.3487	-121.893	FE	ND	0	UG/L	2015-06-18	ENVIRONMENTAL MONITORING (WELLS)	EDF	SANTA CLARA	2	SANTA CLARA VALLEY - SANTA CLARA (2-9.02)	27	15
T0600101803	EW-4	37.7685	-122.239	FE	ND	0	UG/L	2015-06-18	ENVIRONMENTAL MONITORING (WELLS)	EDF	ALAMEDA	2	SANTA CLARA VALLEY - EAST BAY PLAIN (2-9.04)	18	9
L10006514573	G-11	37.4131	-121.971	FE	=	46	UG/L	2014-03-03	ENVIRONMENTAL MONITORING (WELLS)	EDF	SANTA CLARA	2	SANTA CLARA VALLEY - SANTA CLARA (2-9.02)	25	10
L10006514573	G-11	37.4131	-121.971	FE	ND	0	UG/L	2014-07-18	ENVIRONMENTAL MONITORING (WELLS)	EDF	SANTA CLARA	2	SANTA CLARA VALLEY - SANTA CLARA (2-9.02)	25	10
T0600101410	DW-8	37.6792	-121.776	FE	=	1800	UG/L	2014-01-22	ENVIRONMENTAL MONITORING (WELLS)	EDF	ALAMEDA	2	LIVERMORE VALLEY (2-10)	16	7
T0601300383	ESE-5	37.7766	-121.978	FE	=	810	UG/L	2015-04-23	ENVIRONMENTAL MONITORING (WELLS)	EDF	CONTRA COSTA	2	SAN RAMON VALLEY (2-7)	16	7
T0600101410	DW-1	37.6794	-121.776	FE	=	1300	UG/L	2014-08-13	ENVIRONMENTAL MONITORING (WELLS)	EDF	ALAMEDA	2	LIVERMORE VALLEY (2-10)	16	7
T0601300383	ESE-5	37.7766	-121.978	FE	=	41600	UG/L	2015-05-28	ENVIRONMENTAL MONITORING (WELLS)	EDF	CONTRA COSTA	2	SAN RAMON VALLEY (2-7)	16	7
T0608100661	MW-7	37.4947	-122.216	FE	=	8000	UG/L	2015-04-01	ENVIRONMENTAL MONITORING (WELLS)	EDF	SAN MATEO	2	SANTA CLARA VALLEY - SAN MATEO PLAIN (2-9.03)	22	13
SL0608125065	MW-64	37.4174	-122.206	FE	ND	0	UG/L	2015-08-19	ENVIRONMENTAL MONITORING (WELLS)	EDF	SAN MATEO	2	SANTA CLARA VALLEY - SAN MATEO PLAIN (2-9.03)	24	13
L10006514573	G-19	37.4109	-121.973	FE	=	41	UG/L	2016-03-03	ENVIRONMENTAL MONITORING (WELLS)	EDF	SANTA CLARA	2	SANTA CLARA VALLEY - SANTA CLARA (2-9.02)	25	10
T0600100980	EW-17	37.7661	-122.243	FE	=	31000	UG/L	2014-06-25	ENVIRONMENTAL MONITORING (WELLS)	EDF	ALAMEDA	2	SANTA CLARA VALLEY - EAST BAY PLAIN (2-9.04)	18	9
T0608100147	E-1	37.6288	-122.417	FE	=	3400	UG/L	2014-06-04	ENVIRONMENTAL MONITORING (WELLS)	EDF	SAN MATEO	2	WESTSIDE (2-35)	22	13
W0600110010	0110010-012	37.698	-121.88	FE	<	0	UG/L	2014-01-06	WATER SUPPLY (WELLS)	DHS	ALAMEDA	2	LIVERMORE VALLEY (2-10)	16	7
T0609592161	MW-1A	38.0559	-122.528	FE	=	18000	UG/L	2014-11-14	ENVIRONMENTAL MONITORING (WELLS)	EDF	MARIN	2	NOVATO VALLEY (2-30)	10	2
W0600110003	0110003-008	37.698	-121.801	FE	<	0	UG/L	2014-12-17	WATER SUPPLY (WELLS)	DHS	ALAMEDA	2	LIVERMORE VALLEY (2-10)	16	7
SL0608125065	MW-35	37.4173	-122.208	FE	ND	0	UG/L	2015-08-19	ENVIRONMENTAL MONITORING (WELLS)	EDF	SAN MATEO	2	SANTA CLARA VALLEY - SAN MATEO PLAIN (2-9.03)	24	13
T0600100980	EW-22	37.7661	-122.243	FE	=	23000	UG/L	2014-06-26	ENVIRONMENTAL MONITORING (WELLS)	EDF	ALAMEDA	2	SANTA CLARA VALLEY - EAST BAY PLAIN (2-9.04)	18	9
T10000003609	CW-3B	37.9532	-122.06	FE	=	97	UG/L	2016-03-09	ENVIRONMENTAL MONITORING (WELLS)	EDF	CONTRA COSTA	2	YGNACIO VALLEY (2-6)	14	3
SL18244665	GW-15A	37.9428	-122.373	FE	=	15200	UG/L	2015-09-15	ENVIRONMENTAL MONITORING (WELLS)	EDF	CONTRA COSTA	2	SANTA CLARA VALLEY - EAST BAY PLAIN (2-9.04)	15	9
T0608500710	MW-32	37.3484	-121.892	FE	ND	0	UG/L	2015-09-15	ENVIRONMENTAL MONITORING (WELLS)	EDF	SANTA CLARA	2	SANTA CLARA VALLEY - SANTA CLARA (2-9.02)	27	15
SL1823K1135	MW-6	37.55	-122.052	FE	=	1400	UG/L	2014-01-30	ENVIRONMENTAL MONITORING (WELLS)	EDF	ALAMEDA	2	SANTA CLARA VALLEY - NILES CONE (2-9.01)	25	10
T0608500710	MW-29	37.3486	-121.893	FE	ND	0	UG/L	2015-09-14	ENVIRONMENTAL MONITORING (WELLS)	EDF	SANTA CLARA	2	SANTA CLARA VALLEY - SANTA CLARA (2-9.02)	27	15
T10000001468	MPMW4-5	37.6275	-122.416	FE	=	2800	UG/L	2015-01-14	ENVIRONMENTAL MONITORING (WELLS)	EDF	SAN MATEO	2	WESTSIDE (2-35)	22	13
T10000001468	MPMW2-5	37.6275	-122.416	FE	=	29000	UG/L	2014-10-14	ENVIRONMENTAL MONITORING (WELLS)	EDF	SAN MATEO	2	WESTSIDE (2-35)	22	13
L10009353957	GW-38A	37.9539	-122.376	FE	=	404	UG/L	2015-01-22	ENVIRONMENTAL MONITORING (WELLS)	EDF	CONTRA COSTA	2	SANTA CLARA VALLEY - EAST BAY PLAIN (2-9.04)	15	9
SL1821Y617	MW-16D	37.433	-122.1	FE	=	2000	UG/L	2014-12-19	ENVIRONMENTAL MONITORING (WELLS)	EDF	SANTA CLARA	2	SANTA CLARA VALLEY - SANTA CLARA (2-9.02)	24	13
W0602801041	2801041-001	38.393	-122.355	FE		0	UG/L	2016-02-24	WATER SUPPLY (WELLS)	DHS	NAPA	2	NO BASIN FOUND	4	3
W0604100531	4100531-005	37.321	-122.276	FE		340	UG/L	2014-09-03	WATER SUPPLY (WELLS)	DHS	SAN MATEO	2	NO BASIN FOUND	24	13
T0608100147	C-11	37.6289	-122.417	FE	=	780	UG/L	2014-04-29	ENVIRONMENTAL MONITORING (WELLS)	EDF	SAN MATEO	2	WESTSIDE (2-35)	22	13
T0608100147	C-11	37.6289	-122.417	FE	=	1500	UG/L	2015-06-18	ENVIRONMENTAL MONITORING (WELLS)	EDF	SAN MATEO	2	WESTSIDE (2-35)	22	13
T0608100147	C-11	37.6289	-122.417	FE	=	4200	UG/L	2015-07-22	ENVIRONMENTAL MONITORING (WELLS)	EDF	SAN MATEO	2	WESTSIDE (2-35)	22	13
T0608100147	C-11	37.6289	-122.417	FE	=	6000	UG/L	2015-08-28	ENVIRONMENTAL MONITORING (WELLS)	EDF	SAN MATEO	2	WESTSIDE (2-35)	22	13
T0600100980	EW-16	37.766	-122.243	FE	=	3500	UG/L	2014-06-25	ENVIRONMENTAL MONITORING (WELLS)	EDF	ALAMEDA	2	SANTA CLARA VALLEY - EAST BAY PLAIN (2-9.04)	18	9
T0600101486	MW-1	37.7989	-122.27	FE	ND	0	UG/L	2014-08-14	ENVIRONMENTAL MONITORING (WELLS)	EDF	ALAMEDA	2	SANTA CLARA VALLEY - EAST BAY PLAIN (2-9.04)	18	9
W0600110001	0110001-046	37.524	-122.038	FE	<	100	UG/L	2014-07-22	WATER SUPPLY (WELLS)	DHS	ALAMEDA	2	SANTA CLARA VALLEY - NILES CONE (2-9.01)	25	10
W0600110001	0110001-048	37.553	-122.038	FE	<	100	UG/L	2015-07-21	WATER SUPPLY (WELLS)	DHS	ALAMEDA	2	SANTA CLARA VALLEY - NILES CONE (2-9.01)	25	10
T0601300383	MW-11	37.7768	-121.977	FE	=	950000	UG/L	2014-08-21	ENVIRONMENTAL MONITORING (WELLS)	EDF	CONTRA COSTA	2	SAN RAMON VALLEY (2-7)	16	7
T0608500710	MW-28	37.3486	-121.893	FE	ND	0	UG/L	2014-04-30	ENVIRONMENTAL MONITORING (WELLS)	EDF	SANTA CLARA	2	SANTA CLARA VALLEY - SANTA CLARA (2-9.02)	27	15
T10000003609	CW-3A	37.9532	-122.06	FE	=	88	UG/L	2016-03-09	ENVIRONMENTAL MONITORING (WELLS)	EDF	CONTRA COSTA	2	YGNACIO VALLEY (2-6)	14	3
T0608500710	EW-1	37.3482	-121.892	FE	ND	0	UG/L	2014-04-30	ENVIRONMENTAL MONITORING (WELLS)	EDF	SANTA CLARA	2	SANTA CLARA VALLEY - SANTA CLARA (2-9.02)	27	15
T0609592162	PG-MW1	38.0585	-122.527	FE	ND	0	UG/L	2014-11-13	ENVIRONMENTAL MONITORING (WELLS)	EDF	MARIN	2	NOVATO VALLEY (2-30)	10	2
T10000001468	MPMW4-3	37.6275	-122.416	FE	=	23000	UG/L	2015-05-07	ENVIRONMENTAL MONITORING (WELLS)	EDF	SAN MATEO	2	WESTSIDE (2-35)	22	13
T10000001468	MPMW4-3	37.6275	-122.416	FE	=	38000	UG/L	2015-07-21	ENVIRONMENTAL MONITORING (WELLS)	EDF	SAN MATEO	2	WESTSIDE (2-35)	22	13
T0600101803	EW-5	37.7685	-122.24	FE	=	15000	UG/L	2015-06-18	ENVIRONMENTAL MONITORING (WELLS)	EDF	ALAMEDA	2	SANTA CLARA VALLEY - EAST BAY PLAIN (2-9.04)	18	9
T0601300383	MW-8	37.7768	-121.978	FE	=	62100	UG/L	2015-04-08	ENVIRONMENTAL MONITORING (WELLS)	EDF	CONTRA COSTA	2	SAN RAMON VALLEY (2-7)	16	7
T0601300383	MW-8	37.7768	-121.978	FE	=	56600	UG/L	2015-04-23	ENVIRONMENTAL MONITORING (WELLS)	EDF	CONTRA COSTA	2	SAN RAMON VALLEY (2-7)	16	7
L10006514573	G-17	37.4132	-121.971	FE	ND	0	UG/L	2015-03-04	ENVIRONMENTAL MONITORING (WELLS)	EDF	SANTA CLARA	2	SANTA CLARA VALLEY - SANTA CLARA (2-9.02)	25	10
L10006514573	G-17	37.4132	-121.971	FE	ND	0	UG/L	2015-08-13	ENVIRONMENTAL MONITORING (WELLS)	EDF	SANTA CLARA	2	SANTA CLARA VALLEY - SANTA CLARA (2-9.02)	25	10
L10006514573	G-17	37.4132	-121.971	FE	ND	0	UG/L	2016-03-04	ENVIRONMENTAL MONITORING (WELLS)	EDF	SANTA CLARA	2	SANTA CLARA VALLEY - SANTA CLARA (2-9.02)	25	10
SL0608125065	MW-81	37.4172	-122.206	FE	ND	0	UG/L	2014-08-27	ENVIRONMENTAL MONITORING (WELLS)	EDF	SAN MATEO	2	SANTA CLARA VALLEY - SAN MATEO PLAIN (2-9.03)	24	13
SL0608125065	MW-81	37.4172	-122.206	FE	ND	0	UG/L	2015-09-03	ENVIRONMENTAL MONITORING (WELLS)	EDF	SAN MATEO	2	SANTA CLARA VALLEY - SAN MATEO PLAIN (2-9.03)	24	13
T0600100939	IW-4	37.7325	-122.202	FE	=	4900	UG/L	2014-08-29	ENVIRONMENTAL MONITORING (WELLS)	EDF	ALAMEDA	2	SANTA CLARA VALLEY - EAST BAY PLAIN (2-9.04)	18	9
W0602110501	2110501-004	38.046	-122.87	FE	<	0	UG/L	2014-11-04	WATER SUPPLY (WELLS)	DHS	MARIN	2	NO BASIN FOUND	10	2
W0602110501	2110501-004	38.046	-122.87	FE		100	UG/L	2016-04-05	WATER SUPPLY (WELLS)	DHS	MARIN	2	NO BASIN FOUND	10	2
W0602110501	2110501-004	38.046	-122.87	FE	<	100	UG/L	2016-08-16	WATER SUPPLY (WELLS)	DHS	MARIN	2	NO BASIN FOUND	10	2
W0602110006	2110006-003	38.075	-122.791	FE	<	0	UG/L	2013-12-10	WATER SUPPLY (WELLS)	DHS	MARIN	2	NO BASIN FOUND	10	2
W0602110006	2110006-003	38.075	-122.791	FE	<	0	UG/L	2014-03-11	WATER SUPPLY (WELLS)	DHS	MARIN	2	NO BASIN FOUND	10	2
W0602110006	2110006-003	38.075	-122.791	FE	<	0	UG/L	2014-11-18	WATER SUPPLY (WELLS)	DHS	MARIN	2	NO BASIN FOUND	10	2
W0602110006	2110006-003	38.075	-122.791	FE		0	UG/L	2015-09-22	WATER SUPPLY (WELLS)	DHS	MARIN	2	NO BASIN FOUND	10	2
W0602110006	2110006-001	38.075	-122.791	FE	<	100	UG/L	2014-09-09	WATER SUPPLY (WELLS)	DHS	MARIN	2	NO BASIN FOUND	10	2
W0604110013	4110013-010	37.698	-122.474	FE		580	UG/L	2015-08-04	WATER SUPPLY (WELLS)	DHS	SAN MATEO	2	WESTSIDE (2-35)	19	11
W0604110010	4110010-010	37.553	-122.514	FE	<	0	UG/L	2016-05-19	WATER SUPPLY (WELLS)	DHS	SAN MATEO	2	NO BASIN FOUND	22	13
W0602110501	2110501-003	38.046	-122.87	FE		1000	UG/L	2016-04-05	WATER SUPPLY (WELLS)	DHS	MARIN	2	NO BASIN FOUND	10	2
W0604310011	4310011-022	37.321	-121.92	FE	<	100	UG/L	2014-12-04	WATER SUPPLY (WELLS)	DHS	SANTA CLARA	2	SANTA CLARA VALLEY - SANTA CLARA (2-9.02)	28	15
W0604310011	4310011-024	37.321	-121.92	FE	<	100	UG/L	2014-12-08	WATER SUPPLY (WELLS)	DHS	SANTA CLARA	2	SANTA CLARA VALLEY - SANTA CLARA (2-9.02)	28	15
W0600105003	0105003-001	37.669	-121.84	FE	<	0	UG/L	2014-06-12	WATER SUPPLY (WELLS)	DHS	ALAMEDA	2	LIVERMORE VALLEY (2-10)	16	7
W0600110010	0110010-013	37.698	-121.88	FE	<	0	UG/L	2014-06-11	WATER SUPPLY (WELLS)	DHS	ALAMEDA	2	LIVERMORE VALLEY (2-10)	16	7
W0604910006	4910006-009	38.248	-122.633	FE		850	UG/L	2015-09-23	WATER SUPPLY (WELLS)	DHS	SONOMA	2	PETALUMA VALLEY (2-1)	10	3
W0604910006	4910006-009	38.248	-122.633	FE		300	UG/L	2015-12-16	WATER SUPPLY (WELLS)	DHS	SONOMA	2	PETALUMA VALLEY (2-1)	10	3
W0600110010	0110010-005	37.669	-121.92	FE	<	0	UG/L	2014-09-10	WATER SUPPLY (WELLS)	DHS	ALAMEDA	2	LIVERMORE VALLEY (2-10)	16	7
W0600110003	0110003-006	37.669	-121.761	FE	<	0	UG/L	2014-07-07	WATER SUPPLY (WELLS)	DHS	ALAMEDA	2	LIVERMORE VALLEY (2-10)	16	7
W0604910006	4910006-028	38.248	-122.593	FE		130	UG/L	2016-06-22	WATER SUPPLY (WELLS)	DHS	SONOMA	2	PETALUMA VALLEY (2-1)	10	3
W0602800625	2800625-006	38.567	-122.474	FE	<	100	UG/L	2014-03-19	WATER SUPPLY (WELLS)	DHS	NAPA	2	NO BASIN FOUND	4	3
W0602810004	2810004-006	38.509	-122.435	FE	<	0	UG/L	2015-11-16	WATER SUPPLY (WELLS)	DHS	NAPA	2	NO BASIN FOUND	4	3
W0600110001	0110001-009	37.553	-121.999	FE	<	100	UG/L	2014-08-05	WATER SUPPLY (WELLS)	DHS	ALAMEDA	2	SANTA CLARA VALLEY - NILES CONE (2-9.01)	20	10
W0600110001	0110001-021	37.553	-121.959	FE	<	100	UG/L	2015-07-13	WATER SUPPLY (WELLS)	DHS	ALAMEDA	2	SANTA CLARA VALLEY - NILES CONE (2-9.01)	20	10
W0600110001	0110001-021	37.553	-121.959	FE	<	100	UG/L	2016-07-25	WATER SUPPLY (WELLS)	DHS	ALAMEDA	2	SANTA CLARA VALLEY - NILES CONE (2-9.01)	20	10
W0604900533	4900533-001	38.393	-122.553	FE		110	UG/L	2015-06-08	WATER SUPPLY (WELLS)	DHS	SONOMA	2	NAPA-SONOMA VALLEY - SONOMA VALLEY (2-2.02)	4	2
W0604310011	4310011-106	37.292	-121.92	FE		150	UG/L	2013-12-09	WATER SUPPLY (WELLS)	DHS	SANTA CLARA	2	SANTA CLARA VALLEY - SANTA CLARA (2-9.02)	28	15
W0604310011	4310011-102	37.292	-121.92	FE	<	100	UG/L	2014-11-03	WATER SUPPLY (WELLS)	DHS	SANTA CLARA	2	SANTA CLARA VALLEY - SANTA CLARA (2-9.02)	28	15
W0604300715	4300715-002	37.147	-121.84	FE		730	UG/L	2014-03-12	WATER SUPPLY (WELLS)	DHS	SANTA CLARA	2	NO BASIN FOUND	29	15
W0604310012	4310012-030	37.321	-121.999	FE	<	100	UG/L	2014-04-02	WATER SUPPLY (WELLS)	DHS	SANTA CLARA	2	SANTA CLARA VALLEY - SANTA CLARA (2-9.02)	25	10
W0604900843	4900843-004	38.306	-122.435	FE		280	UG/L	2014-06-16	WATER SUPPLY (WELLS)	DHS	SONOMA	2	NO BASIN FOUND	4	3
W0604900843	4900843-004	38.306	-122.435	FE	<	100	UG/L	2015-01-12	WATER SUPPLY (WELLS)	DHS	SONOMA	2	NO BASIN FOUND	4	3
W0604900843	4900843-004	38.306	-122.435	FE		390	UG/L	2015-06-08	WATER SUPPLY (WELLS)	DHS	SONOMA	2	NO BASIN FOUND	4	3
W0602801080	2801080-001	38.219	-122.316	FE		2600	UG/L	2014-04-25	WATER SUPPLY (WELLS)	DHS	NAPA	2	NAPA-SONOMA VALLEY - NAPA-SONOMA LOWLANDS (2-2.03)	4	3
W0604100531	4100531-004	37.292	-122.236	FE	<	100	UG/L	2015-01-13	WATER SUPPLY (WELLS)	DHS	SAN MATEO	2	NO BASIN FOUND	24	13
W0602800555	2800555-001	38.567	-122.553	FE		320	UG/L	2016-06-16	WATER SUPPLY (WELLS)	DHS	NAPA	2	NAPA-SONOMA VALLEY - NAPA VALLEY (2-2.01)	4	3
W0604901355	4901355-001	38.335	-122.593	FE		120	UG/L	2014-10-28	WATER SUPPLY (WELLS)	DHS	SONOMA	2	NO BASIN FOUND	10	3
W0600110010	0110010-017	37.698	-121.84	FE	<	0	UG/L	2014-11-13	WATER SUPPLY (WELLS)	DHS	ALAMEDA	2	LIVERMORE VALLEY (2-10)	16	7
W0602110007	2110007-007	38.248	-122.95	FE		7000	UG/L	2016-07-18	WATER SUPPLY (WELLS)	DHS	MARIN	2	WILSON GROVE FORMATION HIGHLANDS (1-59)	10	2
W0600110010	0110010-017	37.698	-121.84	FE		0	UG/L	2015-06-25	WATER SUPPLY (WELLS)	DHS	ALAMEDA	2	LIVERMORE VALLEY (2-10)	16	7
W0604310019	4310019-005	37.408	-121.92	FE		680	UG/L	2015-05-12	WATER SUPPLY (WELLS)	DHS	SANTA CLARA	2	SANTA CLARA VALLEY - SANTA CLARA (2-9.02)	25	10
W0604910006	4910006-055	38.248	-122.633	FE		210	UG/L	2015-07-23	WATER SUPPLY (WELLS)	DHS	SONOMA	2	PETALUMA VALLEY (2-1)	10	3
W0604110028	4110028-002	37.524	-122.514	FE		4000	UG/L	2015-10-19	WATER SUPPLY (WELLS)	DHS	SAN MATEO	2	HALF MOON BAY TERRACE (2-22)	22	13
W0604300740	4300740-001	37.147	-121.959	FE		51	UG/L	2015-10-22	WATER SUPPLY (WELLS)	DHS	SANTA CLARA	2	NO BASIN FOUND	28	15
W0604110009	4110009-007	37.669	-122.435	FE		19.3	UG/L	2013-12-04	WATER SUPPLY (WELLS)	DHS	SAN MATEO	2	WESTSIDE (2-35)	22	13
W0604110009	4110009-006	37.669	-122.435	FE		2.6	UG/L	2013-12-04	WATER SUPPLY (WELLS)	DHS	SAN MATEO	2	WESTSIDE (2-35)	22	13
W0604110009	4110009-007	37.669	-122.435	FE		11.76	UG/L	2014-08-18	WATER SUPPLY (WELLS)	DHS	SAN MATEO	2	WESTSIDE (2-35)	22	13
W0604110010	4110010-015	37.524	-122.514	FE		150	UG/L	2015-08-17	WATER SUPPLY (WELLS)	DHS	SAN MATEO	2	HALF MOON BAY TERRACE (2-22)	22	13
W0604110009	4110009-007	37.669	-122.435	FE		18.11	UG/L	2014-05-05	WATER SUPPLY (WELLS)	DHS	SAN MATEO	2	WESTSIDE (2-35)	22	13
W0604300770	4300770-005	37.35	-121.761	FE	<	0	UG/L	2015-09-23	WATER SUPPLY (WELLS)	DHS	SANTA CLARA	2	NO BASIN FOUND	25	15
W0604300760	4300760-001	37.176	-121.721	FE	<	0	UG/L	2016-03-28	WATER SUPPLY (WELLS)	DHS	SANTA CLARA	2	SANTA CLARA VALLEY - SANTA CLARA (2-9.02)	29	17
W0604110009	4110009-007	37.669	-122.435	FE		5.278	UG/L	2015-03-04	WATER SUPPLY (WELLS)	DHS	SAN MATEO	2	WESTSIDE (2-35)	22	13
W0604110009	4110009-007	37.669	-122.435	FE		12.59	UG/L	2015-08-18	WATER SUPPLY (WELLS)	DHS	SAN MATEO	2	WESTSIDE (2-35)	22	13
W0604310011	4310011-134	37.321	-121.959	FE	<	0	UG/L	2015-06-03	WATER SUPPLY (WELLS)	DHS	SANTA CLARA	2	SANTA CLARA VALLEY - SANTA CLARA (2-9.02)	28	15
W0604310011	4310011-116	37.321	-121.88	FE	<	100	UG/L	2014-12-03	WATER SUPPLY (WELLS)	DHS	SANTA CLARA	2	SANTA CLARA VALLEY - SANTA CLARA (2-9.02)	27	15
T0609592161	IT-MW-81D	38.0647	-122.526	FE	ND	0	UG/L	2014-11-11	ENVIRONMENTAL MONITORING (WELLS)	EDF	MARIN	2	NO BASIN FOUND	10	2
W0604310011	4310011-023	37.321	-121.92	FE	<	50	UG/L	2014-02-04	WATER SUPPLY (WELLS)	DHS	SANTA CLARA	2	SANTA CLARA VALLEY - SANTA CLARA (2-9.02)	28	15
L10006514573	H-5	37.4103	-121.972	FE	=	63	UG/L	2015-03-06	ENVIRONMENTAL MONITORING (WELLS)	EDF	SANTA CLARA	2	SANTA CLARA VALLEY - SANTA CLARA (2-9.02)	25	10
W0604310011	4310011-002	37.321	-121.92	FE	<	100	UG/L	2014-02-04	WATER SUPPLY (WELLS)	DHS	SANTA CLARA	2	SANTA CLARA VALLEY - SANTA CLARA (2-9.02)	28	15
T10000000901	MW2	37.3506	-121.974	FE	=	7340	UG/L	2016-08-23	ENVIRONMENTAL MONITORING (WELLS)	EDF	SANTA CLARA	2	SANTA CLARA VALLEY - SANTA CLARA (2-9.02)	25	10
L10009353957	CW-7	37.9497	-122.38	FE	=	1200	UG/L	2014-11-13	ENVIRONMENTAL MONITORING (WELLS)	EDF	CONTRA COSTA	2	NO BASIN FOUND	15	9
L10009353957	CW-7	37.9497	-122.38	FE	=	6040	UG/L	2015-05-20	ENVIRONMENTAL MONITORING (WELLS)	EDF	CONTRA COSTA	2	NO BASIN FOUND	15	9
T0608164698	MW-8	37.5889	-122.363	FE	=	220	UG/L	2013-12-05	ENVIRONMENTAL MONITORING (WELLS)	EDF	SAN MATEO	2	WESTSIDE (2-35)	22	13
T0608164698	MW-8	37.5889	-122.363	FE	=	18000	UG/L	2013-12-05	ENVIRONMENTAL MONITORING (WELLS)	EDF	SAN MATEO	2	WESTSIDE (2-35)	22	13
T10000003609	CW-7B	37.9537	-122.06	FE	=	8600	UG/L	2015-12-16	ENVIRONMENTAL MONITORING (WELLS)	EDF	CONTRA COSTA	2	YGNACIO VALLEY (2-6)	14	3
T0600101486	MW-3	37.7988	-122.27	FE	=	2600	UG/L	2014-02-06	ENVIRONMENTAL MONITORING (WELLS)	EDF	ALAMEDA	2	SANTA CLARA VALLEY - EAST BAY PLAIN (2-9.04)	18	9
T0600100980	MW-4R	37.766	-122.243	FE	=	1200	UG/L	2015-08-11	ENVIRONMENTAL MONITORING (WELLS)	EDF	ALAMEDA	2	SANTA CLARA VALLEY - EAST BAY PLAIN (2-9.04)	18	9
T0609592162	MW-M12	38.0631	-122.529	FE	ND	0	UG/L	2014-11-11	ENVIRONMENTAL MONITORING (WELLS)	EDF	MARIN	2	NOVATO VALLEY (2-30)	10	2
T0608500255	C-7	37.3205	-121.972	FE	=	182	UG/L	2014-01-31	ENVIRONMENTAL MONITORING (WELLS)	EDF	SANTA CLARA	2	SANTA CLARA VALLEY - SANTA CLARA (2-9.02)	28	15
T0600101803	EW-2	37.7683	-122.24	FE	=	7700	UG/L	2014-10-03	ENVIRONMENTAL MONITORING (WELLS)	EDF	ALAMEDA	2	SANTA CLARA VALLEY - EAST BAY PLAIN (2-9.04)	18	9
L10009353957	GW-31A	37.9539	-122.374	FE	=	520	UG/L	2014-04-24	ENVIRONMENTAL MONITORING (WELLS)	EDF	CONTRA COSTA	2	SANTA CLARA VALLEY - EAST BAY PLAIN (2-9.04)	15	9
T0600101803	EW-2	37.7683	-122.24	FE	ND	0	UG/L	2015-06-18	ENVIRONMENTAL MONITORING (WELLS)	EDF	ALAMEDA	2	SANTA CLARA VALLEY - EAST BAY PLAIN (2-9.04)	18	9
T0601300383	OW-1	37.7767	-121.978	FE	=	35900	UG/L	2015-04-23	ENVIRONMENTAL MONITORING (WELLS)	EDF	CONTRA COSTA	2	SAN RAMON VALLEY (2-7)	16	7
T0600101483	MW-4	37.5269	-122.006	FE	=	11900	UG/L	2015-12-11	ENVIRONMENTAL MONITORING (WELLS)	EDF	ALAMEDA	2	SANTA CLARA VALLEY - NILES CONE (2-9.01)	25	10
T0601300383	MW-9	37.7769	-121.978	FE	=	67300	UG/L	2015-02-16	ENVIRONMENTAL MONITORING (WELLS)	EDF	CONTRA COSTA	2	SAN RAMON VALLEY (2-7)	16	7
T0600101803	MW-4	37.7686	-122.24	FE	=	15000	UG/L	2014-06-19	ENVIRONMENTAL MONITORING (WELLS)	EDF	ALAMEDA	2	SANTA CLARA VALLEY - EAST BAY PLAIN (2-9.04)	18	9
T10000001468	MPMW5-2	37.6279	-122.416	FE	=	120000	UG/L	2014-01-14	ENVIRONMENTAL MONITORING (WELLS)	EDF	SAN MATEO	2	WESTSIDE (2-35)	22	13
T0601300383	MW-13	37.7767	-121.978	FE	=	52000	UG/L	2014-08-21	ENVIRONMENTAL MONITORING (WELLS)	EDF	CONTRA COSTA	2	SAN RAMON VALLEY (2-7)	16	7
T0608100077	MW-14	37.6873	-122.47	FE	=	7790	UG/L	2015-09-16	ENVIRONMENTAL MONITORING (WELLS)	EDF	SAN MATEO	2	WESTSIDE (2-35)	19	11
T10000001468	MPMW3-2	37.6277	-122.416	FE	ND	0	UG/L	2014-01-13	ENVIRONMENTAL MONITORING (WELLS)	EDF	SAN MATEO	2	WESTSIDE (2-35)	22	13
T0601300383	MW-13	37.7767	-121.978	FE	=	43200	UG/L	2015-04-08	ENVIRONMENTAL MONITORING (WELLS)	EDF	CONTRA COSTA	2	SAN RAMON VALLEY (2-7)	16	7
T10000005837	AWR-1	37.5116	-122.256	FE	ND	0	UG/L	2014-10-02	ENVIRONMENTAL MONITORING (WELLS)	EDF	SAN MATEO	2	SANTA CLARA VALLEY - SAN MATEO PLAIN (2-9.03)	22	13
T0601300383	SW-2	37.7766	-121.978	FE	=	61600	UG/L	2015-04-23	ENVIRONMENTAL MONITORING (WELLS)	EDF	CONTRA COSTA	2	SAN RAMON VALLEY (2-7)	16	7
T0600101016	MW-7	37.6157	-122.082	FE	ND	0	UG/L	2014-03-31	ENVIRONMENTAL MONITORING (WELLS)	EDF	ALAMEDA	2	SANTA CLARA VALLEY - EAST BAY PLAIN (2-9.04)	20	10
T0600101516	OW5	37.6933	-122.068	FE	=	67	UG/L	2015-01-27	ENVIRONMENTAL MONITORING (WELLS)	EDF	ALAMEDA	2	CASTRO VALLEY (2-8)	20	10
T0600101410	DW-6	37.6798	-121.777	FE	=	1000	UG/L	2014-06-11	ENVIRONMENTAL MONITORING (WELLS)	EDF	ALAMEDA	2	LIVERMORE VALLEY (2-10)	16	7
T0600101410	DW-6	37.6798	-121.777	FE	=	1300	UG/L	2014-08-14	ENVIRONMENTAL MONITORING (WELLS)	EDF	ALAMEDA	2	LIVERMORE VALLEY (2-10)	16	7
T0608164698	S-2	37.5886	-122.363	FE	ND	0	UG/L	2013-12-06	ENVIRONMENTAL MONITORING (WELLS)	EDF	SAN MATEO	2	WESTSIDE (2-35)	22	13
L10006224883	L-6	37.8746	-122.32	FE	ND	0	UG/L	2016-01-21	ENVIRONMENTAL MONITORING (WELLS)	EDF	NO COUNTY FOUND	2	NO BASIN FOUND	15	9
T0608100661	P-2	37.4947	-122.215	FE	=	4900	UG/L	2014-07-16	ENVIRONMENTAL MONITORING (WELLS)	EDF	SAN MATEO	2	SANTA CLARA VALLEY - SAN MATEO PLAIN (2-9.03)	22	13
T0600101516	C4	37.6933	-122.068	FE	=	7300	UG/L	2015-01-27	ENVIRONMENTAL MONITORING (WELLS)	EDF	ALAMEDA	2	CASTRO VALLEY (2-8)	20	10
T0608100661	MW-6	37.4939	-122.215	FE	=	380	UG/L	2013-12-27	ENVIRONMENTAL MONITORING (WELLS)	EDF	SAN MATEO	2	SANTA CLARA VALLEY - SAN MATEO PLAIN (2-9.03)	22	13
T0608100661	MW-6	37.4939	-122.215	FE	ND	0	UG/L	2014-07-16	ENVIRONMENTAL MONITORING (WELLS)	EDF	SAN MATEO	2	SANTA CLARA VALLEY - SAN MATEO PLAIN (2-9.03)	22	13
T0608100661	MW-6	37.4939	-122.215	FE	ND	0	UG/L	2015-08-28	ENVIRONMENTAL MONITORING (WELLS)	EDF	SAN MATEO	2	SANTA CLARA VALLEY - SAN MATEO PLAIN (2-9.03)	22	13
T0600101410	MW-7	37.6792	-121.776	FE	=	420	UG/L	2014-01-22	ENVIRONMENTAL MONITORING (WELLS)	EDF	ALAMEDA	2	LIVERMORE VALLEY (2-10)	16	7
T0600101410	MW-7	37.6792	-121.776	FE	=	750	UG/L	2014-06-10	ENVIRONMENTAL MONITORING (WELLS)	EDF	ALAMEDA	2	LIVERMORE VALLEY (2-10)	16	7
T0608100147	C-2	37.629	-122.417	FE	=	5900	UG/L	2014-02-12	ENVIRONMENTAL MONITORING (WELLS)	EDF	SAN MATEO	2	WESTSIDE (2-35)	22	13
T0608100147	C-2	37.629	-122.417	FE	=	2600	UG/L	2014-04-29	ENVIRONMENTAL MONITORING (WELLS)	EDF	SAN MATEO	2	WESTSIDE (2-35)	22	13
T0600141337	MW-5R	37.5524	-122.054	FE	=	8900	UG/L	2015-02-11	ENVIRONMENTAL MONITORING (WELLS)	EDF	ALAMEDA	2	SANTA CLARA VALLEY - NILES CONE (2-9.01)	20	10
W0600110003	0110003-010	37.669	-121.801	FE	<	0	UG/L	2015-01-28	WATER SUPPLY (WELLS)	DHS	ALAMEDA	2	LIVERMORE VALLEY (2-10)	16	7
T0600101516	C1	37.6933	-122.068	FE	=	5700	UG/L	2015-01-28	ENVIRONMENTAL MONITORING (WELLS)	EDF	ALAMEDA	2	CASTRO VALLEY (2-8)	20	10
T0601300383	ESE-2	37.7764	-121.978	FE	=	40000	UG/L	2015-02-16	ENVIRONMENTAL MONITORING (WELLS)	EDF	CONTRA COSTA	2	SAN RAMON VALLEY (2-7)	16	7
T0600100939	MW-4	37.7325	-122.202	FE	=	3800	UG/L	2014-08-29	ENVIRONMENTAL MONITORING (WELLS)	EDF	ALAMEDA	2	SANTA CLARA VALLEY - EAST BAY PLAIN (2-9.04)	18	9
L10009353957	GW-78A	37.9476	-122.38	FE	=	209	UG/L	2014-01-28	ENVIRONMENTAL MONITORING (WELLS)	EDF	CONTRA COSTA	2	NO BASIN FOUND	15	9
T10000001468	MPMW7-5	37.6275	-122.416	FE	=	27000	UG/L	2014-04-18	ENVIRONMENTAL MONITORING (WELLS)	EDF	SAN MATEO	2	WESTSIDE (2-35)	22	13
T0600100980	MW-15	37.7661	-122.243	FE	=	54000	UG/L	2014-06-26	ENVIRONMENTAL MONITORING (WELLS)	EDF	ALAMEDA	2	SANTA CLARA VALLEY - EAST BAY PLAIN (2-9.04)	18	9
T0600100980	EW-21	37.7662	-122.243	FE	=	1600	UG/L	2014-06-26	ENVIRONMENTAL MONITORING (WELLS)	EDF	ALAMEDA	2	SANTA CLARA VALLEY - EAST BAY PLAIN (2-9.04)	18	9
T0601300383	SW-4	37.7767	-121.978	FE	=	14200	UG/L	2015-07-21	ENVIRONMENTAL MONITORING (WELLS)	EDF	CONTRA COSTA	2	SAN RAMON VALLEY (2-7)	16	7
L10006514573	G-3R	37.4137	-121.965	FE	ND	0	UG/L	2015-08-14	ENVIRONMENTAL MONITORING (WELLS)	EDF	SANTA CLARA	2	SANTA CLARA VALLEY - SANTA CLARA (2-9.02)	25	10
L10006514573	G-06	37.4145	-121.972	FE	ND	0	UG/L	2015-08-13	ENVIRONMENTAL MONITORING (WELLS)	EDF	SANTA CLARA	2	SANTA CLARA VALLEY - SANTA CLARA (2-9.02)	25	10
L10006514573	G-06	37.4145	-121.972	FE	ND	0	UG/L	2016-09-29	ENVIRONMENTAL MONITORING (WELLS)	EDF	SANTA CLARA	2	SANTA CLARA VALLEY - SANTA CLARA (2-9.02)	25	10
W0600110001	0110001-022	37.553	-121.959	FE	<	100	UG/L	2014-08-05	WATER SUPPLY (WELLS)	DHS	ALAMEDA	2	SANTA CLARA VALLEY - NILES CONE (2-9.01)	20	10
W0600110001	0110001-025	37.553	-121.959	FE	<	100	UG/L	2014-07-28	WATER SUPPLY (WELLS)	DHS	ALAMEDA	2	SANTA CLARA VALLEY - NILES CONE (2-9.01)	20	10
SL0608125065	MW-62	37.4173	-122.207	FE	=	38	UG/L	2015-08-19	ENVIRONMENTAL MONITORING (WELLS)	EDF	SAN MATEO	2	SANTA CLARA VALLEY - SAN MATEO PLAIN (2-9.03)	24	13
T0600100421	MW-7	37.6062	-122.065	FE	=	19000	UG/L	2016-01-06	ENVIRONMENTAL MONITORING (WELLS)	EDF	ALAMEDA	2	SANTA CLARA VALLEY - EAST BAY PLAIN (2-9.04)	20	10
L10009353957	CW-6	37.9514	-122.38	FE	=	1660	UG/L	2014-11-13	ENVIRONMENTAL MONITORING (WELLS)	EDF	CONTRA COSTA	2	NO BASIN FOUND	15	9
L10009353957	CW-6	37.9514	-122.38	FE	ND	0	UG/L	2015-05-20	ENVIRONMENTAL MONITORING (WELLS)	EDF	CONTRA COSTA	2	NO BASIN FOUND	15	9
T10000001468	MPMW3-5	37.6277	-122.416	FE	=	250000	UG/L	2015-05-06	ENVIRONMENTAL MONITORING (WELLS)	EDF	SAN MATEO	2	WESTSIDE (2-35)	22	13
T0608100661	MW-5A	37.4936	-122.215	FE	ND	0	UG/L	2014-12-30	ENVIRONMENTAL MONITORING (WELLS)	EDF	SAN MATEO	2	SANTA CLARA VALLEY - SAN MATEO PLAIN (2-9.03)	22	13
L10006224883	GW-3	37.8715	-122.315	FE	ND	64	UG/L	2016-01-20	ENVIRONMENTAL MONITORING (WELLS)	EDF	NO COUNTY FOUND	2	SANTA CLARA VALLEY - EAST BAY PLAIN (2-9.04)	15	9
L10006224883	GW-3	37.8715	-122.315	FE	ND	0	UG/L	2016-07-18	ENVIRONMENTAL MONITORING (WELLS)	EDF	NO COUNTY FOUND	2	SANTA CLARA VALLEY - EAST BAY PLAIN (2-9.04)	15	9
T0608164698	MW-3	37.5886	-122.363	FE	=	550	UG/L	2013-12-05	ENVIRONMENTAL MONITORING (WELLS)	EDF	SAN MATEO	2	WESTSIDE (2-35)	22	13
T0600101516	OW4	37.6933	-122.068	FE	ND	0	UG/L	2014-10-09	ENVIRONMENTAL MONITORING (WELLS)	EDF	ALAMEDA	2	CASTRO VALLEY (2-8)	20	10
T0600101516	OW4	37.6933	-122.068	FE	=	61	UG/L	2015-01-27	ENVIRONMENTAL MONITORING (WELLS)	EDF	ALAMEDA	2	CASTRO VALLEY (2-8)	20	10
T0608164698	MW-1	37.5888	-122.363	FE	ND	0	UG/L	2013-12-05	ENVIRONMENTAL MONITORING (WELLS)	EDF	SAN MATEO	2	WESTSIDE (2-35)	22	13
SL18244665	GW-8C	37.9424	-122.368	FE	ND	0	UG/L	2015-09-08	ENVIRONMENTAL MONITORING (WELLS)	EDF	CONTRA COSTA	2	SANTA CLARA VALLEY - EAST BAY PLAIN (2-9.04)	15	9
T10000001468	MPMW3-3	37.6277	-122.416	FE	=	86000	UG/L	2015-05-06	ENVIRONMENTAL MONITORING (WELLS)	EDF	SAN MATEO	2	WESTSIDE (2-35)	22	13
T10000001468	MPMW3-3	37.6277	-122.416	FE	=	5500	UG/L	2016-01-14	ENVIRONMENTAL MONITORING (WELLS)	EDF	SAN MATEO	2	WESTSIDE (2-35)	22	13
L10006514573	G-12	37.4114	-121.971	FE	ND	0	UG/L	2015-08-12	ENVIRONMENTAL MONITORING (WELLS)	EDF	SANTA CLARA	2	SANTA CLARA VALLEY - SANTA CLARA (2-9.02)	25	10
T10000003609	CW-8B	37.9538	-122.061	FE	=	1700	UG/L	2016-03-09	ENVIRONMENTAL MONITORING (WELLS)	EDF	CONTRA COSTA	2	YGNACIO VALLEY (2-6)	14	3
SL1823a658	P-12	38.0174	-121.854	FE	=	2050	UG/L	2015-01-05	ENVIRONMENTAL MONITORING (WELLS)	EDF	CONTRA COSTA	2	PITTSBURG PLAIN (2-4)	11	7
SL1823a658	P-12	38.0174	-121.854	FE	=	2400	UG/L	2015-09-23	ENVIRONMENTAL MONITORING (WELLS)	EDF	CONTRA COSTA	2	PITTSBURG PLAIN (2-4)	11	7
T0600101516	OW6	37.6933	-122.068	FE	=	1600	UG/L	2014-10-10	ENVIRONMENTAL MONITORING (WELLS)	EDF	ALAMEDA	2	CASTRO VALLEY (2-8)	20	10
T0600101803	MW-1	37.7684	-122.239	FE	=	22000	UG/L	2014-10-03	ENVIRONMENTAL MONITORING (WELLS)	EDF	ALAMEDA	2	SANTA CLARA VALLEY - EAST BAY PLAIN (2-9.04)	18	9
L10009353957	GW-63C	37.9539	-122.379	FE	ND	166	UG/L	2015-01-27	ENVIRONMENTAL MONITORING (WELLS)	EDF	CONTRA COSTA	2	SANTA CLARA VALLEY - EAST BAY PLAIN (2-9.04)	15	9
T0608100572	MW-29B	37.5526	-122.315	FE	=	2200	UG/L	2014-01-02	ENVIRONMENTAL MONITORING (WELLS)	EDF	SAN MATEO	2	SANTA CLARA VALLEY - SAN MATEO PLAIN (2-9.03)	22	13
T0600100939	MW-10	37.7323	-122.202	FE	=	5600	UG/L	2015-02-05	ENVIRONMENTAL MONITORING (WELLS)	EDF	ALAMEDA	2	SANTA CLARA VALLEY - EAST BAY PLAIN (2-9.04)	18	9
T0600101410	DW-7	37.6798	-121.777	FE	=	630	UG/L	2014-06-11	ENVIRONMENTAL MONITORING (WELLS)	EDF	ALAMEDA	2	LIVERMORE VALLEY (2-10)	16	7
T0600101410	DW-7	37.6798	-121.777	FE	=	490	UG/L	2014-08-14	ENVIRONMENTAL MONITORING (WELLS)	EDF	ALAMEDA	2	LIVERMORE VALLEY (2-10)	16	7
T10000001468	MPMW5-3	37.6279	-122.416	FE	=	36000	UG/L	2016-01-14	ENVIRONMENTAL MONITORING (WELLS)	EDF	SAN MATEO	2	WESTSIDE (2-35)	22	13
T0608100661	MW-2	37.4945	-122.215	FE	=	2700	UG/L	2014-07-16	ENVIRONMENTAL MONITORING (WELLS)	EDF	SAN MATEO	2	SANTA CLARA VALLEY - SAN MATEO PLAIN (2-9.03)	22	13
T0608100661	MW-2	37.4945	-122.215	FE	=	2900	UG/L	2015-04-01	ENVIRONMENTAL MONITORING (WELLS)	EDF	SAN MATEO	2	SANTA CLARA VALLEY - SAN MATEO PLAIN (2-9.03)	22	13
SL1823a658	P-20	38.0175	-121.854	FE	=	714000	UG/L	2015-01-05	ENVIRONMENTAL MONITORING (WELLS)	EDF	CONTRA COSTA	2	PITTSBURG PLAIN (2-4)	11	7
SL18244665	GW-26C	37.9422	-122.375	FE	=	292	UG/L	2015-10-01	ENVIRONMENTAL MONITORING (WELLS)	EDF	CONTRA COSTA	2	SANTA CLARA VALLEY - EAST BAY PLAIN (2-9.04)	15	9
T0601300383	SW-3	37.7767	-121.978	FE	=	7680	UG/L	2015-07-20	ENVIRONMENTAL MONITORING (WELLS)	EDF	CONTRA COSTA	2	SAN RAMON VALLEY (2-7)	16	7
T10000003609	CW-12A	37.9526	-122.06	FE	=	180	UG/L	2015-12-16	ENVIRONMENTAL MONITORING (WELLS)	EDF	CONTRA COSTA	2	YGNACIO VALLEY (2-6)	14	3
T0600101016	MW-6	37.6153	-122.082	FE	=	2400	UG/L	2015-10-02	ENVIRONMENTAL MONITORING (WELLS)	EDF	ALAMEDA	2	SANTA CLARA VALLEY - EAST BAY PLAIN (2-9.04)	20	10
T0601300383	ESE-3	37.7766	-121.978	FE	=	81000	UG/L	2014-08-21	ENVIRONMENTAL MONITORING (WELLS)	EDF	CONTRA COSTA	2	SAN RAMON VALLEY (2-7)	16	7
T0601300383	ESE-3	37.7766	-121.978	FE	=	16400	UG/L	2015-04-08	ENVIRONMENTAL MONITORING (WELLS)	EDF	CONTRA COSTA	2	SAN RAMON VALLEY (2-7)	16	7
T0600100980	MW-7R	37.7661	-122.243	FE	=	35000	UG/L	2014-06-25	ENVIRONMENTAL MONITORING (WELLS)	EDF	ALAMEDA	2	SANTA CLARA VALLEY - EAST BAY PLAIN (2-9.04)	18	9
T0608500710	MW-33	37.3489	-121.893	FE	ND	0	UG/L	2014-07-29	ENVIRONMENTAL MONITORING (WELLS)	EDF	SANTA CLARA	2	SANTA CLARA VALLEY - SANTA CLARA (2-9.02)	27	15
T0609700788	MW-15D	38.2357	-122.461	FE	=	17000	UG/L	2015-02-26	ENVIRONMENTAL MONITORING (WELLS)	EDF	SONOMA	2	NAPA-SONOMA VALLEY - SONOMA VALLEY (2-2.02)	10	3
T0609592161	MW-M20D	38.0593	-122.527	FE	=	930	UG/L	2014-11-12	ENVIRONMENTAL MONITORING (WELLS)	EDF	MARIN	2	NOVATO VALLEY (2-30)	10	2
T0600101016	MW-16	37.6153	-122.082	FE	=	4800	UG/L	2014-09-11	ENVIRONMENTAL MONITORING (WELLS)	EDF	ALAMEDA	2	SANTA CLARA VALLEY - EAST BAY PLAIN (2-9.04)	20	10
W0604310011	4310011-103	37.292	-121.92	FE	<	100	UG/L	2014-09-04	WATER SUPPLY (WELLS)	DHS	SANTA CLARA	2	SANTA CLARA VALLEY - SANTA CLARA (2-9.02)	28	15
W0604310001	4310001-018	37.35	-122.038	FE		180	UG/L	2015-05-13	WATER SUPPLY (WELLS)	DHS	SANTA CLARA	2	SANTA CLARA VALLEY - SANTA CLARA (2-9.02)	24	13
W0604310011	4310011-121	37.292	-121.959	FE	<	100	UG/L	2014-07-15	WATER SUPPLY (WELLS)	DHS	SANTA CLARA	2	SANTA CLARA VALLEY - SANTA CLARA (2-9.02)	28	15
W0604310012	4310012-013	37.35	-121.999	FE	<	100	UG/L	2015-08-24	WATER SUPPLY (WELLS)	DHS	SANTA CLARA	2	SANTA CLARA VALLEY - SANTA CLARA (2-9.02)	25	10
W0604310011	4310011-013	37.263	-121.88	FE		140	UG/L	2015-11-19	WATER SUPPLY (WELLS)	DHS	SANTA CLARA	2	SANTA CLARA VALLEY - SANTA CLARA (2-9.02)	28	15
W0604310011	4310011-013	37.263	-121.88	FE		160	UG/L	2015-12-14	WATER SUPPLY (WELLS)	DHS	SANTA CLARA	2	SANTA CLARA VALLEY - SANTA CLARA (2-9.02)	28	15
W0604310014	4310014-012	37.35	-122.038	FE	<	0	UG/L	2015-02-11	WATER SUPPLY (WELLS)	DHS	SANTA CLARA	2	SANTA CLARA VALLEY - SANTA CLARA (2-9.02)	24	13
W0604300986	4300986-001	37.176	-121.761	FE	<	100	UG/L	2014-06-10	WATER SUPPLY (WELLS)	DHS	SANTA CLARA	2	NO BASIN FOUND	29	17
W0604300986	4300986-001	37.176	-121.761	FE		270	UG/L	2015-12-08	WATER SUPPLY (WELLS)	DHS	SANTA CLARA	2	NO BASIN FOUND	29	17
W0604310011	4310011-068	37.292	-121.88	FE	<	100	UG/L	2014-12-02	WATER SUPPLY (WELLS)	DHS	SANTA CLARA	2	SANTA CLARA VALLEY - SANTA CLARA (2-9.02)	27	15
W0604900875	4900875-001	38.422	-122.553	FE		0.16	UG/L	2014-05-19	WATER SUPPLY (WELLS)	DHS	SONOMA	2	NO BASIN FOUND	4	2
W0604310020	4310020-007	37.263	-121.801	FE		210	UG/L	2014-08-05	WATER SUPPLY (WELLS)	DHS	SANTA CLARA	2	SANTA CLARA VALLEY - SANTA CLARA (2-9.02)	27	17
W0604310020	4310020-011	37.205	-121.721	FE	<	0	UG/L	2016-07-19	WATER SUPPLY (WELLS)	DHS	SANTA CLARA	2	SANTA CLARA VALLEY - SANTA CLARA (2-9.02)	29	17
W0604110020	4110020-006	37.466	-122.157	FE		120	UG/L	2014-09-16	WATER SUPPLY (WELLS)	DHS	SAN MATEO	2	SANTA CLARA VALLEY - SAN MATEO PLAIN (2-9.03)	24	13
W0604110020	4110020-006	37.466	-122.157	FE		360	UG/L	2016-07-19	WATER SUPPLY (WELLS)	DHS	SAN MATEO	2	SANTA CLARA VALLEY - SAN MATEO PLAIN (2-9.03)	24	13
W0604100555	4100555-001	37.263	-122.197	FE	<	0	UG/L	2015-08-20	WATER SUPPLY (WELLS)	DHS	SAN MATEO	2	NO BASIN FOUND	24	13
W0602801010	2801010-001	38.422	-122.395	FE		800	UG/L	2014-04-17	WATER SUPPLY (WELLS)	DHS	NAPA	2	NAPA-SONOMA VALLEY - NAPA VALLEY (2-2.01)	4	3
W0604100538	4100538-004	37.292	-122.276	FE		810	UG/L	2014-06-02	WATER SUPPLY (WELLS)	DHS	SAN MATEO	2	NO BASIN FOUND	24	13
W0604100582	4100582-001	37.234	-122.395	FE	<	0	UG/L	2015-07-15	WATER SUPPLY (WELLS)	DHS	SAN MATEO	2	NO BASIN FOUND	24	13
SL0608125065	MW-87	37.417	-122.207	FE	ND	0	UG/L	2016-08-17	ENVIRONMENTAL MONITORING (WELLS)	EDF	SAN MATEO	2	SANTA CLARA VALLEY - SAN MATEO PLAIN (2-9.03)	24	13
SL720501209	MW-029	37.4134	-122.147	FE	ND	0	UG/L	2015-08-05	ENVIRONMENTAL MONITORING (WELLS)	EDF	SANTA CLARA	2	SANTA CLARA VALLEY - SANTA CLARA (2-9.02)	24	13
SL1821Y617	MW-12	37.4328	-122.099	FE	=	410	UG/L	2014-12-19	ENVIRONMENTAL MONITORING (WELLS)	EDF	SANTA CLARA	2	SANTA CLARA VALLEY - SANTA CLARA (2-9.02)	24	13
SL18244665	GW-10C	37.9457	-122.372	FE	ND	48.6	UG/L	2014-09-29	ENVIRONMENTAL MONITORING (WELLS)	EDF	CONTRA COSTA	2	SANTA CLARA VALLEY - EAST BAY PLAIN (2-9.04)	15	9
T10000001468	MPMW3-4	37.6277	-122.416	FE	ND	0	UG/L	2014-01-13	ENVIRONMENTAL MONITORING (WELLS)	EDF	SAN MATEO	2	WESTSIDE (2-35)	22	13
T10000001468	MPMW3-4	37.6277	-122.416	FE	=	690000	UG/L	2014-10-15	ENVIRONMENTAL MONITORING (WELLS)	EDF	SAN MATEO	2	WESTSIDE (2-35)	22	13
L10006514573	G-10	37.4111	-121.972	FE	ND	0	UG/L	2015-03-06	ENVIRONMENTAL MONITORING (WELLS)	EDF	SANTA CLARA	2	SANTA CLARA VALLEY - SANTA CLARA (2-9.02)	25	10
L10006514573	H-6	37.4114	-121.971	FE	ND	0	UG/L	2014-07-18	ENVIRONMENTAL MONITORING (WELLS)	EDF	SANTA CLARA	2	SANTA CLARA VALLEY - SANTA CLARA (2-9.02)	25	10
T0609700943	MW-5	38.2493	-122.626	FE	=	9700	UG/L	2014-06-18	ENVIRONMENTAL MONITORING (WELLS)	EDF	SONOMA	2	PETALUMA VALLEY (2-1)	10	3
SL1821Y617	MW-17	37.4336	-122.099	FE	ND	0	UG/L	2014-12-18	ENVIRONMENTAL MONITORING (WELLS)	EDF	SANTA CLARA	2	SANTA CLARA VALLEY - SANTA CLARA (2-9.02)	24	13
SL18244665	GW-23C	37.9423	-122.375	FE	=	270	UG/L	2014-09-29	ENVIRONMENTAL MONITORING (WELLS)	EDF	CONTRA COSTA	2	SANTA CLARA VALLEY - EAST BAY PLAIN (2-9.04)	15	9
T0608509697	MW-12	37.2913	-121.992	FE	=	46	UG/L	2014-05-22	ENVIRONMENTAL MONITORING (WELLS)	EDF	SANTA CLARA	2	SANTA CLARA VALLEY - SANTA CLARA (2-9.02)	28	15
T0608500710	MW-27	37.3482	-121.892	FE	ND	0	UG/L	2014-10-06	ENVIRONMENTAL MONITORING (WELLS)	EDF	SANTA CLARA	2	SANTA CLARA VALLEY - SANTA CLARA (2-9.02)	27	15
L10009353957	GW-3A-2	37.9514	-122.38	FE	=	1860	UG/L	2014-07-22	ENVIRONMENTAL MONITORING (WELLS)	EDF	CONTRA COSTA	2	NO BASIN FOUND	15	9
T10000005837	AWR-3	37.5113	-122.255	FE	ND	0	UG/L	2014-10-02	ENVIRONMENTAL MONITORING (WELLS)	EDF	SAN MATEO	2	SANTA CLARA VALLEY - SAN MATEO PLAIN (2-9.03)	22	13
T0600141337	MW-4	37.5523	-122.054	FE	=	11000	UG/L	2015-02-11	ENVIRONMENTAL MONITORING (WELLS)	EDF	ALAMEDA	2	SANTA CLARA VALLEY - NILES CONE (2-9.01)	20	10
T0608100077	MW-8	37.6864	-122.47	FE	=	10000	UG/L	2014-11-07	ENVIRONMENTAL MONITORING (WELLS)	EDF	SAN MATEO	2	WESTSIDE (2-35)	19	11
T0609700943	MW-6	38.2492	-122.626	FE	=	7000	UG/L	2014-06-18	ENVIRONMENTAL MONITORING (WELLS)	EDF	SONOMA	2	PETALUMA VALLEY (2-1)	10	3
T0600100939	IW-3	37.7328	-122.201	FE	=	28000	UG/L	2015-02-05	ENVIRONMENTAL MONITORING (WELLS)	EDF	ALAMEDA	2	SANTA CLARA VALLEY - EAST BAY PLAIN (2-9.04)	18	9
T0608100147	C-13	37.6289	-122.417	FE	=	600	UG/L	2015-06-18	ENVIRONMENTAL MONITORING (WELLS)	EDF	SAN MATEO	2	WESTSIDE (2-35)	22	13
L10006514573	G-07	37.4152	-121.973	FE	ND	0	UG/L	2014-07-14	ENVIRONMENTAL MONITORING (WELLS)	EDF	SANTA CLARA	2	SANTA CLARA VALLEY - SANTA CLARA (2-9.02)	25	10
L10006514573	G-07	37.4152	-121.973	FE	ND	0	UG/L	2015-03-05	ENVIRONMENTAL MONITORING (WELLS)	EDF	SANTA CLARA	2	SANTA CLARA VALLEY - SANTA CLARA (2-9.02)	25	10
L10009353957	GW-3C-1	37.9513	-122.38	FE	=	262	UG/L	2014-05-14	ENVIRONMENTAL MONITORING (WELLS)	EDF	CONTRA COSTA	2	NO BASIN FOUND	15	9
L10009353957	GW-3C-1	37.9513	-122.38	FE	=	209	UG/L	2014-07-16	ENVIRONMENTAL MONITORING (WELLS)	EDF	CONTRA COSTA	2	NO BASIN FOUND	15	9
L10009353957	GW-3C-1	37.9513	-122.38	FE	ND	195	UG/L	2014-07-16	ENVIRONMENTAL MONITORING (WELLS)	EDF	CONTRA COSTA	2	NO BASIN FOUND	15	9
L10009353957	GW-3C-1	37.9513	-122.38	FE	ND	160	UG/L	2015-01-29	ENVIRONMENTAL MONITORING (WELLS)	EDF	CONTRA COSTA	2	NO BASIN FOUND	15	9
L10009353957	GW-3C-1	37.9513	-122.38	FE	ND	182	UG/L	2015-10-27	ENVIRONMENTAL MONITORING (WELLS)	EDF	CONTRA COSTA	2	NO BASIN FOUND	15	9
T0608100572	MW-9	37.5523	-122.315	FE	=	1800	UG/L	2014-01-02	ENVIRONMENTAL MONITORING (WELLS)	EDF	SAN MATEO	2	SANTA CLARA VALLEY - SAN MATEO PLAIN (2-9.03)	22	13
T10000004547	MW-3B	37.2209	-121.977	FE	=	11000	UG/L	2015-04-09	ENVIRONMENTAL MONITORING (WELLS)	EDF	SANTA CLARA	2	SANTA CLARA VALLEY - SANTA CLARA (2-9.02)	28	15
T10000004547	MW-3B	37.2209	-121.977	FE	=	45000	UG/L	2015-04-09	ENVIRONMENTAL MONITORING (WELLS)	EDF	SANTA CLARA	2	SANTA CLARA VALLEY - SANTA CLARA (2-9.02)	28	15
T0600101410	IP-1	37.6793	-121.776	FE	=	270	UG/L	2014-01-22	ENVIRONMENTAL MONITORING (WELLS)	EDF	ALAMEDA	2	LIVERMORE VALLEY (2-10)	16	7
T10000001468	MPMW5-4	37.6279	-122.416	FE	=	8800	UG/L	2015-05-07	ENVIRONMENTAL MONITORING (WELLS)	EDF	SAN MATEO	2	WESTSIDE (2-35)	22	13
SL0600100443	MW-4	37.5506	-121.858	FE	ND	0	UG/L	2014-03-20	ENVIRONMENTAL MONITORING (WELLS)	EDF	ALAMEDA	2	NO BASIN FOUND	20	7
T0609592162	IT-PZ-9	38.0626	-122.526	FE	ND	0	UG/L	2014-11-13	ENVIRONMENTAL MONITORING (WELLS)	EDF	MARIN	2	NOVATO VALLEY (2-30)	10	2
SL1823F1131	GTA-4	37.3881	-121.942	FE	=	9280	UG/L	2015-09-29	ENVIRONMENTAL MONITORING (WELLS)	EDF	SANTA CLARA	2	SANTA CLARA VALLEY - SANTA CLARA (2-9.02)	25	10
T10000004547	MW-4B	37.2207	-121.977	FE	=	47000	UG/L	2015-04-09	ENVIRONMENTAL MONITORING (WELLS)	EDF	SANTA CLARA	2	SANTA CLARA VALLEY - SANTA CLARA (2-9.02)	28	15
SL18244665	GW-20A	37.9422	-122.371	FE	=	1920	UG/L	2014-09-18	ENVIRONMENTAL MONITORING (WELLS)	EDF	CONTRA COSTA	2	SANTA CLARA VALLEY - EAST BAY PLAIN (2-9.04)	15	9
T0608500710	MW-31	37.3489	-121.893	FE	ND	0	UG/L	2015-12-02	ENVIRONMENTAL MONITORING (WELLS)	EDF	SANTA CLARA	2	SANTA CLARA VALLEY - SANTA CLARA (2-9.02)	27	15
T10000000901	MW11A	37.3508	-121.975	FE	=	2320	UG/L	2016-08-23	ENVIRONMENTAL MONITORING (WELLS)	EDF	SANTA CLARA	2	SANTA CLARA VALLEY - SANTA CLARA (2-9.02)	25	10
T0608164698	S-1	37.5886	-122.363	FE	=	1500	UG/L	2014-03-12	ENVIRONMENTAL MONITORING (WELLS)	EDF	SAN MATEO	2	WESTSIDE (2-35)	22	13
T0600100421	MW-17	37.6064	-122.065	FE	ND	0	UG/L	2016-04-14	ENVIRONMENTAL MONITORING (WELLS)	EDF	ALAMEDA	2	SANTA CLARA VALLEY - EAST BAY PLAIN (2-9.04)	20	10
T10000003609	CW-8A	37.9538	-122.061	FE	=	10000	UG/L	2016-03-09	ENVIRONMENTAL MONITORING (WELLS)	EDF	CONTRA COSTA	2	YGNACIO VALLEY (2-6)	14	3
L10006514573	G-4R	37.417	-121.968	FE	ND	0	UG/L	2014-02-26	ENVIRONMENTAL MONITORING (WELLS)	EDF	SANTA CLARA	2	SANTA CLARA VALLEY - SANTA CLARA (2-9.02)	25	10
L10006514573	G-4R	37.417	-121.968	FE	ND	0	UG/L	2014-07-14	ENVIRONMENTAL MONITORING (WELLS)	EDF	SANTA CLARA	2	SANTA CLARA VALLEY - SANTA CLARA (2-9.02)	25	10
L10006514573	G-4R	37.417	-121.968	FE	ND	0	UG/L	2015-08-14	ENVIRONMENTAL MONITORING (WELLS)	EDF	SANTA CLARA	2	SANTA CLARA VALLEY - SANTA CLARA (2-9.02)	25	10
L10009353957	GW-77A	37.95	-122.38	FE	=	77400	UG/L	2014-04-30	ENVIRONMENTAL MONITORING (WELLS)	EDF	CONTRA COSTA	2	NO BASIN FOUND	15	9
L10009353957	GW-77A	37.95	-122.38	FE	=	98600	UG/L	2015-04-29	ENVIRONMENTAL MONITORING (WELLS)	EDF	CONTRA COSTA	2	NO BASIN FOUND	15	9
L10009353957	GW-77A	37.95	-122.38	FE	=	117000	UG/L	2015-10-21	ENVIRONMENTAL MONITORING (WELLS)	EDF	CONTRA COSTA	2	NO BASIN FOUND	15	9
T0608553115	MW-5A	37.3633	-121.828	FE	=	12.9	UG/L	2016-06-10	ENVIRONMENTAL MONITORING (WELLS)	EDF	SANTA CLARA	2	SANTA CLARA VALLEY - SANTA CLARA (2-9.02)	27	15
T0608500255	C-1	37.3205	-121.972	FE	ND	0	UG/L	2014-08-20	ENVIRONMENTAL MONITORING (WELLS)	EDF	SANTA CLARA	2	SANTA CLARA VALLEY - SANTA CLARA (2-9.02)	28	15
T0608100572	MW-26B	37.5527	-122.315	FE	=	2900	UG/L	2014-01-02	ENVIRONMENTAL MONITORING (WELLS)	EDF	SAN MATEO	2	SANTA CLARA VALLEY - SAN MATEO PLAIN (2-9.03)	22	13
L10009353957	CW-9	37.9445	-122.376	FE	=	23700	UG/L	2014-05-28	ENVIRONMENTAL MONITORING (WELLS)	EDF	CONTRA COSTA	2	SANTA CLARA VALLEY - EAST BAY PLAIN (2-9.04)	15	9
L10009353957	CW-9	37.9445	-122.376	FE	=	5270	UG/L	2014-02-19	ENVIRONMENTAL MONITORING (WELLS)	EDF	CONTRA COSTA	2	SANTA CLARA VALLEY - EAST BAY PLAIN (2-9.04)	15	9
L10009353957	CW-9	37.9445	-122.376	FE	=	1990	UG/L	2014-11-13	ENVIRONMENTAL MONITORING (WELLS)	EDF	CONTRA COSTA	2	SANTA CLARA VALLEY - EAST BAY PLAIN (2-9.04)	15	9
T0600100980	MW-10	37.7662	-122.243	FE	=	43000	UG/L	2015-11-10	ENVIRONMENTAL MONITORING (WELLS)	EDF	ALAMEDA	2	SANTA CLARA VALLEY - EAST BAY PLAIN (2-9.04)	18	9
L10006514573	G-18	37.4113	-121.972	FE	ND	0	UG/L	2014-02-27	ENVIRONMENTAL MONITORING (WELLS)	EDF	SANTA CLARA	2	SANTA CLARA VALLEY - SANTA CLARA (2-9.02)	25	10
T0600100421	MW-6R	37.6062	-122.064	FE	ND	0	UG/L	2016-04-14	ENVIRONMENTAL MONITORING (WELLS)	EDF	ALAMEDA	2	SANTA CLARA VALLEY - EAST BAY PLAIN (2-9.04)	20	10
T0609700943	MW-9	38.2485	-122.626	FE	=	41000	UG/L	2013-12-13	ENVIRONMENTAL MONITORING (WELLS)	EDF	SONOMA	2	PETALUMA VALLEY (2-1)	10	3
T10000001468	MPMW6-5	37.6278	-122.416	FE	=	7700	UG/L	2014-04-16	ENVIRONMENTAL MONITORING (WELLS)	EDF	SAN MATEO	2	WESTSIDE (2-35)	22	13
T10000001468	MPMW6-5	37.6278	-122.416	FE	ND	0	UG/L	2015-07-21	ENVIRONMENTAL MONITORING (WELLS)	EDF	SAN MATEO	2	WESTSIDE (2-35)	22	13
T10000000901	MW11	37.3508	-121.975	FE	=	5530	UG/L	2016-02-25	ENVIRONMENTAL MONITORING (WELLS)	EDF	SANTA CLARA	2	SANTA CLARA VALLEY - SANTA CLARA (2-9.02)	25	10
T10000000901	MW11	37.3508	-121.975	FE	=	2410	UG/L	2016-08-23	ENVIRONMENTAL MONITORING (WELLS)	EDF	SANTA CLARA	2	SANTA CLARA VALLEY - SANTA CLARA (2-9.02)	25	10
T0608100572	MW-27B	37.5525	-122.315	FE	=	8900	UG/L	2014-01-02	ENVIRONMENTAL MONITORING (WELLS)	EDF	SAN MATEO	2	SANTA CLARA VALLEY - SAN MATEO PLAIN (2-9.03)	22	13
T10000000901	MW3	37.3515	-121.974	FE	=	925	UG/L	2013-12-30	ENVIRONMENTAL MONITORING (WELLS)	EDF	SANTA CLARA	2	SANTA CLARA VALLEY - SANTA CLARA (2-9.02)	25	10
T10000000901	MW3	37.3515	-121.974	FE	=	1.53	UG/L	2014-05-28	ENVIRONMENTAL MONITORING (WELLS)	EDF	SANTA CLARA	2	SANTA CLARA VALLEY - SANTA CLARA (2-9.02)	25	10
T10000000901	MW3	37.3515	-121.974	FE	=	4.89	UG/L	2014-11-25	ENVIRONMENTAL MONITORING (WELLS)	EDF	SANTA CLARA	2	SANTA CLARA VALLEY - SANTA CLARA (2-9.02)	25	10
T10000000901	MW3	37.3515	-121.974	FE	=	393	UG/L	2015-02-24	ENVIRONMENTAL MONITORING (WELLS)	EDF	SANTA CLARA	2	SANTA CLARA VALLEY - SANTA CLARA (2-9.02)	25	10
T10000000901	MW3	37.3515	-121.974	FE	=	20.9	UG/L	2015-06-04	ENVIRONMENTAL MONITORING (WELLS)	EDF	SANTA CLARA	2	SANTA CLARA VALLEY - SANTA CLARA (2-9.02)	25	10
SL18244665	GW-7C	37.944	-122.367	FE	ND	0	UG/L	2014-09-25	ENVIRONMENTAL MONITORING (WELLS)	EDF	CONTRA COSTA	2	SANTA CLARA VALLEY - EAST BAY PLAIN (2-9.04)	15	9
SL18244665	GW-7C	37.944	-122.367	FE	ND	0	UG/L	2015-09-08	ENVIRONMENTAL MONITORING (WELLS)	EDF	CONTRA COSTA	2	SANTA CLARA VALLEY - EAST BAY PLAIN (2-9.04)	15	9
L10006514573	G-05	37.4167	-121.971	FE	ND	0	UG/L	2015-03-05	ENVIRONMENTAL MONITORING (WELLS)	EDF	SANTA CLARA	2	SANTA CLARA VALLEY - SANTA CLARA (2-9.02)	25	10
T10000001468	MPMW6-4	37.6278	-122.416	FE	=	7100	UG/L	2014-04-16	ENVIRONMENTAL MONITORING (WELLS)	EDF	SAN MATEO	2	WESTSIDE (2-35)	22	13
T10000001468	MPMW6-4	37.6278	-122.416	FE	ND	0	UG/L	2014-10-14	ENVIRONMENTAL MONITORING (WELLS)	EDF	SAN MATEO	2	WESTSIDE (2-35)	22	13
SL0608125065	MW-21	37.4174	-122.206	FE	=	59	UG/L	2014-08-20	ENVIRONMENTAL MONITORING (WELLS)	EDF	SAN MATEO	2	SANTA CLARA VALLEY - SAN MATEO PLAIN (2-9.03)	24	13
T0600101866	MW-10	37.8074	-122.314	FE	=	13000	UG/L	2013-12-13	ENVIRONMENTAL MONITORING (WELLS)	EDF	ALAMEDA	2	SANTA CLARA VALLEY - EAST BAY PLAIN (2-9.04)	18	9
T0600101486	MW-4	37.7988	-122.27	FE	=	480	UG/L	2014-02-06	ENVIRONMENTAL MONITORING (WELLS)	EDF	ALAMEDA	2	SANTA CLARA VALLEY - EAST BAY PLAIN (2-9.04)	18	9
T0608500710	MW-18	37.3486	-121.893	FE	=	120	UG/L	2014-04-30	ENVIRONMENTAL MONITORING (WELLS)	EDF	SANTA CLARA	2	SANTA CLARA VALLEY - SANTA CLARA (2-9.02)	27	15
T10000000901	MW4	37.3518	-121.974	FE	=	566	UG/L	2014-05-28	ENVIRONMENTAL MONITORING (WELLS)	EDF	SANTA CLARA	2	SANTA CLARA VALLEY - SANTA CLARA (2-9.02)	25	10
T10000000901	MW4	37.3518	-121.974	FE	=	526	UG/L	2014-11-25	ENVIRONMENTAL MONITORING (WELLS)	EDF	SANTA CLARA	2	SANTA CLARA VALLEY - SANTA CLARA (2-9.02)	25	10
W0602800625	2800625-005	38.567	-122.474	FE	<	100	UG/L	2013-12-18	WATER SUPPLY (WELLS)	DHS	NAPA	2	NO BASIN FOUND	4	3
W0604310011	4310011-014	37.263	-121.88	FE	<	0	UG/L	2016-03-10	WATER SUPPLY (WELLS)	DHS	SANTA CLARA	2	SANTA CLARA VALLEY - SANTA CLARA (2-9.02)	28	15
W0604110020	4110020-003	37.466	-122.157	FE	<	0	UG/L	2015-06-09	WATER SUPPLY (WELLS)	DHS	SAN MATEO	2	SANTA CLARA VALLEY - SAN MATEO PLAIN (2-9.03)	24	13
W0602800625	2800625-003	38.538	-122.474	FE	<	100	UG/L	2014-03-19	WATER SUPPLY (WELLS)	DHS	NAPA	2	NO BASIN FOUND	4	3
W0602800625	2800625-003	38.538	-122.474	FE	<	100	UG/L	2015-09-29	WATER SUPPLY (WELLS)	DHS	NAPA	2	NO BASIN FOUND	4	3
W0602810004	2810004-007	38.509	-122.435	FE		1100	UG/L	2015-05-06	WATER SUPPLY (WELLS)	DHS	NAPA	2	NO BASIN FOUND	4	3
W0604310001	4310001-024	37.379	-122.118	FE	<	0	UG/L	2016-06-15	WATER SUPPLY (WELLS)	DHS	SANTA CLARA	2	SANTA CLARA VALLEY - SANTA CLARA (2-9.02)	24	13
W0604310011	4310011-052	37.379	-121.92	FE	<	100	UG/L	2014-05-02	WATER SUPPLY (WELLS)	DHS	SANTA CLARA	2	SANTA CLARA VALLEY - SANTA CLARA (2-9.02)	25	10
W0604310011	4310011-130	37.321	-121.959	FE	<	100	UG/L	2015-02-23	WATER SUPPLY (WELLS)	DHS	SANTA CLARA	2	SANTA CLARA VALLEY - SANTA CLARA (2-9.02)	28	15
W0600110003	0110003-014	37.669	-121.801	FE		23.29	UG/L	2015-02-24	WATER SUPPLY (WELLS)	DHS	ALAMEDA	2	LIVERMORE VALLEY (2-10)	16	7
W0602110007	2110007-005	38.248	-122.95	FE	<	0	UG/L	2014-06-09	WATER SUPPLY (WELLS)	DHS	MARIN	2	NO BASIN FOUND	10	2
W0602110007	2110007-005	38.248	-122.95	FE	<	0	UG/L	2016-06-16	WATER SUPPLY (WELLS)	DHS	MARIN	2	NO BASIN FOUND	10	2
W0602110007	2110007-001	38.248	-122.95	FE		1.611	UG/L	2014-01-21	WATER SUPPLY (WELLS)	DHS	MARIN	2	NO BASIN FOUND	10	2
W0602110007	2110007-001	38.248	-122.95	FE		1.152	UG/L	2014-08-12	WATER SUPPLY (WELLS)	DHS	MARIN	2	NO BASIN FOUND	10	2
W0602110007	2110007-001	38.248	-122.95	FE	<	0	UG/L	2014-06-17	WATER SUPPLY (WELLS)	DHS	MARIN	2	NO BASIN FOUND	10	2
W0604310011	4310011-027	37.321	-121.92	FE	<	0	UG/L	2016-01-19	WATER SUPPLY (WELLS)	DHS	SANTA CLARA	2	SANTA CLARA VALLEY - SANTA CLARA (2-9.02)	28	15
W0602110007	2110007-001	38.248	-122.95	FE		5.098	UG/L	2014-12-09	WATER SUPPLY (WELLS)	DHS	MARIN	2	NO BASIN FOUND	10	2
W0602110007	2110007-001	38.248	-122.95	FE	<	0	UG/L	2015-10-20	WATER SUPPLY (WELLS)	DHS	MARIN	2	NO BASIN FOUND	10	2
W0602110007	2110007-001	38.248	-122.95	FE		5.028	UG/L	2015-05-19	WATER SUPPLY (WELLS)	DHS	MARIN	2	NO BASIN FOUND	10	2
W0602110007	2110007-001	38.248	-122.95	FE	<	0	UG/L	2015-11-17	WATER SUPPLY (WELLS)	DHS	MARIN	2	NO BASIN FOUND	10	2
W0604310011	4310011-156	37.321	-121.88	FE		180	UG/L	2015-08-26	WATER SUPPLY (WELLS)	DHS	SANTA CLARA	2	SANTA CLARA VALLEY - SANTA CLARA (2-9.02)	27	15
W0604310011	4310011-132	37.321	-121.959	FE		2600	UG/L	2016-03-10	WATER SUPPLY (WELLS)	DHS	SANTA CLARA	2	SANTA CLARA VALLEY - SANTA CLARA (2-9.02)	28	15
W0604310011	4310011-132	37.321	-121.959	FE	<	0	UG/L	2016-05-17	WATER SUPPLY (WELLS)	DHS	SANTA CLARA	2	SANTA CLARA VALLEY - SANTA CLARA (2-9.02)	28	15
W0604910006	4910006-057	38.248	-122.633	FE		110	UG/L	2015-02-12	WATER SUPPLY (WELLS)	DHS	SONOMA	2	PETALUMA VALLEY (2-1)	10	3
W0604110028	4110028-004	37.524	-122.514	FE		4400	UG/L	2015-04-20	WATER SUPPLY (WELLS)	DHS	SAN MATEO	2	HALF MOON BAY TERRACE (2-22)	22	13
W0604110028	4110028-004	37.524	-122.514	FE		4000	UG/L	2015-10-19	WATER SUPPLY (WELLS)	DHS	SAN MATEO	2	HALF MOON BAY TERRACE (2-22)	22	13
T0608500710	MW-19	37.3487	-121.893	FE	ND	0	UG/L	2014-07-29	ENVIRONMENTAL MONITORING (WELLS)	EDF	SANTA CLARA	2	SANTA CLARA VALLEY - SANTA CLARA (2-9.02)	27	15
T0600101803	EW-4	37.7685	-122.239	FE	=	28000	UG/L	2014-10-03	ENVIRONMENTAL MONITORING (WELLS)	EDF	ALAMEDA	2	SANTA CLARA VALLEY - EAST BAY PLAIN (2-9.04)	18	9
L10006514573	G-11	37.4131	-121.971	FE	ND	0	UG/L	2015-08-14	ENVIRONMENTAL MONITORING (WELLS)	EDF	SANTA CLARA	2	SANTA CLARA VALLEY - SANTA CLARA (2-9.02)	25	10
T0601300383	ESE-5	37.7766	-121.978	FE	=	86000	UG/L	2014-08-21	ENVIRONMENTAL MONITORING (WELLS)	EDF	CONTRA COSTA	2	SAN RAMON VALLEY (2-7)	16	7
T0601300383	ESE-5	37.7766	-121.978	FE	=	8300	UG/L	2015-02-16	ENVIRONMENTAL MONITORING (WELLS)	EDF	CONTRA COSTA	2	SAN RAMON VALLEY (2-7)	16	7
T0608100661	MW-7	37.4947	-122.216	FE	=	6200	UG/L	2014-09-19	ENVIRONMENTAL MONITORING (WELLS)	EDF	SAN MATEO	2	SANTA CLARA VALLEY - SAN MATEO PLAIN (2-9.03)	22	13
T0608100661	MW-7	37.4947	-122.216	FE	=	11000	UG/L	2015-08-28	ENVIRONMENTAL MONITORING (WELLS)	EDF	SAN MATEO	2	SANTA CLARA VALLEY - SAN MATEO PLAIN (2-9.03)	22	13
T0600101516	C3	37.6934	-122.068	FE	=	3700	UG/L	2014-10-14	ENVIRONMENTAL MONITORING (WELLS)	EDF	ALAMEDA	2	CASTRO VALLEY (2-8)	20	10
SL1821Y617	GW-1	37.433	-122.1	FE	=	360	UG/L	2014-12-18	ENVIRONMENTAL MONITORING (WELLS)	EDF	SANTA CLARA	2	SANTA CLARA VALLEY - SANTA CLARA (2-9.02)	24	13
T10000003609	CW-2B	37.9529	-122.061	FE	=	200	UG/L	2016-05-25	ENVIRONMENTAL MONITORING (WELLS)	EDF	CONTRA COSTA	2	YGNACIO VALLEY (2-6)	14	3
T0608500710	MW-32	37.3484	-121.892	FE	=	160	UG/L	2014-10-03	ENVIRONMENTAL MONITORING (WELLS)	EDF	SANTA CLARA	2	SANTA CLARA VALLEY - SANTA CLARA (2-9.02)	27	15
T10000003206	WS-2SU	38.2497	-122.045	FE	ND	0	UG/L	2015-10-20	ENVIRONMENTAL MONITORING (WELLS)	EDF	SOLANO	2	SUISUN-FAIRFIELD VALLEY (2-3)	11	3
T0608590392	MW-7	37.2915	-121.912	FE	=	11000	UG/L	2014-03-19	ENVIRONMENTAL MONITORING (WELLS)	EDF	SANTA CLARA	2	SANTA CLARA VALLEY - SANTA CLARA (2-9.02)	28	15
T0600101516	C2	37.6934	-122.068	FE	=	73	UG/L	2015-12-15	ENVIRONMENTAL MONITORING (WELLS)	EDF	ALAMEDA	2	CASTRO VALLEY (2-8)	20	10
T0600101516	C2	37.6934	-122.068	FE	=	3700	UG/L	2014-10-10	ENVIRONMENTAL MONITORING (WELLS)	EDF	ALAMEDA	2	CASTRO VALLEY (2-8)	20	10
T0608501548	MW-7D1	37.3	-121.822	FE	=	420	UG/L	2013-12-18	ENVIRONMENTAL MONITORING (WELLS)	EDF	SANTA CLARA	2	SANTA CLARA VALLEY - SANTA CLARA (2-9.02)	27	15
T0600100939	MW-2	37.7324	-122.202	FE	=	5200	UG/L	2014-02-05	ENVIRONMENTAL MONITORING (WELLS)	EDF	ALAMEDA	2	SANTA CLARA VALLEY - EAST BAY PLAIN (2-9.04)	18	9
T10000001468	MPMW4-5	37.6275	-122.416	FE	=	1200	UG/L	2016-01-13	ENVIRONMENTAL MONITORING (WELLS)	EDF	SAN MATEO	2	WESTSIDE (2-35)	22	13
SL1821Y617	MW-16D	37.433	-122.1	FE	=	210	UG/L	2014-12-19	ENVIRONMENTAL MONITORING (WELLS)	EDF	SANTA CLARA	2	SANTA CLARA VALLEY - SANTA CLARA (2-9.02)	24	13
W0604100531	4100531-005	37.321	-122.276	FE		210	UG/L	2015-07-08	WATER SUPPLY (WELLS)	DHS	SAN MATEO	2	NO BASIN FOUND	24	13
W0600110003	0110003-015	37.669	-121.801	FE	<	0	UG/L	2016-05-04	WATER SUPPLY (WELLS)	DHS	ALAMEDA	2	LIVERMORE VALLEY (2-10)	16	7
SL1821Y617	GW-3	37.4333	-122.099	FE	ND	0	UG/L	2014-12-17	ENVIRONMENTAL MONITORING (WELLS)	EDF	SANTA CLARA	2	SANTA CLARA VALLEY - SANTA CLARA (2-9.02)	24	13
T0600101410	DW-5	37.6794	-121.777	FE	=	340	UG/L	2014-08-14	ENVIRONMENTAL MONITORING (WELLS)	EDF	ALAMEDA	2	LIVERMORE VALLEY (2-10)	16	7
T0600101410	DW-5	37.6794	-121.777	FE	=	310	UG/L	2015-01-21	ENVIRONMENTAL MONITORING (WELLS)	EDF	ALAMEDA	2	LIVERMORE VALLEY (2-10)	16	7
L10006514573	G-2R	37.4103	-121.967	FE	ND	0	UG/L	2016-08-24	ENVIRONMENTAL MONITORING (WELLS)	EDF	SANTA CLARA	2	SANTA CLARA VALLEY - SANTA CLARA (2-9.02)	25	10
T0600101866	MW-1	37.8078	-122.314	FE	=	6900	UG/L	2013-12-13	ENVIRONMENTAL MONITORING (WELLS)	EDF	ALAMEDA	2	SANTA CLARA VALLEY - EAST BAY PLAIN (2-9.04)	18	9
W0600110001	0110001-046	37.524	-122.038	FE	<	100	UG/L	2015-07-21	WATER SUPPLY (WELLS)	DHS	ALAMEDA	2	SANTA CLARA VALLEY - NILES CONE (2-9.01)	25	10
W0600110001	0110001-048	37.553	-122.038	FE	<	100	UG/L	2014-07-22	WATER SUPPLY (WELLS)	DHS	ALAMEDA	2	SANTA CLARA VALLEY - NILES CONE (2-9.01)	25	10
T0600100980	MW-6R	37.7662	-122.243	FE	=	910	UG/L	2015-08-11	ENVIRONMENTAL MONITORING (WELLS)	EDF	ALAMEDA	2	SANTA CLARA VALLEY - EAST BAY PLAIN (2-9.04)	18	9
T0608500710	MW-28	37.3486	-121.893	FE	ND	0	UG/L	2014-01-22	ENVIRONMENTAL MONITORING (WELLS)	EDF	SANTA CLARA	2	SANTA CLARA VALLEY - SANTA CLARA (2-9.02)	27	15
T10000003609	CW-3A	37.9532	-122.06	FE	=	200	UG/L	2015-12-16	ENVIRONMENTAL MONITORING (WELLS)	EDF	CONTRA COSTA	2	YGNACIO VALLEY (2-6)	14	3
T0608164698	MW-5A	37.5888	-122.363	FE	=	180	UG/L	2013-12-06	ENVIRONMENTAL MONITORING (WELLS)	EDF	SAN MATEO	2	WESTSIDE (2-35)	22	13
T0608164698	MW-5A	37.5888	-122.363	FE	=	4800	UG/L	2014-03-12	ENVIRONMENTAL MONITORING (WELLS)	EDF	SAN MATEO	2	WESTSIDE (2-35)	22	13
T0608500710	EW-1	37.3482	-121.892	FE	ND	0	UG/L	2014-10-06	ENVIRONMENTAL MONITORING (WELLS)	EDF	SANTA CLARA	2	SANTA CLARA VALLEY - SANTA CLARA (2-9.02)	27	15
T0608100572	MW-31B	37.5531	-122.315	FE	=	4800	UG/L	2014-01-02	ENVIRONMENTAL MONITORING (WELLS)	EDF	SAN MATEO	2	SANTA CLARA VALLEY - SAN MATEO PLAIN (2-9.03)	22	13
SL18244665	GW-13A	37.9447	-122.372	FE	=	11300	UG/L	2014-09-15	ENVIRONMENTAL MONITORING (WELLS)	EDF	CONTRA COSTA	2	SANTA CLARA VALLEY - EAST BAY PLAIN (2-9.04)	15	9
T10000003609	CW-4B	37.9532	-122.061	FE	=	310	UG/L	2016-08-29	ENVIRONMENTAL MONITORING (WELLS)	EDF	CONTRA COSTA	2	YGNACIO VALLEY (2-6)	14	3
T0600100421	MW-12	37.6064	-122.065	FE	=	620	UG/L	2016-01-07	ENVIRONMENTAL MONITORING (WELLS)	EDF	ALAMEDA	2	SANTA CLARA VALLEY - EAST BAY PLAIN (2-9.04)	20	10
T0608590392	MW-8	37.2912	-121.912	FE	=	4600	UG/L	2016-03-02	ENVIRONMENTAL MONITORING (WELLS)	EDF	SANTA CLARA	2	SANTA CLARA VALLEY - SANTA CLARA (2-9.02)	28	15
T10000003609	CW-6A	37.9535	-122.061	FE	=	310	UG/L	2016-08-29	ENVIRONMENTAL MONITORING (WELLS)	EDF	CONTRA COSTA	2	YGNACIO VALLEY (2-6)	14	3
T0600101803	EW-5	37.7685	-122.24	FE	=	26000	UG/L	2014-06-19	ENVIRONMENTAL MONITORING (WELLS)	EDF	ALAMEDA	2	SANTA CLARA VALLEY - EAST BAY PLAIN (2-9.04)	18	9
T0600101803	EW-5	37.7685	-122.24	FE	=	24000	UG/L	2014-06-19	ENVIRONMENTAL MONITORING (WELLS)	EDF	ALAMEDA	2	SANTA CLARA VALLEY - EAST BAY PLAIN (2-9.04)	18	9
T0601300383	MW-8	37.7768	-121.978	FE	=	56700	UG/L	2015-02-16	ENVIRONMENTAL MONITORING (WELLS)	EDF	CONTRA COSTA	2	SAN RAMON VALLEY (2-7)	16	7
T0601300383	MW-8	37.7768	-121.978	FE	=	4880	UG/L	2015-04-09	ENVIRONMENTAL MONITORING (WELLS)	EDF	CONTRA COSTA	2	SAN RAMON VALLEY (2-7)	16	7
W0602110501	2110501-004	38.046	-122.87	FE	<	100	UG/L	2014-03-30	WATER SUPPLY (WELLS)	DHS	MARIN	2	NO BASIN FOUND	10	2
W0602110501	2110501-004	38.046	-122.87	FE	<	0	UG/L	2014-09-09	WATER SUPPLY (WELLS)	DHS	MARIN	2	NO BASIN FOUND	10	2
W0602110501	2110501-004	38.046	-122.87	FE	<	0	UG/L	2014-12-02	WATER SUPPLY (WELLS)	DHS	MARIN	2	NO BASIN FOUND	10	2
W0602110501	2110501-004	38.046	-122.87	FE		440	UG/L	2015-04-14	WATER SUPPLY (WELLS)	DHS	MARIN	2	NO BASIN FOUND	10	2
W0602110006	2110006-003	38.075	-122.791	FE	<	0	UG/L	2015-11-17	WATER SUPPLY (WELLS)	DHS	MARIN	2	NO BASIN FOUND	10	2
W0602110007	2110007-008	38.248	-122.95	FE		3800	UG/L	2015-06-04	WATER SUPPLY (WELLS)	DHS	MARIN	2	WILSON GROVE FORMATION HIGHLANDS (1-59)	10	2
W0602110007	2110007-008	38.248	-122.95	FE		4800	UG/L	2016-07-18	WATER SUPPLY (WELLS)	DHS	MARIN	2	WILSON GROVE FORMATION HIGHLANDS (1-59)	10	2
W0604110009	4110009-008	37.669	-122.435	FE		10.3	UG/L	2013-12-04	WATER SUPPLY (WELLS)	DHS	SAN MATEO	2	WESTSIDE (2-35)	19	13
W0604110013	4110013-004	37.698	-122.474	FE	<	0	UG/L	2016-01-20	WATER SUPPLY (WELLS)	DHS	SAN MATEO	2	WESTSIDE (2-35)	19	11
W0604900562	4900562-003	38.306	-122.553	FE		350	UG/L	2014-10-24	WATER SUPPLY (WELLS)	DHS	SONOMA	2	NO BASIN FOUND	10	3
W0604900562	4900562-002	38.306	-122.553	FE		2300	UG/L	2014-10-24	WATER SUPPLY (WELLS)	DHS	SONOMA	2	NO BASIN FOUND	4	3
W0602110502	2110502-001	38.075	-122.95	FE	<	0	UG/L	2014-11-04	WATER SUPPLY (WELLS)	DHS	MARIN	2	NO BASIN FOUND	10	2
W0604310007	4310007-016	37.408	-122.078	FE	<	100	UG/L	2014-04-23	WATER SUPPLY (WELLS)	DHS	SANTA CLARA	2	SANTA CLARA VALLEY - SANTA CLARA (2-9.02)	24	13
W0604310011	4310011-136	37.321	-121.959	FE	<	100	UG/L	2015-03-11	WATER SUPPLY (WELLS)	DHS	SANTA CLARA	2	SANTA CLARA VALLEY - SANTA CLARA (2-9.02)	28	15
W0604310011	4310011-136	37.321	-121.959	FE		110	UG/L	2015-12-02	WATER SUPPLY (WELLS)	DHS	SANTA CLARA	2	SANTA CLARA VALLEY - SANTA CLARA (2-9.02)	28	15
W0604300525	4300525-003	37.147	-121.959	FE		2900	UG/L	2016-01-18	WATER SUPPLY (WELLS)	DHS	SANTA CLARA	2	NO BASIN FOUND	28	15
W0604300525	4300525-003	37.147	-121.959	FE		4200	UG/L	2016-04-20	WATER SUPPLY (WELLS)	DHS	SANTA CLARA	2	NO BASIN FOUND	28	15
W0604310011	4310011-129	37.321	-121.959	FE		100	UG/L	2016-03-28	WATER SUPPLY (WELLS)	DHS	SANTA CLARA	2	SANTA CLARA VALLEY - SANTA CLARA (2-9.02)	28	15
W0604310011	4310011-115	37.321	-121.88	FE		210	UG/L	2015-08-07	WATER SUPPLY (WELLS)	DHS	SANTA CLARA	2	SANTA CLARA VALLEY - SANTA CLARA (2-9.02)	27	15
W0600110008	0110008-004	37.669	-121.84	FE	<	0	UG/L	2015-09-15	WATER SUPPLY (WELLS)	DHS	ALAMEDA	2	LIVERMORE VALLEY (2-10)	16	7
W0600110010	0110010-006	37.698	-121.88	FE		0	UG/L	2016-03-03	WATER SUPPLY (WELLS)	DHS	ALAMEDA	2	LIVERMORE VALLEY (2-10)	16	7
W0600110010	0110010-005	37.669	-121.92	FE	<	0	UG/L	2014-06-10	WATER SUPPLY (WELLS)	DHS	ALAMEDA	2	LIVERMORE VALLEY (2-10)	16	7
W0604910006	4910006-009	38.248	-122.633	FE		220	UG/L	2015-03-11	WATER SUPPLY (WELLS)	DHS	SONOMA	2	PETALUMA VALLEY (2-1)	10	3
W0602810004	2810004-006	38.509	-122.435	FE	<	100	UG/L	2014-10-28	WATER SUPPLY (WELLS)	DHS	NAPA	2	NO BASIN FOUND	4	3
W0602810012	2810012-004	38.567	-122.435	FE	<	100	UG/L	2015-03-31	WATER SUPPLY (WELLS)	DHS	NAPA	2	NO BASIN FOUND	4	3
W0602810007	2810007-002	38.393	-122.355	FE		610	UG/L	2015-06-09	WATER SUPPLY (WELLS)	DHS	NAPA	2	NAPA-SONOMA VALLEY - NAPA VALLEY (2-2.01)	4	3
W0600110001	0110001-013	37.553	-121.999	FE	<	100	UG/L	2015-07-06	WATER SUPPLY (WELLS)	DHS	ALAMEDA	2	SANTA CLARA VALLEY - NILES CONE (2-9.01)	20	10
W0600110001	0110001-011	37.553	-121.999	FE	<	100	UG/L	2014-07-28	WATER SUPPLY (WELLS)	DHS	ALAMEDA	2	SANTA CLARA VALLEY - NILES CONE (2-9.01)	20	10
W0604900533	4900533-001	38.393	-122.553	FE		120	UG/L	2016-06-30	WATER SUPPLY (WELLS)	DHS	SONOMA	2	NAPA-SONOMA VALLEY - SONOMA VALLEY (2-2.02)	4	2
W0604310011	4310011-106	37.292	-121.92	FE		320	UG/L	2014-06-17	WATER SUPPLY (WELLS)	DHS	SANTA CLARA	2	SANTA CLARA VALLEY - SANTA CLARA (2-9.02)	28	15
W0604900843	4900843-003	38.306	-122.435	FE		200	UG/L	2015-01-12	WATER SUPPLY (WELLS)	DHS	SONOMA	2	NO BASIN FOUND	4	3
W0604110013	4110013-018	37.698	-122.474	FE	<	0	UG/L	2016-02-03	WATER SUPPLY (WELLS)	DHS	SAN MATEO	2	WESTSIDE (2-35)	19	11
W0604310011	4310011-005	37.379	-121.88	FE	<	0	UG/L	2016-02-25	WATER SUPPLY (WELLS)	DHS	SANTA CLARA	2	SANTA CLARA VALLEY - SANTA CLARA (2-9.02)	25	10
W0604310012	4310012-007	37.35	-121.999	FE	<	100	UG/L	2015-08-20	WATER SUPPLY (WELLS)	DHS	SANTA CLARA	2	SANTA CLARA VALLEY - SANTA CLARA (2-9.02)	25	10
W0604110020	4110020-004	37.466	-122.157	FE	<	0	UG/L	2014-05-19	WATER SUPPLY (WELLS)	DHS	SAN MATEO	2	SANTA CLARA VALLEY - SAN MATEO PLAIN (2-9.03)	24	13
W0604900843	4900843-004	38.306	-122.435	FE	<	100	UG/L	2014-12-09	WATER SUPPLY (WELLS)	DHS	SONOMA	2	NO BASIN FOUND	4	3
W0604310011	4310011-060	37.379	-121.88	FE		960	UG/L	2014-08-14	WATER SUPPLY (WELLS)	DHS	SANTA CLARA	2	SANTA CLARA VALLEY - SANTA CLARA (2-9.02)	25	10
W0604310011	4310011-060	37.379	-121.88	FE	<	100	UG/L	2014-11-12	WATER SUPPLY (WELLS)	DHS	SANTA CLARA	2	SANTA CLARA VALLEY - SANTA CLARA (2-9.02)	25	10
W0602800528	2800528-001	38.567	-122.435	FE	<	100	UG/L	2014-12-01	WATER SUPPLY (WELLS)	DHS	NAPA	2	NO BASIN FOUND	4	3
W0602000573	2000573-001	38.248	-122.95	FE		300	UG/L	2016-05-03	WATER SUPPLY (WELLS)	DHS	MARIN	2	NO BASIN FOUND	10	2
W0602100519	2100519-006	38.248	-122.95	FE		150	UG/L	2015-07-27	WATER SUPPLY (WELLS)	DHS	MARIN	2	NO BASIN FOUND	10	2
W0602110008	2110008-003	38.248	-122.95	FE	<	100	UG/L	2014-04-23	WATER SUPPLY (WELLS)	DHS	MARIN	2	SAND POINT AREA (2-27)	10	2
W0600110010	0110010-017	37.698	-121.84	FE	<	0	UG/L	2015-03-03	WATER SUPPLY (WELLS)	DHS	ALAMEDA	2	LIVERMORE VALLEY (2-10)	16	7
W0602801016	2801016-003	38.335	-122.395	FE	<	0	UG/L	2015-05-18	WATER SUPPLY (WELLS)	DHS	NAPA	2	NO BASIN FOUND	4	3
W0604310011	4310011-141	37.292	-121.88	FE	<	100	UG/L	2014-03-17	WATER SUPPLY (WELLS)	DHS	SANTA CLARA	2	SANTA CLARA VALLEY - SANTA CLARA (2-9.02)	27	15
W0604110009	4110009-006	37.669	-122.435	FE	<	0	UG/L	2015-03-04	WATER SUPPLY (WELLS)	DHS	SAN MATEO	2	WESTSIDE (2-35)	22	13
W0604110009	4110009-006	37.669	-122.435	FE	<	0	UG/L	2015-06-25	WATER SUPPLY (WELLS)	DHS	SAN MATEO	2	WESTSIDE (2-35)	22	13
W0604110009	4110009-006	37.669	-122.435	FE	<	0	UG/L	2016-05-05	WATER SUPPLY (WELLS)	DHS	SAN MATEO	2	WESTSIDE (2-35)	22	13
W0604310011	4310011-125	37.321	-121.959	FE	<	100	UG/L	2015-03-11	WATER SUPPLY (WELLS)	DHS	SANTA CLARA	2	SANTA CLARA VALLEY - SANTA CLARA (2-9.02)	28	15
T0608164698	MW-6	37.5886	-122.363	FE	=	440	UG/L	2013-12-05	ENVIRONMENTAL MONITORING (WELLS)	EDF	SAN MATEO	2	WESTSIDE (2-35)	22	13
T0608164698	MW-6	37.5886	-122.363	FE	=	1700	UG/L	2014-03-12	ENVIRONMENTAL MONITORING (WELLS)	EDF	SAN MATEO	2	WESTSIDE (2-35)	22	13
T10000001468	MPMW6-3	37.6278	-122.416	FE	ND	0	UG/L	2014-01-13	ENVIRONMENTAL MONITORING (WELLS)	EDF	SAN MATEO	2	WESTSIDE (2-35)	22	13
T0601300383	SW-1	37.7766	-121.978	FE	=	4520	UG/L	2015-07-20	ENVIRONMENTAL MONITORING (WELLS)	EDF	CONTRA COSTA	2	SAN RAMON VALLEY (2-7)	16	7
T0601300383	SW-1	37.7766	-121.978	FE	=	35600	UG/L	2015-05-28	ENVIRONMENTAL MONITORING (WELLS)	EDF	CONTRA COSTA	2	SAN RAMON VALLEY (2-7)	16	7
T0601300383	SW-1	37.7766	-121.978	FE	=	82900	UG/L	2015-06-22	ENVIRONMENTAL MONITORING (WELLS)	EDF	CONTRA COSTA	2	SAN RAMON VALLEY (2-7)	16	7
W0604310011	4310011-026	37.321	-121.92	FE		190	UG/L	2014-10-03	WATER SUPPLY (WELLS)	DHS	SANTA CLARA	2	SANTA CLARA VALLEY - SANTA CLARA (2-9.02)	28	15
T10000000901	MW2	37.3506	-121.974	FE	=	240	UG/L	2014-09-08	ENVIRONMENTAL MONITORING (WELLS)	EDF	SANTA CLARA	2	SANTA CLARA VALLEY - SANTA CLARA (2-9.02)	25	10
L10006514573	G-01	37.4107	-121.969	FE	ND	0	UG/L	2016-03-04	ENVIRONMENTAL MONITORING (WELLS)	EDF	SANTA CLARA	2	SANTA CLARA VALLEY - SANTA CLARA (2-9.02)	25	10
L10006514573	G-01	37.4107	-121.969	FE	ND	0	UG/L	2016-09-29	ENVIRONMENTAL MONITORING (WELLS)	EDF	SANTA CLARA	2	SANTA CLARA VALLEY - SANTA CLARA (2-9.02)	25	10
T0609700943	MW-16	38.2493	-122.626	FE	=	260	UG/L	2014-11-07	ENVIRONMENTAL MONITORING (WELLS)	EDF	SONOMA	2	PETALUMA VALLEY (2-1)	10	3
T0600141337	MW-10	37.5525	-122.054	FE	=	30000	UG/L	2015-02-11	ENVIRONMENTAL MONITORING (WELLS)	EDF	ALAMEDA	2	SANTA CLARA VALLEY - NILES CONE (2-9.01)	20	10
T0600100980	MW-4R	37.766	-122.243	FE	=	4900	UG/L	2014-06-25	ENVIRONMENTAL MONITORING (WELLS)	EDF	ALAMEDA	2	SANTA CLARA VALLEY - EAST BAY PLAIN (2-9.04)	18	9
T0608590392	MW-9	37.2912	-121.912	FE	=	3300	UG/L	2014-09-17	ENVIRONMENTAL MONITORING (WELLS)	EDF	SANTA CLARA	2	SANTA CLARA VALLEY - SANTA CLARA (2-9.02)	28	15
T0608590392	MW-9	37.2912	-121.912	FE	=	12000	UG/L	2016-03-02	ENVIRONMENTAL MONITORING (WELLS)	EDF	SANTA CLARA	2	SANTA CLARA VALLEY - SANTA CLARA (2-9.02)	28	15
T0601300383	MW-12	37.7775	-121.977	FE	=	150000	UG/L	2014-02-27	ENVIRONMENTAL MONITORING (WELLS)	EDF	CONTRA COSTA	2	SAN RAMON VALLEY (2-7)	16	7
T0601300383	MW-12	37.7775	-121.977	FE	=	410000	UG/L	2014-08-21	ENVIRONMENTAL MONITORING (WELLS)	EDF	CONTRA COSTA	2	SAN RAMON VALLEY (2-7)	16	7
T0601300383	MW-12	37.7775	-121.977	FE	=	41400	UG/L	2015-02-16	ENVIRONMENTAL MONITORING (WELLS)	EDF	CONTRA COSTA	2	SAN RAMON VALLEY (2-7)	16	7
T0601300383	OW-1	37.7767	-121.978	FE	=	122000	UG/L	2015-02-16	ENVIRONMENTAL MONITORING (WELLS)	EDF	CONTRA COSTA	2	SAN RAMON VALLEY (2-7)	16	7
T0601300383	OW-1	37.7767	-121.978	FE	=	12000	UG/L	2015-07-20	ENVIRONMENTAL MONITORING (WELLS)	EDF	CONTRA COSTA	2	SAN RAMON VALLEY (2-7)	16	7
T0600101483	MW-4	37.5269	-122.006	FE	=	12300	UG/L	2015-11-17	ENVIRONMENTAL MONITORING (WELLS)	EDF	ALAMEDA	2	SANTA CLARA VALLEY - NILES CONE (2-9.01)	25	10
T0600101483	MW-4	37.5269	-122.006	FE	=	6230	UG/L	2016-01-14	ENVIRONMENTAL MONITORING (WELLS)	EDF	ALAMEDA	2	SANTA CLARA VALLEY - NILES CONE (2-9.01)	25	10
T0608100077	MW-14	37.6873	-122.47	FE	=	120000	UG/L	2014-11-07	ENVIRONMENTAL MONITORING (WELLS)	EDF	SAN MATEO	2	WESTSIDE (2-35)	19	11
T10000001468	MPMW3-2	37.6277	-122.416	FE	=	38000	UG/L	2014-04-17	ENVIRONMENTAL MONITORING (WELLS)	EDF	SAN MATEO	2	WESTSIDE (2-35)	22	13
T0601300383	SW-2	37.7766	-121.978	FE	=	28700	UG/L	2015-02-16	ENVIRONMENTAL MONITORING (WELLS)	EDF	CONTRA COSTA	2	SAN RAMON VALLEY (2-7)	16	7
T0601300383	SW-2	37.7766	-121.978	FE	ND	0	UG/L	2015-03-20	ENVIRONMENTAL MONITORING (WELLS)	EDF	CONTRA COSTA	2	SAN RAMON VALLEY (2-7)	16	7
L10006224883	L-5	37.8717	-122.318	FE	ND	0	UG/L	2016-01-21	ENVIRONMENTAL MONITORING (WELLS)	EDF	ALAMEDA	2	SANTA CLARA VALLEY - EAST BAY PLAIN (2-9.04)	15	9
T0600101016	MW-7	37.6157	-122.082	FE	=	4900	UG/L	2014-03-31	ENVIRONMENTAL MONITORING (WELLS)	EDF	ALAMEDA	2	SANTA CLARA VALLEY - EAST BAY PLAIN (2-9.04)	20	10
SL0600106796	MW-20R	37.527	-122.034	FE	=	34000	UG/L	2016-05-09	ENVIRONMENTAL MONITORING (WELLS)	EDF	ALAMEDA	2	SANTA CLARA VALLEY - NILES CONE (2-9.01)	25	10
T0600101410	DW-6	37.6798	-121.777	FE	=	690	UG/L	2014-01-22	ENVIRONMENTAL MONITORING (WELLS)	EDF	ALAMEDA	2	LIVERMORE VALLEY (2-10)	16	7
T0600101410	DW-6	37.6798	-121.777	FE	=	920	UG/L	2015-01-21	ENVIRONMENTAL MONITORING (WELLS)	EDF	ALAMEDA	2	LIVERMORE VALLEY (2-10)	16	7
L10006224883	L-6	37.8746	-122.32	FE	ND	0	UG/L	2016-07-19	ENVIRONMENTAL MONITORING (WELLS)	EDF	NO COUNTY FOUND	2	NO BASIN FOUND	15	9
T0608100147	C-2	37.629	-122.417	FE	=	73	UG/L	2014-01-10	ENVIRONMENTAL MONITORING (WELLS)	EDF	SAN MATEO	2	WESTSIDE (2-35)	22	13
T0608100147	C-2	37.629	-122.417	FE	=	1300	UG/L	2014-06-04	ENVIRONMENTAL MONITORING (WELLS)	EDF	SAN MATEO	2	WESTSIDE (2-35)	22	13
T0600101516	EW2	37.6934	-122.068	FE	=	4300	UG/L	2014-10-14	ENVIRONMENTAL MONITORING (WELLS)	EDF	ALAMEDA	2	CASTRO VALLEY (2-8)	20	10
T0600101516	EW2	37.6934	-122.068	FE	=	3700	UG/L	2015-01-28	ENVIRONMENTAL MONITORING (WELLS)	EDF	ALAMEDA	2	CASTRO VALLEY (2-8)	20	10
T0600101516	C1	37.6933	-122.068	FE	=	6200	UG/L	2014-10-10	ENVIRONMENTAL MONITORING (WELLS)	EDF	ALAMEDA	2	CASTRO VALLEY (2-8)	20	10
T0600101516	C1	37.6933	-122.068	FE	=	2800	UG/L	2015-12-15	ENVIRONMENTAL MONITORING (WELLS)	EDF	ALAMEDA	2	CASTRO VALLEY (2-8)	20	10
T0601300383	SW-4	37.7767	-121.978	FE	=	868	UG/L	2015-03-20	ENVIRONMENTAL MONITORING (WELLS)	EDF	CONTRA COSTA	2	SAN RAMON VALLEY (2-7)	16	7
T0601300383	SW-4	37.7767	-121.978	FE	=	58100	UG/L	2015-04-23	ENVIRONMENTAL MONITORING (WELLS)	EDF	CONTRA COSTA	2	SAN RAMON VALLEY (2-7)	16	7
T0601300383	SW-4	37.7767	-121.978	FE	=	3730	UG/L	2015-06-22	ENVIRONMENTAL MONITORING (WELLS)	EDF	CONTRA COSTA	2	SAN RAMON VALLEY (2-7)	16	7
W0600110010	0110010-019	37.698	-121.88	FE		0	UG/L	2015-06-24	WATER SUPPLY (WELLS)	DHS	ALAMEDA	2	LIVERMORE VALLEY (2-10)	16	7
L10006514573	G-3R	37.4137	-121.965	FE	ND	0	UG/L	2014-02-26	ENVIRONMENTAL MONITORING (WELLS)	EDF	SANTA CLARA	2	SANTA CLARA VALLEY - SANTA CLARA (2-9.02)	25	10
L10006514573	G-06	37.4145	-121.972	FE	ND	0	UG/L	2014-03-03	ENVIRONMENTAL MONITORING (WELLS)	EDF	SANTA CLARA	2	SANTA CLARA VALLEY - SANTA CLARA (2-9.02)	25	10
L10006514573	G-3R	37.4137	-121.965	FE	ND	0	UG/L	2016-03-03	ENVIRONMENTAL MONITORING (WELLS)	EDF	SANTA CLARA	2	SANTA CLARA VALLEY - SANTA CLARA (2-9.02)	25	10
W0600110010	0110010-019	37.698	-121.88	FE		0	UG/L	2016-07-13	WATER SUPPLY (WELLS)	DHS	ALAMEDA	2	LIVERMORE VALLEY (2-10)	16	7
W0600110001	0110001-022	37.553	-121.959	FE	<	100	UG/L	2015-07-06	WATER SUPPLY (WELLS)	DHS	ALAMEDA	2	SANTA CLARA VALLEY - NILES CONE (2-9.01)	20	10
T0600100421	MW-7	37.6062	-122.065	FE	ND	0	UG/L	2016-04-14	ENVIRONMENTAL MONITORING (WELLS)	EDF	ALAMEDA	2	SANTA CLARA VALLEY - EAST BAY PLAIN (2-9.04)	20	10
L10009353957	CW-6	37.9514	-122.38	FE	ND	0	UG/L	2014-02-19	ENVIRONMENTAL MONITORING (WELLS)	EDF	CONTRA COSTA	2	NO BASIN FOUND	15	9
W0600110001	0110001-023	37.553	-121.959	FE	<	100	UG/L	2014-08-04	WATER SUPPLY (WELLS)	DHS	ALAMEDA	2	SANTA CLARA VALLEY - NILES CONE (2-9.01)	20	10
L10009353957	CW-6	37.9514	-122.38	FE	=	3200	UG/L	2014-08-27	ENVIRONMENTAL MONITORING (WELLS)	EDF	CONTRA COSTA	2	NO BASIN FOUND	15	9
L10009353957	CW-6	37.9514	-122.38	FE	ND	0	UG/L	2015-12-02	ENVIRONMENTAL MONITORING (WELLS)	EDF	CONTRA COSTA	2	NO BASIN FOUND	15	9
L10009353957	CW-6	37.9514	-122.38	FE	=	7270	UG/L	2015-07-22	ENVIRONMENTAL MONITORING (WELLS)	EDF	CONTRA COSTA	2	NO BASIN FOUND	15	9
T10000001468	MPMW3-5	37.6277	-122.416	FE	ND	0	UG/L	2014-01-13	ENVIRONMENTAL MONITORING (WELLS)	EDF	SAN MATEO	2	WESTSIDE (2-35)	22	13
T10000001468	MPMW3-5	37.6277	-122.416	FE	=	160000	UG/L	2016-01-14	ENVIRONMENTAL MONITORING (WELLS)	EDF	SAN MATEO	2	WESTSIDE (2-35)	22	13
W0600110001	0110001-020	37.553	-121.959	FE	<	100	UG/L	2014-07-21	WATER SUPPLY (WELLS)	DHS	ALAMEDA	2	SANTA CLARA VALLEY - NILES CONE (2-9.01)	20	10
T0608100661	MW-5A	37.4936	-122.215	FE	=	470	UG/L	2013-12-26	ENVIRONMENTAL MONITORING (WELLS)	EDF	SAN MATEO	2	SANTA CLARA VALLEY - SAN MATEO PLAIN (2-9.03)	22	13
T0608100661	MW-5A	37.4936	-122.215	FE	=	600	UG/L	2014-09-19	ENVIRONMENTAL MONITORING (WELLS)	EDF	SAN MATEO	2	SANTA CLARA VALLEY - SAN MATEO PLAIN (2-9.03)	22	13
SL18244665	GW-8C	37.9424	-122.368	FE	ND	0	UG/L	2014-09-25	ENVIRONMENTAL MONITORING (WELLS)	EDF	CONTRA COSTA	2	SANTA CLARA VALLEY - EAST BAY PLAIN (2-9.04)	15	9
L10006514573	G-12	37.4114	-121.971	FE	ND	0	UG/L	2014-02-27	ENVIRONMENTAL MONITORING (WELLS)	EDF	SANTA CLARA	2	SANTA CLARA VALLEY - SANTA CLARA (2-9.02)	25	10
T10000003609	CW-8B	37.9538	-122.061	FE	=	2400	UG/L	2016-05-25	ENVIRONMENTAL MONITORING (WELLS)	EDF	CONTRA COSTA	2	YGNACIO VALLEY (2-6)	14	3
T10000003609	CW-8B	37.9538	-122.061	FE	=	1700	UG/L	2016-08-29	ENVIRONMENTAL MONITORING (WELLS)	EDF	CONTRA COSTA	2	YGNACIO VALLEY (2-6)	14	3
T0608501548	MW-9-P	37.3008	-121.822	FE	=	2700	UG/L	2013-12-18	ENVIRONMENTAL MONITORING (WELLS)	EDF	SANTA CLARA	2	SANTA CLARA VALLEY - SANTA CLARA (2-9.02)	27	15
T0600100939	IW-6	37.7326	-122.201	FE	=	52000	UG/L	2014-02-05	ENVIRONMENTAL MONITORING (WELLS)	EDF	ALAMEDA	2	SANTA CLARA VALLEY - EAST BAY PLAIN (2-9.04)	18	9
T0600100939	MW-10	37.7323	-122.202	FE	=	6500	UG/L	2014-08-29	ENVIRONMENTAL MONITORING (WELLS)	EDF	ALAMEDA	2	SANTA CLARA VALLEY - EAST BAY PLAIN (2-9.04)	18	9
T0608100661	MW-2	37.4945	-122.215	FE	=	430	UG/L	2013-12-26	ENVIRONMENTAL MONITORING (WELLS)	EDF	SAN MATEO	2	SANTA CLARA VALLEY - SAN MATEO PLAIN (2-9.03)	22	13
T0608100661	MW-2	37.4945	-122.215	FE	=	520	UG/L	2015-08-28	ENVIRONMENTAL MONITORING (WELLS)	EDF	SAN MATEO	2	SANTA CLARA VALLEY - SAN MATEO PLAIN (2-9.03)	22	13
T0601300383	ESE-3	37.7766	-121.978	FE	=	24000	UG/L	2014-02-27	ENVIRONMENTAL MONITORING (WELLS)	EDF	CONTRA COSTA	2	SAN RAMON VALLEY (2-7)	16	7
T0601300383	ESE-3	37.7766	-121.978	FE	=	30200	UG/L	2015-05-28	ENVIRONMENTAL MONITORING (WELLS)	EDF	CONTRA COSTA	2	SAN RAMON VALLEY (2-7)	16	7
T0601300383	ESE-3	37.7766	-121.978	FE	=	659	UG/L	2015-03-20	ENVIRONMENTAL MONITORING (WELLS)	EDF	CONTRA COSTA	2	SAN RAMON VALLEY (2-7)	16	7
T0601300383	ESE-3	37.7766	-121.978	FE	=	3800	UG/L	2015-03-20	ENVIRONMENTAL MONITORING (WELLS)	EDF	CONTRA COSTA	2	SAN RAMON VALLEY (2-7)	16	7
T0600100980	MW-7R	37.7661	-122.243	FE	=	8900	UG/L	2015-08-11	ENVIRONMENTAL MONITORING (WELLS)	EDF	ALAMEDA	2	SANTA CLARA VALLEY - EAST BAY PLAIN (2-9.04)	18	9
T0608500710	MW-33	37.3489	-121.893	FE	ND	0	UG/L	2014-04-30	ENVIRONMENTAL MONITORING (WELLS)	EDF	SANTA CLARA	2	SANTA CLARA VALLEY - SANTA CLARA (2-9.02)	27	15
T0608500710	MW-33	37.3489	-121.893	FE	ND	0	UG/L	2014-10-03	ENVIRONMENTAL MONITORING (WELLS)	EDF	SANTA CLARA	2	SANTA CLARA VALLEY - SANTA CLARA (2-9.02)	27	15
T0608500710	MW-33	37.3489	-121.893	FE	ND	0	UG/L	2015-09-14	ENVIRONMENTAL MONITORING (WELLS)	EDF	SANTA CLARA	2	SANTA CLARA VALLEY - SANTA CLARA (2-9.02)	27	15
T0600101016	MW-16	37.6153	-122.082	FE	ND	0	UG/L	2014-03-31	ENVIRONMENTAL MONITORING (WELLS)	EDF	ALAMEDA	2	SANTA CLARA VALLEY - EAST BAY PLAIN (2-9.04)	20	10
T0600101016	MW-16	37.6153	-122.082	FE	ND	0	UG/L	2014-09-11	ENVIRONMENTAL MONITORING (WELLS)	EDF	ALAMEDA	2	SANTA CLARA VALLEY - EAST BAY PLAIN (2-9.04)	20	10
L10006224883	L-4	37.8719	-122.317	FE	ND	220	UG/L	2016-01-21	ENVIRONMENTAL MONITORING (WELLS)	EDF	ALAMEDA	2	SANTA CLARA VALLEY - EAST BAY PLAIN (2-9.04)	15	9
W0604300861	4300861-002	37.147	-121.682	FE	<	0	UG/L	2016-01-25	WATER SUPPLY (WELLS)	DHS	SANTA CLARA	2	SANTA CLARA VALLEY - SANTA CLARA (2-9.02)	29	17
W0604310011	4310011-100	37.292	-121.92	FE		240	UG/L	2014-05-27	WATER SUPPLY (WELLS)	DHS	SANTA CLARA	2	SANTA CLARA VALLEY - SANTA CLARA (2-9.02)	28	15
W0604310011	4310011-103	37.292	-121.92	FE	<	100	UG/L	2014-05-07	WATER SUPPLY (WELLS)	DHS	SANTA CLARA	2	SANTA CLARA VALLEY - SANTA CLARA (2-9.02)	28	15
W0604310005	4310005-002	37.408	-121.92	FE	<	100	UG/L	2016-05-25	WATER SUPPLY (WELLS)	DHS	SANTA CLARA	2	SANTA CLARA VALLEY - SANTA CLARA (2-9.02)	25	10
W0604310011	4310011-013	37.263	-121.88	FE		320	UG/L	2014-12-04	WATER SUPPLY (WELLS)	DHS	SANTA CLARA	2	SANTA CLARA VALLEY - SANTA CLARA (2-9.02)	28	15
W0604900973	4900973-002	38.277	-122.514	FE	<	100	UG/L	2015-02-22	WATER SUPPLY (WELLS)	DHS	SONOMA	2	NAPA-SONOMA VALLEY - SONOMA VALLEY (2-2.02)	10	3
W0604110020	4110020-006	37.466	-122.157	FE		160	UG/L	2014-08-19	WATER SUPPLY (WELLS)	DHS	SAN MATEO	2	SANTA CLARA VALLEY - SAN MATEO PLAIN (2-9.03)	24	13
W0604110020	4110020-006	37.466	-122.157	FE		230	UG/L	2015-11-17	WATER SUPPLY (WELLS)	DHS	SAN MATEO	2	SANTA CLARA VALLEY - SAN MATEO PLAIN (2-9.03)	24	13
W0604900843	4900843-002	38.335	-122.435	FE		130	UG/L	2015-01-12	WATER SUPPLY (WELLS)	DHS	SONOMA	2	NO BASIN FOUND	4	3
W0604100555	4100555-001	37.263	-122.197	FE	<	0	UG/L	2016-07-28	WATER SUPPLY (WELLS)	DHS	SAN MATEO	2	NO BASIN FOUND	24	13
W0604310020	4310020-004	37.292	-121.84	FE		270	UG/L	2014-03-27	WATER SUPPLY (WELLS)	DHS	SANTA CLARA	2	SANTA CLARA VALLEY - SANTA CLARA (2-9.02)	27	15
W0602801029	2801029-004	38.393	-122.316	FE		1100	UG/L	2014-02-05	WATER SUPPLY (WELLS)	DHS	NAPA	2	NO BASIN FOUND	4	3
W0600110001	0110001-049	37.524	-121.999	FE	<	100	UG/L	2015-07-21	WATER SUPPLY (WELLS)	DHS	ALAMEDA	2	SANTA CLARA VALLEY - NILES CONE (2-9.01)	25	10
W0602800648	2800648-001	38.335	-122.316	FE		190	UG/L	2015-10-07	WATER SUPPLY (WELLS)	DHS	NAPA	2	NAPA-SONOMA VALLEY - NAPA VALLEY (2-2.01)	4	3
W0604410016	4410016-004	37.234	-122.078	FE		8700	UG/L	2014-02-26	WATER SUPPLY (WELLS)	DHS	SANTA CLARA	2	NO BASIN FOUND	28	15
W0604410016	4410016-004	37.234	-122.078	FE		4400	UG/L	2015-11-05	WATER SUPPLY (WELLS)	DHS	SANTA CLARA	2	NO BASIN FOUND	28	15
W0602800024	2800024-001	38.538	-122.474	FE	<	0	UG/L	2014-08-28	WATER SUPPLY (WELLS)	DHS	NAPA	2	NAPA-SONOMA VALLEY - NAPA VALLEY (2-2.01)	4	3
W0602800531	2800531-001	38.567	-122.435	FE		9600	UG/L	2015-06-24	WATER SUPPLY (WELLS)	DHS	NAPA	2	NO BASIN FOUND	4	3
W0600707585	0707585-001	37.843	-122.157	FE	<	0	UG/L	2014-06-03	WATER SUPPLY (WELLS)	DHS	CONTRA COSTA	2	NO BASIN FOUND	16	7
T0600101016	MW-8	37.6154	-122.082	FE	=	4700	UG/L	2015-10-02	ENVIRONMENTAL MONITORING (WELLS)	EDF	ALAMEDA	2	SANTA CLARA VALLEY - EAST BAY PLAIN (2-9.04)	20	10
SL18244665	GW-10C	37.9457	-122.372	FE	ND	78.1	UG/L	2015-09-17	ENVIRONMENTAL MONITORING (WELLS)	EDF	CONTRA COSTA	2	SANTA CLARA VALLEY - EAST BAY PLAIN (2-9.04)	15	9
SL18244665	GW-25C	37.9415	-122.374	FE	ND	74	UG/L	2015-09-23	ENVIRONMENTAL MONITORING (WELLS)	EDF	CONTRA COSTA	2	SANTA CLARA VALLEY - EAST BAY PLAIN (2-9.04)	15	9
T10000001468	MPMW3-4	37.6277	-122.416	FE	=	130000	UG/L	2014-04-17	ENVIRONMENTAL MONITORING (WELLS)	EDF	SAN MATEO	2	WESTSIDE (2-35)	22	13
L10006514573	G-08	37.4157	-121.974	FE	=	3900	UG/L	2014-07-18	ENVIRONMENTAL MONITORING (WELLS)	EDF	SANTA CLARA	2	SANTA CLARA VALLEY - SANTA CLARA (2-9.02)	25	10
L10006514573	H-6	37.4114	-121.971	FE	ND	0	UG/L	2016-03-02	ENVIRONMENTAL MONITORING (WELLS)	EDF	SANTA CLARA	2	SANTA CLARA VALLEY - SANTA CLARA (2-9.02)	25	10
L10006514573	G-10	37.4111	-121.972	FE	ND	0	UG/L	2016-08-23	ENVIRONMENTAL MONITORING (WELLS)	EDF	SANTA CLARA	2	SANTA CLARA VALLEY - SANTA CLARA (2-9.02)	25	10
SL1823a658	P-13	38.0181	-121.856	FE	=	1600	UG/L	2015-09-23	ENVIRONMENTAL MONITORING (WELLS)	EDF	CONTRA COSTA	2	PITTSBURG PLAIN (2-4)	11	7
T0600101803	MW-2	37.7683	-122.24	FE	=	580	UG/L	2014-10-03	ENVIRONMENTAL MONITORING (WELLS)	EDF	ALAMEDA	2	SANTA CLARA VALLEY - EAST BAY PLAIN (2-9.04)	18	9
T0600101803	MW-2	37.7683	-122.24	FE	=	5600	UG/L	2015-06-18	ENVIRONMENTAL MONITORING (WELLS)	EDF	ALAMEDA	2	SANTA CLARA VALLEY - EAST BAY PLAIN (2-9.04)	18	9
T0600101803	MW-2	37.7683	-122.24	FE	=	17000	UG/L	2015-06-18	ENVIRONMENTAL MONITORING (WELLS)	EDF	ALAMEDA	2	SANTA CLARA VALLEY - EAST BAY PLAIN (2-9.04)	18	9
T0600101516	F3	37.6933	-122.068	FE	=	8100	UG/L	2015-12-14	ENVIRONMENTAL MONITORING (WELLS)	EDF	ALAMEDA	2	CASTRO VALLEY (2-8)	20	10
T0608500710	MW-27	37.3482	-121.892	FE	=	230	UG/L	2015-06-23	ENVIRONMENTAL MONITORING (WELLS)	EDF	SANTA CLARA	2	SANTA CLARA VALLEY - SANTA CLARA (2-9.02)	27	15
T0600100939	MW-11	37.7322	-122.202	FE	=	13000	UG/L	2014-08-29	ENVIRONMENTAL MONITORING (WELLS)	EDF	ALAMEDA	2	SANTA CLARA VALLEY - EAST BAY PLAIN (2-9.04)	18	9
L10009353957	GW-3A-2	37.9514	-122.38	FE	=	883	UG/L	2014-05-01	ENVIRONMENTAL MONITORING (WELLS)	EDF	CONTRA COSTA	2	NO BASIN FOUND	15	9
L10009353957	GW-3A-2	37.9514	-122.38	FE	=	1440	UG/L	2015-11-05	ENVIRONMENTAL MONITORING (WELLS)	EDF	CONTRA COSTA	2	NO BASIN FOUND	15	9
L10009353957	GW-3A-2	37.9514	-122.38	FE	=	1860	UG/L	2015-01-22	ENVIRONMENTAL MONITORING (WELLS)	EDF	CONTRA COSTA	2	NO BASIN FOUND	15	9
L10009353957	GW-3A-2	37.9514	-122.38	FE	ND	0	UG/L	2015-01-22	ENVIRONMENTAL MONITORING (WELLS)	EDF	CONTRA COSTA	2	NO BASIN FOUND	15	9
L10009353957	GW-3A-2	37.9514	-122.38	FE	=	1760	UG/L	2015-05-07	ENVIRONMENTAL MONITORING (WELLS)	EDF	CONTRA COSTA	2	NO BASIN FOUND	15	9
L10009353957	GW-3A-2	37.9514	-122.38	FE	=	1660	UG/L	2015-07-14	ENVIRONMENTAL MONITORING (WELLS)	EDF	CONTRA COSTA	2	NO BASIN FOUND	15	9
T0600101016	MW-15	37.6153	-122.082	FE	=	5700	UG/L	2014-09-11	ENVIRONMENTAL MONITORING (WELLS)	EDF	ALAMEDA	2	SANTA CLARA VALLEY - EAST BAY PLAIN (2-9.04)	20	10
T10000001468	MPMW1-3	37.6273	-122.417	FE	ND	0	UG/L	2014-04-16	ENVIRONMENTAL MONITORING (WELLS)	EDF	SAN MATEO	2	WESTSIDE (2-35)	22	13
T0601300383	ESE-1	37.7766	-121.978	FE	=	15000	UG/L	2015-04-23	ENVIRONMENTAL MONITORING (WELLS)	EDF	CONTRA COSTA	2	SAN RAMON VALLEY (2-7)	16	7
T0600101410	IP-5	37.6794	-121.776	FE	ND	0	UG/L	2014-08-13	ENVIRONMENTAL MONITORING (WELLS)	EDF	ALAMEDA	2	LIVERMORE VALLEY (2-10)	16	7
T10000004547	MW-4A	37.2207	-121.977	FE	ND	0	UG/L	2015-04-09	ENVIRONMENTAL MONITORING (WELLS)	EDF	SANTA CLARA	2	SANTA CLARA VALLEY - SANTA CLARA (2-9.02)	28	15
T0609700788	MW-15S	38.2357	-122.461	FE	=	68000	UG/L	2014-03-21	ENVIRONMENTAL MONITORING (WELLS)	EDF	SONOMA	2	NAPA-SONOMA VALLEY - SONOMA VALLEY (2-2.02)	10	3
T0609700788	MW-15S	38.2357	-122.461	FE	=	32000	UG/L	2015-02-26	ENVIRONMENTAL MONITORING (WELLS)	EDF	SONOMA	2	NAPA-SONOMA VALLEY - SONOMA VALLEY (2-2.02)	10	3
T0608100147	C-10	37.6289	-122.417	FE	=	7800	UG/L	2014-01-10	ENVIRONMENTAL MONITORING (WELLS)	EDF	SAN MATEO	2	WESTSIDE (2-35)	22	13
T0608100147	C-13	37.6289	-122.417	FE	=	350	UG/L	2014-03-13	ENVIRONMENTAL MONITORING (WELLS)	EDF	SAN MATEO	2	WESTSIDE (2-35)	22	13
T0608100147	C-13	37.6289	-122.417	FE	=	4000	UG/L	2014-06-04	ENVIRONMENTAL MONITORING (WELLS)	EDF	SAN MATEO	2	WESTSIDE (2-35)	22	13
L10006514573	G-07	37.4152	-121.973	FE	ND	0	UG/L	2014-03-03	ENVIRONMENTAL MONITORING (WELLS)	EDF	SANTA CLARA	2	SANTA CLARA VALLEY - SANTA CLARA (2-9.02)	25	10
L10006514573	H-7	37.4174	-121.969	FE	=	33	UG/L	2015-08-13	ENVIRONMENTAL MONITORING (WELLS)	EDF	SANTA CLARA	2	SANTA CLARA VALLEY - SANTA CLARA (2-9.02)	25	10
L10009353957	GW-3C-1	37.9513	-122.38	FE	=	253	UG/L	2014-05-14	ENVIRONMENTAL MONITORING (WELLS)	EDF	CONTRA COSTA	2	NO BASIN FOUND	15	9
L10009353957	GW-3C-1	37.9513	-122.38	FE	ND	0	UG/L	2014-02-13	ENVIRONMENTAL MONITORING (WELLS)	EDF	CONTRA COSTA	2	NO BASIN FOUND	15	9
L10009353957	GW-3C-1	37.9513	-122.38	FE	=	450	UG/L	2015-05-07	ENVIRONMENTAL MONITORING (WELLS)	EDF	CONTRA COSTA	2	NO BASIN FOUND	15	9
L10009353957	GW-3C-1	37.9513	-122.38	FE	=	477	UG/L	2015-07-09	ENVIRONMENTAL MONITORING (WELLS)	EDF	CONTRA COSTA	2	NO BASIN FOUND	15	9
T0608553115	MW-7A	37.3636	-121.828	FE	ND	0	UG/L	2016-06-10	ENVIRONMENTAL MONITORING (WELLS)	EDF	SANTA CLARA	2	SANTA CLARA VALLEY - SANTA CLARA (2-9.02)	27	15
T0600100980	MW-5R	37.7661	-122.243	FE	=	3400	UG/L	2015-11-10	ENVIRONMENTAL MONITORING (WELLS)	EDF	ALAMEDA	2	SANTA CLARA VALLEY - EAST BAY PLAIN (2-9.04)	18	9
T0600101410	IP-8	37.6792	-121.776	FE	=	150	UG/L	2015-01-21	ENVIRONMENTAL MONITORING (WELLS)	EDF	ALAMEDA	2	LIVERMORE VALLEY (2-10)	16	7
T0600101410	IP-1	37.6793	-121.776	FE	=	600	UG/L	2014-06-10	ENVIRONMENTAL MONITORING (WELLS)	EDF	ALAMEDA	2	LIVERMORE VALLEY (2-10)	16	7
T0608501140	MW-17	37.3493	-121.895	FE	ND	0	UG/L	2014-09-25	ENVIRONMENTAL MONITORING (WELLS)	EDF	SANTA CLARA	2	SANTA CLARA VALLEY - SANTA CLARA (2-9.02)	27	15
T10000001468	MPMW5-4	37.6279	-122.416	FE	=	32000	UG/L	2014-01-14	ENVIRONMENTAL MONITORING (WELLS)	EDF	SAN MATEO	2	WESTSIDE (2-35)	22	13
T0600113164	DW-6	37.707	-121.909	FE	ND	0	UG/L	2014-03-04	ENVIRONMENTAL MONITORING (WELLS)	EDF	ALAMEDA	2	LIVERMORE VALLEY (2-10)	16	7
T0609700788	MW-17D	38.2357	-122.461	FE	=	1000	UG/L	2016-06-06	ENVIRONMENTAL MONITORING (WELLS)	EDF	SONOMA	2	NAPA-SONOMA VALLEY - SONOMA VALLEY (2-2.02)	10	3
SL1821Y617	MW-6	37.4331	-122.099	FE	=	250	UG/L	2014-12-17	ENVIRONMENTAL MONITORING (WELLS)	EDF	SANTA CLARA	2	SANTA CLARA VALLEY - SANTA CLARA (2-9.02)	24	13
SL1821Y617	MW-6	37.4331	-122.099	FE	ND	0	UG/L	2014-12-17	ENVIRONMENTAL MONITORING (WELLS)	EDF	SANTA CLARA	2	SANTA CLARA VALLEY - SANTA CLARA (2-9.02)	24	13
SL1821Y617	GW-4	37.4333	-122.099	FE	=	110	UG/L	2014-12-18	ENVIRONMENTAL MONITORING (WELLS)	EDF	SANTA CLARA	2	SANTA CLARA VALLEY - SANTA CLARA (2-9.02)	24	13
SL20210828	507C	38.0246	-121.847	FE	=	1770	UG/L	2014-03-31	ENVIRONMENTAL MONITORING (WELLS)	EDF	CONTRA COSTA	2	PITTSBURG PLAIN (2-4)	11	7
SL1823F1131	GTA-1	37.3869	-121.942	FE	=	1810	UG/L	2015-09-29	ENVIRONMENTAL MONITORING (WELLS)	EDF	SANTA CLARA	2	SANTA CLARA VALLEY - SANTA CLARA (2-9.02)	25	10
T10000003206	WS-2SL	38.2497	-122.045	FE	=	1300	UG/L	2015-10-20	ENVIRONMENTAL MONITORING (WELLS)	EDF	SOLANO	2	SUISUN-FAIRFIELD VALLEY (2-3)	11	3
T0600101016	MW-17	37.6154	-122.082	FE	=	13000	UG/L	2014-09-11	ENVIRONMENTAL MONITORING (WELLS)	EDF	ALAMEDA	2	SANTA CLARA VALLEY - EAST BAY PLAIN (2-9.04)	20	10
T0608500710	MW-26	37.3483	-121.892	FE	ND	0	UG/L	2014-01-23	ENVIRONMENTAL MONITORING (WELLS)	EDF	SANTA CLARA	2	SANTA CLARA VALLEY - SANTA CLARA (2-9.02)	27	15
T0608500710	MW-26	37.3483	-121.892	FE	ND	0	UG/L	2014-10-06	ENVIRONMENTAL MONITORING (WELLS)	EDF	SANTA CLARA	2	SANTA CLARA VALLEY - SANTA CLARA (2-9.02)	27	15
T0608500710	MW-26	37.3483	-121.892	FE	ND	0	UG/L	2015-12-02	ENVIRONMENTAL MONITORING (WELLS)	EDF	SANTA CLARA	2	SANTA CLARA VALLEY - SANTA CLARA (2-9.02)	27	15
T0608500710	MW-31	37.3489	-121.893	FE	ND	0	UG/L	2014-04-30	ENVIRONMENTAL MONITORING (WELLS)	EDF	SANTA CLARA	2	SANTA CLARA VALLEY - SANTA CLARA (2-9.02)	27	15
T0600100939	MW-13	37.7328	-122.201	FE	=	5600	UG/L	2014-08-29	ENVIRONMENTAL MONITORING (WELLS)	EDF	ALAMEDA	2	SANTA CLARA VALLEY - EAST BAY PLAIN (2-9.04)	18	9
SL18244665	GW-12A	37.9451	-122.372	FE	=	3700	UG/L	2015-08-25	ENVIRONMENTAL MONITORING (WELLS)	EDF	CONTRA COSTA	2	SANTA CLARA VALLEY - EAST BAY PLAIN (2-9.04)	15	9
L10006514573	G-13	37.4104	-121.975	FE	ND	0	UG/L	2014-02-27	ENVIRONMENTAL MONITORING (WELLS)	EDF	SANTA CLARA	2	SANTA CLARA VALLEY - SANTA CLARA (2-9.02)	25	10
L10006514573	G-4R	37.417	-121.968	FE	ND	0	UG/L	2016-03-03	ENVIRONMENTAL MONITORING (WELLS)	EDF	SANTA CLARA	2	SANTA CLARA VALLEY - SANTA CLARA (2-9.02)	25	10
L10009353957	GW-77A	37.95	-122.38	FE	=	35200	UG/L	2015-01-28	ENVIRONMENTAL MONITORING (WELLS)	EDF	CONTRA COSTA	2	NO BASIN FOUND	15	9
L10009353957	GW-77A	37.95	-122.38	FE	=	112000	UG/L	2015-07-13	ENVIRONMENTAL MONITORING (WELLS)	EDF	CONTRA COSTA	2	NO BASIN FOUND	15	9
T10000001468	MPMW1-2	37.6273	-122.417	FE	ND	0	UG/L	2014-01-14	ENVIRONMENTAL MONITORING (WELLS)	EDF	SAN MATEO	2	WESTSIDE (2-35)	22	13
T0600101410	MW-12	37.6799	-121.777	FE	=	2600	UG/L	2014-06-10	ENVIRONMENTAL MONITORING (WELLS)	EDF	ALAMEDA	2	LIVERMORE VALLEY (2-10)	16	7
SL1823K1135	MW-1	37.55	-122.052	FE	=	630	UG/L	2014-01-30	ENVIRONMENTAL MONITORING (WELLS)	EDF	ALAMEDA	2	SANTA CLARA VALLEY - NILES CONE (2-9.01)	25	10
T0608500255	C-1	37.3205	-121.972	FE	=	42	UG/L	2015-02-24	ENVIRONMENTAL MONITORING (WELLS)	EDF	SANTA CLARA	2	SANTA CLARA VALLEY - SANTA CLARA (2-9.02)	28	15
T0608500255	C-1	37.3205	-121.972	FE	ND	0	UG/L	2015-07-28	ENVIRONMENTAL MONITORING (WELLS)	EDF	SANTA CLARA	2	SANTA CLARA VALLEY - SANTA CLARA (2-9.02)	28	15
T0600101516	OW3	37.6934	-122.068	FE	=	2500	UG/L	2015-12-15	ENVIRONMENTAL MONITORING (WELLS)	EDF	ALAMEDA	2	CASTRO VALLEY (2-8)	20	10
T0600101516	OW3	37.6934	-122.068	FE	=	320	UG/L	2015-01-28	ENVIRONMENTAL MONITORING (WELLS)	EDF	ALAMEDA	2	CASTRO VALLEY (2-8)	20	10
L10009353957	CW-9	37.9445	-122.376	FE	=	5410	UG/L	2015-02-11	ENVIRONMENTAL MONITORING (WELLS)	EDF	CONTRA COSTA	2	SANTA CLARA VALLEY - EAST BAY PLAIN (2-9.04)	15	9
T0600100939	MW-14	37.7326	-122.201	FE	=	24000	UG/L	2014-08-29	ENVIRONMENTAL MONITORING (WELLS)	EDF	ALAMEDA	2	SANTA CLARA VALLEY - EAST BAY PLAIN (2-9.04)	18	9
T0600100980	MW-10	37.7662	-122.243	FE	=	42000	UG/L	2014-06-26	ENVIRONMENTAL MONITORING (WELLS)	EDF	ALAMEDA	2	SANTA CLARA VALLEY - EAST BAY PLAIN (2-9.04)	18	9
T0600100980	MW-10	37.7662	-122.243	FE	=	40000	UG/L	2015-08-10	ENVIRONMENTAL MONITORING (WELLS)	EDF	ALAMEDA	2	SANTA CLARA VALLEY - EAST BAY PLAIN (2-9.04)	18	9
SL1823K1135	MW-9	37.5498	-122.052	FE	=	8800	UG/L	2014-01-30	ENVIRONMENTAL MONITORING (WELLS)	EDF	ALAMEDA	2	SANTA CLARA VALLEY - NILES CONE (2-9.01)	25	10
SL0608125065	MW-95	37.4158	-122.219	FE	=	28000	UG/L	2014-02-19	ENVIRONMENTAL MONITORING (WELLS)	EDF	SAN MATEO	2	NO BASIN FOUND	24	13
T10000003609	CW-1B	37.9528	-122.061	FE	=	1200	UG/L	2016-05-25	ENVIRONMENTAL MONITORING (WELLS)	EDF	CONTRA COSTA	2	YGNACIO VALLEY (2-6)	14	3
T0600101803	MW-3	37.7685	-122.24	FE	=	2600	UG/L	2015-06-18	ENVIRONMENTAL MONITORING (WELLS)	EDF	ALAMEDA	2	SANTA CLARA VALLEY - EAST BAY PLAIN (2-9.04)	18	9
T10000001468	MPMW6-5	37.6278	-122.416	FE	ND	0	UG/L	2014-01-13	ENVIRONMENTAL MONITORING (WELLS)	EDF	SAN MATEO	2	WESTSIDE (2-35)	22	13
T10000001468	MPMW6-5	37.6278	-122.416	FE	=	960	UG/L	2014-07-10	ENVIRONMENTAL MONITORING (WELLS)	EDF	SAN MATEO	2	WESTSIDE (2-35)	22	13
T10000001468	MPMW6-5	37.6278	-122.416	FE	ND	0	UG/L	2014-10-14	ENVIRONMENTAL MONITORING (WELLS)	EDF	SAN MATEO	2	WESTSIDE (2-35)	22	13
T0609592162	MW-M20D	38.0593	-122.527	FE	=	930	UG/L	2014-11-12	ENVIRONMENTAL MONITORING (WELLS)	EDF	MARIN	2	NOVATO VALLEY (2-30)	10	2
T0600101483	RW-2	37.5269	-122.006	FE	=	4450	UG/L	2015-11-17	ENVIRONMENTAL MONITORING (WELLS)	EDF	ALAMEDA	2	SANTA CLARA VALLEY - NILES CONE (2-9.01)	25	10
T0600101483	RW-2	37.5269	-122.006	FE	=	1600	UG/L	2016-01-14	ENVIRONMENTAL MONITORING (WELLS)	EDF	ALAMEDA	2	SANTA CLARA VALLEY - NILES CONE (2-9.01)	25	10
T0600101483	RW-2	37.5269	-122.006	FE	=	1890	UG/L	2016-03-17	ENVIRONMENTAL MONITORING (WELLS)	EDF	ALAMEDA	2	SANTA CLARA VALLEY - NILES CONE (2-9.01)	25	10
T0600101483	RW-2	37.5269	-122.006	FE	=	3240	UG/L	2016-04-21	ENVIRONMENTAL MONITORING (WELLS)	EDF	ALAMEDA	2	SANTA CLARA VALLEY - NILES CONE (2-9.01)	25	10
T0600101866	MW-12	37.8074	-122.313	FE	=	1300	UG/L	2013-12-12	ENVIRONMENTAL MONITORING (WELLS)	EDF	ALAMEDA	2	SANTA CLARA VALLEY - EAST BAY PLAIN (2-9.04)	18	9
T10000000901	MW3	37.3515	-121.974	FE	=	102	UG/L	2014-03-03	ENVIRONMENTAL MONITORING (WELLS)	EDF	SANTA CLARA	2	SANTA CLARA VALLEY - SANTA CLARA (2-9.02)	25	10
T10000000901	MW3	37.3515	-121.974	FE	=	16.9	UG/L	2015-02-24	ENVIRONMENTAL MONITORING (WELLS)	EDF	SANTA CLARA	2	SANTA CLARA VALLEY - SANTA CLARA (2-9.02)	25	10
T10000000901	MW3	37.3515	-121.974	FE	=	127	UG/L	2014-05-28	ENVIRONMENTAL MONITORING (WELLS)	EDF	SANTA CLARA	2	SANTA CLARA VALLEY - SANTA CLARA (2-9.02)	25	10
T10000000901	MW3	37.3515	-121.974	FE	=	31	UG/L	2014-09-08	ENVIRONMENTAL MONITORING (WELLS)	EDF	SANTA CLARA	2	SANTA CLARA VALLEY - SANTA CLARA (2-9.02)	25	10
T0608100147	C-12	37.6289	-122.417	FE	ND	0	UG/L	2015-07-14	ENVIRONMENTAL MONITORING (WELLS)	EDF	SAN MATEO	2	WESTSIDE (2-35)	22	13
L10009353957	GW-61A-2	37.9467	-122.365	FE	ND	60.5	UG/L	2015-05-12	ENVIRONMENTAL MONITORING (WELLS)	EDF	CONTRA COSTA	2	SANTA CLARA VALLEY - EAST BAY PLAIN (2-9.04)	15	9
T0608500255	C-6	37.3206	-121.972	FE	=	6820	UG/L	2014-01-31	ENVIRONMENTAL MONITORING (WELLS)	EDF	SANTA CLARA	2	SANTA CLARA VALLEY - SANTA CLARA (2-9.02)	28	15
T0608500255	C-6	37.3206	-121.972	FE	=	38300	UG/L	2014-01-31	ENVIRONMENTAL MONITORING (WELLS)	EDF	SANTA CLARA	2	SANTA CLARA VALLEY - SANTA CLARA (2-9.02)	28	15
SL0608125065	MW-21	37.4174	-122.206	FE	=	4800	UG/L	2016-08-17	ENVIRONMENTAL MONITORING (WELLS)	EDF	SAN MATEO	2	SANTA CLARA VALLEY - SAN MATEO PLAIN (2-9.03)	24	13
T0608100147	C-4	37.6288	-122.417	FE	=	7900	UG/L	2014-07-16	ENVIRONMENTAL MONITORING (WELLS)	EDF	SAN MATEO	2	WESTSIDE (2-35)	22	13
T0608500710	MW-22	37.3484	-121.892	FE	=	250	UG/L	2014-04-30	ENVIRONMENTAL MONITORING (WELLS)	EDF	SANTA CLARA	2	SANTA CLARA VALLEY - SANTA CLARA (2-9.02)	27	15
T0600101486	MW-4	37.7988	-122.27	FE	ND	0	UG/L	2014-08-14	ENVIRONMENTAL MONITORING (WELLS)	EDF	ALAMEDA	2	SANTA CLARA VALLEY - EAST BAY PLAIN (2-9.04)	18	9
T0608500710	MW-18	37.3486	-121.893	FE	ND	0	UG/L	2015-09-15	ENVIRONMENTAL MONITORING (WELLS)	EDF	SANTA CLARA	2	SANTA CLARA VALLEY - SANTA CLARA (2-9.02)	27	15
T10000000901	MW4	37.3518	-121.974	FE	=	70.9	UG/L	2013-12-30	ENVIRONMENTAL MONITORING (WELLS)	EDF	SANTA CLARA	2	SANTA CLARA VALLEY - SANTA CLARA (2-9.02)	25	10
T10000000901	MW4	37.3518	-121.974	FE	=	17.7	UG/L	2014-11-25	ENVIRONMENTAL MONITORING (WELLS)	EDF	SANTA CLARA	2	SANTA CLARA VALLEY - SANTA CLARA (2-9.02)	25	10
T10000000901	MW4	37.3518	-121.974	FE	=	10.5	UG/L	2015-02-24	ENVIRONMENTAL MONITORING (WELLS)	EDF	SANTA CLARA	2	SANTA CLARA VALLEY - SANTA CLARA (2-9.02)	25	10
T10000000901	MW4	37.3518	-121.974	FE	=	17300	UG/L	2016-02-25	ENVIRONMENTAL MONITORING (WELLS)	EDF	SANTA CLARA	2	SANTA CLARA VALLEY - SANTA CLARA (2-9.02)	25	10
T10000000901	MW4	37.3518	-121.974	FE	=	133	UG/L	2016-08-23	ENVIRONMENTAL MONITORING (WELLS)	EDF	SANTA CLARA	2	SANTA CLARA VALLEY - SANTA CLARA (2-9.02)	25	10
SL1821Y617	MW-14	37.4333	-122.099	FE	ND	0	UG/L	2014-12-18	ENVIRONMENTAL MONITORING (WELLS)	EDF	SANTA CLARA	2	SANTA CLARA VALLEY - SANTA CLARA (2-9.02)	24	13
L10006514573	G-16R	37.4097	-121.968	FE	=	360	UG/L	2014-03-03	ENVIRONMENTAL MONITORING (WELLS)	EDF	SANTA CLARA	2	SANTA CLARA VALLEY - SANTA CLARA (2-9.02)	25	10
L10006514573	G-21	37.4174	-121.969	FE	ND	0	UG/L	2014-07-15	ENVIRONMENTAL MONITORING (WELLS)	EDF	SANTA CLARA	2	SANTA CLARA VALLEY - SANTA CLARA (2-9.02)	25	10
L10006514573	G-21	37.4174	-121.969	FE	=	33	UG/L	2016-03-04	ENVIRONMENTAL MONITORING (WELLS)	EDF	SANTA CLARA	2	SANTA CLARA VALLEY - SANTA CLARA (2-9.02)	25	10
W0602800625	2800625-005	38.567	-122.474	FE	<	100	UG/L	2015-12-15	WATER SUPPLY (WELLS)	DHS	NAPA	2	NO BASIN FOUND	4	3
W0602800625	2800625-003	38.538	-122.474	FE		2700	UG/L	2013-12-18	WATER SUPPLY (WELLS)	DHS	NAPA	2	NO BASIN FOUND	4	3
W0604910006	4910006-027	38.277	-122.633	FE	<	0	UG/L	2016-03-09	WATER SUPPLY (WELLS)	DHS	SONOMA	2	PETALUMA VALLEY (2-1)	10	3
W0600710002	0710002-006	38.017	-121.959	FE	<	100	UG/L	2014-01-07	WATER SUPPLY (WELLS)	DHS	CONTRA COSTA	2	NO BASIN FOUND	14	7
W0600110001	0110001-047	37.553	-122.038	FE	<	100	UG/L	2014-07-22	WATER SUPPLY (WELLS)	DHS	ALAMEDA	2	SANTA CLARA VALLEY - NILES CONE (2-9.01)	25	10
W0600110001	0110001-014	37.553	-121.999	FE	<	100	UG/L	2014-08-11	WATER SUPPLY (WELLS)	DHS	ALAMEDA	2	SANTA CLARA VALLEY - NILES CONE (2-9.01)	20	10
W0604110011	4110011-013	37.495	-122.395	FE		8900	UG/L	2015-12-16	WATER SUPPLY (WELLS)	DHS	SAN MATEO	2	NO BASIN FOUND	24	13
W0602110007	2110007-001	38.248	-122.95	FE	<	0	UG/L	2013-12-17	WATER SUPPLY (WELLS)	DHS	MARIN	2	NO BASIN FOUND	10	2
W0602110007	2110007-001	38.248	-122.95	FE		1.046	UG/L	2014-11-18	WATER SUPPLY (WELLS)	DHS	MARIN	2	NO BASIN FOUND	10	2
W0602110007	2110007-001	38.248	-122.95	FE	<	0	UG/L	2014-02-18	WATER SUPPLY (WELLS)	DHS	MARIN	2	NO BASIN FOUND	10	2
W0602110007	2110007-001	38.248	-122.95	FE	<	0	UG/L	2016-02-09	WATER SUPPLY (WELLS)	DHS	MARIN	2	NO BASIN FOUND	10	2
W0604310011	4310011-156	37.321	-121.88	FE	<	0	UG/L	2016-04-13	WATER SUPPLY (WELLS)	DHS	SANTA CLARA	2	SANTA CLARA VALLEY - SANTA CLARA (2-9.02)	27	15
W0604110028	4110028-003	37.495	-122.514	FE		2600	UG/L	2015-01-19	WATER SUPPLY (WELLS)	DHS	SAN MATEO	2	HALF MOON BAY TERRACE (2-22)	22	13
W0604110028	4110028-003	37.495	-122.514	FE		2700	UG/L	2015-07-20	WATER SUPPLY (WELLS)	DHS	SAN MATEO	2	HALF MOON BAY TERRACE (2-22)	22	13
W0604110028	4110028-003	37.495	-122.514	FE		2700	UG/L	2016-01-18	WATER SUPPLY (WELLS)	DHS	SAN MATEO	2	HALF MOON BAY TERRACE (2-22)	22	13
W0604910013	4910013-004	38.306	-122.474	FE	<	0	UG/L	2014-02-12	WATER SUPPLY (WELLS)	DHS	SONOMA	2	NO BASIN FOUND	4	2
W0602100579	2100579-003	38.075	-122.712	FE		4300	UG/L	2014-05-16	WATER SUPPLY (WELLS)	DHS	MARIN	2	NO BASIN FOUND	10	2
T0608100077	MW-6	37.6866	-122.47	FE	=	18000	UG/L	2014-11-07	ENVIRONMENTAL MONITORING (WELLS)	EDF	SAN MATEO	2	WESTSIDE (2-35)	19	11
SL0600106796	MW-13A	37.5266	-122.034	FE	=	2800	UG/L	2016-05-09	ENVIRONMENTAL MONITORING (WELLS)	EDF	ALAMEDA	2	SANTA CLARA VALLEY - NILES CONE (2-9.01)	25	10
SL0600106796	MW-13A	37.5266	-122.034	FE	ND	0	UG/L	2016-05-09	ENVIRONMENTAL MONITORING (WELLS)	EDF	ALAMEDA	2	SANTA CLARA VALLEY - NILES CONE (2-9.01)	25	10
SL18316736	T3S-MW01	38.0321	-122.08	FE	=	470000	UG/L	2014-10-07	ENVIRONMENTAL MONITORING (WELLS)	EDF	CONTRA COSTA	2	YGNACIO VALLEY (2-6)	14	7
T0608500710	MW-19	37.3487	-121.893	FE	ND	0	UG/L	2014-10-03	ENVIRONMENTAL MONITORING (WELLS)	EDF	SANTA CLARA	2	SANTA CLARA VALLEY - SANTA CLARA (2-9.02)	27	15
T0600101803	EW-4	37.7685	-122.239	FE	=	11000	UG/L	2014-06-19	ENVIRONMENTAL MONITORING (WELLS)	EDF	ALAMEDA	2	SANTA CLARA VALLEY - EAST BAY PLAIN (2-9.04)	18	9
SL18244665	GW-11C	37.9434	-122.374	FE	ND	0	UG/L	2014-10-01	ENVIRONMENTAL MONITORING (WELLS)	EDF	CONTRA COSTA	2	SANTA CLARA VALLEY - EAST BAY PLAIN (2-9.04)	15	9
SL18244665	GW-11C	37.9434	-122.374	FE	ND	0	UG/L	2015-09-24	ENVIRONMENTAL MONITORING (WELLS)	EDF	CONTRA COSTA	2	SANTA CLARA VALLEY - EAST BAY PLAIN (2-9.04)	15	9
T0601300383	ESE-5	37.7766	-121.978	FE	=	15200	UG/L	2015-06-22	ENVIRONMENTAL MONITORING (WELLS)	EDF	CONTRA COSTA	2	SAN RAMON VALLEY (2-7)	16	7
T0601300383	ESE-5	37.7766	-121.978	FE	=	2750	UG/L	2015-07-21	ENVIRONMENTAL MONITORING (WELLS)	EDF	CONTRA COSTA	2	SAN RAMON VALLEY (2-7)	16	7
T0608100661	MW-7	37.4947	-122.216	FE	=	6600	UG/L	2014-07-16	ENVIRONMENTAL MONITORING (WELLS)	EDF	SAN MATEO	2	SANTA CLARA VALLEY - SAN MATEO PLAIN (2-9.03)	22	13
T0600141337	MW-6	37.5522	-122.054	FE	=	80000	UG/L	2015-02-11	ENVIRONMENTAL MONITORING (WELLS)	EDF	ALAMEDA	2	SANTA CLARA VALLEY - NILES CONE (2-9.01)	20	10
T0600101516	C3	37.6934	-122.068	FE	=	810	UG/L	2015-12-15	ENVIRONMENTAL MONITORING (WELLS)	EDF	ALAMEDA	2	CASTRO VALLEY (2-8)	20	10
L10006514573	G-19	37.4109	-121.973	FE	=	55	UG/L	2016-08-23	ENVIRONMENTAL MONITORING (WELLS)	EDF	SANTA CLARA	2	SANTA CLARA VALLEY - SANTA CLARA (2-9.02)	25	10
T0608100147	E-1	37.6288	-122.417	FE	=	6400	UG/L	2014-02-12	ENVIRONMENTAL MONITORING (WELLS)	EDF	SAN MATEO	2	WESTSIDE (2-35)	22	13
T0608100147	E-1	37.6288	-122.417	FE	=	8000	UG/L	2014-03-13	ENVIRONMENTAL MONITORING (WELLS)	EDF	SAN MATEO	2	WESTSIDE (2-35)	22	13
T0608100147	E-1	37.6288	-122.417	FE	=	3800	UG/L	2014-04-29	ENVIRONMENTAL MONITORING (WELLS)	EDF	SAN MATEO	2	WESTSIDE (2-35)	22	13
T10000003609	CW-2B	37.9529	-122.061	FE	=	9300	UG/L	2015-12-16	ENVIRONMENTAL MONITORING (WELLS)	EDF	CONTRA COSTA	2	YGNACIO VALLEY (2-6)	14	3
T10000003609	CW-2B	37.9529	-122.061	FE	=	250	UG/L	2016-03-09	ENVIRONMENTAL MONITORING (WELLS)	EDF	CONTRA COSTA	2	YGNACIO VALLEY (2-6)	14	3
T10000003609	CW-10A	37.9536	-122.061	FE	=	510	UG/L	2016-03-10	ENVIRONMENTAL MONITORING (WELLS)	EDF	CONTRA COSTA	2	YGNACIO VALLEY (2-6)	14	3
T0600101516	C2	37.6934	-122.068	FE	=	3400	UG/L	2014-10-10	ENVIRONMENTAL MONITORING (WELLS)	EDF	ALAMEDA	2	CASTRO VALLEY (2-8)	20	10
SL20210828	115C	38.0221	-121.848	FE	=	6120	UG/L	2014-03-26	ENVIRONMENTAL MONITORING (WELLS)	EDF	CONTRA COSTA	2	PITTSBURG PLAIN (2-4)	11	7
T0600100939	IW-2	37.7328	-122.201	FE	=	10000	UG/L	2014-08-29	ENVIRONMENTAL MONITORING (WELLS)	EDF	ALAMEDA	2	SANTA CLARA VALLEY - EAST BAY PLAIN (2-9.04)	18	9
L10009353957	GW-38A	37.9539	-122.376	FE	=	493	UG/L	2014-10-28	ENVIRONMENTAL MONITORING (WELLS)	EDF	CONTRA COSTA	2	SANTA CLARA VALLEY - EAST BAY PLAIN (2-9.04)	15	9
T10000001468	MPMW2-5	37.6275	-122.416	FE	=	15000	UG/L	2016-01-13	ENVIRONMENTAL MONITORING (WELLS)	EDF	SAN MATEO	2	WESTSIDE (2-35)	22	13
T10000004547	MW-3A	37.2209	-121.977	FE	=	1000	UG/L	2015-04-09	ENVIRONMENTAL MONITORING (WELLS)	EDF	SANTA CLARA	2	SANTA CLARA VALLEY - SANTA CLARA (2-9.02)	28	15
T10000004547	MW-3A	37.2209	-121.977	FE	=	120000	UG/L	2015-04-09	ENVIRONMENTAL MONITORING (WELLS)	EDF	SANTA CLARA	2	SANTA CLARA VALLEY - SANTA CLARA (2-9.02)	28	15
W0604901275	4901275-001	38.219	-122.474	FE	<	0	UG/L	2015-06-12	WATER SUPPLY (WELLS)	DHS	SONOMA	2	NAPA-SONOMA VALLEY - SONOMA VALLEY (2-2.02)	10	3
W0604300716	4300716-003	37.176	-121.959	FE		710	UG/L	2014-10-23	WATER SUPPLY (WELLS)	DHS	SANTA CLARA	2	NO BASIN FOUND	28	15
W0604310012	4310012-004	37.35	-121.959	FE	<	100	UG/L	2015-08-17	WATER SUPPLY (WELLS)	DHS	SANTA CLARA	2	SANTA CLARA VALLEY - SANTA CLARA (2-9.02)	25	10
W0604310020	4310020-003	37.292	-121.84	FE	<	100	UG/L	2014-03-27	WATER SUPPLY (WELLS)	DHS	SANTA CLARA	2	SANTA CLARA VALLEY - SANTA CLARA (2-9.02)	27	15
W0604100533	4100533-003	37.379	-122.276	FE		110	UG/L	2013-12-12	WATER SUPPLY (WELLS)	DHS	SAN MATEO	2	NO BASIN FOUND	24	13
T0608501548	MW-7E	37.3	-121.822	FE	=	570	UG/L	2013-12-18	ENVIRONMENTAL MONITORING (WELLS)	EDF	SANTA CLARA	2	SANTA CLARA VALLEY - SANTA CLARA (2-9.02)	27	15
T06019741226	MW3	37.823	-122.286	FE	=	1850	UG/L	2015-10-06	ENVIRONMENTAL MONITORING (WELLS)	EDF	ALAMEDA	2	SANTA CLARA VALLEY - EAST BAY PLAIN (2-9.04)	18	9
T0600100406	MW-1	37.8207	-122.262	FE	=	24000	UG/L	2015-08-17	ENVIRONMENTAL MONITORING (WELLS)	EDF	ALAMEDA	2	SANTA CLARA VALLEY - EAST BAY PLAIN (2-9.04)	18	9
T0608100147	C-11	37.6289	-122.417	FE	=	1900	UG/L	2014-06-04	ENVIRONMENTAL MONITORING (WELLS)	EDF	SAN MATEO	2	WESTSIDE (2-35)	22	13
SL0600100443	MW-1	37.5505	-121.858	FE	ND	0	UG/L	2014-03-20	ENVIRONMENTAL MONITORING (WELLS)	EDF	ALAMEDA	2	NO BASIN FOUND	20	7
T0601300383	MW-11	37.7768	-121.977	FE	=	65000	UG/L	2015-02-16	ENVIRONMENTAL MONITORING (WELLS)	EDF	CONTRA COSTA	2	SAN RAMON VALLEY (2-7)	16	7
T10000003609	CW-3A	37.9532	-122.06	FE	=	4300	UG/L	2016-05-25	ENVIRONMENTAL MONITORING (WELLS)	EDF	CONTRA COSTA	2	YGNACIO VALLEY (2-6)	14	3
T0608500255	C-11R	37.321	-121.971	FE	=	270000	UG/L	2014-08-20	ENVIRONMENTAL MONITORING (WELLS)	EDF	SANTA CLARA	2	SANTA CLARA VALLEY - SANTA CLARA (2-9.02)	28	15
T10000003609	CW-2A	37.9529	-122.061	FE	=	130	UG/L	2016-03-09	ENVIRONMENTAL MONITORING (WELLS)	EDF	CONTRA COSTA	2	YGNACIO VALLEY (2-6)	14	3
T10000001468	MPMW4-3	37.6275	-122.416	FE	ND	0	UG/L	2014-01-14	ENVIRONMENTAL MONITORING (WELLS)	EDF	SAN MATEO	2	WESTSIDE (2-35)	22	13
T0601300383	MW-8	37.7768	-121.978	FE	=	1060	UG/L	2015-06-22	ENVIRONMENTAL MONITORING (WELLS)	EDF	CONTRA COSTA	2	SAN RAMON VALLEY (2-7)	16	7
L10006514573	G-17	37.4132	-121.971	FE	ND	0	UG/L	2014-07-15	ENVIRONMENTAL MONITORING (WELLS)	EDF	SANTA CLARA	2	SANTA CLARA VALLEY - SANTA CLARA (2-9.02)	25	10
T0601300383	MW-7	37.7767	-121.978	FE	=	26300	UG/L	2015-04-08	ENVIRONMENTAL MONITORING (WELLS)	EDF	CONTRA COSTA	2	SAN RAMON VALLEY (2-7)	16	7
W0602110501	2110501-004	38.046	-122.87	FE	<	100	UG/L	2014-05-13	WATER SUPPLY (WELLS)	DHS	MARIN	2	NO BASIN FOUND	10	2
W0602110501	2110501-004	38.046	-122.87	FE	<	100	UG/L	2014-06-03	WATER SUPPLY (WELLS)	DHS	MARIN	2	NO BASIN FOUND	10	2
W0602110501	2110501-004	38.046	-122.87	FE		150	UG/L	2014-10-07	WATER SUPPLY (WELLS)	DHS	MARIN	2	NO BASIN FOUND	10	2
W0602110501	2110501-004	38.046	-122.87	FE		250	UG/L	2015-02-03	WATER SUPPLY (WELLS)	DHS	MARIN	2	NO BASIN FOUND	10	2
W0602110501	2110501-004	38.046	-122.87	FE		170	UG/L	2015-06-02	WATER SUPPLY (WELLS)	DHS	MARIN	2	NO BASIN FOUND	10	2
W0602110501	2110501-004	38.046	-122.87	FE	<	100	UG/L	2016-05-10	WATER SUPPLY (WELLS)	DHS	MARIN	2	NO BASIN FOUND	10	2
W0602110006	2110006-003	38.075	-122.791	FE	<	0	UG/L	2014-06-17	WATER SUPPLY (WELLS)	DHS	MARIN	2	NO BASIN FOUND	10	2
W0602110006	2110006-003	38.075	-122.791	FE	<	0	UG/L	2015-03-24	WATER SUPPLY (WELLS)	DHS	MARIN	2	NO BASIN FOUND	10	2
W0602110006	2110006-001	38.075	-122.791	FE		0.15	UG/L	2013-12-10	WATER SUPPLY (WELLS)	DHS	MARIN	2	NO BASIN FOUND	10	2
W0602110007	2110007-008	38.248	-122.95	FE		1500	UG/L	2014-06-09	WATER SUPPLY (WELLS)	DHS	MARIN	2	WILSON GROVE FORMATION HIGHLANDS (1-59)	10	2
W0602110007	2110007-003	38.248	-122.95	FE		330	UG/L	2016-07-18	WATER SUPPLY (WELLS)	DHS	MARIN	2	WILSON GROVE FORMATION HIGHLANDS (1-59)	10	2
W0604110009	4110009-008	37.669	-122.435	FE		0.071	UG/L	2015-03-04	WATER SUPPLY (WELLS)	DHS	SAN MATEO	2	WESTSIDE (2-35)	19	13
W0604310011	4310011-136	37.321	-121.959	FE	<	100	UG/L	2014-06-09	WATER SUPPLY (WELLS)	DHS	SANTA CLARA	2	SANTA CLARA VALLEY - SANTA CLARA (2-9.02)	28	15
W0604310011	4310011-136	37.321	-121.959	FE	<	100	UG/L	2014-09-04	WATER SUPPLY (WELLS)	DHS	SANTA CLARA	2	SANTA CLARA VALLEY - SANTA CLARA (2-9.02)	28	15
W0604310011	4310011-136	37.321	-121.959	FE	<	100	UG/L	2014-12-03	WATER SUPPLY (WELLS)	DHS	SANTA CLARA	2	SANTA CLARA VALLEY - SANTA CLARA (2-9.02)	28	15
W0604310011	4310011-136	37.321	-121.959	FE	<	100	UG/L	2015-01-12	WATER SUPPLY (WELLS)	DHS	SANTA CLARA	2	SANTA CLARA VALLEY - SANTA CLARA (2-9.02)	28	15
W0604310011	4310011-136	37.321	-121.959	FE	<	0	UG/L	2015-08-05	WATER SUPPLY (WELLS)	DHS	SANTA CLARA	2	SANTA CLARA VALLEY - SANTA CLARA (2-9.02)	28	15
W0604310011	4310011-140	37.292	-121.88	FE	<	100	UG/L	2014-11-12	WATER SUPPLY (WELLS)	DHS	SANTA CLARA	2	SANTA CLARA VALLEY - SANTA CLARA (2-9.02)	27	15
W0604310011	4310011-144	37.292	-121.88	FE	<	0	UG/L	2016-06-15	WATER SUPPLY (WELLS)	DHS	SANTA CLARA	2	SANTA CLARA VALLEY - SANTA CLARA (2-9.02)	27	15
W0604300770	4300770-004	37.35	-121.761	FE		310	UG/L	2015-08-27	WATER SUPPLY (WELLS)	DHS	SANTA CLARA	2	NO BASIN FOUND	25	15
W0604300525	4300525-003	37.147	-121.959	FE		3200	UG/L	2014-02-19	WATER SUPPLY (WELLS)	DHS	SANTA CLARA	2	NO BASIN FOUND	28	15
W0604300770	4300770-003	37.35	-121.761	FE	<	0	UG/L	2015-09-23	WATER SUPPLY (WELLS)	DHS	SANTA CLARA	2	NO BASIN FOUND	25	15
W0604310011	4310011-128	37.321	-121.959	FE	<	0	UG/L	2015-07-08	WATER SUPPLY (WELLS)	DHS	SANTA CLARA	2	SANTA CLARA VALLEY - SANTA CLARA (2-9.02)	28	15
W0604310011	4310011-115	37.321	-121.88	FE		1100	UG/L	2015-03-03	WATER SUPPLY (WELLS)	DHS	SANTA CLARA	2	SANTA CLARA VALLEY - SANTA CLARA (2-9.02)	27	15
W0604310011	4310011-108	37.321	-121.84	FE	<	100	UG/L	2015-01-07	WATER SUPPLY (WELLS)	DHS	SANTA CLARA	2	SANTA CLARA VALLEY - SANTA CLARA (2-9.02)	27	15
W0604310011	4310011-028	37.321	-121.92	FE	<	100	UG/L	2014-05-16	WATER SUPPLY (WELLS)	DHS	SANTA CLARA	2	SANTA CLARA VALLEY - SANTA CLARA (2-9.02)	28	15
W0604310011	4310011-028	37.321	-121.92	FE	<	100	UG/L	2014-10-10	WATER SUPPLY (WELLS)	DHS	SANTA CLARA	2	SANTA CLARA VALLEY - SANTA CLARA (2-9.02)	28	15
W0604310011	4310011-003	37.321	-121.92	FE	<	100	UG/L	2014-08-06	WATER SUPPLY (WELLS)	DHS	SANTA CLARA	2	SANTA CLARA VALLEY - SANTA CLARA (2-9.02)	28	15
W0604310011	4310011-093	37.35	-121.88	FE		170	UG/L	2014-06-10	WATER SUPPLY (WELLS)	DHS	SANTA CLARA	2	SANTA CLARA VALLEY - SANTA CLARA (2-9.02)	27	15
W0604310011	4310011-024	37.321	-121.92	FE	<	0	UG/L	2015-06-16	WATER SUPPLY (WELLS)	DHS	SANTA CLARA	2	SANTA CLARA VALLEY - SANTA CLARA (2-9.02)	28	15
W0600110010	0110010-006	37.698	-121.88	FE	<	0	UG/L	2014-01-06	WATER SUPPLY (WELLS)	DHS	ALAMEDA	2	LIVERMORE VALLEY (2-10)	16	7
W0600110001	0110001-036	37.553	-121.999	FE	<	100	UG/L	2014-07-21	WATER SUPPLY (WELLS)	DHS	ALAMEDA	2	SANTA CLARA VALLEY - NILES CONE (2-9.01)	20	10
W0600110010	0110010-006	37.698	-121.88	FE	<	0	UG/L	2014-09-08	WATER SUPPLY (WELLS)	DHS	ALAMEDA	2	LIVERMORE VALLEY (2-10)	16	7
W0600110001	0110001-036	37.553	-121.999	FE	<	100	UG/L	2015-07-21	WATER SUPPLY (WELLS)	DHS	ALAMEDA	2	SANTA CLARA VALLEY - NILES CONE (2-9.01)	20	10
W0604910006	4910006-009	38.248	-122.633	FE		230	UG/L	2014-12-17	WATER SUPPLY (WELLS)	DHS	SONOMA	2	PETALUMA VALLEY (2-1)	10	3
W0604800596	4800596-001	38.219	-121.959	FE		330	UG/L	2014-09-17	WATER SUPPLY (WELLS)	DHS	SOLANO	2	SUISUN-FAIRFIELD VALLEY (2-3)	11	3
W0602800625	2800625-007	38.538	-122.474	FE		2100	UG/L	2013-12-18	WATER SUPPLY (WELLS)	DHS	NAPA	2	NO BASIN FOUND	4	3
W0602800625	2800625-007	38.538	-122.474	FE		480	UG/L	2014-06-24	WATER SUPPLY (WELLS)	DHS	NAPA	2	NO BASIN FOUND	4	3
W0602810012	2810012-006	38.567	-122.435	FE	<	100	UG/L	2015-03-31	WATER SUPPLY (WELLS)	DHS	NAPA	2	NO BASIN FOUND	4	3
W0600110001	0110001-009	37.553	-121.999	FE	<	100	UG/L	2015-07-07	WATER SUPPLY (WELLS)	DHS	ALAMEDA	2	SANTA CLARA VALLEY - NILES CONE (2-9.01)	20	10
W0604900533	4900533-001	38.393	-122.553	FE		200	UG/L	2015-09-23	WATER SUPPLY (WELLS)	DHS	SONOMA	2	NAPA-SONOMA VALLEY - SONOMA VALLEY (2-2.02)	4	2
W0604310011	4310011-106	37.292	-121.92	FE		210	UG/L	2014-01-10	WATER SUPPLY (WELLS)	DHS	SANTA CLARA	2	SANTA CLARA VALLEY - SANTA CLARA (2-9.02)	28	15
W0604300571	4300571-001	37.176	-121.721	FE	<	0	UG/L	2014-11-19	WATER SUPPLY (WELLS)	DHS	SANTA CLARA	2	SANTA CLARA VALLEY - SANTA CLARA (2-9.02)	29	17
W0604310001	4310001-032	37.408	-122.118	FE		3.167	UG/L	2014-12-02	WATER SUPPLY (WELLS)	DHS	SANTA CLARA	2	SANTA CLARA VALLEY - SANTA CLARA (2-9.02)	24	13
W0604310001	4310001-032	37.408	-122.118	FE		6.71	UG/L	2015-06-03	WATER SUPPLY (WELLS)	DHS	SANTA CLARA	2	SANTA CLARA VALLEY - SANTA CLARA (2-9.02)	24	13
W0604310001	4310001-032	37.408	-122.118	FE	<	0	UG/L	2016-03-08	WATER SUPPLY (WELLS)	DHS	SANTA CLARA	2	SANTA CLARA VALLEY - SANTA CLARA (2-9.02)	24	13
W0604310001	4310001-008	37.35	-122.078	FE	<	0	UG/L	2015-04-09	WATER SUPPLY (WELLS)	DHS	SANTA CLARA	2	SANTA CLARA VALLEY - SANTA CLARA (2-9.02)	24	13
W0604310018	4310018-002	37.35	-122.038	FE	<	0	UG/L	2016-01-11	WATER SUPPLY (WELLS)	DHS	SANTA CLARA	2	SANTA CLARA VALLEY - SANTA CLARA (2-9.02)	28	15
W0604310001	4310001-035	37.408	-122.118	FE		44.7	UG/L	2013-12-04	WATER SUPPLY (WELLS)	DHS	SANTA CLARA	2	SANTA CLARA VALLEY - SANTA CLARA (2-9.02)	24	13
W0600110003	0110003-007	37.669	-121.761	FE	<	0	UG/L	2014-08-14	WATER SUPPLY (WELLS)	DHS	ALAMEDA	2	LIVERMORE VALLEY (2-10)	16	7
W0602100579	2100579-001	38.046	-122.712	FE		6100	UG/L	2015-12-10	WATER SUPPLY (WELLS)	DHS	MARIN	2	NO BASIN FOUND	10	2
W0604100531	4100531-004	37.292	-122.236	FE		151.9	UG/L	2014-03-26	WATER SUPPLY (WELLS)	DHS	SAN MATEO	2	NO BASIN FOUND	24	13
W0602800525	2800525-002	38.567	-122.474	FE		110	UG/L	2014-09-08	WATER SUPPLY (WELLS)	DHS	NAPA	2	NO BASIN FOUND	4	3
W0602000573	2000573-001	38.248	-122.95	FE		3300	UG/L	2016-07-06	WATER SUPPLY (WELLS)	DHS	MARIN	2	NO BASIN FOUND	10	2
W0602801002	2801002-001	38.248	-122.316	FE		6100	UG/L	2015-04-30	WATER SUPPLY (WELLS)	DHS	NAPA	2	NAPA-SONOMA VALLEY - NAPA-SONOMA LOWLANDS (2-2.03)	4	3
W0604910012	4910012-001	38.306	-122.435	FE		120	UG/L	2014-03-17	WATER SUPPLY (WELLS)	DHS	SONOMA	2	NO BASIN FOUND	10	3
W0600707547	0707547-001	37.785	-121.761	FE	<	100	UG/L	2015-06-17	WATER SUPPLY (WELLS)	DHS	CONTRA COSTA	2	NO BASIN FOUND	14	7
W0602110007	2110007-007	38.248	-122.95	FE		1900	UG/L	2014-07-15	WATER SUPPLY (WELLS)	DHS	MARIN	2	WILSON GROVE FORMATION HIGHLANDS (1-59)	10	2
W0604310019	4310019-005	37.408	-121.92	FE		110	UG/L	2015-11-10	WATER SUPPLY (WELLS)	DHS	SANTA CLARA	2	SANTA CLARA VALLEY - SANTA CLARA (2-9.02)	25	10
W0604900563	4900563-003	38.306	-122.474	FE	<	0	UG/L	2016-06-15	WATER SUPPLY (WELLS)	DHS	SONOMA	2	NO BASIN FOUND	4	2
W0604910006	4910006-055	38.248	-122.633	FE		190	UG/L	2013-12-17	WATER SUPPLY (WELLS)	DHS	SONOMA	2	PETALUMA VALLEY (2-1)	10	3
W0604110028	4110028-002	37.524	-122.514	FE		4700	UG/L	2016-01-18	WATER SUPPLY (WELLS)	DHS	SAN MATEO	2	HALF MOON BAY TERRACE (2-22)	22	13
W0604110009	4110009-007	37.669	-122.435	FE		14.32	UG/L	2014-09-08	WATER SUPPLY (WELLS)	DHS	SAN MATEO	2	WESTSIDE (2-35)	22	13
W0604110009	4110009-007	37.669	-122.435	FE		14.16	UG/L	2014-11-04	WATER SUPPLY (WELLS)	DHS	SAN MATEO	2	WESTSIDE (2-35)	22	13
W0604110009	4110009-007	37.669	-122.435	FE		11.92	UG/L	2015-02-02	WATER SUPPLY (WELLS)	DHS	SAN MATEO	2	WESTSIDE (2-35)	22	13
T10000001468	MPMW6-3	37.6278	-122.416	FE	ND	0	UG/L	2014-04-16	ENVIRONMENTAL MONITORING (WELLS)	EDF	SAN MATEO	2	WESTSIDE (2-35)	22	13
SL18244665	B-5	37.9444	-122.372	FE	=	301	UG/L	2015-09-09	ENVIRONMENTAL MONITORING (WELLS)	EDF	CONTRA COSTA	2	SANTA CLARA VALLEY - EAST BAY PLAIN (2-9.04)	15	9
T0608100077	MW-13	37.6868	-122.471	FE	=	14000	UG/L	2014-11-07	ENVIRONMENTAL MONITORING (WELLS)	EDF	SAN MATEO	2	WESTSIDE (2-35)	19	11
T0601300383	SW-1	37.7766	-121.978	FE	=	191000	UG/L	2015-04-08	ENVIRONMENTAL MONITORING (WELLS)	EDF	CONTRA COSTA	2	SAN RAMON VALLEY (2-7)	16	7
W0604310011	4310011-023	37.321	-121.92	FE	<	0	UG/L	2016-03-28	WATER SUPPLY (WELLS)	DHS	SANTA CLARA	2	SANTA CLARA VALLEY - SANTA CLARA (2-9.02)	28	15
T10000000901	MW2	37.3506	-121.974	FE	=	22.3	UG/L	2013-12-30	ENVIRONMENTAL MONITORING (WELLS)	EDF	SANTA CLARA	2	SANTA CLARA VALLEY - SANTA CLARA (2-9.02)	25	10
T10000000666	MW-09	37.892	-122.112	FE	ND	0	UG/L	2015-12-21	ENVIRONMENTAL MONITORING (WELLS)	EDF	CONTRA COSTA	2	NO BASIN FOUND	16	7
L10006514573	G-01	37.4107	-121.969	FE	ND	0	UG/L	2015-03-05	ENVIRONMENTAL MONITORING (WELLS)	EDF	SANTA CLARA	2	SANTA CLARA VALLEY - SANTA CLARA (2-9.02)	25	10
T10000003609	CW-7B	37.9537	-122.06	FE	=	1900	UG/L	2016-08-29	ENVIRONMENTAL MONITORING (WELLS)	EDF	CONTRA COSTA	2	YGNACIO VALLEY (2-6)	14	3
L10006224883	GW-2	37.8701	-122.321	FE	ND	0	UG/L	2016-01-20	ENVIRONMENTAL MONITORING (WELLS)	EDF	ALAMEDA	2	SANTA CLARA VALLEY - EAST BAY PLAIN (2-9.04)	15	9
T0600100980	MW-4R	37.766	-122.243	FE	=	50000	UG/L	2015-11-10	ENVIRONMENTAL MONITORING (WELLS)	EDF	ALAMEDA	2	SANTA CLARA VALLEY - EAST BAY PLAIN (2-9.04)	18	9
T0609592161	MW-M14S	38.0629	-122.527	FE	=	1400	UG/L	2014-11-12	ENVIRONMENTAL MONITORING (WELLS)	EDF	MARIN	2	NOVATO VALLEY (2-30)	10	2
SL18244665	GW-19C	37.9423	-122.372	FE	ND	0	UG/L	2015-09-16	ENVIRONMENTAL MONITORING (WELLS)	EDF	CONTRA COSTA	2	SANTA CLARA VALLEY - EAST BAY PLAIN (2-9.04)	15	9
T0601300383	OW-1	37.7767	-121.978	FE	=	6160	UG/L	2015-05-13	ENVIRONMENTAL MONITORING (WELLS)	EDF	CONTRA COSTA	2	SAN RAMON VALLEY (2-7)	16	7
SL1823a658	P-19	38.0174	-121.854	FE	=	510000	UG/L	2015-09-23	ENVIRONMENTAL MONITORING (WELLS)	EDF	CONTRA COSTA	2	PITTSBURG PLAIN (2-4)	11	7
T0600101866	MW-4	37.8082	-122.316	FE	=	3000	UG/L	2013-12-13	ENVIRONMENTAL MONITORING (WELLS)	EDF	ALAMEDA	2	SANTA CLARA VALLEY - EAST BAY PLAIN (2-9.04)	18	9
T0600101516	EW3	37.6933	-122.068	FE	ND	0	UG/L	2015-12-14	ENVIRONMENTAL MONITORING (WELLS)	EDF	ALAMEDA	2	CASTRO VALLEY (2-8)	20	10
T0601300383	MW-9	37.7769	-121.978	FE	=	98800	UG/L	2015-05-13	ENVIRONMENTAL MONITORING (WELLS)	EDF	CONTRA COSTA	2	SAN RAMON VALLEY (2-7)	16	7
T0600101803	MW-4	37.7686	-122.24	FE	=	8300	UG/L	2015-06-18	ENVIRONMENTAL MONITORING (WELLS)	EDF	ALAMEDA	2	SANTA CLARA VALLEY - EAST BAY PLAIN (2-9.04)	18	9
T0608100077	MW-14	37.6873	-122.47	FE	=	180000	UG/L	2015-04-10	ENVIRONMENTAL MONITORING (WELLS)	EDF	SAN MATEO	2	WESTSIDE (2-35)	19	11
T0601300383	SW-2	37.7766	-121.978	FE	=	8040	UG/L	2015-07-20	ENVIRONMENTAL MONITORING (WELLS)	EDF	CONTRA COSTA	2	SAN RAMON VALLEY (2-7)	16	7
T0609592161	IT-PZ-9	38.0626	-122.526	FE	ND	0	UG/L	2014-11-13	ENVIRONMENTAL MONITORING (WELLS)	EDF	MARIN	2	NOVATO VALLEY (2-30)	10	2
T0600101410	DW-6	37.6798	-121.777	FE	=	2800	UG/L	2014-11-13	ENVIRONMENTAL MONITORING (WELLS)	EDF	ALAMEDA	2	LIVERMORE VALLEY (2-10)	16	7
T10000001468	MPMW2-3	37.6275	-122.416	FE	=	19000	UG/L	2014-01-13	ENVIRONMENTAL MONITORING (WELLS)	EDF	SAN MATEO	2	WESTSIDE (2-35)	22	13
T0608100661	P-2	37.4947	-122.215	FE	=	5400	UG/L	2013-12-27	ENVIRONMENTAL MONITORING (WELLS)	EDF	SAN MATEO	2	SANTA CLARA VALLEY - SAN MATEO PLAIN (2-9.03)	22	13
SL1823a658	P-10	38.017	-121.856	FE	=	1830	UG/L	2015-01-05	ENVIRONMENTAL MONITORING (WELLS)	EDF	CONTRA COSTA	2	PITTSBURG PLAIN (2-4)	11	7
T0600101410	MW-7	37.6792	-121.776	FE	=	3700	UG/L	2015-01-20	ENVIRONMENTAL MONITORING (WELLS)	EDF	ALAMEDA	2	LIVERMORE VALLEY (2-10)	16	7
T0608100147	C-2	37.629	-122.417	FE	=	520	UG/L	2014-07-16	ENVIRONMENTAL MONITORING (WELLS)	EDF	SAN MATEO	2	WESTSIDE (2-35)	22	13
T0600101486	MW-7	37.7987	-122.27	FE	ND	0	UG/L	2014-08-14	ENVIRONMENTAL MONITORING (WELLS)	EDF	ALAMEDA	2	SANTA CLARA VALLEY - EAST BAY PLAIN (2-9.04)	18	9
T0609592161	957-MW4	38.0576	-122.527	FE	ND	0	UG/L	2014-11-13	ENVIRONMENTAL MONITORING (WELLS)	EDF	MARIN	2	NOVATO VALLEY (2-30)	10	2
T0608500255	C-4	37.3207	-121.972	FE	=	2960	UG/L	2014-01-31	ENVIRONMENTAL MONITORING (WELLS)	EDF	SANTA CLARA	2	SANTA CLARA VALLEY - SANTA CLARA (2-9.02)	28	15
T0608500255	C-4	37.3207	-121.972	FE	=	6470	UG/L	2014-01-31	ENVIRONMENTAL MONITORING (WELLS)	EDF	SANTA CLARA	2	SANTA CLARA VALLEY - SANTA CLARA (2-9.02)	28	15
T0600101516	EW2	37.6934	-122.068	FE	=	1200	UG/L	2015-12-15	ENVIRONMENTAL MONITORING (WELLS)	EDF	ALAMEDA	2	CASTRO VALLEY (2-8)	20	10
T0600101516	C1	37.6933	-122.068	FE	=	5800	UG/L	2014-10-10	ENVIRONMENTAL MONITORING (WELLS)	EDF	ALAMEDA	2	CASTRO VALLEY (2-8)	20	10
T0600101516	C1	37.6933	-122.068	FE	=	5900	UG/L	2015-01-28	ENVIRONMENTAL MONITORING (WELLS)	EDF	ALAMEDA	2	CASTRO VALLEY (2-8)	20	10
L10009353957	GW-78A	37.9476	-122.38	FE	ND	138	UG/L	2014-10-21	ENVIRONMENTAL MONITORING (WELLS)	EDF	CONTRA COSTA	2	NO BASIN FOUND	15	9
T0601300383	SW-4	37.7767	-121.978	FE	=	82900	UG/L	2015-04-08	ENVIRONMENTAL MONITORING (WELLS)	EDF	CONTRA COSTA	2	SAN RAMON VALLEY (2-7)	16	7
L10009353957	CW-6	37.9514	-122.38	FE	=	2140	UG/L	2014-02-19	ENVIRONMENTAL MONITORING (WELLS)	EDF	CONTRA COSTA	2	NO BASIN FOUND	15	9
L10009353957	CW-6	37.9514	-122.38	FE	=	2480	UG/L	2014-02-19	ENVIRONMENTAL MONITORING (WELLS)	EDF	CONTRA COSTA	2	NO BASIN FOUND	15	9
L10009353957	CW-6	37.9514	-122.38	FE	ND	0	UG/L	2014-11-13	ENVIRONMENTAL MONITORING (WELLS)	EDF	CONTRA COSTA	2	NO BASIN FOUND	15	9
L10009353957	CW-6	37.9514	-122.38	FE	=	3320	UG/L	2014-05-28	ENVIRONMENTAL MONITORING (WELLS)	EDF	CONTRA COSTA	2	NO BASIN FOUND	15	9
L10009353957	CW-6	37.9514	-122.38	FE	=	1670	UG/L	2014-11-13	ENVIRONMENTAL MONITORING (WELLS)	EDF	CONTRA COSTA	2	NO BASIN FOUND	15	9
L10009353957	CW-6	37.9514	-122.38	FE	=	1360	UG/L	2015-12-02	ENVIRONMENTAL MONITORING (WELLS)	EDF	CONTRA COSTA	2	NO BASIN FOUND	15	9
T0600101516	OW4	37.6933	-122.068	FE	=	6400	UG/L	2014-10-09	ENVIRONMENTAL MONITORING (WELLS)	EDF	ALAMEDA	2	CASTRO VALLEY (2-8)	20	10
L10006514573	G-12	37.4114	-121.971	FE	ND	0	UG/L	2014-07-18	ENVIRONMENTAL MONITORING (WELLS)	EDF	SANTA CLARA	2	SANTA CLARA VALLEY - SANTA CLARA (2-9.02)	25	10
T06019741226	MW2	37.8228	-122.286	FE	=	799	UG/L	2015-10-06	ENVIRONMENTAL MONITORING (WELLS)	EDF	ALAMEDA	2	SANTA CLARA VALLEY - EAST BAY PLAIN (2-9.04)	18	9
T06019741226	MW2	37.8228	-122.286	FE	ND	0	UG/L	2015-10-06	ENVIRONMENTAL MONITORING (WELLS)	EDF	ALAMEDA	2	SANTA CLARA VALLEY - EAST BAY PLAIN (2-9.04)	18	9
L10006514573	G-12	37.4114	-121.971	FE	=	36	UG/L	2016-03-02	ENVIRONMENTAL MONITORING (WELLS)	EDF	SANTA CLARA	2	SANTA CLARA VALLEY - SANTA CLARA (2-9.02)	25	10
T10000003609	CW-8B	37.9538	-122.061	FE	=	3800	UG/L	2015-12-16	ENVIRONMENTAL MONITORING (WELLS)	EDF	CONTRA COSTA	2	YGNACIO VALLEY (2-6)	14	3
T0609700943	MW-12	38.2498	-122.625	FE	=	78000	UG/L	2014-11-06	ENVIRONMENTAL MONITORING (WELLS)	EDF	SONOMA	2	PETALUMA VALLEY (2-1)	10	3
T0600113164	DW-5	37.7073	-121.909	FE	=	2710	UG/L	2014-03-04	ENVIRONMENTAL MONITORING (WELLS)	EDF	ALAMEDA	2	LIVERMORE VALLEY (2-10)	16	7
SL0600165101	MW-1	37.552	-122.055	FE	ND	0	UG/L	2014-11-05	ENVIRONMENTAL MONITORING (WELLS)	EDF	ALAMEDA	2	SANTA CLARA VALLEY - NILES CONE (2-9.01)	20	10
T0600101516	OW6	37.6933	-122.068	FE	=	11000	UG/L	2015-01-28	ENVIRONMENTAL MONITORING (WELLS)	EDF	ALAMEDA	2	CASTRO VALLEY (2-8)	20	10
T0600101803	MW-1	37.7684	-122.239	FE	=	370000	UG/L	2014-06-19	ENVIRONMENTAL MONITORING (WELLS)	EDF	ALAMEDA	2	SANTA CLARA VALLEY - EAST BAY PLAIN (2-9.04)	18	9
L10009353957	GW-63C	37.9539	-122.379	FE	=	302	UG/L	2015-07-23	ENVIRONMENTAL MONITORING (WELLS)	EDF	CONTRA COSTA	2	SANTA CLARA VALLEY - EAST BAY PLAIN (2-9.04)	15	9
T10000003609	CW-7A	37.9537	-122.06	FE	=	1200	UG/L	2015-12-16	ENVIRONMENTAL MONITORING (WELLS)	EDF	CONTRA COSTA	2	YGNACIO VALLEY (2-6)	14	3
SL1821Y617	MW-1	37.4324	-122.1	FE	ND	0	UG/L	2014-12-17	ENVIRONMENTAL MONITORING (WELLS)	EDF	SANTA CLARA	2	SANTA CLARA VALLEY - SANTA CLARA (2-9.02)	24	13
T0600101866	MW-9	37.8079	-122.315	FE	=	4800	UG/L	2013-12-13	ENVIRONMENTAL MONITORING (WELLS)	EDF	ALAMEDA	2	SANTA CLARA VALLEY - EAST BAY PLAIN (2-9.04)	18	9
T0600101410	DW-7	37.6798	-121.777	FE	=	1800	UG/L	2015-01-20	ENVIRONMENTAL MONITORING (WELLS)	EDF	ALAMEDA	2	LIVERMORE VALLEY (2-10)	16	7
T10000001468	MPMW5-3	37.6279	-122.416	FE	=	72000	UG/L	2015-01-13	ENVIRONMENTAL MONITORING (WELLS)	EDF	SAN MATEO	2	WESTSIDE (2-35)	22	13
T10000003609	CW-10B	37.9536	-122.061	FE	=	390	UG/L	2016-08-29	ENVIRONMENTAL MONITORING (WELLS)	EDF	CONTRA COSTA	2	YGNACIO VALLEY (2-6)	14	3
SL18244665	GW-26C	37.9422	-122.375	FE	=	287	UG/L	2014-09-29	ENVIRONMENTAL MONITORING (WELLS)	EDF	CONTRA COSTA	2	SANTA CLARA VALLEY - EAST BAY PLAIN (2-9.04)	15	9
SL0608183007	MW-1B	37.4882	-122.235	FE	=	6800	UG/L	2016-04-14	ENVIRONMENTAL MONITORING (WELLS)	EDF	SAN MATEO	2	SANTA CLARA VALLEY - SAN MATEO PLAIN (2-9.03)	22	13
SL20210828	507B1	38.0246	-121.847	FE	=	3920	UG/L	2015-04-17	ENVIRONMENTAL MONITORING (WELLS)	EDF	CONTRA COSTA	2	PITTSBURG PLAIN (2-4)	11	7
T0600101016	MW-6	37.6153	-122.082	FE	=	11000	UG/L	2015-10-02	ENVIRONMENTAL MONITORING (WELLS)	EDF	ALAMEDA	2	SANTA CLARA VALLEY - EAST BAY PLAIN (2-9.04)	20	10
T0601300383	ESE-3	37.7766	-121.978	FE	=	12100	UG/L	2015-02-16	ENVIRONMENTAL MONITORING (WELLS)	EDF	CONTRA COSTA	2	SAN RAMON VALLEY (2-7)	16	7
T0609700788	MW-15D	38.2357	-122.461	FE	=	2500	UG/L	2014-03-21	ENVIRONMENTAL MONITORING (WELLS)	EDF	SONOMA	2	NAPA-SONOMA VALLEY - SONOMA VALLEY (2-2.02)	10	3
T0609700788	MW-15D	38.2357	-122.461	FE	=	4500	UG/L	2014-10-16	ENVIRONMENTAL MONITORING (WELLS)	EDF	SONOMA	2	NAPA-SONOMA VALLEY - SONOMA VALLEY (2-2.02)	10	3
T0608164698	MW-4	37.5887	-122.363	FE	=	2800	UG/L	2014-03-12	ENVIRONMENTAL MONITORING (WELLS)	EDF	SAN MATEO	2	WESTSIDE (2-35)	22	13
SL18244665	GW-40C	37.9456	-122.373	FE	ND	0	UG/L	2015-10-05	ENVIRONMENTAL MONITORING (WELLS)	EDF	CONTRA COSTA	2	SANTA CLARA VALLEY - EAST BAY PLAIN (2-9.04)	15	9
SL18244665	GW-40C	37.9456	-122.373	FE	ND	70	UG/L	2015-10-05	ENVIRONMENTAL MONITORING (WELLS)	EDF	CONTRA COSTA	2	SANTA CLARA VALLEY - EAST BAY PLAIN (2-9.04)	15	9
T10000000666	MW-06	37.8921	-122.112	FE	=	2500	UG/L	2015-11-03	ENVIRONMENTAL MONITORING (WELLS)	EDF	CONTRA COSTA	2	NO BASIN FOUND	16	7
T10000000666	MW-06	37.8921	-122.112	FE	=	11000	UG/L	2016-06-24	ENVIRONMENTAL MONITORING (WELLS)	EDF	CONTRA COSTA	2	NO BASIN FOUND	16	7
SL720501209	VW-006	37.4131	-122.148	FE	=	5500	UG/L	2015-08-05	ENVIRONMENTAL MONITORING (WELLS)	EDF	SANTA CLARA	2	SANTA CLARA VALLEY - SANTA CLARA (2-9.02)	24	13
W0604910013	4910013-001	38.335	-122.474	FE		580	UG/L	2014-02-12	WATER SUPPLY (WELLS)	DHS	SONOMA	2	NO BASIN FOUND	4	2
W0604310011	4310011-100	37.292	-121.92	FE		100	UG/L	2014-07-15	WATER SUPPLY (WELLS)	DHS	SANTA CLARA	2	SANTA CLARA VALLEY - SANTA CLARA (2-9.02)	28	15
W0604310001	4310001-011	37.35	-122.078	FE	<	0	UG/L	2014-09-09	WATER SUPPLY (WELLS)	DHS	SANTA CLARA	2	SANTA CLARA VALLEY - SANTA CLARA (2-9.02)	24	13
W0604310011	4310011-105	37.292	-121.92	FE	<	100	UG/L	2014-01-10	WATER SUPPLY (WELLS)	DHS	SANTA CLARA	2	SANTA CLARA VALLEY - SANTA CLARA (2-9.02)	28	15
W0604310011	4310011-103	37.292	-121.92	FE	<	0	UG/L	2015-06-17	WATER SUPPLY (WELLS)	DHS	SANTA CLARA	2	SANTA CLARA VALLEY - SANTA CLARA (2-9.02)	28	15
W0604310011	4310011-103	37.292	-121.92	FE		710	UG/L	2016-02-04	WATER SUPPLY (WELLS)	DHS	SANTA CLARA	2	SANTA CLARA VALLEY - SANTA CLARA (2-9.02)	28	15
W0604310020	4310020-012	37.205	-121.721	FE		1000	UG/L	2014-02-18	WATER SUPPLY (WELLS)	DHS	SANTA CLARA	2	SANTA CLARA VALLEY - SANTA CLARA (2-9.02)	29	17
W0604310020	4310020-012	37.205	-121.721	FE		320	UG/L	2015-01-27	WATER SUPPLY (WELLS)	DHS	SANTA CLARA	2	SANTA CLARA VALLEY - SANTA CLARA (2-9.02)	29	17
W0604310011	4310011-013	37.263	-121.88	FE		100	UG/L	2016-03-10	WATER SUPPLY (WELLS)	DHS	SANTA CLARA	2	SANTA CLARA VALLEY - SANTA CLARA (2-9.02)	28	15
W0604310011	4310011-013	37.263	-121.88	FE	<	0	UG/L	2016-04-20	WATER SUPPLY (WELLS)	DHS	SANTA CLARA	2	SANTA CLARA VALLEY - SANTA CLARA (2-9.02)	28	15
W0604310020	4310020-006	37.263	-121.801	FE	<	100	UG/L	2014-01-21	WATER SUPPLY (WELLS)	DHS	SANTA CLARA	2	SANTA CLARA VALLEY - SANTA CLARA (2-9.02)	27	17
W0604300986	4300986-001	37.176	-121.761	FE	<	100	UG/L	2014-03-19	WATER SUPPLY (WELLS)	DHS	SANTA CLARA	2	NO BASIN FOUND	29	17
W0604110020	4110020-006	37.466	-122.157	FE		120	UG/L	2014-10-21	WATER SUPPLY (WELLS)	DHS	SAN MATEO	2	SANTA CLARA VALLEY - SAN MATEO PLAIN (2-9.03)	24	13
W0604110020	4110020-006	37.466	-122.157	FE	<	0	UG/L	2014-02-18	WATER SUPPLY (WELLS)	DHS	SAN MATEO	2	SANTA CLARA VALLEY - SAN MATEO PLAIN (2-9.03)	24	13
W0604110020	4110020-006	37.466	-122.157	FE		86	UG/L	2015-09-08	WATER SUPPLY (WELLS)	DHS	SAN MATEO	2	SANTA CLARA VALLEY - SAN MATEO PLAIN (2-9.03)	24	13
W0604110020	4110020-006	37.466	-122.157	FE		160	UG/L	2016-02-16	WATER SUPPLY (WELLS)	DHS	SAN MATEO	2	SANTA CLARA VALLEY - SAN MATEO PLAIN (2-9.03)	24	13
W0604110020	4110020-006	37.466	-122.157	FE		230	UG/L	2016-04-19	WATER SUPPLY (WELLS)	DHS	SAN MATEO	2	SANTA CLARA VALLEY - SAN MATEO PLAIN (2-9.03)	24	13
W0604310014	4310014-006	37.35	-122.038	FE	<	0	UG/L	2014-03-05	WATER SUPPLY (WELLS)	DHS	SANTA CLARA	2	SANTA CLARA VALLEY - SANTA CLARA (2-9.02)	24	13
W0602110006	2110006-004	38.075	-122.791	FE	<	100	UG/L	2015-02-05	WATER SUPPLY (WELLS)	DHS	MARIN	2	NO BASIN FOUND	10	2
W0602801029	2801029-002	38.393	-122.316	FE		320	UG/L	2014-02-05	WATER SUPPLY (WELLS)	DHS	NAPA	2	NO BASIN FOUND	4	3
W0604910022	4910022-004	38.335	-122.672	FE		350	UG/L	2016-06-20	WATER SUPPLY (WELLS)	DHS	SONOMA	2	SANTA ROSA VALLEY - SANTA ROSA PLAIN (1-55.01)	4	3
W0604410016	4410016-004	37.234	-122.078	FE		2100	UG/L	2015-09-09	WATER SUPPLY (WELLS)	DHS	SANTA CLARA	2	NO BASIN FOUND	28	15
SL1821Y617	MW-1D	37.4324	-122.1	FE	=	1300	UG/L	2014-12-17	ENVIRONMENTAL MONITORING (WELLS)	EDF	SANTA CLARA	2	SANTA CLARA VALLEY - SANTA CLARA (2-9.02)	24	13
SL1821Y617	MW-12	37.4328	-122.099	FE	ND	0	UG/L	2014-12-19	ENVIRONMENTAL MONITORING (WELLS)	EDF	SANTA CLARA	2	SANTA CLARA VALLEY - SANTA CLARA (2-9.02)	24	13
SL1823a658	P-3	38.0164	-121.853	FE	=	6070	UG/L	2015-01-05	ENVIRONMENTAL MONITORING (WELLS)	EDF	CONTRA COSTA	2	PITTSBURG PLAIN (2-4)	11	7
L10006514573	G-08	37.4157	-121.974	FE	=	1300	UG/L	2015-03-05	ENVIRONMENTAL MONITORING (WELLS)	EDF	SANTA CLARA	2	SANTA CLARA VALLEY - SANTA CLARA (2-9.02)	25	10
T0608100077	MW-10	37.6868	-122.47	FE	=	22800	UG/L	2015-04-09	ENVIRONMENTAL MONITORING (WELLS)	EDF	SAN MATEO	2	WESTSIDE (2-35)	19	11
T0608100077	MW-10	37.6868	-122.47	FE	=	16700	UG/L	2015-09-16	ENVIRONMENTAL MONITORING (WELLS)	EDF	SAN MATEO	2	WESTSIDE (2-35)	19	11
SL1823a658	P-13	38.0181	-121.856	FE	=	1070	UG/L	2015-01-05	ENVIRONMENTAL MONITORING (WELLS)	EDF	CONTRA COSTA	2	PITTSBURG PLAIN (2-4)	11	7
T0600101803	MW-2	37.7683	-122.24	FE	=	23000	UG/L	2014-06-19	ENVIRONMENTAL MONITORING (WELLS)	EDF	ALAMEDA	2	SANTA CLARA VALLEY - EAST BAY PLAIN (2-9.04)	18	9
L10009353957	GW-38C	37.9539	-122.376	FE	=	1910	UG/L	2015-10-20	ENVIRONMENTAL MONITORING (WELLS)	EDF	CONTRA COSTA	2	SANTA CLARA VALLEY - EAST BAY PLAIN (2-9.04)	15	9
T0608500710	MW-27	37.3482	-121.892	FE	=	170	UG/L	2015-12-03	ENVIRONMENTAL MONITORING (WELLS)	EDF	SANTA CLARA	2	SANTA CLARA VALLEY - SANTA CLARA (2-9.02)	27	15
T0600101410	IP-10	37.6792	-121.776	FE	=	1100	UG/L	2014-01-22	ENVIRONMENTAL MONITORING (WELLS)	EDF	ALAMEDA	2	LIVERMORE VALLEY (2-10)	16	7
T0600101410	IP-10	37.6792	-121.776	FE	=	1300	UG/L	2014-08-13	ENVIRONMENTAL MONITORING (WELLS)	EDF	ALAMEDA	2	LIVERMORE VALLEY (2-10)	16	7
L10009353957	GW-3A-2	37.9514	-122.38	FE	ND	0	UG/L	2014-01-23	ENVIRONMENTAL MONITORING (WELLS)	EDF	CONTRA COSTA	2	NO BASIN FOUND	15	9
T0600101016	MW-15	37.6153	-122.082	FE	=	5900	UG/L	2014-03-31	ENVIRONMENTAL MONITORING (WELLS)	EDF	ALAMEDA	2	SANTA CLARA VALLEY - EAST BAY PLAIN (2-9.04)	20	10
L10009353957	GW-3A-2	37.9514	-122.38	FE	ND	0	UG/L	2015-11-05	ENVIRONMENTAL MONITORING (WELLS)	EDF	CONTRA COSTA	2	NO BASIN FOUND	15	9
T0601300383	ESE-1	37.7766	-121.978	FE	ND	0	UG/L	2015-03-20	ENVIRONMENTAL MONITORING (WELLS)	EDF	CONTRA COSTA	2	SAN RAMON VALLEY (2-7)	16	7
T0600101410	IP-5	37.6794	-121.776	FE	ND	0	UG/L	2014-11-12	ENVIRONMENTAL MONITORING (WELLS)	EDF	ALAMEDA	2	LIVERMORE VALLEY (2-10)	16	7
SL1821Y617	GW-5	37.433	-122.1	FE	ND	0	UG/L	2014-12-18	ENVIRONMENTAL MONITORING (WELLS)	EDF	SANTA CLARA	2	SANTA CLARA VALLEY - SANTA CLARA (2-9.02)	24	13
T10000004547	MW-1B	37.2209	-121.977	FE	=	14000	UG/L	2015-04-09	ENVIRONMENTAL MONITORING (WELLS)	EDF	SANTA CLARA	2	SANTA CLARA VALLEY - SANTA CLARA (2-9.02)	28	15
T0608100077	MW-8	37.6864	-122.47	FE	=	4820	UG/L	2015-09-16	ENVIRONMENTAL MONITORING (WELLS)	EDF	SAN MATEO	2	WESTSIDE (2-35)	19	11
T0608501548	MW-8-P	37.3003	-121.822	FE	=	2000	UG/L	2013-12-18	ENVIRONMENTAL MONITORING (WELLS)	EDF	SANTA CLARA	2	SANTA CLARA VALLEY - SANTA CLARA (2-9.02)	27	15
SL20210828	510A	38.0229	-121.848	FE	ND	0	UG/L	2014-03-26	ENVIRONMENTAL MONITORING (WELLS)	EDF	CONTRA COSTA	2	PITTSBURG PLAIN (2-4)	11	7
T0608100661	MW-4	37.4938	-122.215	FE	=	990	UG/L	2015-08-28	ENVIRONMENTAL MONITORING (WELLS)	EDF	SAN MATEO	2	SANTA CLARA VALLEY - SAN MATEO PLAIN (2-9.03)	22	13
T0608501548	MW-10D2	37.3002	-121.822	FE	=	530	UG/L	2013-12-18	ENVIRONMENTAL MONITORING (WELLS)	EDF	SANTA CLARA	2	SANTA CLARA VALLEY - SANTA CLARA (2-9.02)	27	15
T0600100939	IW-3	37.7328	-122.201	FE	=	16000	UG/L	2014-08-29	ENVIRONMENTAL MONITORING (WELLS)	EDF	ALAMEDA	2	SANTA CLARA VALLEY - EAST BAY PLAIN (2-9.04)	18	9
T0608100147	C-10	37.6289	-122.417	FE	=	6400	UG/L	2015-04-21	ENVIRONMENTAL MONITORING (WELLS)	EDF	SAN MATEO	2	WESTSIDE (2-35)	22	13
T0608100147	C-13	37.6289	-122.417	FE	=	640	UG/L	2014-02-12	ENVIRONMENTAL MONITORING (WELLS)	EDF	SAN MATEO	2	WESTSIDE (2-35)	22	13
T0608100147	C-13	37.6289	-122.417	FE	=	5400	UG/L	2014-07-16	ENVIRONMENTAL MONITORING (WELLS)	EDF	SAN MATEO	2	WESTSIDE (2-35)	22	13
L10006514573	H-7	37.4174	-121.969	FE	ND	0	UG/L	2014-07-15	ENVIRONMENTAL MONITORING (WELLS)	EDF	SANTA CLARA	2	SANTA CLARA VALLEY - SANTA CLARA (2-9.02)	25	10
L10009353957	GW-3C-1	37.9513	-122.38	FE	=	462	UG/L	2014-10-23	ENVIRONMENTAL MONITORING (WELLS)	EDF	CONTRA COSTA	2	NO BASIN FOUND	15	9
L10009353957	GW-3C-1	37.9513	-122.38	FE	ND	0	UG/L	2014-10-23	ENVIRONMENTAL MONITORING (WELLS)	EDF	CONTRA COSTA	2	NO BASIN FOUND	15	9
T0608100572	MW-33B	37.5524	-122.315	FE	=	9400	UG/L	2014-01-02	ENVIRONMENTAL MONITORING (WELLS)	EDF	SAN MATEO	2	SANTA CLARA VALLEY - SAN MATEO PLAIN (2-9.03)	22	13
L10006514573	G-15	37.4043	-121.972	FE	ND	0	UG/L	2015-08-11	ENVIRONMENTAL MONITORING (WELLS)	EDF	SANTA CLARA	2	SANTA CLARA VALLEY - SANTA CLARA (2-9.02)	25	10
SL1821Y617	MW-6D	37.4332	-122.099	FE	=	160	UG/L	2014-12-17	ENVIRONMENTAL MONITORING (WELLS)	EDF	SANTA CLARA	2	SANTA CLARA VALLEY - SANTA CLARA (2-9.02)	24	13
T10000001468	MPMW5-4	37.6279	-122.416	FE	=	110000	UG/L	2014-04-18	ENVIRONMENTAL MONITORING (WELLS)	EDF	SAN MATEO	2	WESTSIDE (2-35)	22	13
T10000001468	MPMW5-4	37.6279	-122.416	FE	=	130000	UG/L	2014-07-09	ENVIRONMENTAL MONITORING (WELLS)	EDF	SAN MATEO	2	WESTSIDE (2-35)	22	13
T10000001468	MPMW2-2	37.6275	-122.416	FE	=	160000	UG/L	2014-01-13	ENVIRONMENTAL MONITORING (WELLS)	EDF	SAN MATEO	2	WESTSIDE (2-35)	22	13
SL1821Y617	GW-4	37.4333	-122.099	FE	ND	0	UG/L	2014-12-18	ENVIRONMENTAL MONITORING (WELLS)	EDF	SANTA CLARA	2	SANTA CLARA VALLEY - SANTA CLARA (2-9.02)	24	13
T0600101016	MW-17	37.6154	-122.082	FE	=	3200	UG/L	2014-03-31	ENVIRONMENTAL MONITORING (WELLS)	EDF	ALAMEDA	2	SANTA CLARA VALLEY - EAST BAY PLAIN (2-9.04)	20	10
T0600100980	MW-13	37.766	-122.243	FE	=	2700	UG/L	2015-11-11	ENVIRONMENTAL MONITORING (WELLS)	EDF	ALAMEDA	2	SANTA CLARA VALLEY - EAST BAY PLAIN (2-9.04)	18	9
T0608500710	MW-26	37.3483	-121.892	FE	ND	0	UG/L	2015-06-19	ENVIRONMENTAL MONITORING (WELLS)	EDF	SANTA CLARA	2	SANTA CLARA VALLEY - SANTA CLARA (2-9.02)	27	15
T0608500710	MW-31	37.3489	-121.893	FE	ND	0	UG/L	2015-09-14	ENVIRONMENTAL MONITORING (WELLS)	EDF	SANTA CLARA	2	SANTA CLARA VALLEY - SANTA CLARA (2-9.02)	27	15
SL0600106796	MW-24A	37.5267	-122.034	FE	=	94000	UG/L	2016-05-09	ENVIRONMENTAL MONITORING (WELLS)	EDF	ALAMEDA	2	SANTA CLARA VALLEY - NILES CONE (2-9.01)	25	10
T0609700788	MW-17S	38.2357	-122.461	FE	ND	0	UG/L	2015-02-25	ENVIRONMENTAL MONITORING (WELLS)	EDF	SONOMA	2	NAPA-SONOMA VALLEY - SONOMA VALLEY (2-2.02)	10	3
T10000000901	MW11A	37.3508	-121.975	FE	=	23.9	UG/L	2016-02-25	ENVIRONMENTAL MONITORING (WELLS)	EDF	SANTA CLARA	2	SANTA CLARA VALLEY - SANTA CLARA (2-9.02)	25	10
T0608164698	S-1	37.5886	-122.363	FE	=	5000	UG/L	2014-03-12	ENVIRONMENTAL MONITORING (WELLS)	EDF	SAN MATEO	2	WESTSIDE (2-35)	22	13
T10000001468	MPMW4-4	37.6275	-122.416	FE	ND	0	UG/L	2014-01-14	ENVIRONMENTAL MONITORING (WELLS)	EDF	SAN MATEO	2	WESTSIDE (2-35)	22	13
T10000001468	MPMW4-4	37.6275	-122.416	FE	ND	0	UG/L	2015-01-14	ENVIRONMENTAL MONITORING (WELLS)	EDF	SAN MATEO	2	WESTSIDE (2-35)	22	13
L10009353957	GW-77A	37.95	-122.38	FE	=	97700	UG/L	2014-08-11	ENVIRONMENTAL MONITORING (WELLS)	EDF	CONTRA COSTA	2	NO BASIN FOUND	15	9
L10009353957	GW-77A	37.95	-122.38	FE	=	102000	UG/L	2014-10-20	ENVIRONMENTAL MONITORING (WELLS)	EDF	CONTRA COSTA	2	NO BASIN FOUND	15	9
T0608553115	MW-8A	37.3635	-121.828	FE	ND	0	UG/L	2016-06-09	ENVIRONMENTAL MONITORING (WELLS)	EDF	SANTA CLARA	2	SANTA CLARA VALLEY - SANTA CLARA (2-9.02)	27	15
T0600101516	OW3	37.6934	-122.068	FE	=	510	UG/L	2015-12-15	ENVIRONMENTAL MONITORING (WELLS)	EDF	ALAMEDA	2	CASTRO VALLEY (2-8)	20	10
L10009353957	CW-9	37.9445	-122.376	FE	=	2370	UG/L	2015-12-02	ENVIRONMENTAL MONITORING (WELLS)	EDF	CONTRA COSTA	2	SANTA CLARA VALLEY - EAST BAY PLAIN (2-9.04)	15	9
SL18244665	GW-14A	37.9445	-122.37	FE	ND	0	UG/L	2015-09-10	ENVIRONMENTAL MONITORING (WELLS)	EDF	CONTRA COSTA	2	SANTA CLARA VALLEY - EAST BAY PLAIN (2-9.04)	15	9
SL0608125065	MW-95	37.4158	-122.219	FE	=	28000	UG/L	2015-03-03	ENVIRONMENTAL MONITORING (WELLS)	EDF	SAN MATEO	2	NO BASIN FOUND	24	13
L10006224883	GW-1(A)	37.873	-122.323	FE	=	5000	UG/L	2016-07-18	ENVIRONMENTAL MONITORING (WELLS)	EDF	NO COUNTY FOUND	2	SANTA CLARA VALLEY - EAST BAY PLAIN (2-9.04)	15	9
T10000003609	CW-1B	37.9528	-122.061	FE	=	2400	UG/L	2016-08-29	ENVIRONMENTAL MONITORING (WELLS)	EDF	CONTRA COSTA	2	YGNACIO VALLEY (2-6)	14	3
T10000000901	MW11	37.3508	-121.975	FE	=	2300	UG/L	2016-08-23	ENVIRONMENTAL MONITORING (WELLS)	EDF	SANTA CLARA	2	SANTA CLARA VALLEY - SANTA CLARA (2-9.02)	25	10
T10000000901	MW3	37.3515	-121.974	FE	=	21.5	UG/L	2013-12-30	ENVIRONMENTAL MONITORING (WELLS)	EDF	SANTA CLARA	2	SANTA CLARA VALLEY - SANTA CLARA (2-9.02)	25	10
T10000000901	MW3	37.3515	-121.974	FE	=	2880	UG/L	2015-06-04	ENVIRONMENTAL MONITORING (WELLS)	EDF	SANTA CLARA	2	SANTA CLARA VALLEY - SANTA CLARA (2-9.02)	25	10
T10000000901	MW3	37.3515	-121.974	FE	=	1.83	UG/L	2015-08-26	ENVIRONMENTAL MONITORING (WELLS)	EDF	SANTA CLARA	2	SANTA CLARA VALLEY - SANTA CLARA (2-9.02)	25	10
T0608100147	C-12	37.6289	-122.417	FE	=	2800	UG/L	2015-06-18	ENVIRONMENTAL MONITORING (WELLS)	EDF	SAN MATEO	2	WESTSIDE (2-35)	22	13
T0608100147	C-12	37.6289	-122.417	FE	=	49000	UG/L	2014-03-13	ENVIRONMENTAL MONITORING (WELLS)	EDF	SAN MATEO	2	WESTSIDE (2-35)	22	13
L10009353957	GW-61A-2	37.9467	-122.365	FE	=	351	UG/L	2014-05-08	ENVIRONMENTAL MONITORING (WELLS)	EDF	CONTRA COSTA	2	SANTA CLARA VALLEY - EAST BAY PLAIN (2-9.04)	15	9
L10009353957	GW-61A-2	37.9467	-122.365	FE	ND	198	UG/L	2015-07-16	ENVIRONMENTAL MONITORING (WELLS)	EDF	CONTRA COSTA	2	SANTA CLARA VALLEY - EAST BAY PLAIN (2-9.04)	15	9
T10000001468	MPMW6-4	37.6278	-122.416	FE	ND	0	UG/L	2014-01-13	ENVIRONMENTAL MONITORING (WELLS)	EDF	SAN MATEO	2	WESTSIDE (2-35)	22	13
T0600101410	IP-9	37.6792	-121.776	FE	=	310	UG/L	2015-01-21	ENVIRONMENTAL MONITORING (WELLS)	EDF	ALAMEDA	2	LIVERMORE VALLEY (2-10)	16	7
T0608500710	MW-4	37.3482	-121.893	FE	ND	0	UG/L	2015-06-18	ENVIRONMENTAL MONITORING (WELLS)	EDF	SANTA CLARA	2	SANTA CLARA VALLEY - SANTA CLARA (2-9.02)	27	15
T10000000901	MW4	37.3518	-121.974	FE	=	1450	UG/L	2014-03-03	ENVIRONMENTAL MONITORING (WELLS)	EDF	SANTA CLARA	2	SANTA CLARA VALLEY - SANTA CLARA (2-9.02)	25	10
T10000000901	MW4	37.3518	-121.974	FE	=	60.9	UG/L	2016-02-25	ENVIRONMENTAL MONITORING (WELLS)	EDF	SANTA CLARA	2	SANTA CLARA VALLEY - SANTA CLARA (2-9.02)	25	10
SL18244665	GW-6C-1	37.9445	-122.374	FE	=	248	UG/L	2015-10-05	ENVIRONMENTAL MONITORING (WELLS)	EDF	CONTRA COSTA	2	SANTA CLARA VALLEY - EAST BAY PLAIN (2-9.04)	15	9
W0604310020	4310020-005	37.263	-121.801	FE	<	100	UG/L	2014-01-21	WATER SUPPLY (WELLS)	DHS	SANTA CLARA	2	SANTA CLARA VALLEY - SANTA CLARA (2-9.02)	27	17
W0602800625	2800625-005	38.567	-122.474	FE	<	100	UG/L	2015-09-22	WATER SUPPLY (WELLS)	DHS	NAPA	2	NO BASIN FOUND	4	3
W0602810012	2810012-005	38.567	-122.435	FE	<	100	UG/L	2015-03-31	WATER SUPPLY (WELLS)	DHS	NAPA	2	NO BASIN FOUND	4	3
W0600103041	0103041-001	37.727	-122.157	FE	<	0	UG/L	2015-07-14	WATER SUPPLY (WELLS)	DHS	ALAMEDA	2	SANTA CLARA VALLEY - EAST BAY PLAIN (2-9.04)	18	9
W0604310011	4310011-118	37.321	-121.88	FE		140	UG/L	2016-03-02	WATER SUPPLY (WELLS)	DHS	SANTA CLARA	2	SANTA CLARA VALLEY - SANTA CLARA (2-9.02)	27	15
W0600110010	0110010-011	37.669	-121.88	FE	<	0	UG/L	2014-06-10	WATER SUPPLY (WELLS)	DHS	ALAMEDA	2	LIVERMORE VALLEY (2-10)	16	7
W0600110003	0110003-014	37.669	-121.801	FE	<	0	UG/L	2014-02-10	WATER SUPPLY (WELLS)	DHS	ALAMEDA	2	LIVERMORE VALLEY (2-10)	16	7
W0600110003	0110003-014	37.669	-121.801	FE	<	0	UG/L	2016-02-08	WATER SUPPLY (WELLS)	DHS	ALAMEDA	2	LIVERMORE VALLEY (2-10)	16	7
W0602110008	2110008-004	38.248	-122.95	FE		690	UG/L	2015-03-16	WATER SUPPLY (WELLS)	DHS	MARIN	2	SAND POINT AREA (2-27)	10	2
W0604110011	4110011-008	37.524	-122.514	FE		2800	UG/L	2014-03-19	WATER SUPPLY (WELLS)	DHS	SAN MATEO	2	HALF MOON BAY TERRACE (2-22)	22	13
W0604310011	4310011-090	37.35	-121.88	FE	<	0	UG/L	2016-01-06	WATER SUPPLY (WELLS)	DHS	SANTA CLARA	2	SANTA CLARA VALLEY - SANTA CLARA (2-9.02)	27	15
W0604310011	4310011-027	37.321	-121.92	FE		100	UG/L	2016-07-18	WATER SUPPLY (WELLS)	DHS	SANTA CLARA	2	SANTA CLARA VALLEY - SANTA CLARA (2-9.02)	28	15
W0602110007	2110007-001	38.248	-122.95	FE		3.926	UG/L	2015-06-16	WATER SUPPLY (WELLS)	DHS	MARIN	2	NO BASIN FOUND	10	2
W0602110007	2110007-001	38.248	-122.95	FE		14.65	UG/L	2015-07-16	WATER SUPPLY (WELLS)	DHS	MARIN	2	NO BASIN FOUND	10	2
W0602110007	2110007-001	38.248	-122.95	FE	<	0	UG/L	2016-06-16	WATER SUPPLY (WELLS)	DHS	MARIN	2	NO BASIN FOUND	10	2
W0602110007	2110007-001	38.248	-122.95	FE	<	0	UG/L	2016-07-19	WATER SUPPLY (WELLS)	DHS	MARIN	2	NO BASIN FOUND	10	2
W0604110028	4110028-003	37.495	-122.514	FE		2700	UG/L	2016-05-18	WATER SUPPLY (WELLS)	DHS	SAN MATEO	2	HALF MOON BAY TERRACE (2-22)	22	13
W0600110001	0110001-050	37.524	-121.999	FE	<	100	UG/L	2014-07-22	WATER SUPPLY (WELLS)	DHS	ALAMEDA	2	SANTA CLARA VALLEY - NILES CONE (2-9.01)	25	10
W0602801039	2801039-001	38.48	-122.395	FE		1200	UG/L	2014-01-20	WATER SUPPLY (WELLS)	DHS	NAPA	2	NAPA-SONOMA VALLEY - NAPA VALLEY (2-2.01)	4	3
W0604910006	4910006-057	38.248	-122.633	FE		270	UG/L	2015-01-29	WATER SUPPLY (WELLS)	DHS	SONOMA	2	PETALUMA VALLEY (2-1)	10	3
W0604901080	4901080-008	38.161	-122.474	FE		580	UG/L	2014-06-16	WATER SUPPLY (WELLS)	DHS	SONOMA	2	PETALUMA VALLEY (2-1)	10	3
SL0608125065	MW-78	37.4175	-122.206	FE	ND	0	UG/L	2015-08-18	ENVIRONMENTAL MONITORING (WELLS)	EDF	SAN MATEO	2	SANTA CLARA VALLEY - SAN MATEO PLAIN (2-9.03)	24	13
T0600101803	EW-4	37.7685	-122.239	FE	=	2100	UG/L	2015-06-18	ENVIRONMENTAL MONITORING (WELLS)	EDF	ALAMEDA	2	SANTA CLARA VALLEY - EAST BAY PLAIN (2-9.04)	18	9
T10000003609	CW-1A	37.9528	-122.061	FE	=	40	UG/L	2016-03-09	ENVIRONMENTAL MONITORING (WELLS)	EDF	CONTRA COSTA	2	YGNACIO VALLEY (2-6)	14	3
T0601300383	ESE-5	37.7766	-121.978	FE	=	34500	UG/L	2015-03-20	ENVIRONMENTAL MONITORING (WELLS)	EDF	CONTRA COSTA	2	SAN RAMON VALLEY (2-7)	16	7
L10006224883	L-7	37.8737	-122.322	FE	=	18000	UG/L	2016-07-19	ENVIRONMENTAL MONITORING (WELLS)	EDF	NO COUNTY FOUND	2	NO BASIN FOUND	15	9
SL0608125065	MW-64	37.4174	-122.206	FE	ND	0	UG/L	2014-08-20	ENVIRONMENTAL MONITORING (WELLS)	EDF	SAN MATEO	2	SANTA CLARA VALLEY - SAN MATEO PLAIN (2-9.03)	24	13
T10000003434	MW-1	37.7675	-122.169	FE	ND	130	UG/L	2016-08-05	ENVIRONMENTAL MONITORING (WELLS)	EDF	ALAMEDA	2	NO BASIN FOUND	18	9
L10006224883	GW-5	37.8723	-122.319	FE	=	4200	UG/L	2016-07-18	ENVIRONMENTAL MONITORING (WELLS)	EDF	NO COUNTY FOUND	2	SANTA CLARA VALLEY - EAST BAY PLAIN (2-9.04)	15	9
T0608100077	MW-9	37.6865	-122.47	FE	=	4100	UG/L	2014-11-07	ENVIRONMENTAL MONITORING (WELLS)	EDF	SAN MATEO	2	WESTSIDE (2-35)	19	11
T0600113164	DW-4	37.7071	-121.909	FE	=	2530	UG/L	2014-03-04	ENVIRONMENTAL MONITORING (WELLS)	EDF	ALAMEDA	2	LIVERMORE VALLEY (2-10)	16	7
T0608100147	E-1	37.6288	-122.417	FE	=	4200	UG/L	2014-01-09	ENVIRONMENTAL MONITORING (WELLS)	EDF	SAN MATEO	2	WESTSIDE (2-35)	22	13
W0600110010	0110010-012	37.698	-121.88	FE		0	UG/L	2016-02-03	WATER SUPPLY (WELLS)	DHS	ALAMEDA	2	LIVERMORE VALLEY (2-10)	16	7
T10000003609	CW-2B	37.9529	-122.061	FE	=	110	UG/L	2016-08-29	ENVIRONMENTAL MONITORING (WELLS)	EDF	CONTRA COSTA	2	YGNACIO VALLEY (2-6)	14	3
T10000003609	CW-10A	37.9536	-122.061	FE	=	1400	UG/L	2015-12-16	ENVIRONMENTAL MONITORING (WELLS)	EDF	CONTRA COSTA	2	YGNACIO VALLEY (2-6)	14	3
T10000003609	CW-10A	37.9536	-122.061	FE	=	680	UG/L	2016-05-25	ENVIRONMENTAL MONITORING (WELLS)	EDF	CONTRA COSTA	2	YGNACIO VALLEY (2-6)	14	3
T10000003609	CW-3B	37.9532	-122.06	FE	=	8800	UG/L	2015-12-16	ENVIRONMENTAL MONITORING (WELLS)	EDF	CONTRA COSTA	2	YGNACIO VALLEY (2-6)	14	3
T0608500710	MW-32	37.3484	-121.892	FE	ND	0	UG/L	2015-06-22	ENVIRONMENTAL MONITORING (WELLS)	EDF	SANTA CLARA	2	SANTA CLARA VALLEY - SANTA CLARA (2-9.02)	27	15
T0600101516	C2	37.6934	-122.068	FE	=	2700	UG/L	2015-01-28	ENVIRONMENTAL MONITORING (WELLS)	EDF	ALAMEDA	2	CASTRO VALLEY (2-8)	20	10
T0600101516	C2	37.6934	-122.068	FE	=	3700	UG/L	2015-12-15	ENVIRONMENTAL MONITORING (WELLS)	EDF	ALAMEDA	2	CASTRO VALLEY (2-8)	20	10
T0608500710	MW-29	37.3486	-121.893	FE	=	170	UG/L	2014-04-30	ENVIRONMENTAL MONITORING (WELLS)	EDF	SANTA CLARA	2	SANTA CLARA VALLEY - SANTA CLARA (2-9.02)	27	15
T0608500710	MW-29	37.3486	-121.893	FE	=	120	UG/L	2014-10-03	ENVIRONMENTAL MONITORING (WELLS)	EDF	SANTA CLARA	2	SANTA CLARA VALLEY - SANTA CLARA (2-9.02)	27	15
T0609700943	RW-1	38.2492	-122.626	FE	=	8800	UG/L	2014-11-07	ENVIRONMENTAL MONITORING (WELLS)	EDF	SONOMA	2	PETALUMA VALLEY (2-1)	10	3
SL20210828	115C	38.0221	-121.848	FE	=	132	UG/L	2015-04-14	ENVIRONMENTAL MONITORING (WELLS)	EDF	CONTRA COSTA	2	PITTSBURG PLAIN (2-4)	11	7
T0600100939	IW-2	37.7328	-122.201	FE	=	14000	UG/L	2014-02-05	ENVIRONMENTAL MONITORING (WELLS)	EDF	ALAMEDA	2	SANTA CLARA VALLEY - EAST BAY PLAIN (2-9.04)	18	9
T10000001468	MPMW2-5	37.6275	-122.416	FE	=	42000	UG/L	2015-07-21	ENVIRONMENTAL MONITORING (WELLS)	EDF	SAN MATEO	2	WESTSIDE (2-35)	22	13
L10009353957	GW-38A	37.9539	-122.376	FE	=	1820	UG/L	2015-07-15	ENVIRONMENTAL MONITORING (WELLS)	EDF	CONTRA COSTA	2	SANTA CLARA VALLEY - EAST BAY PLAIN (2-9.04)	15	9
W0604901144	4901144-002	38.335	-122.514	FE		130	UG/L	2015-01-02	WATER SUPPLY (WELLS)	DHS	SONOMA	2	NO BASIN FOUND	4	2
W0604310011	4310011-123	37.292	-121.959	FE		280	UG/L	2014-01-14	WATER SUPPLY (WELLS)	DHS	SANTA CLARA	2	SANTA CLARA VALLEY - SANTA CLARA (2-9.02)	28	15
W0604310011	4310011-123	37.292	-121.959	FE		350	UG/L	2014-07-16	WATER SUPPLY (WELLS)	DHS	SANTA CLARA	2	SANTA CLARA VALLEY - SANTA CLARA (2-9.02)	28	15
W0604100533	4100533-003	37.379	-122.276	FE		4500	UG/L	2016-02-12	WATER SUPPLY (WELLS)	DHS	SAN MATEO	2	NO BASIN FOUND	24	13
T0609592162	MW-M9	38.0589	-122.527	FE	<	170	UG/L	2014-11-13	ENVIRONMENTAL MONITORING (WELLS)	EDF	MARIN	2	NOVATO VALLEY (2-30)	10	2
T0600101410	DW-5	37.6794	-121.777	FE	ND	0	UG/L	2014-01-22	ENVIRONMENTAL MONITORING (WELLS)	EDF	ALAMEDA	2	LIVERMORE VALLEY (2-10)	16	7
T0608100147	C-11	37.6289	-122.417	FE	=	15000	UG/L	2014-02-13	ENVIRONMENTAL MONITORING (WELLS)	EDF	SAN MATEO	2	WESTSIDE (2-35)	22	13
T0608100147	C-11	37.6289	-122.417	FE	=	2600	UG/L	2014-07-16	ENVIRONMENTAL MONITORING (WELLS)	EDF	SAN MATEO	2	WESTSIDE (2-35)	22	13
T0608100147	C-11	37.6289	-122.417	FE	=	4300	UG/L	2015-04-21	ENVIRONMENTAL MONITORING (WELLS)	EDF	SAN MATEO	2	WESTSIDE (2-35)	22	13
T0609592161	MW-M21	38.0598	-122.527	FE	<	190	UG/L	2014-11-12	ENVIRONMENTAL MONITORING (WELLS)	EDF	MARIN	2	NOVATO VALLEY (2-30)	10	2
T0609592162	MW-1A	38.0559	-122.528	FE	=	18000	UG/L	2014-11-14	ENVIRONMENTAL MONITORING (WELLS)	EDF	MARIN	2	NOVATO VALLEY (2-30)	10	2
T0600101486	MW-1	37.7989	-122.27	FE	=	56	UG/L	2014-02-06	ENVIRONMENTAL MONITORING (WELLS)	EDF	ALAMEDA	2	SANTA CLARA VALLEY - EAST BAY PLAIN (2-9.04)	18	9
T0600100980	MW-6R	37.7662	-122.243	FE	ND	0	UG/L	2015-11-10	ENVIRONMENTAL MONITORING (WELLS)	EDF	ALAMEDA	2	SANTA CLARA VALLEY - EAST BAY PLAIN (2-9.04)	18	9
T0601300383	MW-11	37.7768	-121.977	FE	=	1810	UG/L	2015-04-09	ENVIRONMENTAL MONITORING (WELLS)	EDF	CONTRA COSTA	2	SAN RAMON VALLEY (2-7)	16	7
T0601300383	MW-11	37.7768	-121.977	FE	=	2620	UG/L	2015-07-20	ENVIRONMENTAL MONITORING (WELLS)	EDF	CONTRA COSTA	2	SAN RAMON VALLEY (2-7)	16	7
T10000002937	MW-2	37.2216	-121.979	FE	=	55900	UG/L	2015-08-03	ENVIRONMENTAL MONITORING (WELLS)	EDF	SANTA CLARA	2	SANTA CLARA VALLEY - SANTA CLARA (2-9.02)	28	15
T0609592162	IT-GMP-17	38.0631	-122.526	FE	ND	0	UG/L	2014-11-13	ENVIRONMENTAL MONITORING (WELLS)	EDF	MARIN	2	NO BASIN FOUND	10	2
T0608500710	EW-1	37.3482	-121.892	FE	=	350	UG/L	2015-12-03	ENVIRONMENTAL MONITORING (WELLS)	EDF	SANTA CLARA	2	SANTA CLARA VALLEY - SANTA CLARA (2-9.02)	27	15
T0608500710	EW-1	37.3482	-121.892	FE	=	780	UG/L	2015-06-23	ENVIRONMENTAL MONITORING (WELLS)	EDF	SANTA CLARA	2	SANTA CLARA VALLEY - SANTA CLARA (2-9.02)	27	15
T10000003609	CW-4B	37.9532	-122.061	FE	=	60	UG/L	2016-05-25	ENVIRONMENTAL MONITORING (WELLS)	EDF	CONTRA COSTA	2	YGNACIO VALLEY (2-6)	14	3
T0600100421	MW-12	37.6064	-122.065	FE	=	870	UG/L	2016-04-14	ENVIRONMENTAL MONITORING (WELLS)	EDF	ALAMEDA	2	SANTA CLARA VALLEY - EAST BAY PLAIN (2-9.04)	20	10
T0608590392	MW-8	37.2912	-121.912	FE	=	610	UG/L	2014-03-20	ENVIRONMENTAL MONITORING (WELLS)	EDF	SANTA CLARA	2	SANTA CLARA VALLEY - SANTA CLARA (2-9.02)	28	15
T0600101486	MW-2	37.799	-122.27	FE	ND	0	UG/L	2014-02-06	ENVIRONMENTAL MONITORING (WELLS)	EDF	ALAMEDA	2	SANTA CLARA VALLEY - EAST BAY PLAIN (2-9.04)	18	9
T10000001468	MPMW4-3	37.6275	-122.416	FE	=	46000	UG/L	2014-04-17	ENVIRONMENTAL MONITORING (WELLS)	EDF	SAN MATEO	2	WESTSIDE (2-35)	22	13
T0601300383	MW-8	37.7768	-121.978	FE	=	23700	UG/L	2015-05-28	ENVIRONMENTAL MONITORING (WELLS)	EDF	CONTRA COSTA	2	SAN RAMON VALLEY (2-7)	16	7
T0601300383	MW-8	37.7768	-121.978	FE	=	5350	UG/L	2015-07-20	ENVIRONMENTAL MONITORING (WELLS)	EDF	CONTRA COSTA	2	SAN RAMON VALLEY (2-7)	16	7
L10006514573	G-17	37.4132	-121.971	FE	ND	0	UG/L	2014-03-03	ENVIRONMENTAL MONITORING (WELLS)	EDF	SANTA CLARA	2	SANTA CLARA VALLEY - SANTA CLARA (2-9.02)	25	10
T0601300383	MW-7	37.7767	-121.978	FE	=	41600	UG/L	2015-02-16	ENVIRONMENTAL MONITORING (WELLS)	EDF	CONTRA COSTA	2	SAN RAMON VALLEY (2-7)	16	7
SL1823a658	P-11	38.0172	-121.853	FE	=	384	UG/L	2015-01-05	ENVIRONMENTAL MONITORING (WELLS)	EDF	CONTRA COSTA	2	PITTSBURG PLAIN (2-4)	11	7
W0602110501	2110501-004	38.046	-122.87	FE	<	100	UG/L	2014-01-07	WATER SUPPLY (WELLS)	DHS	MARIN	2	NO BASIN FOUND	10	2
W0602110501	2110501-004	38.046	-122.87	FE	<	100	UG/L	2014-02-18	WATER SUPPLY (WELLS)	DHS	MARIN	2	NO BASIN FOUND	10	2
W0602110501	2110501-004	38.046	-122.87	FE		120	UG/L	2014-07-01	WATER SUPPLY (WELLS)	DHS	MARIN	2	NO BASIN FOUND	10	2
W0602110501	2110501-004	38.046	-122.87	FE		210	UG/L	2015-12-01	WATER SUPPLY (WELLS)	DHS	MARIN	2	NO BASIN FOUND	10	2
W0604110011	4110011-012	37.495	-122.395	FE		160	UG/L	2014-02-18	WATER SUPPLY (WELLS)	DHS	SAN MATEO	2	NO BASIN FOUND	24	13
W0604900562	4900562-002	38.306	-122.553	FE		210	UG/L	2015-10-19	WATER SUPPLY (WELLS)	DHS	SONOMA	2	NO BASIN FOUND	4	3
W0604110009	4110009-008	37.669	-122.435	FE		6.856	UG/L	2015-06-01	WATER SUPPLY (WELLS)	DHS	SAN MATEO	2	WESTSIDE (2-35)	19	13
W0604310007	4310007-011	37.379	-122.078	FE	<	100	UG/L	2014-04-23	WATER SUPPLY (WELLS)	DHS	SANTA CLARA	2	SANTA CLARA VALLEY - SANTA CLARA (2-9.02)	24	13
W0604110009	4110009-003	37.669	-122.435	FE	<	0	UG/L	2016-05-05	WATER SUPPLY (WELLS)	DHS	SAN MATEO	2	WESTSIDE (2-35)	22	13
W0604300525	4300525-003	37.147	-121.959	FE		3200	UG/L	2015-05-13	WATER SUPPLY (WELLS)	DHS	SANTA CLARA	2	NO BASIN FOUND	28	15
W0604310011	4310011-022	37.321	-121.92	FE	<	100	UG/L	2014-09-10	WATER SUPPLY (WELLS)	DHS	SANTA CLARA	2	SANTA CLARA VALLEY - SANTA CLARA (2-9.02)	28	15
W0604310011	4310011-024	37.321	-121.92	FE	<	100	UG/L	2014-06-17	WATER SUPPLY (WELLS)	DHS	SANTA CLARA	2	SANTA CLARA VALLEY - SANTA CLARA (2-9.02)	28	15
W0604310011	4310011-024	37.321	-121.92	FE	<	100	UG/L	2014-09-10	WATER SUPPLY (WELLS)	DHS	SANTA CLARA	2	SANTA CLARA VALLEY - SANTA CLARA (2-9.02)	28	15
W0604310011	4310011-093	37.35	-121.88	FE		100	UG/L	2014-09-11	WATER SUPPLY (WELLS)	DHS	SANTA CLARA	2	SANTA CLARA VALLEY - SANTA CLARA (2-9.02)	27	15
W0604310011	4310011-089	37.35	-121.88	FE	<	100	UG/L	2014-01-16	WATER SUPPLY (WELLS)	DHS	SANTA CLARA	2	SANTA CLARA VALLEY - SANTA CLARA (2-9.02)	27	15
W0604310011	4310011-089	37.35	-121.88	FE		1100	UG/L	2014-06-16	WATER SUPPLY (WELLS)	DHS	SANTA CLARA	2	SANTA CLARA VALLEY - SANTA CLARA (2-9.02)	27	15
W0600110010	0110010-007	37.698	-121.88	FE	<	0	UG/L	2014-09-09	WATER SUPPLY (WELLS)	DHS	ALAMEDA	2	LIVERMORE VALLEY (2-10)	16	7
W0604910006	4910006-009	38.248	-122.633	FE		230	UG/L	2014-04-22	WATER SUPPLY (WELLS)	DHS	SONOMA	2	PETALUMA VALLEY (2-1)	10	3
W0600110010	0110010-005	37.669	-121.92	FE	<	0	UG/L	2014-08-11	WATER SUPPLY (WELLS)	DHS	ALAMEDA	2	LIVERMORE VALLEY (2-10)	16	7
W0604910006	4910006-012	38.277	-122.672	FE		150	UG/L	2014-09-16	WATER SUPPLY (WELLS)	DHS	SONOMA	2	PETALUMA VALLEY (2-1)	10	3
W0600110010	0110010-005	37.669	-121.92	FE		0	UG/L	2016-06-02	WATER SUPPLY (WELLS)	DHS	ALAMEDA	2	LIVERMORE VALLEY (2-10)	16	7
W0602800625	2800625-007	38.538	-122.474	FE		1800	UG/L	2014-03-19	WATER SUPPLY (WELLS)	DHS	NAPA	2	NO BASIN FOUND	4	3
W0602800035	2800035-001	38.509	-122.435	FE		1500	UG/L	2016-02-01	WATER SUPPLY (WELLS)	DHS	NAPA	2	NO BASIN FOUND	4	3
W0602800035	2800035-001	38.509	-122.435	FE		1400	UG/L	2016-05-23	WATER SUPPLY (WELLS)	DHS	NAPA	2	NO BASIN FOUND	4	3
W0602810012	2810012-003	38.567	-122.435	FE	<	100	UG/L	2015-03-31	WATER SUPPLY (WELLS)	DHS	NAPA	2	NO BASIN FOUND	4	3
W0602810004	2810004-006	38.509	-122.435	FE	<	100	UG/L	2015-05-06	WATER SUPPLY (WELLS)	DHS	NAPA	2	NO BASIN FOUND	4	3
W0602810007	2810007-002	38.393	-122.355	FE		580	UG/L	2014-12-30	WATER SUPPLY (WELLS)	DHS	NAPA	2	NAPA-SONOMA VALLEY - NAPA VALLEY (2-2.01)	4	3
W0600110001	0110001-009	37.553	-121.999	FE	<	100	UG/L	2016-07-25	WATER SUPPLY (WELLS)	DHS	ALAMEDA	2	SANTA CLARA VALLEY - NILES CONE (2-9.01)	20	10
W0604910012	4910012-003	38.306	-122.474	FE	<	0	UG/L	2014-03-17	WATER SUPPLY (WELLS)	DHS	SONOMA	2	NO BASIN FOUND	10	3
W0600110001	0110001-021	37.553	-121.959	FE	<	100	UG/L	2014-07-22	WATER SUPPLY (WELLS)	DHS	ALAMEDA	2	SANTA CLARA VALLEY - NILES CONE (2-9.01)	20	10
W0600110001	0110001-011	37.553	-121.999	FE	<	100	UG/L	2015-07-14	WATER SUPPLY (WELLS)	DHS	ALAMEDA	2	SANTA CLARA VALLEY - NILES CONE (2-9.01)	20	10
W0600110001	0110001-019	37.553	-121.959	FE	<	100	UG/L	2015-07-21	WATER SUPPLY (WELLS)	DHS	ALAMEDA	2	SANTA CLARA VALLEY - NILES CONE (2-9.01)	20	10
W0604900973	4900973-003	38.306	-122.553	FE	<	100	UG/L	2015-02-22	WATER SUPPLY (WELLS)	DHS	SONOMA	2	NO BASIN FOUND	10	3
W0604901062	4901062-002	38.422	-122.553	FE	<	100	UG/L	2015-02-27	WATER SUPPLY (WELLS)	DHS	SONOMA	2	NO BASIN FOUND	4	2
W0604900533	4900533-001	38.393	-122.553	FE		440	UG/L	2016-03-29	WATER SUPPLY (WELLS)	DHS	SONOMA	2	NAPA-SONOMA VALLEY - SONOMA VALLEY (2-2.02)	4	2
W0604310001	4310001-032	37.408	-122.118	FE	<	0	UG/L	2015-12-09	WATER SUPPLY (WELLS)	DHS	SANTA CLARA	2	SANTA CLARA VALLEY - SANTA CLARA (2-9.02)	24	13
W0604310014	4310014-010	37.35	-122.038	FE	<	0	UG/L	2015-02-11	WATER SUPPLY (WELLS)	DHS	SANTA CLARA	2	SANTA CLARA VALLEY - SANTA CLARA (2-9.02)	24	13
W0604110020	4110020-005	37.466	-122.157	FE	<	0	UG/L	2014-05-19	WATER SUPPLY (WELLS)	DHS	SAN MATEO	2	SANTA CLARA VALLEY - SAN MATEO PLAIN (2-9.03)	24	13
W0604900843	4900843-004	38.306	-122.435	FE	<	100	UG/L	2013-12-16	WATER SUPPLY (WELLS)	DHS	SONOMA	2	NO BASIN FOUND	4	3
W0604900843	4900843-004	38.306	-122.435	FE		1400	UG/L	2015-12-02	WATER SUPPLY (WELLS)	DHS	SONOMA	2	NO BASIN FOUND	4	3
W0604900843	4900843-004	38.306	-122.435	FE		390	UG/L	2016-03-14	WATER SUPPLY (WELLS)	DHS	SONOMA	2	NO BASIN FOUND	4	3
W0604900843	4900843-004	38.306	-122.435	FE	<	100	UG/L	2016-06-06	WATER SUPPLY (WELLS)	DHS	SONOMA	2	NO BASIN FOUND	4	3
W0604310001	4310001-020	37.35	-122.038	FE	<	0	UG/L	2015-04-09	WATER SUPPLY (WELLS)	DHS	SANTA CLARA	2	SANTA CLARA VALLEY - SANTA CLARA (2-9.02)	24	13
W0604310001	4310001-030	37.379	-122.118	FE	<	0	UG/L	2016-03-23	WATER SUPPLY (WELLS)	DHS	SANTA CLARA	2	SANTA CLARA VALLEY - SANTA CLARA (2-9.02)	24	13
W0600110003	0110003-011	37.669	-121.761	FE	<	0	UG/L	2015-07-21	WATER SUPPLY (WELLS)	DHS	ALAMEDA	2	LIVERMORE VALLEY (2-10)	16	7
W0604310001	4310001-016	37.35	-122.038	FE	<	0	UG/L	2014-09-10	WATER SUPPLY (WELLS)	DHS	SANTA CLARA	2	SANTA CLARA VALLEY - SANTA CLARA (2-9.02)	24	13
W0604310001	4310001-028	37.379	-122.118	FE	<	0	UG/L	2016-03-23	WATER SUPPLY (WELLS)	DHS	SANTA CLARA	2	SANTA CLARA VALLEY - SANTA CLARA (2-9.02)	24	13
W0600707623	0707623-001	37.843	-122.157	FE	<	0	UG/L	2014-09-18	WATER SUPPLY (WELLS)	DHS	CONTRA COSTA	2	NO BASIN FOUND	16	7
W0602800532	2800532-001	38.538	-122.474	FE	<	100	UG/L	2015-08-05	WATER SUPPLY (WELLS)	DHS	NAPA	2	NO BASIN FOUND	4	3
W0602100519	2100519-002	38.248	-122.95	FE	<	100	UG/L	2016-07-18	WATER SUPPLY (WELLS)	DHS	MARIN	2	WILSON GROVE FORMATION HIGHLANDS (1-59)	10	2
W0604910025	4910025-001	38.422	-122.553	FE	<	100	UG/L	2015-06-15	WATER SUPPLY (WELLS)	DHS	SONOMA	2	KENWOOD VALLEY (2-19)	4	2
W0602810001	2810001-003	38.596	-122.474	FE	<	0	UG/L	2015-10-21	WATER SUPPLY (WELLS)	DHS	NAPA	2	NO BASIN FOUND	4	3
W0604310019	4310019-005	37.408	-121.92	FE		120	UG/L	2016-02-09	WATER SUPPLY (WELLS)	DHS	SANTA CLARA	2	SANTA CLARA VALLEY - SANTA CLARA (2-9.02)	25	10
W0600110010	0110010-017	37.698	-121.84	FE		0	UG/L	2016-05-19	WATER SUPPLY (WELLS)	DHS	ALAMEDA	2	LIVERMORE VALLEY (2-10)	16	7
W0604900563	4900563-003	38.306	-122.474	FE		80	UG/L	2016-05-16	WATER SUPPLY (WELLS)	DHS	SONOMA	2	NO BASIN FOUND	4	2
W0604110028	4110028-002	37.524	-122.514	FE		3800	UG/L	2014-04-21	WATER SUPPLY (WELLS)	DHS	SAN MATEO	2	HALF MOON BAY TERRACE (2-22)	22	13
W0604110009	4110009-006	37.669	-122.435	FE		0.328	UG/L	2014-09-08	WATER SUPPLY (WELLS)	DHS	SAN MATEO	2	WESTSIDE (2-35)	22	13
W0604300770	4300770-002	37.35	-121.761	FE	<	0	UG/L	2015-08-27	WATER SUPPLY (WELLS)	DHS	SANTA CLARA	2	NO BASIN FOUND	25	15
W0604110009	4110009-007	37.669	-122.435	FE	<	0	UG/L	2014-10-16	WATER SUPPLY (WELLS)	DHS	SAN MATEO	2	WESTSIDE (2-35)	22	13
T0609592161	IT-GMP-15	38.062	-122.526	FE	=	1300	UG/L	2014-11-13	ENVIRONMENTAL MONITORING (WELLS)	EDF	MARIN	2	NOVATO VALLEY (2-30)	10	2
T0608186803	MW-7	37.5766	-122.346	FE	=	2270	UG/L	2015-03-25	ENVIRONMENTAL MONITORING (WELLS)	EDF	SAN MATEO	2	WESTSIDE (2-35)	22	13
T10000000666	MW-04	37.8923	-122.112	FE	=	2090	UG/L	2014-06-24	ENVIRONMENTAL MONITORING (WELLS)	EDF	CONTRA COSTA	2	NO BASIN FOUND	16	7
T0601300383	SW-1	37.7766	-121.978	FE	=	95400	UG/L	2015-03-20	ENVIRONMENTAL MONITORING (WELLS)	EDF	CONTRA COSTA	2	SAN RAMON VALLEY (2-7)	16	7
T0609592162	957-MW4	38.0576	-122.527	FE	ND	0	UG/L	2014-11-13	ENVIRONMENTAL MONITORING (WELLS)	EDF	MARIN	2	NOVATO VALLEY (2-30)	10	2
T0609592162	MW-M14S	38.0629	-122.527	FE	=	1400	UG/L	2014-11-12	ENVIRONMENTAL MONITORING (WELLS)	EDF	MARIN	2	NOVATO VALLEY (2-30)	10	2
T0608100147	C-8	37.6291	-122.417	FE	=	8400	UG/L	2015-04-21	ENVIRONMENTAL MONITORING (WELLS)	EDF	SAN MATEO	2	WESTSIDE (2-35)	22	13
T10000000901	MW2	37.3506	-121.974	FE	=	409	UG/L	2014-05-28	ENVIRONMENTAL MONITORING (WELLS)	EDF	SANTA CLARA	2	SANTA CLARA VALLEY - SANTA CLARA (2-9.02)	25	10
T10000000901	MW2	37.3506	-121.974	FE	=	10.7	UG/L	2015-02-24	ENVIRONMENTAL MONITORING (WELLS)	EDF	SANTA CLARA	2	SANTA CLARA VALLEY - SANTA CLARA (2-9.02)	25	10
L10009353957	CW-7	37.9497	-122.38	FE	=	21600	UG/L	2014-05-28	ENVIRONMENTAL MONITORING (WELLS)	EDF	CONTRA COSTA	2	NO BASIN FOUND	15	9
T0600101410	DW-9	37.6799	-121.777	FE	=	840	UG/L	2014-01-22	ENVIRONMENTAL MONITORING (WELLS)	EDF	ALAMEDA	2	LIVERMORE VALLEY (2-10)	16	7
T0600100980	EW-19	37.7661	-122.243	FE	=	43000	UG/L	2014-06-25	ENVIRONMENTAL MONITORING (WELLS)	EDF	ALAMEDA	2	SANTA CLARA VALLEY - EAST BAY PLAIN (2-9.04)	18	9
T10000000666	MW-09	37.892	-122.112	FE	ND	0	UG/L	2015-11-03	ENVIRONMENTAL MONITORING (WELLS)	EDF	CONTRA COSTA	2	NO BASIN FOUND	16	7
T10000003609	CW-7B	37.9537	-122.06	FE	=	2100	UG/L	2016-03-09	ENVIRONMENTAL MONITORING (WELLS)	EDF	CONTRA COSTA	2	YGNACIO VALLEY (2-6)	14	3
T10000003609	CW-7B	37.9537	-122.06	FE	=	3100	UG/L	2016-05-25	ENVIRONMENTAL MONITORING (WELLS)	EDF	CONTRA COSTA	2	YGNACIO VALLEY (2-6)	14	3
T0608590392	MW-9	37.2912	-121.912	FE	=	48000	UG/L	2014-03-19	ENVIRONMENTAL MONITORING (WELLS)	EDF	SANTA CLARA	2	SANTA CLARA VALLEY - SANTA CLARA (2-9.02)	28	15
T0608500255	C-7	37.3205	-121.972	FE	=	81.8	UG/L	2014-01-31	ENVIRONMENTAL MONITORING (WELLS)	EDF	SANTA CLARA	2	SANTA CLARA VALLEY - SANTA CLARA (2-9.02)	28	15
L10009353957	GW-31A	37.9539	-122.374	FE	ND	175	UG/L	2015-04-28	ENVIRONMENTAL MONITORING (WELLS)	EDF	CONTRA COSTA	2	SANTA CLARA VALLEY - EAST BAY PLAIN (2-9.04)	15	9
T0600101803	EW-2	37.7683	-122.24	FE	=	1300	UG/L	2015-06-18	ENVIRONMENTAL MONITORING (WELLS)	EDF	ALAMEDA	2	SANTA CLARA VALLEY - EAST BAY PLAIN (2-9.04)	18	9
T0600100980	MW-9	37.7663	-122.243	FE	=	44000	UG/L	2014-06-26	ENVIRONMENTAL MONITORING (WELLS)	EDF	ALAMEDA	2	SANTA CLARA VALLEY - EAST BAY PLAIN (2-9.04)	18	9
T0601300383	OW-1	37.7767	-121.978	FE	=	69500	UG/L	2015-04-08	ENVIRONMENTAL MONITORING (WELLS)	EDF	CONTRA COSTA	2	SAN RAMON VALLEY (2-7)	16	7
SL1823a658	P-19	38.0174	-121.854	FE	=	488000	UG/L	2015-01-05	ENVIRONMENTAL MONITORING (WELLS)	EDF	CONTRA COSTA	2	PITTSBURG PLAIN (2-4)	11	7
T0601300383	MW-9	37.7769	-121.978	FE	=	340000	UG/L	2014-08-21	ENVIRONMENTAL MONITORING (WELLS)	EDF	CONTRA COSTA	2	SAN RAMON VALLEY (2-7)	16	7
T10000001468	MPMW5-2	37.6279	-122.416	FE	=	190000	UG/L	2014-04-17	ENVIRONMENTAL MONITORING (WELLS)	EDF	SAN MATEO	2	WESTSIDE (2-35)	22	13
T10000001468	MPMW5-2	37.6279	-122.416	FE	=	180000	UG/L	2014-07-09	ENVIRONMENTAL MONITORING (WELLS)	EDF	SAN MATEO	2	WESTSIDE (2-35)	22	13
T10000001468	MPMW5-2	37.6279	-122.416	FE	=	56000	UG/L	2014-10-15	ENVIRONMENTAL MONITORING (WELLS)	EDF	SAN MATEO	2	WESTSIDE (2-35)	22	13
L10005834311	MW-2A	37.7502	-121.659	FE	=	25	UG/L	2015-11-11	ENVIRONMENTAL MONITORING (WELLS)	EDF	ALAMEDA	2	NO BASIN FOUND	16	7
T0600101516	OW5	37.6933	-122.068	FE	=	550	UG/L	2015-12-14	ENVIRONMENTAL MONITORING (WELLS)	EDF	ALAMEDA	2	CASTRO VALLEY (2-8)	20	10
T0600101516	OW5	37.6933	-122.068	FE	=	2800	UG/L	2015-12-14	ENVIRONMENTAL MONITORING (WELLS)	EDF	ALAMEDA	2	CASTRO VALLEY (2-8)	20	10
T0608164698	S-2	37.5886	-122.363	FE	=	15000	UG/L	2014-03-12	ENVIRONMENTAL MONITORING (WELLS)	EDF	SAN MATEO	2	WESTSIDE (2-35)	22	13
SL18244665	GW-7A	37.9441	-122.367	FE	ND	36	UG/L	2015-08-27	ENVIRONMENTAL MONITORING (WELLS)	EDF	CONTRA COSTA	2	SANTA CLARA VALLEY - EAST BAY PLAIN (2-9.04)	15	9
SL18244665	GW-10B	37.9424	-122.375	FE	ND	0	UG/L	2015-10-01	ENVIRONMENTAL MONITORING (WELLS)	EDF	CONTRA COSTA	2	SANTA CLARA VALLEY - EAST BAY PLAIN (2-9.04)	15	9
T0600100980	EW-18	37.7661	-122.243	FE	=	73000	UG/L	2014-06-25	ENVIRONMENTAL MONITORING (WELLS)	EDF	ALAMEDA	2	SANTA CLARA VALLEY - EAST BAY PLAIN (2-9.04)	18	9
T0608100661	P-2	37.4947	-122.215	FE	=	7000	UG/L	2014-04-03	ENVIRONMENTAL MONITORING (WELLS)	EDF	SAN MATEO	2	SANTA CLARA VALLEY - SAN MATEO PLAIN (2-9.03)	22	13
T0608100661	P-2	37.4947	-122.215	FE	=	2000	UG/L	2015-04-01	ENVIRONMENTAL MONITORING (WELLS)	EDF	SAN MATEO	2	SANTA CLARA VALLEY - SAN MATEO PLAIN (2-9.03)	22	13
SL0600100443	MW-3	37.5505	-121.858	FE	ND	0	UG/L	2014-03-20	ENVIRONMENTAL MONITORING (WELLS)	EDF	ALAMEDA	2	SUNOL VALLEY (2-11)	20	7
T0608100147	C-2	37.629	-122.417	FE	=	17000	UG/L	2014-03-13	ENVIRONMENTAL MONITORING (WELLS)	EDF	SAN MATEO	2	WESTSIDE (2-35)	22	13
T0608100147	C-2	37.629	-122.417	FE	=	1800	UG/L	2015-04-21	ENVIRONMENTAL MONITORING (WELLS)	EDF	SAN MATEO	2	WESTSIDE (2-35)	22	13
T0600101516	EW1	37.6933	-122.068	FE	=	110	UG/L	2015-12-15	ENVIRONMENTAL MONITORING (WELLS)	EDF	ALAMEDA	2	CASTRO VALLEY (2-8)	20	10
T0608164698	MW-2	37.589	-122.363	FE	ND	0	UG/L	2013-12-05	ENVIRONMENTAL MONITORING (WELLS)	EDF	SAN MATEO	2	WESTSIDE (2-35)	22	13
T0600100980	MW-12	37.7663	-122.243	FE	=	850	UG/L	2015-08-10	ENVIRONMENTAL MONITORING (WELLS)	EDF	ALAMEDA	2	SANTA CLARA VALLEY - EAST BAY PLAIN (2-9.04)	18	9
T0601300383	ESE-2	37.7764	-121.978	FE	=	18000	UG/L	2015-07-20	ENVIRONMENTAL MONITORING (WELLS)	EDF	CONTRA COSTA	2	SAN RAMON VALLEY (2-7)	16	7
L10009353957	GW-78A	37.9476	-122.38	FE	=	239	UG/L	2014-07-24	ENVIRONMENTAL MONITORING (WELLS)	EDF	CONTRA COSTA	2	NO BASIN FOUND	15	9
SL18244665	B-4	37.9447	-122.372	FE	=	3060	UG/L	2015-09-10	ENVIRONMENTAL MONITORING (WELLS)	EDF	CONTRA COSTA	2	SANTA CLARA VALLEY - EAST BAY PLAIN (2-9.04)	15	9
T10000001468	MPMW7-5	37.6275	-122.416	FE	=	8900	UG/L	2014-07-09	ENVIRONMENTAL MONITORING (WELLS)	EDF	SAN MATEO	2	WESTSIDE (2-35)	22	13
L10006514573	G-3R	37.4137	-121.965	FE	ND	0	UG/L	2016-08-24	ENVIRONMENTAL MONITORING (WELLS)	EDF	SANTA CLARA	2	SANTA CLARA VALLEY - SANTA CLARA (2-9.02)	25	10
W0600110001	0110001-025	37.553	-121.959	FE	<	100	UG/L	2016-07-18	WATER SUPPLY (WELLS)	DHS	ALAMEDA	2	SANTA CLARA VALLEY - NILES CONE (2-9.01)	20	10
T0600101486	MW-5	37.7989	-122.27	FE	=	410	UG/L	2014-02-06	ENVIRONMENTAL MONITORING (WELLS)	EDF	ALAMEDA	2	SANTA CLARA VALLEY - EAST BAY PLAIN (2-9.04)	18	9
L10009353957	CW-6	37.9514	-122.38	FE	ND	0	UG/L	2014-08-27	ENVIRONMENTAL MONITORING (WELLS)	EDF	CONTRA COSTA	2	NO BASIN FOUND	15	9
L10009353957	CW-6	37.9514	-122.38	FE	=	3410	UG/L	2015-02-11	ENVIRONMENTAL MONITORING (WELLS)	EDF	CONTRA COSTA	2	NO BASIN FOUND	15	9
L10009353957	CW-6	37.9514	-122.38	FE	=	2920	UG/L	2015-05-20	ENVIRONMENTAL MONITORING (WELLS)	EDF	CONTRA COSTA	2	NO BASIN FOUND	15	9
L10009353957	CW-6	37.9514	-122.38	FE	ND	0	UG/L	2015-07-22	ENVIRONMENTAL MONITORING (WELLS)	EDF	CONTRA COSTA	2	NO BASIN FOUND	15	9
T10000001468	MPMW3-5	37.6277	-122.416	FE	=	48000	UG/L	2014-04-17	ENVIRONMENTAL MONITORING (WELLS)	EDF	SAN MATEO	2	WESTSIDE (2-35)	22	13
T10000001468	MPMW3-5	37.6277	-122.416	FE	=	210000	UG/L	2015-01-14	ENVIRONMENTAL MONITORING (WELLS)	EDF	SAN MATEO	2	WESTSIDE (2-35)	22	13
T0608100661	MW-5A	37.4936	-122.215	FE	ND	0	UG/L	2015-04-01	ENVIRONMENTAL MONITORING (WELLS)	EDF	SAN MATEO	2	SANTA CLARA VALLEY - SAN MATEO PLAIN (2-9.03)	22	13
W0600110001	0110001-010	37.553	-121.999	FE	<	100	UG/L	2014-08-04	WATER SUPPLY (WELLS)	DHS	ALAMEDA	2	SANTA CLARA VALLEY - NILES CONE (2-9.01)	20	10
T10000003609	CW-11A	37.9535	-122.061	FE	=	1500	UG/L	2015-12-16	ENVIRONMENTAL MONITORING (WELLS)	EDF	CONTRA COSTA	2	YGNACIO VALLEY (2-6)	14	3
T0600101516	OW4	37.6933	-122.068	FE	ND	0	UG/L	2015-12-14	ENVIRONMENTAL MONITORING (WELLS)	EDF	ALAMEDA	2	CASTRO VALLEY (2-8)	20	10
T0608100077	MW-15	37.6865	-122.47	FE	=	200000	UG/L	2014-11-07	ENVIRONMENTAL MONITORING (WELLS)	EDF	SAN MATEO	2	WESTSIDE (2-35)	19	11
T10000001468	MPMW3-3	37.6277	-122.416	FE	=	81000	UG/L	2014-07-08	ENVIRONMENTAL MONITORING (WELLS)	EDF	SAN MATEO	2	WESTSIDE (2-35)	22	13
T0608100077	MW-3	37.6865	-122.471	FE	=	1800	UG/L	2014-11-07	ENVIRONMENTAL MONITORING (WELLS)	EDF	SAN MATEO	2	WESTSIDE (2-35)	19	11
L10006514573	G-12	37.4114	-121.971	FE	ND	0	UG/L	2015-03-06	ENVIRONMENTAL MONITORING (WELLS)	EDF	SANTA CLARA	2	SANTA CLARA VALLEY - SANTA CLARA (2-9.02)	25	10
T0609700943	MW-12	38.2498	-122.625	FE	=	81000	UG/L	2014-06-18	ENVIRONMENTAL MONITORING (WELLS)	EDF	SONOMA	2	PETALUMA VALLEY (2-1)	10	3
L10009353957	GW-63C	37.9539	-122.379	FE	ND	136	UG/L	2014-07-29	ENVIRONMENTAL MONITORING (WELLS)	EDF	CONTRA COSTA	2	SANTA CLARA VALLEY - EAST BAY PLAIN (2-9.04)	15	9
T10000003609	CW-10B	37.9536	-122.061	FE	=	1000	UG/L	2015-12-16	ENVIRONMENTAL MONITORING (WELLS)	EDF	CONTRA COSTA	2	YGNACIO VALLEY (2-6)	14	3
T10000003609	CW-10B	37.9536	-122.061	FE	=	1400	UG/L	2016-03-09	ENVIRONMENTAL MONITORING (WELLS)	EDF	CONTRA COSTA	2	YGNACIO VALLEY (2-6)	14	3
T10000003609	CW-10B	37.9536	-122.061	FE	=	600	UG/L	2016-05-25	ENVIRONMENTAL MONITORING (WELLS)	EDF	CONTRA COSTA	2	YGNACIO VALLEY (2-6)	14	3
T0600100939	IW-5	37.7325	-122.201	FE	=	10000	UG/L	2014-02-05	ENVIRONMENTAL MONITORING (WELLS)	EDF	ALAMEDA	2	SANTA CLARA VALLEY - EAST BAY PLAIN (2-9.04)	18	9
T0600100939	IW-5	37.7325	-122.201	FE	=	6700	UG/L	2015-02-05	ENVIRONMENTAL MONITORING (WELLS)	EDF	ALAMEDA	2	SANTA CLARA VALLEY - EAST BAY PLAIN (2-9.04)	18	9
T0601300383	SW-3	37.7767	-121.978	FE	=	35900	UG/L	2015-03-20	ENVIRONMENTAL MONITORING (WELLS)	EDF	CONTRA COSTA	2	SAN RAMON VALLEY (2-7)	16	7
SL20210828	507B1	38.0246	-121.847	FE	=	7360	UG/L	2014-03-31	ENVIRONMENTAL MONITORING (WELLS)	EDF	CONTRA COSTA	2	PITTSBURG PLAIN (2-4)	11	7
T0600100421	MW-18	37.6065	-122.064	FE	=	6300	UG/L	2016-01-06	ENVIRONMENTAL MONITORING (WELLS)	EDF	ALAMEDA	2	SANTA CLARA VALLEY - EAST BAY PLAIN (2-9.04)	20	10
T0600100421	MW-18	37.6065	-122.064	FE	=	750	UG/L	2016-04-14	ENVIRONMENTAL MONITORING (WELLS)	EDF	ALAMEDA	2	SANTA CLARA VALLEY - EAST BAY PLAIN (2-9.04)	20	10
T0600101803	OW-2	37.7686	-122.24	FE	=	1500	UG/L	2014-06-20	ENVIRONMENTAL MONITORING (WELLS)	EDF	ALAMEDA	2	SANTA CLARA VALLEY - EAST BAY PLAIN (2-9.04)	18	9
T0601300383	ESE-3	37.7766	-121.978	FE	=	89900	UG/L	2015-05-13	ENVIRONMENTAL MONITORING (WELLS)	EDF	CONTRA COSTA	2	SAN RAMON VALLEY (2-7)	16	7
T0601300383	ESE-3	37.7766	-121.978	FE	=	459	UG/L	2015-06-22	ENVIRONMENTAL MONITORING (WELLS)	EDF	CONTRA COSTA	2	SAN RAMON VALLEY (2-7)	16	7
T0608164698	MW-5B	37.5888	-122.363	FE	ND	0	UG/L	2013-12-05	ENVIRONMENTAL MONITORING (WELLS)	EDF	SAN MATEO	2	WESTSIDE (2-35)	22	13
SL0604185908	MW-3	38.0322	-122.538	FE	ND	0	UG/L	2015-05-29	ENVIRONMENTAL MONITORING (WELLS)	EDF	MARIN	2	NOVATO VALLEY (2-30)	10	2
SL0608587626	46-A2	37.3883	-121.915	FE	=	47000	UG/L	2015-06-15	ENVIRONMENTAL MONITORING (WELLS)	EDF	SANTA CLARA	2	SANTA CLARA VALLEY - SANTA CLARA (2-9.02)	25	10
T0608164698	MW-4	37.5887	-122.363	FE	=	1100	UG/L	2014-03-12	ENVIRONMENTAL MONITORING (WELLS)	EDF	SAN MATEO	2	WESTSIDE (2-35)	22	13
T10000003434	MW-2	37.7677	-122.169	FE	=	1740	UG/L	2016-08-05	ENVIRONMENTAL MONITORING (WELLS)	EDF	ALAMEDA	2	NO BASIN FOUND	18	9
L10006224883	L-4	37.8719	-122.317	FE	=	31000	UG/L	2016-07-19	ENVIRONMENTAL MONITORING (WELLS)	EDF	ALAMEDA	2	SANTA CLARA VALLEY - EAST BAY PLAIN (2-9.04)	15	9
W0604310011	4310011-103	37.292	-121.92	FE		300	UG/L	2015-03-18	WATER SUPPLY (WELLS)	DHS	SANTA CLARA	2	SANTA CLARA VALLEY - SANTA CLARA (2-9.02)	28	15
W0604310011	4310011-101	37.292	-121.92	FE		150	UG/L	2016-03-01	WATER SUPPLY (WELLS)	DHS	SANTA CLARA	2	SANTA CLARA VALLEY - SANTA CLARA (2-9.02)	28	15
W0604310011	4310011-103	37.292	-121.92	FE		150	UG/L	2015-12-10	WATER SUPPLY (WELLS)	DHS	SANTA CLARA	2	SANTA CLARA VALLEY - SANTA CLARA (2-9.02)	28	15
W0604310012	4310012-031	37.35	-121.959	FE	<	100	UG/L	2015-08-20	WATER SUPPLY (WELLS)	DHS	SANTA CLARA	2	SANTA CLARA VALLEY - SANTA CLARA (2-9.02)	25	10
W0604300986	4300986-001	37.176	-121.761	FE	<	0	UG/L	2015-06-24	WATER SUPPLY (WELLS)	DHS	SANTA CLARA	2	NO BASIN FOUND	29	17
W0604310011	4310011-053	37.379	-121.92	FE		120	UG/L	2014-08-08	WATER SUPPLY (WELLS)	DHS	SANTA CLARA	2	SANTA CLARA VALLEY - SANTA CLARA (2-9.02)	25	10
W0604310011	4310011-067	37.292	-121.88	FE	<	0	UG/L	2016-06-23	WATER SUPPLY (WELLS)	DHS	SANTA CLARA	2	SANTA CLARA VALLEY - SANTA CLARA (2-9.02)	27	15
W0604310014	4310014-003	37.35	-122.078	FE	<	0	UG/L	2015-02-11	WATER SUPPLY (WELLS)	DHS	SANTA CLARA	2	SANTA CLARA VALLEY - SANTA CLARA (2-9.02)	24	13
W0604110020	4110020-006	37.466	-122.157	FE		82	UG/L	2014-05-19	WATER SUPPLY (WELLS)	DHS	SAN MATEO	2	SANTA CLARA VALLEY - SAN MATEO PLAIN (2-9.03)	24	13
W0604110020	4110020-006	37.466	-122.157	FE	<	0	UG/L	2015-02-25	WATER SUPPLY (WELLS)	DHS	SAN MATEO	2	SANTA CLARA VALLEY - SAN MATEO PLAIN (2-9.03)	24	13
W0604110020	4110020-006	37.466	-122.157	FE		30	UG/L	2015-07-21	WATER SUPPLY (WELLS)	DHS	SAN MATEO	2	SANTA CLARA VALLEY - SAN MATEO PLAIN (2-9.03)	24	13
W0604110020	4110020-006	37.466	-122.157	FE		300	UG/L	2016-03-15	WATER SUPPLY (WELLS)	DHS	SAN MATEO	2	SANTA CLARA VALLEY - SAN MATEO PLAIN (2-9.03)	24	13
W0602110006	2110006-004	38.075	-122.791	FE		0.184	UG/L	2015-09-22	WATER SUPPLY (WELLS)	DHS	MARIN	2	NO BASIN FOUND	10	2
W0602801009	2801009-001	38.48	-122.395	FE	<	100	UG/L	2014-10-29	WATER SUPPLY (WELLS)	DHS	NAPA	2	NAPA-SONOMA VALLEY - NAPA VALLEY (2-2.01)	4	3
W0604410016	4410016-004	37.234	-122.078	FE		66	UG/L	2014-05-22	WATER SUPPLY (WELLS)	DHS	SANTA CLARA	2	NO BASIN FOUND	28	15
W0604410016	4410016-004	37.234	-122.078	FE		140	UG/L	2015-03-02	WATER SUPPLY (WELLS)	DHS	SANTA CLARA	2	NO BASIN FOUND	28	15
W0604100538	4100538-004	37.292	-122.276	FE		800	UG/L	2014-03-12	WATER SUPPLY (WELLS)	DHS	SAN MATEO	2	NO BASIN FOUND	24	13
W0604100538	4100538-004	37.292	-122.276	FE		960	UG/L	2014-09-08	WATER SUPPLY (WELLS)	DHS	SAN MATEO	2	NO BASIN FOUND	24	13
W0604100538	4100538-004	37.292	-122.276	FE		960	UG/L	2016-03-09	WATER SUPPLY (WELLS)	DHS	SAN MATEO	2	NO BASIN FOUND	24	13
W0604100538	4100538-004	37.292	-122.276	FE		830	UG/L	2015-06-03	WATER SUPPLY (WELLS)	DHS	SAN MATEO	2	NO BASIN FOUND	24	13
W0604100538	4100538-004	37.292	-122.276	FE		1100	UG/L	2015-12-02	WATER SUPPLY (WELLS)	DHS	SAN MATEO	2	NO BASIN FOUND	24	13
T0609592161	PG-MW1	38.0585	-122.527	FE	ND	0	UG/L	2014-11-13	ENVIRONMENTAL MONITORING (WELLS)	EDF	MARIN	2	NOVATO VALLEY (2-30)	10	2
SL1823a658	P-3	38.0164	-121.853	FE	=	470	UG/L	2015-09-23	ENVIRONMENTAL MONITORING (WELLS)	EDF	CONTRA COSTA	2	PITTSBURG PLAIN (2-4)	11	7
L10006514573	G-08	37.4157	-121.974	FE	=	860	UG/L	2014-03-03	ENVIRONMENTAL MONITORING (WELLS)	EDF	SANTA CLARA	2	SANTA CLARA VALLEY - SANTA CLARA (2-9.02)	25	10
L10006514573	G-10	37.4111	-121.972	FE	=	50	UG/L	2014-07-18	ENVIRONMENTAL MONITORING (WELLS)	EDF	SANTA CLARA	2	SANTA CLARA VALLEY - SANTA CLARA (2-9.02)	25	10
L10006514573	G-08	37.4157	-121.974	FE	=	1300	UG/L	2016-08-25	ENVIRONMENTAL MONITORING (WELLS)	EDF	SANTA CLARA	2	SANTA CLARA VALLEY - SANTA CLARA (2-9.02)	25	10
T0609700943	MW-5	38.2493	-122.626	FE	=	9800	UG/L	2014-11-07	ENVIRONMENTAL MONITORING (WELLS)	EDF	SONOMA	2	PETALUMA VALLEY (2-1)	10	3
T0600101803	MW-2	37.7683	-122.24	FE	=	20000	UG/L	2014-06-19	ENVIRONMENTAL MONITORING (WELLS)	EDF	ALAMEDA	2	SANTA CLARA VALLEY - EAST BAY PLAIN (2-9.04)	18	9
T0600101516	F3	37.6933	-122.068	FE	=	4900	UG/L	2014-10-09	ENVIRONMENTAL MONITORING (WELLS)	EDF	ALAMEDA	2	CASTRO VALLEY (2-8)	20	10
T0600101516	F3	37.6933	-122.068	FE	=	690	UG/L	2015-01-27	ENVIRONMENTAL MONITORING (WELLS)	EDF	ALAMEDA	2	CASTRO VALLEY (2-8)	20	10
T0600101516	F3	37.6933	-122.068	FE	=	710	UG/L	2015-01-27	ENVIRONMENTAL MONITORING (WELLS)	EDF	ALAMEDA	2	CASTRO VALLEY (2-8)	20	10
T0608500710	MW-27	37.3482	-121.892	FE	=	260	UG/L	2014-04-30	ENVIRONMENTAL MONITORING (WELLS)	EDF	SANTA CLARA	2	SANTA CLARA VALLEY - SANTA CLARA (2-9.02)	27	15
T0608500710	MW-27	37.3482	-121.892	FE	=	1700	UG/L	2014-10-06	ENVIRONMENTAL MONITORING (WELLS)	EDF	SANTA CLARA	2	SANTA CLARA VALLEY - SANTA CLARA (2-9.02)	27	15
T0600101410	IP-10	37.6792	-121.776	FE	=	1600	UG/L	2014-11-12	ENVIRONMENTAL MONITORING (WELLS)	EDF	ALAMEDA	2	LIVERMORE VALLEY (2-10)	16	7
T0600101410	IP-10	37.6792	-121.776	FE	=	660	UG/L	2015-01-21	ENVIRONMENTAL MONITORING (WELLS)	EDF	ALAMEDA	2	LIVERMORE VALLEY (2-10)	16	7
L10009353957	GW-3A-2	37.9514	-122.38	FE	=	1190	UG/L	2014-05-01	ENVIRONMENTAL MONITORING (WELLS)	EDF	CONTRA COSTA	2	NO BASIN FOUND	15	9
L10006224883	GW-4	37.8739	-122.317	FE	=	4500	UG/L	2016-07-18	ENVIRONMENTAL MONITORING (WELLS)	EDF	NO COUNTY FOUND	2	SANTA CLARA VALLEY - EAST BAY PLAIN (2-9.04)	15	9
L10009353957	GW-3A-2	37.9514	-122.38	FE	=	448	UG/L	2014-10-07	ENVIRONMENTAL MONITORING (WELLS)	EDF	CONTRA COSTA	2	NO BASIN FOUND	15	9
L10009353957	GW-3A-2	37.9514	-122.38	FE	=	1640	UG/L	2015-01-22	ENVIRONMENTAL MONITORING (WELLS)	EDF	CONTRA COSTA	2	NO BASIN FOUND	15	9
L10009353957	GW-3A-2	37.9514	-122.38	FE	ND	0	UG/L	2015-05-07	ENVIRONMENTAL MONITORING (WELLS)	EDF	CONTRA COSTA	2	NO BASIN FOUND	15	9
L10009353957	GW-3A-2	37.9514	-122.38	FE	=	1530	UG/L	2015-11-05	ENVIRONMENTAL MONITORING (WELLS)	EDF	CONTRA COSTA	2	NO BASIN FOUND	15	9
T0600101016	MW-15	37.6153	-122.082	FE	=	6200	UG/L	2015-10-02	ENVIRONMENTAL MONITORING (WELLS)	EDF	ALAMEDA	2	SANTA CLARA VALLEY - EAST BAY PLAIN (2-9.04)	20	10
T0609700943	MW-7	38.249	-122.626	FE	=	37000	UG/L	2013-12-13	ENVIRONMENTAL MONITORING (WELLS)	EDF	SONOMA	2	PETALUMA VALLEY (2-1)	10	3
T0600101410	IP-5	37.6794	-121.776	FE	ND	0	UG/L	2014-01-21	ENVIRONMENTAL MONITORING (WELLS)	EDF	ALAMEDA	2	LIVERMORE VALLEY (2-10)	16	7
T0601300383	ESE-1	37.7766	-121.978	FE	=	17800	UG/L	2015-03-20	ENVIRONMENTAL MONITORING (WELLS)	EDF	CONTRA COSTA	2	SAN RAMON VALLEY (2-7)	16	7
T0600101410	IP-5	37.6794	-121.776	FE	ND	0	UG/L	2014-06-10	ENVIRONMENTAL MONITORING (WELLS)	EDF	ALAMEDA	2	LIVERMORE VALLEY (2-10)	16	7
SL1823F1131	EX-1	37.3872	-121.942	FE	=	857	UG/L	2015-09-29	ENVIRONMENTAL MONITORING (WELLS)	EDF	SANTA CLARA	2	SANTA CLARA VALLEY - SANTA CLARA (2-9.02)	25	10
T0600101410	MW-2	37.6794	-121.776	FE	=	5100	UG/L	2015-01-21	ENVIRONMENTAL MONITORING (WELLS)	EDF	ALAMEDA	2	LIVERMORE VALLEY (2-10)	16	7
T10000004547	MW-1B	37.2209	-121.977	FE	=	1500	UG/L	2015-04-09	ENVIRONMENTAL MONITORING (WELLS)	EDF	SANTA CLARA	2	SANTA CLARA VALLEY - SANTA CLARA (2-9.02)	28	15
SL18244665	GW-11A	37.9434	-122.374	FE	=	753	UG/L	2015-09-24	ENVIRONMENTAL MONITORING (WELLS)	EDF	CONTRA COSTA	2	SANTA CLARA VALLEY - EAST BAY PLAIN (2-9.04)	15	9
T0609592162	IT-MW-81D	38.0647	-122.526	FE	ND	0	UG/L	2014-11-11	ENVIRONMENTAL MONITORING (WELLS)	EDF	MARIN	2	NO BASIN FOUND	10	2
T0608100661	MW-4	37.4938	-122.215	FE	=	19000	UG/L	2014-03-26	ENVIRONMENTAL MONITORING (WELLS)	EDF	SAN MATEO	2	SANTA CLARA VALLEY - SAN MATEO PLAIN (2-9.03)	22	13
T0608100661	MW-4	37.4938	-122.215	FE	=	1800	UG/L	2014-07-16	ENVIRONMENTAL MONITORING (WELLS)	EDF	SAN MATEO	2	SANTA CLARA VALLEY - SAN MATEO PLAIN (2-9.03)	22	13
T0608100077	MW-1	37.6862	-122.47	FE	=	640	UG/L	2015-04-09	ENVIRONMENTAL MONITORING (WELLS)	EDF	SAN MATEO	2	WESTSIDE (2-35)	19	11
T10000004547	MW-1A	37.2209	-121.977	FE	=	240000	UG/L	2015-04-09	ENVIRONMENTAL MONITORING (WELLS)	EDF	SANTA CLARA	2	SANTA CLARA VALLEY - SANTA CLARA (2-9.02)	28	15
T0600100939	IW-3	37.7328	-122.201	FE	=	22000	UG/L	2014-02-05	ENVIRONMENTAL MONITORING (WELLS)	EDF	ALAMEDA	2	SANTA CLARA VALLEY - EAST BAY PLAIN (2-9.04)	18	9
T0608100147	C-10	37.6289	-122.417	FE	=	4700	UG/L	2014-06-04	ENVIRONMENTAL MONITORING (WELLS)	EDF	SAN MATEO	2	WESTSIDE (2-35)	22	13
L10006514573	G-07	37.4152	-121.973	FE	=	300	UG/L	2016-03-04	ENVIRONMENTAL MONITORING (WELLS)	EDF	SANTA CLARA	2	SANTA CLARA VALLEY - SANTA CLARA (2-9.02)	25	10
L10006514573	H-7	37.4174	-121.969	FE	=	150	UG/L	2016-08-24	ENVIRONMENTAL MONITORING (WELLS)	EDF	SANTA CLARA	2	SANTA CLARA VALLEY - SANTA CLARA (2-9.02)	25	10
L10006514573	G-07	37.4152	-121.973	FE	=	640	UG/L	2016-08-25	ENVIRONMENTAL MONITORING (WELLS)	EDF	SANTA CLARA	2	SANTA CLARA VALLEY - SANTA CLARA (2-9.02)	25	10
L10009353957	GW-3C-1	37.9513	-122.38	FE	=	269	UG/L	2014-02-13	ENVIRONMENTAL MONITORING (WELLS)	EDF	CONTRA COSTA	2	NO BASIN FOUND	15	9
L10009353957	GW-3C-1	37.9513	-122.38	FE	ND	0	UG/L	2014-05-14	ENVIRONMENTAL MONITORING (WELLS)	EDF	CONTRA COSTA	2	NO BASIN FOUND	15	9
L10009353957	GW-3C-1	37.9513	-122.38	FE	ND	0	UG/L	2015-07-09	ENVIRONMENTAL MONITORING (WELLS)	EDF	CONTRA COSTA	2	NO BASIN FOUND	15	9
L10009353957	GW-3C-1	37.9513	-122.38	FE	=	514	UG/L	2014-10-23	ENVIRONMENTAL MONITORING (WELLS)	EDF	CONTRA COSTA	2	NO BASIN FOUND	15	9
T0600100980	MW-5R	37.7661	-122.243	FE	ND	0	UG/L	2014-06-25	ENVIRONMENTAL MONITORING (WELLS)	EDF	ALAMEDA	2	SANTA CLARA VALLEY - EAST BAY PLAIN (2-9.04)	18	9
SL1821Y617	MW-3A	37.4327	-122.1	FE	ND	0	UG/L	2014-12-18	ENVIRONMENTAL MONITORING (WELLS)	EDF	SANTA CLARA	2	SANTA CLARA VALLEY - SANTA CLARA (2-9.02)	24	13
SL1821Y617	MW-6D	37.4332	-122.099	FE	ND	0	UG/L	2014-12-17	ENVIRONMENTAL MONITORING (WELLS)	EDF	SANTA CLARA	2	SANTA CLARA VALLEY - SANTA CLARA (2-9.02)	24	13
T10000001468	MPMW5-4	37.6279	-122.416	FE	=	33000	UG/L	2015-10-21	ENVIRONMENTAL MONITORING (WELLS)	EDF	SAN MATEO	2	WESTSIDE (2-35)	22	13
T0609700788	MW-17D	38.2357	-122.461	FE	=	120	UG/L	2015-02-26	ENVIRONMENTAL MONITORING (WELLS)	EDF	SONOMA	2	NAPA-SONOMA VALLEY - SONOMA VALLEY (2-2.02)	10	3
SL20210828	611C	38.0244	-121.846	FE	ND	0	UG/L	2015-04-17	ENVIRONMENTAL MONITORING (WELLS)	EDF	CONTRA COSTA	2	PITTSBURG PLAIN (2-4)	11	7
T0600113164	DW-2	37.7072	-121.909	FE	=	1740	UG/L	2014-03-04	ENVIRONMENTAL MONITORING (WELLS)	EDF	ALAMEDA	2	LIVERMORE VALLEY (2-10)	16	7
T0609592162	NA-0	38.0555	-122.528	FE	ND	0	UG/L	2014-11-12	ENVIRONMENTAL MONITORING (WELLS)	EDF	MARIN	2	NOVATO VALLEY (2-30)	10	2
T0601300335	MW-3	37.9757	-122.066	FE	=	1500	UG/L	2014-02-25	ENVIRONMENTAL MONITORING (WELLS)	EDF	CONTRA COSTA	2	YGNACIO VALLEY (2-6)	14	3
T0608100147	C-7	37.629	-122.417	FE	=	2700	UG/L	2015-04-21	ENVIRONMENTAL MONITORING (WELLS)	EDF	SAN MATEO	2	WESTSIDE (2-35)	22	13
T0600101016	MW-17	37.6154	-122.082	FE	=	1400	UG/L	2014-09-11	ENVIRONMENTAL MONITORING (WELLS)	EDF	ALAMEDA	2	SANTA CLARA VALLEY - EAST BAY PLAIN (2-9.04)	20	10
T0600141337	MW-2R	37.5521	-122.054	FE	=	16000	UG/L	2015-02-11	ENVIRONMENTAL MONITORING (WELLS)	EDF	ALAMEDA	2	SANTA CLARA VALLEY - NILES CONE (2-9.01)	20	10
T10000003609	CW-4A	37.9532	-122.061	FE	=	1000	UG/L	2016-05-25	ENVIRONMENTAL MONITORING (WELLS)	EDF	CONTRA COSTA	2	YGNACIO VALLEY (2-6)	14	3
T0609592161	IT-GMP-18	38.0638	-122.526	FE	ND	0	UG/L	2014-11-13	ENVIRONMENTAL MONITORING (WELLS)	EDF	MARIN	2	NOVATO VALLEY (2-30)	10	2
T0609700788	MW-17S	38.2357	-122.461	FE	=	1700	UG/L	2014-10-16	ENVIRONMENTAL MONITORING (WELLS)	EDF	SONOMA	2	NAPA-SONOMA VALLEY - SONOMA VALLEY (2-2.02)	10	3
T10000000901	MW11A	37.3508	-121.975	FE	=	56.1	UG/L	2016-02-25	ENVIRONMENTAL MONITORING (WELLS)	EDF	SANTA CLARA	2	SANTA CLARA VALLEY - SANTA CLARA (2-9.02)	25	10
T0608553115	MW-1A	37.3638	-121.828	FE	ND	0	UG/L	2016-06-09	ENVIRONMENTAL MONITORING (WELLS)	EDF	SANTA CLARA	2	SANTA CLARA VALLEY - SANTA CLARA (2-9.02)	27	15
T0600100939	MW-13	37.7328	-122.201	FE	=	2500	UG/L	2014-02-05	ENVIRONMENTAL MONITORING (WELLS)	EDF	ALAMEDA	2	SANTA CLARA VALLEY - EAST BAY PLAIN (2-9.04)	18	9
T10000001468	MPMW5-1	37.6279	-122.416	FE	=	79000	UG/L	2014-01-14	ENVIRONMENTAL MONITORING (WELLS)	EDF	SAN MATEO	2	WESTSIDE (2-35)	22	13
SL18244665	GW-7B	37.9439	-122.367	FE	ND	36.1	UG/L	2015-08-27	ENVIRONMENTAL MONITORING (WELLS)	EDF	CONTRA COSTA	2	SANTA CLARA VALLEY - EAST BAY PLAIN (2-9.04)	15	9
SL18244665	GW-12A	37.9451	-122.372	FE	=	3680	UG/L	2014-09-15	ENVIRONMENTAL MONITORING (WELLS)	EDF	CONTRA COSTA	2	SANTA CLARA VALLEY - EAST BAY PLAIN (2-9.04)	15	9
T0600100421	MW-17	37.6064	-122.065	FE	=	2500	UG/L	2016-01-06	ENVIRONMENTAL MONITORING (WELLS)	EDF	ALAMEDA	2	SANTA CLARA VALLEY - EAST BAY PLAIN (2-9.04)	20	10
T10000001468	MPMW1-2	37.6273	-122.417	FE	ND	0	UG/L	2014-04-16	ENVIRONMENTAL MONITORING (WELLS)	EDF	SAN MATEO	2	WESTSIDE (2-35)	22	13
T0600101410	MW-12	37.6799	-121.777	FE	ND	0	UG/L	2014-01-22	ENVIRONMENTAL MONITORING (WELLS)	EDF	ALAMEDA	2	LIVERMORE VALLEY (2-10)	16	7
T0608553115	MW-3A	37.3637	-121.828	FE	ND	0	UG/L	2016-06-10	ENVIRONMENTAL MONITORING (WELLS)	EDF	SANTA CLARA	2	SANTA CLARA VALLEY - SANTA CLARA (2-9.02)	27	15
T0600101516	OW3	37.6934	-122.068	FE	=	880	UG/L	2014-10-14	ENVIRONMENTAL MONITORING (WELLS)	EDF	ALAMEDA	2	CASTRO VALLEY (2-8)	20	10
L10009353957	CW-9	37.9445	-122.376	FE	=	9040	UG/L	2015-05-20	ENVIRONMENTAL MONITORING (WELLS)	EDF	CONTRA COSTA	2	SANTA CLARA VALLEY - EAST BAY PLAIN (2-9.04)	15	9
L10006514573	G-18	37.4113	-121.972	FE	ND	0	UG/L	2014-07-18	ENVIRONMENTAL MONITORING (WELLS)	EDF	SANTA CLARA	2	SANTA CLARA VALLEY - SANTA CLARA (2-9.02)	25	10
L10006514573	G-18	37.4113	-121.972	FE	ND	0	UG/L	2016-08-23	ENVIRONMENTAL MONITORING (WELLS)	EDF	SANTA CLARA	2	SANTA CLARA VALLEY - SANTA CLARA (2-9.02)	25	10
T0609700943	MW-9	38.2485	-122.626	FE	=	34000	UG/L	2014-06-18	ENVIRONMENTAL MONITORING (WELLS)	EDF	SONOMA	2	PETALUMA VALLEY (2-1)	10	3
L10009353957	GW-61C-2	37.9467	-122.365	FE	ND	0	UG/L	2014-08-12	ENVIRONMENTAL MONITORING (WELLS)	EDF	CONTRA COSTA	2	SANTA CLARA VALLEY - EAST BAY PLAIN (2-9.04)	15	9
T10000001468	MPMW6-5	37.6278	-122.416	FE	ND	0	UG/L	2015-01-13	ENVIRONMENTAL MONITORING (WELLS)	EDF	SAN MATEO	2	WESTSIDE (2-35)	22	13
T0600101483	RW-2	37.5269	-122.006	FE	=	1890	UG/L	2016-02-18	ENVIRONMENTAL MONITORING (WELLS)	EDF	ALAMEDA	2	SANTA CLARA VALLEY - NILES CONE (2-9.01)	25	10
T10000000901	MW3	37.3515	-121.974	FE	=	525	UG/L	2015-08-26	ENVIRONMENTAL MONITORING (WELLS)	EDF	SANTA CLARA	2	SANTA CLARA VALLEY - SANTA CLARA (2-9.02)	25	10
T10000000901	MW3	37.3515	-121.974	FE	=	6.16	UG/L	2016-08-23	ENVIRONMENTAL MONITORING (WELLS)	EDF	SANTA CLARA	2	SANTA CLARA VALLEY - SANTA CLARA (2-9.02)	25	10
T10000000901	MW3	37.3515	-121.974	FE	=	515	UG/L	2016-08-23	ENVIRONMENTAL MONITORING (WELLS)	EDF	SANTA CLARA	2	SANTA CLARA VALLEY - SANTA CLARA (2-9.02)	25	10
L10006514573	G-14	37.4067	-121.974	FE	=	1700	UG/L	2014-07-14	ENVIRONMENTAL MONITORING (WELLS)	EDF	SANTA CLARA	2	SANTA CLARA VALLEY - SANTA CLARA (2-9.02)	25	10
L10006514573	G-05	37.4167	-121.971	FE	=	2900	UG/L	2014-02-26	ENVIRONMENTAL MONITORING (WELLS)	EDF	SANTA CLARA	2	SANTA CLARA VALLEY - SANTA CLARA (2-9.02)	25	10
L10006514573	G-14	37.4067	-121.974	FE	=	1400	UG/L	2014-03-03	ENVIRONMENTAL MONITORING (WELLS)	EDF	SANTA CLARA	2	SANTA CLARA VALLEY - SANTA CLARA (2-9.02)	25	10
T0608100147	C-12	37.6289	-122.417	FE	=	13000	UG/L	2014-07-16	ENVIRONMENTAL MONITORING (WELLS)	EDF	SAN MATEO	2	WESTSIDE (2-35)	22	13
L10009353957	GW-61A-2	37.9467	-122.365	FE	=	491	UG/L	2015-10-22	ENVIRONMENTAL MONITORING (WELLS)	EDF	CONTRA COSTA	2	SANTA CLARA VALLEY - EAST BAY PLAIN (2-9.04)	15	9
T10000001468	MPMW6-4	37.6278	-122.416	FE	=	2900	UG/L	2014-07-10	ENVIRONMENTAL MONITORING (WELLS)	EDF	SAN MATEO	2	WESTSIDE (2-35)	22	13
T0600100980	EW-14	37.7661	-122.243	FE	=	6200	UG/L	2014-06-25	ENVIRONMENTAL MONITORING (WELLS)	EDF	ALAMEDA	2	SANTA CLARA VALLEY - EAST BAY PLAIN (2-9.04)	18	9
T10000001468	MPMW6-4	37.6278	-122.416	FE	=	2400	UG/L	2015-05-06	ENVIRONMENTAL MONITORING (WELLS)	EDF	SAN MATEO	2	WESTSIDE (2-35)	22	13
T10000005837	AWR-4	37.512	-122.256	FE	ND	0	UG/L	2014-10-02	ENVIRONMENTAL MONITORING (WELLS)	EDF	SAN MATEO	2	SANTA CLARA VALLEY - SAN MATEO PLAIN (2-9.03)	22	13
T0608100147	C-4	37.6288	-122.417	FE	=	7400	UG/L	2014-04-29	ENVIRONMENTAL MONITORING (WELLS)	EDF	SAN MATEO	2	WESTSIDE (2-35)	22	13
T0608500710	MW-22	37.3484	-121.892	FE	ND	0	UG/L	2015-06-23	ENVIRONMENTAL MONITORING (WELLS)	EDF	SANTA CLARA	2	SANTA CLARA VALLEY - SANTA CLARA (2-9.02)	27	15
T0608500710	MW-22	37.3484	-121.892	FE	=	240	UG/L	2014-01-23	ENVIRONMENTAL MONITORING (WELLS)	EDF	SANTA CLARA	2	SANTA CLARA VALLEY - SANTA CLARA (2-9.02)	27	15
T0600101410	IP-9	37.6792	-121.776	FE	ND	0	UG/L	2014-01-22	ENVIRONMENTAL MONITORING (WELLS)	EDF	ALAMEDA	2	LIVERMORE VALLEY (2-10)	16	7
T0608500710	MW-4	37.3482	-121.893	FE	ND	0	UG/L	2014-01-22	ENVIRONMENTAL MONITORING (WELLS)	EDF	SANTA CLARA	2	SANTA CLARA VALLEY - SANTA CLARA (2-9.02)	27	15
T10000000901	MW4	37.3518	-121.974	FE	=	7.4	UG/L	2014-03-03	ENVIRONMENTAL MONITORING (WELLS)	EDF	SANTA CLARA	2	SANTA CLARA VALLEY - SANTA CLARA (2-9.02)	25	10
T10000000901	MW4	37.3518	-121.974	FE	=	11.2	UG/L	2014-09-08	ENVIRONMENTAL MONITORING (WELLS)	EDF	SANTA CLARA	2	SANTA CLARA VALLEY - SANTA CLARA (2-9.02)	25	10
T060130953	MW-1R	37.9749	-122.026	FE	=	20000	UG/L	2013-12-30	ENVIRONMENTAL MONITORING (WELLS)	EDF	CONTRA COSTA	2	CLAYTON VALLEY (2-5)	14	7
L10006514573	G-21	37.4174	-121.969	FE	ND	0	UG/L	2016-08-24	ENVIRONMENTAL MONITORING (WELLS)	EDF	SANTA CLARA	2	SANTA CLARA VALLEY - SANTA CLARA (2-9.02)	25	10
W0604310011	4310011-011	37.263	-121.88	FE		250	UG/L	2014-07-24	WATER SUPPLY (WELLS)	DHS	SANTA CLARA	2	SANTA CLARA VALLEY - SANTA CLARA (2-9.02)	28	15
W0604110010	4110010-011	37.553	-122.514	FE		290	UG/L	2016-01-28	WATER SUPPLY (WELLS)	DHS	SAN MATEO	2	NO BASIN FOUND	22	13
W0604900585	4900585-001	38.393	-122.593	FE		0	UG/L	2016-04-18	WATER SUPPLY (WELLS)	DHS	SONOMA	2	NO BASIN FOUND	4	2
W0602800625	2800625-003	38.538	-122.474	FE		180	UG/L	2015-03-17	WATER SUPPLY (WELLS)	DHS	NAPA	2	NO BASIN FOUND	4	3
W0602800625	2800625-003	38.538	-122.474	FE	<	100	UG/L	2014-12-16	WATER SUPPLY (WELLS)	DHS	NAPA	2	NO BASIN FOUND	4	3
W0604300924	4300924-001	37.176	-121.721	FE		242	UG/L	2015-12-14	WATER SUPPLY (WELLS)	DHS	SANTA CLARA	2	SANTA CLARA VALLEY - SANTA CLARA (2-9.02)	29	17
W0602800625	2800625-003	38.538	-122.474	FE	<	100	UG/L	2015-12-22	WATER SUPPLY (WELLS)	DHS	NAPA	2	NO BASIN FOUND	4	3
W0604310011	4310011-052	37.379	-121.92	FE		160	UG/L	2014-02-06	WATER SUPPLY (WELLS)	DHS	SANTA CLARA	2	SANTA CLARA VALLEY - SANTA CLARA (2-9.02)	25	10
W0604310011	4310011-127	37.321	-121.959	FE		390	UG/L	2014-09-16	WATER SUPPLY (WELLS)	DHS	SANTA CLARA	2	SANTA CLARA VALLEY - SANTA CLARA (2-9.02)	28	15
W0604310011	4310011-112	37.321	-121.88	FE	<	100	UG/L	2015-03-03	WATER SUPPLY (WELLS)	DHS	SANTA CLARA	2	SANTA CLARA VALLEY - SANTA CLARA (2-9.02)	27	15
W0600110003	0110003-014	37.669	-121.801	FE		4.329	UG/L	2015-08-10	WATER SUPPLY (WELLS)	DHS	ALAMEDA	2	LIVERMORE VALLEY (2-10)	16	7
W0602110008	2110008-004	38.248	-122.95	FE		780	UG/L	2016-08-03	WATER SUPPLY (WELLS)	DHS	MARIN	2	SAND POINT AREA (2-27)	10	2
W0604310011	4310011-094	37.35	-121.88	FE		120	UG/L	2014-11-05	WATER SUPPLY (WELLS)	DHS	SANTA CLARA	2	SANTA CLARA VALLEY - SANTA CLARA (2-9.02)	27	15
W0602110007	2110007-002	38.248	-122.95	FE		60000	UG/L	2016-07-18	WATER SUPPLY (WELLS)	DHS	MARIN	2	WILSON GROVE FORMATION HIGHLANDS (1-59)	10	2
W0604310011	4310011-090	37.35	-121.88	FE	<	0	UG/L	2015-11-18	WATER SUPPLY (WELLS)	DHS	SANTA CLARA	2	SANTA CLARA VALLEY - SANTA CLARA (2-9.02)	27	15
W0604110010	4110010-001	37.524	-122.514	FE		2500	UG/L	2015-08-17	WATER SUPPLY (WELLS)	DHS	SAN MATEO	2	HALF MOON BAY TERRACE (2-22)	22	13
W0602110007	2110007-001	38.248	-122.95	FE	<	0	UG/L	2016-04-26	WATER SUPPLY (WELLS)	DHS	MARIN	2	NO BASIN FOUND	10	2
W0604900563	4900563-002	38.306	-122.474	FE	<	100	UG/L	2014-04-30	WATER SUPPLY (WELLS)	DHS	SONOMA	2	NO BASIN FOUND	4	2
W0604110028	4110028-003	37.495	-122.514	FE		3000	UG/L	2014-04-21	WATER SUPPLY (WELLS)	DHS	SAN MATEO	2	HALF MOON BAY TERRACE (2-22)	22	13
W0604100510	4100510-001	37.321	-122.276	FE		130	UG/L	2014-12-17	WATER SUPPLY (WELLS)	DHS	SAN MATEO	2	NO BASIN FOUND	24	13
W0604100510	4100510-001	37.321	-122.276	FE		140	UG/L	2015-11-11	WATER SUPPLY (WELLS)	DHS	SAN MATEO	2	NO BASIN FOUND	24	13
W0600110001	0110001-050	37.524	-121.999	FE	<	100	UG/L	2016-07-19	WATER SUPPLY (WELLS)	DHS	ALAMEDA	2	SANTA CLARA VALLEY - NILES CONE (2-9.01)	25	10
W0602100518	2100518-001	38.075	-122.831	FE	<	0	UG/L	2014-01-07	WATER SUPPLY (WELLS)	DHS	MARIN	2	NO BASIN FOUND	10	2
W0604110023	4110023-008	37.611	-122.395	FE	<	0	UG/L	2016-01-27	WATER SUPPLY (WELLS)	DHS	SAN MATEO	2	WESTSIDE (2-35)	22	13
T0608500710	MW-19	37.3487	-121.893	FE	ND	0	UG/L	2015-09-14	ENVIRONMENTAL MONITORING (WELLS)	EDF	SANTA CLARA	2	SANTA CLARA VALLEY - SANTA CLARA (2-9.02)	27	15
T10000003609	CW-1A	37.9528	-122.061	FE	=	120	UG/L	2015-12-16	ENVIRONMENTAL MONITORING (WELLS)	EDF	CONTRA COSTA	2	YGNACIO VALLEY (2-6)	14	3
T10000003609	CW-1A	37.9528	-122.061	FE	=	1000	UG/L	2016-05-25	ENVIRONMENTAL MONITORING (WELLS)	EDF	CONTRA COSTA	2	YGNACIO VALLEY (2-6)	14	3
T10000003609	CW-1A	37.9528	-122.061	FE	=	320	UG/L	2016-08-29	ENVIRONMENTAL MONITORING (WELLS)	EDF	CONTRA COSTA	2	YGNACIO VALLEY (2-6)	14	3
T0600101410	DW-1	37.6794	-121.776	FE	=	910	UG/L	2014-01-22	ENVIRONMENTAL MONITORING (WELLS)	EDF	ALAMEDA	2	LIVERMORE VALLEY (2-10)	16	7
T0600101410	DW-1	37.6794	-121.776	FE	ND	0	UG/L	2014-06-11	ENVIRONMENTAL MONITORING (WELLS)	EDF	ALAMEDA	2	LIVERMORE VALLEY (2-10)	16	7
T0600101866	MW-11	37.807	-122.314	FE	=	2000	UG/L	2013-12-12	ENVIRONMENTAL MONITORING (WELLS)	EDF	ALAMEDA	2	SANTA CLARA VALLEY - EAST BAY PLAIN (2-9.04)	18	9
T0608100661	MW-7	37.4947	-122.216	FE	=	6300	UG/L	2014-03-26	ENVIRONMENTAL MONITORING (WELLS)	EDF	SAN MATEO	2	SANTA CLARA VALLEY - SAN MATEO PLAIN (2-9.03)	22	13
T0600101516	C3	37.6934	-122.068	FE	=	3300	UG/L	2014-10-14	ENVIRONMENTAL MONITORING (WELLS)	EDF	ALAMEDA	2	CASTRO VALLEY (2-8)	20	10
T0600101516	C3	37.6934	-122.068	FE	=	3300	UG/L	2015-01-28	ENVIRONMENTAL MONITORING (WELLS)	EDF	ALAMEDA	2	CASTRO VALLEY (2-8)	20	10
T0600101410	DW-3	37.6796	-121.777	FE	=	560	UG/L	2014-08-13	ENVIRONMENTAL MONITORING (WELLS)	EDF	ALAMEDA	2	LIVERMORE VALLEY (2-10)	16	7
T0600101410	DW-3	37.6796	-121.777	FE	=	1100	UG/L	2015-01-20	ENVIRONMENTAL MONITORING (WELLS)	EDF	ALAMEDA	2	LIVERMORE VALLEY (2-10)	16	7
T0609592161	MW-M15	38.0603	-122.527	FE	=	3700	UG/L	2014-11-14	ENVIRONMENTAL MONITORING (WELLS)	EDF	MARIN	2	NOVATO VALLEY (2-30)	10	2
L10006514573	G-19	37.4109	-121.973	FE	=	89	UG/L	2014-02-27	ENVIRONMENTAL MONITORING (WELLS)	EDF	SANTA CLARA	2	SANTA CLARA VALLEY - SANTA CLARA (2-9.02)	25	10
L10006514573	G-19	37.4109	-121.973	FE	ND	0	UG/L	2015-08-12	ENVIRONMENTAL MONITORING (WELLS)	EDF	SANTA CLARA	2	SANTA CLARA VALLEY - SANTA CLARA (2-9.02)	25	10
T0608100147	E-1	37.6288	-122.417	FE	=	2600	UG/L	2015-04-21	ENVIRONMENTAL MONITORING (WELLS)	EDF	SAN MATEO	2	WESTSIDE (2-35)	22	13
SL1821Y617	GW-1	37.433	-122.1	FE	=	220	UG/L	2014-12-18	ENVIRONMENTAL MONITORING (WELLS)	EDF	SANTA CLARA	2	SANTA CLARA VALLEY - SANTA CLARA (2-9.02)	24	13
T0608501548	MW-3S-P	37.3003	-121.822	FE	=	6200	UG/L	2013-12-19	ENVIRONMENTAL MONITORING (WELLS)	EDF	SANTA CLARA	2	SANTA CLARA VALLEY - SANTA CLARA (2-9.02)	27	15
W0600110010	0110010-012	37.698	-121.88	FE		0	UG/L	2016-04-06	WATER SUPPLY (WELLS)	DHS	ALAMEDA	2	LIVERMORE VALLEY (2-10)	16	7
T0608553115	MW-4A	37.3636	-121.828	FE	ND	0	UG/L	2016-06-10	ENVIRONMENTAL MONITORING (WELLS)	EDF	SANTA CLARA	2	SANTA CLARA VALLEY - SANTA CLARA (2-9.02)	27	15
T0600101516	C2	37.6934	-122.068	FE	=	3100	UG/L	2015-01-28	ENVIRONMENTAL MONITORING (WELLS)	EDF	ALAMEDA	2	CASTRO VALLEY (2-8)	20	10
T0609700943	RW-1	38.2492	-122.626	FE	=	6200	UG/L	2014-06-18	ENVIRONMENTAL MONITORING (WELLS)	EDF	SONOMA	2	PETALUMA VALLEY (2-1)	10	3
T10000001468	MPMW4-5	37.6275	-122.416	FE	=	2700	UG/L	2014-10-15	ENVIRONMENTAL MONITORING (WELLS)	EDF	SAN MATEO	2	WESTSIDE (2-35)	22	13
T10000001468	MPMW2-5	37.6275	-122.416	FE	=	100000	UG/L	2014-04-17	ENVIRONMENTAL MONITORING (WELLS)	EDF	SAN MATEO	2	WESTSIDE (2-35)	22	13
T10000001468	MPMW2-5	37.6275	-122.416	FE	=	53000	UG/L	2015-05-06	ENVIRONMENTAL MONITORING (WELLS)	EDF	SAN MATEO	2	WESTSIDE (2-35)	22	13
L10009353957	GW-38A	37.9539	-122.376	FE	=	465	UG/L	2014-07-24	ENVIRONMENTAL MONITORING (WELLS)	EDF	CONTRA COSTA	2	SANTA CLARA VALLEY - EAST BAY PLAIN (2-9.04)	15	9
W0604310013	4310013-002	37.437	-122.197	FE	<	100	UG/L	2014-11-12	WATER SUPPLY (WELLS)	DHS	SANTA CLARA	2	SANTA CLARA VALLEY - SANTA CLARA (2-9.02)	24	13
W0602800032	2800032-001	38.596	-122.553	FE	<	100	UG/L	2015-07-14	WATER SUPPLY (WELLS)	DHS	NAPA	2	NAPA-SONOMA VALLEY - NAPA VALLEY (2-2.01)	4	3
W0604100533	4100533-003	37.379	-122.276	FE		3200	UG/L	2016-04-22	WATER SUPPLY (WELLS)	DHS	SAN MATEO	2	NO BASIN FOUND	24	13
W0604100533	4100533-003	37.379	-122.276	FE		1400	UG/L	2014-11-25	WATER SUPPLY (WELLS)	DHS	SAN MATEO	2	NO BASIN FOUND	24	13
W0604100533	4100533-003	37.379	-122.276	FE		4800	UG/L	2015-03-11	WATER SUPPLY (WELLS)	DHS	SAN MATEO	2	NO BASIN FOUND	24	13
SL1821Y617	GW-3	37.4333	-122.099	FE	=	1100	UG/L	2014-12-17	ENVIRONMENTAL MONITORING (WELLS)	EDF	SANTA CLARA	2	SANTA CLARA VALLEY - SANTA CLARA (2-9.02)	24	13
T0608100147	C-11	37.6289	-122.417	FE	=	4800	UG/L	2014-03-13	ENVIRONMENTAL MONITORING (WELLS)	EDF	SAN MATEO	2	WESTSIDE (2-35)	22	13
T0608100147	C-11	37.6289	-122.417	FE	=	1800	UG/L	2015-07-14	ENVIRONMENTAL MONITORING (WELLS)	EDF	SAN MATEO	2	WESTSIDE (2-35)	22	13
L10006514573	G-2R	37.4103	-121.967	FE	ND	0	UG/L	2016-03-03	ENVIRONMENTAL MONITORING (WELLS)	EDF	SANTA CLARA	2	SANTA CLARA VALLEY - SANTA CLARA (2-9.02)	25	10
T10000000666	MW-03	37.8923	-122.112	FE	ND	0	UG/L	2014-05-29	ENVIRONMENTAL MONITORING (WELLS)	EDF	CONTRA COSTA	2	NO BASIN FOUND	16	7
T10000000666	MW-03	37.8923	-122.112	FE	=	631	UG/L	2014-06-24	ENVIRONMENTAL MONITORING (WELLS)	EDF	CONTRA COSTA	2	NO BASIN FOUND	16	7
SL20210828	116B1	38.0222	-121.85	FE	=	125	UG/L	2014-03-27	ENVIRONMENTAL MONITORING (WELLS)	EDF	CONTRA COSTA	2	PITTSBURG PLAIN (2-4)	11	7
SL20210828	116B1	38.0222	-121.85	FE	=	136	UG/L	2015-04-14	ENVIRONMENTAL MONITORING (WELLS)	EDF	CONTRA COSTA	2	PITTSBURG PLAIN (2-4)	11	7
T0600100980	MW-6R	37.7662	-122.243	FE	=	2900	UG/L	2014-06-25	ENVIRONMENTAL MONITORING (WELLS)	EDF	ALAMEDA	2	SANTA CLARA VALLEY - EAST BAY PLAIN (2-9.04)	18	9
T0608164698	MW-5A	37.5888	-122.363	FE	=	4000	UG/L	2014-03-12	ENVIRONMENTAL MONITORING (WELLS)	EDF	SAN MATEO	2	WESTSIDE (2-35)	22	13
T0608500710	EW-1	37.3482	-121.892	FE	=	1300	UG/L	2014-01-23	ENVIRONMENTAL MONITORING (WELLS)	EDF	SANTA CLARA	2	SANTA CLARA VALLEY - SANTA CLARA (2-9.02)	27	15
SL0608125065	MW-84	37.4172	-122.207	FE	ND	0	UG/L	2014-08-20	ENVIRONMENTAL MONITORING (WELLS)	EDF	SAN MATEO	2	SANTA CLARA VALLEY - SAN MATEO PLAIN (2-9.03)	24	13
T10000003609	CW-4B	37.9532	-122.061	FE	ND	0	UG/L	2016-03-09	ENVIRONMENTAL MONITORING (WELLS)	EDF	CONTRA COSTA	2	YGNACIO VALLEY (2-6)	14	3
T10000003609	CW-6A	37.9535	-122.061	FE	=	220	UG/L	2016-03-09	ENVIRONMENTAL MONITORING (WELLS)	EDF	CONTRA COSTA	2	YGNACIO VALLEY (2-6)	14	3
T0600100939	MW-9	37.7326	-122.202	FE	=	14000	UG/L	2015-02-05	ENVIRONMENTAL MONITORING (WELLS)	EDF	ALAMEDA	2	SANTA CLARA VALLEY - EAST BAY PLAIN (2-9.04)	18	9
T10000003609	CW-2A	37.9529	-122.061	FE	=	1200	UG/L	2015-12-16	ENVIRONMENTAL MONITORING (WELLS)	EDF	CONTRA COSTA	2	YGNACIO VALLEY (2-6)	14	3
T10000003609	CW-2A	37.9529	-122.061	FE	=	240	UG/L	2016-08-29	ENVIRONMENTAL MONITORING (WELLS)	EDF	CONTRA COSTA	2	YGNACIO VALLEY (2-6)	14	3
T10000001468	MPMW4-3	37.6275	-122.416	FE	=	46000	UG/L	2014-10-15	ENVIRONMENTAL MONITORING (WELLS)	EDF	SAN MATEO	2	WESTSIDE (2-35)	22	13
T10000001468	MPMW4-3	37.6275	-122.416	FE	=	48000	UG/L	2015-01-14	ENVIRONMENTAL MONITORING (WELLS)	EDF	SAN MATEO	2	WESTSIDE (2-35)	22	13
T10000001468	MPMW4-3	37.6275	-122.416	FE	=	31000	UG/L	2016-01-13	ENVIRONMENTAL MONITORING (WELLS)	EDF	SAN MATEO	2	WESTSIDE (2-35)	22	13
T0600101803	EW-5	37.7685	-122.24	FE	=	22000	UG/L	2014-10-03	ENVIRONMENTAL MONITORING (WELLS)	EDF	ALAMEDA	2	SANTA CLARA VALLEY - EAST BAY PLAIN (2-9.04)	18	9
T0600101803	EW-5	37.7685	-122.24	FE	=	4200	UG/L	2015-06-18	ENVIRONMENTAL MONITORING (WELLS)	EDF	ALAMEDA	2	SANTA CLARA VALLEY - EAST BAY PLAIN (2-9.04)	18	9
T0601300383	MW-7	37.7767	-121.978	FE	=	54000	UG/L	2014-08-21	ENVIRONMENTAL MONITORING (WELLS)	EDF	CONTRA COSTA	2	SAN RAMON VALLEY (2-7)	16	7
T0600100939	IW-4	37.7325	-122.202	FE	=	3700	UG/L	2014-02-05	ENVIRONMENTAL MONITORING (WELLS)	EDF	ALAMEDA	2	SANTA CLARA VALLEY - EAST BAY PLAIN (2-9.04)	18	9
L10006514573	G-17	37.4132	-121.971	FE	ND	0	UG/L	2016-08-25	ENVIRONMENTAL MONITORING (WELLS)	EDF	SANTA CLARA	2	SANTA CLARA VALLEY - SANTA CLARA (2-9.02)	25	10
T0608100553	MW-6B	37.5484	-122.309	FE	ND	0	UG/L	2015-08-07	ENVIRONMENTAL MONITORING (WELLS)	EDF	SAN MATEO	2	SANTA CLARA VALLEY - SAN MATEO PLAIN (2-9.03)	22	13
SL1823a658	P-11	38.0172	-121.853	FE	=	1100	UG/L	2015-09-23	ENVIRONMENTAL MONITORING (WELLS)	EDF	CONTRA COSTA	2	PITTSBURG PLAIN (2-4)	11	7
W0602110501	2110501-004	38.046	-122.87	FE		110	UG/L	2015-01-06	WATER SUPPLY (WELLS)	DHS	MARIN	2	NO BASIN FOUND	10	2
W0602110501	2110501-004	38.046	-122.87	FE	<	0	UG/L	2015-03-10	WATER SUPPLY (WELLS)	DHS	MARIN	2	NO BASIN FOUND	10	2
W0602110501	2110501-004	38.046	-122.87	FE		100	UG/L	2015-08-04	WATER SUPPLY (WELLS)	DHS	MARIN	2	NO BASIN FOUND	10	2
W0602110501	2110501-004	38.046	-122.87	FE		0	UG/L	2015-10-20	WATER SUPPLY (WELLS)	DHS	MARIN	2	NO BASIN FOUND	10	2
W0602110501	2110501-004	38.046	-122.87	FE		170	UG/L	2016-03-08	WATER SUPPLY (WELLS)	DHS	MARIN	2	NO BASIN FOUND	10	2
W0602110006	2110006-001	38.075	-122.791	FE		0.34	UG/L	2014-11-18	WATER SUPPLY (WELLS)	DHS	MARIN	2	NO BASIN FOUND	10	2
W0602110007	2110007-008	38.248	-122.95	FE		2800	UG/L	2014-04-15	WATER SUPPLY (WELLS)	DHS	MARIN	2	WILSON GROVE FORMATION HIGHLANDS (1-59)	10	2
W0602110007	2110007-003	38.248	-122.95	FE		7200	UG/L	2015-06-04	WATER SUPPLY (WELLS)	DHS	MARIN	2	WILSON GROVE FORMATION HIGHLANDS (1-59)	10	2
W0604300792	4300792-001	37.321	-121.761	FE	<	0	UG/L	2015-12-14	WATER SUPPLY (WELLS)	DHS	SANTA CLARA	2	SANTA CLARA VALLEY - SANTA CLARA (2-9.02)	25	15
W0604900563	4900563-001	38.306	-122.474	FE		340	UG/L	2014-04-30	WATER SUPPLY (WELLS)	DHS	SONOMA	2	NO BASIN FOUND	4	2
W0604110009	4110009-003	37.669	-122.435	FE	<	0	UG/L	2015-06-25	WATER SUPPLY (WELLS)	DHS	SAN MATEO	2	WESTSIDE (2-35)	22	13
W0604310011	4310011-136	37.321	-121.959	FE	<	0	UG/L	2015-06-19	WATER SUPPLY (WELLS)	DHS	SANTA CLARA	2	SANTA CLARA VALLEY - SANTA CLARA (2-9.02)	28	15
W0604310011	4310011-138	37.321	-121.959	FE	<	100	UG/L	2014-12-03	WATER SUPPLY (WELLS)	DHS	SANTA CLARA	2	SANTA CLARA VALLEY - SANTA CLARA (2-9.02)	28	15
W0604110023	4110023-010	37.64	-122.435	FE	<	0	UG/L	2015-01-14	WATER SUPPLY (WELLS)	DHS	SAN MATEO	2	WESTSIDE (2-35)	22	13
W0604310011	4310011-131	37.321	-121.959	FE	<	0	UG/L	2016-02-04	WATER SUPPLY (WELLS)	DHS	SANTA CLARA	2	SANTA CLARA VALLEY - SANTA CLARA (2-9.02)	28	15
W0604310011	4310011-115	37.321	-121.88	FE		110	UG/L	2015-11-09	WATER SUPPLY (WELLS)	DHS	SANTA CLARA	2	SANTA CLARA VALLEY - SANTA CLARA (2-9.02)	27	15
W0604310011	4310011-028	37.321	-121.92	FE	<	100	UG/L	2015-01-15	WATER SUPPLY (WELLS)	DHS	SANTA CLARA	2	SANTA CLARA VALLEY - SANTA CLARA (2-9.02)	28	15
W0604310011	4310011-092	37.35	-121.88	FE		100	UG/L	2016-06-14	WATER SUPPLY (WELLS)	DHS	SANTA CLARA	2	SANTA CLARA VALLEY - SANTA CLARA (2-9.02)	27	15
W0600110010	0110010-006	37.698	-121.88	FE	<	0	UG/L	2014-06-11	WATER SUPPLY (WELLS)	DHS	ALAMEDA	2	LIVERMORE VALLEY (2-10)	16	7
W0600110001	0110001-044	37.553	-121.959	FE	<	100	UG/L	2014-07-28	WATER SUPPLY (WELLS)	DHS	ALAMEDA	2	SANTA CLARA VALLEY - NILES CONE (2-9.01)	20	10
W0600110010	0110010-013	37.698	-121.88	FE		0	UG/L	2016-04-04	WATER SUPPLY (WELLS)	DHS	ALAMEDA	2	LIVERMORE VALLEY (2-10)	16	7
W0600110001	0110001-044	37.553	-121.959	FE	<	100	UG/L	2015-07-13	WATER SUPPLY (WELLS)	DHS	ALAMEDA	2	SANTA CLARA VALLEY - NILES CONE (2-9.01)	20	10
W0600110001	0110001-044	37.553	-121.959	FE	<	100	UG/L	2016-07-11	WATER SUPPLY (WELLS)	DHS	ALAMEDA	2	SANTA CLARA VALLEY - NILES CONE (2-9.01)	20	10
W0600110010	0110010-007	37.698	-121.88	FE		0	UG/L	2016-03-29	WATER SUPPLY (WELLS)	DHS	ALAMEDA	2	LIVERMORE VALLEY (2-10)	16	7
W0600110010	0110010-007	37.698	-121.88	FE		0	UG/L	2016-07-11	WATER SUPPLY (WELLS)	DHS	ALAMEDA	2	LIVERMORE VALLEY (2-10)	16	7
W0604910006	4910006-009	38.248	-122.633	FE		480	UG/L	2016-06-22	WATER SUPPLY (WELLS)	DHS	SONOMA	2	PETALUMA VALLEY (2-1)	10	3
W0600110010	0110010-005	37.669	-121.92	FE		0	UG/L	2016-04-04	WATER SUPPLY (WELLS)	DHS	ALAMEDA	2	LIVERMORE VALLEY (2-10)	16	7
W0604910006	4910006-026	38.248	-122.633	FE		280	UG/L	2016-03-09	WATER SUPPLY (WELLS)	DHS	SONOMA	2	PETALUMA VALLEY (2-1)	10	3
W0602800035	2800035-001	38.509	-122.435	FE		1500	UG/L	2015-08-03	WATER SUPPLY (WELLS)	DHS	NAPA	2	NO BASIN FOUND	4	3
W0602800035	2800035-001	38.509	-122.435	FE		1500	UG/L	2016-05-10	WATER SUPPLY (WELLS)	DHS	NAPA	2	NO BASIN FOUND	4	3
W0600110001	0110001-045	37.553	-122.038	FE	<	100	UG/L	2014-07-22	WATER SUPPLY (WELLS)	DHS	ALAMEDA	2	SANTA CLARA VALLEY - NILES CONE (2-9.01)	25	10
W0604310011	4310011-106	37.292	-121.92	FE		260	UG/L	2015-03-20	WATER SUPPLY (WELLS)	DHS	SANTA CLARA	2	SANTA CLARA VALLEY - SANTA CLARA (2-9.02)	28	15
W0604110010	4110010-008	37.553	-122.514	FE	<	0	UG/L	2014-03-18	WATER SUPPLY (WELLS)	DHS	SAN MATEO	2	NO BASIN FOUND	22	13
W0604310014	4310014-007	37.35	-122.038	FE	<	0	UG/L	2015-02-11	WATER SUPPLY (WELLS)	DHS	SANTA CLARA	2	SANTA CLARA VALLEY - SANTA CLARA (2-9.02)	24	13
W0604110019	4110019-001	37.466	-122.157	FE	<	100	UG/L	2014-12-11	WATER SUPPLY (WELLS)	DHS	SAN MATEO	2	SANTA CLARA VALLEY - SAN MATEO PLAIN (2-9.03)	24	13
W0604110020	4110020-004	37.466	-122.157	FE	<	0	UG/L	2014-09-03	WATER SUPPLY (WELLS)	DHS	SAN MATEO	2	SANTA CLARA VALLEY - SAN MATEO PLAIN (2-9.03)	24	13
W0604110019	4110019-001	37.466	-122.157	FE	<	0	UG/L	2015-11-24	WATER SUPPLY (WELLS)	DHS	SAN MATEO	2	SANTA CLARA VALLEY - SAN MATEO PLAIN (2-9.03)	24	13
W0604110020	4110020-005	37.466	-122.157	FE	<	0	UG/L	2015-06-09	WATER SUPPLY (WELLS)	DHS	SAN MATEO	2	SANTA CLARA VALLEY - SAN MATEO PLAIN (2-9.03)	24	13
W0604310001	4310001-035	37.408	-122.118	FE		1039	UG/L	2014-03-05	WATER SUPPLY (WELLS)	DHS	SANTA CLARA	2	SANTA CLARA VALLEY - SANTA CLARA (2-9.02)	24	13
W0602801080	2801080-001	38.219	-122.316	FE		2700	UG/L	2014-07-31	WATER SUPPLY (WELLS)	DHS	NAPA	2	NAPA-SONOMA VALLEY - NAPA-SONOMA LOWLANDS (2-2.03)	4	3
W0604100538	4100538-005	37.292	-122.276	FE		380	UG/L	2014-06-02	WATER SUPPLY (WELLS)	DHS	SAN MATEO	2	NO BASIN FOUND	24	13
W0604100538	4100538-005	37.292	-122.276	FE		1400	UG/L	2014-12-04	WATER SUPPLY (WELLS)	DHS	SAN MATEO	2	NO BASIN FOUND	24	13
W0602000573	2000573-001	38.248	-122.95	FE		970	UG/L	2016-04-05	WATER SUPPLY (WELLS)	DHS	MARIN	2	NO BASIN FOUND	10	2
W0604300522	4300522-001	37.205	-122.038	FE	<	0	UG/L	2014-09-08	WATER SUPPLY (WELLS)	DHS	SANTA CLARA	2	NO BASIN FOUND	28	15
W0600707589	0707589-001	38.017	-121.92	FE		280	UG/L	2016-07-21	WATER SUPPLY (WELLS)	DHS	CONTRA COSTA	2	PITTSBURG PLAIN (2-4)	14	7
W0600110010	0110010-017	37.698	-121.84	FE		0	UG/L	2015-09-10	WATER SUPPLY (WELLS)	DHS	ALAMEDA	2	LIVERMORE VALLEY (2-10)	16	7
W0604901080	4901080-009	38.161	-122.474	FE		170	UG/L	2014-06-16	WATER SUPPLY (WELLS)	DHS	SONOMA	2	PETALUMA VALLEY (2-1)	10	3
W0602800613	2800613-001	38.364	-122.435	FE	<	0	UG/L	2016-06-14	WATER SUPPLY (WELLS)	DHS	NAPA	2	NO BASIN FOUND	4	3
W0602801016	2801016-002	38.335	-122.395	FE	<	0	UG/L	2015-05-18	WATER SUPPLY (WELLS)	DHS	NAPA	2	NO BASIN FOUND	4	3
W0604110028	4110028-002	37.524	-122.514	FE		8500	UG/L	2014-10-20	WATER SUPPLY (WELLS)	DHS	SAN MATEO	2	HALF MOON BAY TERRACE (2-22)	22	13
W0604110028	4110028-002	37.524	-122.514	FE		3400	UG/L	2015-05-18	WATER SUPPLY (WELLS)	DHS	SAN MATEO	2	HALF MOON BAY TERRACE (2-22)	22	13
W0604110009	4110009-007	37.669	-122.435	FE		14.08	UG/L	2014-06-09	WATER SUPPLY (WELLS)	DHS	SAN MATEO	2	WESTSIDE (2-35)	22	13
W0604110009	4110009-007	37.669	-122.435	FE		13.73	UG/L	2014-12-04	WATER SUPPLY (WELLS)	DHS	SAN MATEO	2	WESTSIDE (2-35)	22	13
W0604110009	4110009-006	37.669	-122.435	FE	<	0	UG/L	2016-02-16	WATER SUPPLY (WELLS)	DHS	SAN MATEO	2	WESTSIDE (2-35)	22	13
T0609592162	IT-MW92-38	38.0617	-122.527	FE	ND	0	UG/L	2014-11-12	ENVIRONMENTAL MONITORING (WELLS)	EDF	MARIN	2	NOVATO VALLEY (2-30)	10	2
T0600101486	MW-6	37.7988	-122.27	FE	ND	0	UG/L	2014-08-14	ENVIRONMENTAL MONITORING (WELLS)	EDF	ALAMEDA	2	SANTA CLARA VALLEY - EAST BAY PLAIN (2-9.04)	18	9
T0608164698	MW-6	37.5886	-122.363	FE	=	1800	UG/L	2014-03-12	ENVIRONMENTAL MONITORING (WELLS)	EDF	SAN MATEO	2	WESTSIDE (2-35)	22	13
W0604310011	4310011-088	37.35	-121.88	FE	<	0	UG/L	2016-03-03	WATER SUPPLY (WELLS)	DHS	SANTA CLARA	2	SANTA CLARA VALLEY - SANTA CLARA (2-9.02)	27	15
T0608100077	MW-13	37.6868	-122.471	FE	=	65700	UG/L	2015-09-16	ENVIRONMENTAL MONITORING (WELLS)	EDF	SAN MATEO	2	WESTSIDE (2-35)	19	11
T10000003206	WS-2I	38.2497	-122.045	FE	=	1300	UG/L	2015-10-20	ENVIRONMENTAL MONITORING (WELLS)	EDF	SOLANO	2	SUISUN-FAIRFIELD VALLEY (2-3)	11	3
T0601300383	SW-1	37.7766	-121.978	FE	=	233000	UG/L	2015-02-16	ENVIRONMENTAL MONITORING (WELLS)	EDF	CONTRA COSTA	2	SAN RAMON VALLEY (2-7)	16	7
T0601300383	SW-1	37.7766	-121.978	FE	=	51800	UG/L	2015-04-23	ENVIRONMENTAL MONITORING (WELLS)	EDF	CONTRA COSTA	2	SAN RAMON VALLEY (2-7)	16	7
L10006514573	H-5	37.4103	-121.972	FE	ND	0	UG/L	2014-02-27	ENVIRONMENTAL MONITORING (WELLS)	EDF	SANTA CLARA	2	SANTA CLARA VALLEY - SANTA CLARA (2-9.02)	25	10
L10006514573	H-5	37.4103	-121.972	FE	ND	0	UG/L	2014-07-18	ENVIRONMENTAL MONITORING (WELLS)	EDF	SANTA CLARA	2	SANTA CLARA VALLEY - SANTA CLARA (2-9.02)	25	10
L10006514573	H-5	37.4103	-121.972	FE	=	120	UG/L	2016-03-03	ENVIRONMENTAL MONITORING (WELLS)	EDF	SANTA CLARA	2	SANTA CLARA VALLEY - SANTA CLARA (2-9.02)	25	10
W0604310011	4310011-004	37.321	-121.92	FE		140	UG/L	2016-02-25	WATER SUPPLY (WELLS)	DHS	SANTA CLARA	2	SANTA CLARA VALLEY - SANTA CLARA (2-9.02)	28	15
T10000000901	MW2	37.3506	-121.974	FE	=	12	UG/L	2014-09-08	ENVIRONMENTAL MONITORING (WELLS)	EDF	SANTA CLARA	2	SANTA CLARA VALLEY - SANTA CLARA (2-9.02)	25	10
T10000000901	MW2	37.3506	-121.974	FE	=	30	UG/L	2014-11-25	ENVIRONMENTAL MONITORING (WELLS)	EDF	SANTA CLARA	2	SANTA CLARA VALLEY - SANTA CLARA (2-9.02)	25	10
T10000000901	MW2	37.3506	-121.974	FE	=	39.2	UG/L	2015-06-04	ENVIRONMENTAL MONITORING (WELLS)	EDF	SANTA CLARA	2	SANTA CLARA VALLEY - SANTA CLARA (2-9.02)	25	10
T10000000901	MW2	37.3506	-121.974	FE	=	4550	UG/L	2016-02-25	ENVIRONMENTAL MONITORING (WELLS)	EDF	SANTA CLARA	2	SANTA CLARA VALLEY - SANTA CLARA (2-9.02)	25	10
T10000001468	MPMW7-2	37.6275	-122.416	FE	ND	0	UG/L	2014-01-14	ENVIRONMENTAL MONITORING (WELLS)	EDF	SAN MATEO	2	WESTSIDE (2-35)	22	13
L10009353957	CW-7	37.9497	-122.38	FE	=	4970	UG/L	2014-02-19	ENVIRONMENTAL MONITORING (WELLS)	EDF	CONTRA COSTA	2	NO BASIN FOUND	15	9
L10009353957	CW-7	37.9497	-122.38	FE	=	1530	UG/L	2015-12-02	ENVIRONMENTAL MONITORING (WELLS)	EDF	CONTRA COSTA	2	NO BASIN FOUND	15	9
L10006224883	GW-2	37.8701	-122.321	FE	=	3000	UG/L	2016-07-18	ENVIRONMENTAL MONITORING (WELLS)	EDF	ALAMEDA	2	SANTA CLARA VALLEY - EAST BAY PLAIN (2-9.04)	15	9
T0609700943	MW-16	38.2493	-122.626	FE	=	650	UG/L	2014-06-18	ENVIRONMENTAL MONITORING (WELLS)	EDF	SONOMA	2	PETALUMA VALLEY (2-1)	10	3
SL1821Y617	MW-15	37.4337	-122.1	FE	=	620	UG/L	2014-12-18	ENVIRONMENTAL MONITORING (WELLS)	EDF	SANTA CLARA	2	SANTA CLARA VALLEY - SANTA CLARA (2-9.02)	24	13
T0600101803	EW-2	37.7683	-122.24	FE	=	1000	UG/L	2014-06-19	ENVIRONMENTAL MONITORING (WELLS)	EDF	ALAMEDA	2	SANTA CLARA VALLEY - EAST BAY PLAIN (2-9.04)	18	9
L10009353957	GW-31A	37.9539	-122.374	FE	=	339	UG/L	2015-11-02	ENVIRONMENTAL MONITORING (WELLS)	EDF	CONTRA COSTA	2	SANTA CLARA VALLEY - EAST BAY PLAIN (2-9.04)	15	9
SL18244665	GW-19C	37.9423	-122.372	FE	ND	40.4	UG/L	2014-09-22	ENVIRONMENTAL MONITORING (WELLS)	EDF	CONTRA COSTA	2	SANTA CLARA VALLEY - EAST BAY PLAIN (2-9.04)	15	9
T0600100980	MW-9	37.7663	-122.243	FE	=	38000	UG/L	2015-08-10	ENVIRONMENTAL MONITORING (WELLS)	EDF	ALAMEDA	2	SANTA CLARA VALLEY - EAST BAY PLAIN (2-9.04)	18	9
T0601300383	MW-12	37.7775	-121.977	FE	=	10100	UG/L	2015-07-20	ENVIRONMENTAL MONITORING (WELLS)	EDF	CONTRA COSTA	2	SAN RAMON VALLEY (2-7)	16	7
T0601300383	OW-1	37.7767	-121.978	FE	=	1080	UG/L	2015-03-20	ENVIRONMENTAL MONITORING (WELLS)	EDF	CONTRA COSTA	2	SAN RAMON VALLEY (2-7)	16	7
T0608501548	MW-6C	37.3004	-121.822	FE	=	1000	UG/L	2013-12-19	ENVIRONMENTAL MONITORING (WELLS)	EDF	SANTA CLARA	2	SANTA CLARA VALLEY - SANTA CLARA (2-9.02)	27	15
T0601300383	MW-9	37.7769	-121.978	FE	=	11900	UG/L	2015-07-20	ENVIRONMENTAL MONITORING (WELLS)	EDF	CONTRA COSTA	2	SAN RAMON VALLEY (2-7)	16	7
T0601300383	MW-13	37.7767	-121.978	FE	=	4530	UG/L	2015-06-22	ENVIRONMENTAL MONITORING (WELLS)	EDF	CONTRA COSTA	2	SAN RAMON VALLEY (2-7)	16	7
T10000004547	MW-2A	37.221	-121.977	FE	=	93000	UG/L	2015-04-09	ENVIRONMENTAL MONITORING (WELLS)	EDF	SANTA CLARA	2	SANTA CLARA VALLEY - SANTA CLARA (2-9.02)	28	15
T0601300383	SW-2	37.7766	-121.978	FE	=	69600	UG/L	2015-05-28	ENVIRONMENTAL MONITORING (WELLS)	EDF	CONTRA COSTA	2	SAN RAMON VALLEY (2-7)	16	7
T0600101016	MW-7	37.6157	-122.082	FE	=	760	UG/L	2015-10-02	ENVIRONMENTAL MONITORING (WELLS)	EDF	ALAMEDA	2	SANTA CLARA VALLEY - EAST BAY PLAIN (2-9.04)	20	10
SL18244665	GW-7A	37.9441	-122.367	FE	ND	0	UG/L	2015-08-27	ENVIRONMENTAL MONITORING (WELLS)	EDF	CONTRA COSTA	2	SANTA CLARA VALLEY - EAST BAY PLAIN (2-9.04)	15	9
T0608100661	MW-6	37.4939	-122.215	FE	ND	0	UG/L	2015-04-01	ENVIRONMENTAL MONITORING (WELLS)	EDF	SAN MATEO	2	SANTA CLARA VALLEY - SAN MATEO PLAIN (2-9.03)	22	13
T0608100661	MW-6	37.4939	-122.215	FE	=	860	UG/L	2014-09-19	ENVIRONMENTAL MONITORING (WELLS)	EDF	SAN MATEO	2	SANTA CLARA VALLEY - SAN MATEO PLAIN (2-9.03)	22	13
T0608100661	MW-6	37.4939	-122.215	FE	=	680	UG/L	2014-12-30	ENVIRONMENTAL MONITORING (WELLS)	EDF	SAN MATEO	2	SANTA CLARA VALLEY - SAN MATEO PLAIN (2-9.03)	22	13
T0608500255	C-4	37.3207	-121.972	FE	=	3700	UG/L	2015-07-28	ENVIRONMENTAL MONITORING (WELLS)	EDF	SANTA CLARA	2	SANTA CLARA VALLEY - SANTA CLARA (2-9.02)	28	15
T0600101516	EW2	37.6934	-122.068	FE	=	3200	UG/L	2015-12-15	ENVIRONMENTAL MONITORING (WELLS)	EDF	ALAMEDA	2	CASTRO VALLEY (2-8)	20	10
T0608100077	MW-12	37.6863	-122.471	FE	=	18000	UG/L	2014-11-07	ENVIRONMENTAL MONITORING (WELLS)	EDF	SAN MATEO	2	WESTSIDE (2-35)	19	11
L10009353957	GW-78A	37.9476	-122.38	FE	ND	185	UG/L	2015-10-21	ENVIRONMENTAL MONITORING (WELLS)	EDF	CONTRA COSTA	2	NO BASIN FOUND	15	9
T10000001468	MPMW7-5	37.6275	-122.416	FE	=	3600	UG/L	2014-10-16	ENVIRONMENTAL MONITORING (WELLS)	EDF	SAN MATEO	2	WESTSIDE (2-35)	22	13
T10000001468	MPMW7-5	37.6275	-122.416	FE	=	6100	UG/L	2015-01-13	ENVIRONMENTAL MONITORING (WELLS)	EDF	SAN MATEO	2	WESTSIDE (2-35)	22	13
T10000001468	MPMW7-5	37.6275	-122.416	FE	=	4500	UG/L	2015-05-07	ENVIRONMENTAL MONITORING (WELLS)	EDF	SAN MATEO	2	WESTSIDE (2-35)	22	13
T10000001468	MPMW7-5	37.6275	-122.416	FE	=	5400	UG/L	2015-07-22	ENVIRONMENTAL MONITORING (WELLS)	EDF	SAN MATEO	2	WESTSIDE (2-35)	22	13
T0600100980	MW-15	37.7661	-122.243	FE	=	46000	UG/L	2015-08-10	ENVIRONMENTAL MONITORING (WELLS)	EDF	ALAMEDA	2	SANTA CLARA VALLEY - EAST BAY PLAIN (2-9.04)	18	9
T0600100980	MW-8	37.7659	-122.243	FE	=	29000	UG/L	2015-08-11	ENVIRONMENTAL MONITORING (WELLS)	EDF	ALAMEDA	2	SANTA CLARA VALLEY - EAST BAY PLAIN (2-9.04)	18	9
W0600110010	0110010-019	37.698	-121.88	FE	<	0	UG/L	2014-06-19	WATER SUPPLY (WELLS)	DHS	ALAMEDA	2	LIVERMORE VALLEY (2-10)	16	7
L10006514573	G-06	37.4145	-121.972	FE	ND	0	UG/L	2015-03-04	ENVIRONMENTAL MONITORING (WELLS)	EDF	SANTA CLARA	2	SANTA CLARA VALLEY - SANTA CLARA (2-9.02)	25	10
SL1821Y617	MW-9	37.4328	-122.099	FE	=	220	UG/L	2014-12-19	ENVIRONMENTAL MONITORING (WELLS)	EDF	SANTA CLARA	2	SANTA CLARA VALLEY - SANTA CLARA (2-9.02)	24	13
T0600101486	MW-5	37.7989	-122.27	FE	=	160	UG/L	2014-08-14	ENVIRONMENTAL MONITORING (WELLS)	EDF	ALAMEDA	2	SANTA CLARA VALLEY - EAST BAY PLAIN (2-9.04)	18	9
L10009353957	CW-6	37.9514	-122.38	FE	=	4250	UG/L	2015-02-11	ENVIRONMENTAL MONITORING (WELLS)	EDF	CONTRA COSTA	2	NO BASIN FOUND	15	9
W0600110001	0110001-024	37.553	-121.959	FE	<	100	UG/L	2014-08-05	WATER SUPPLY (WELLS)	DHS	ALAMEDA	2	SANTA CLARA VALLEY - NILES CONE (2-9.01)	20	10
W0600110001	0110001-008	37.553	-121.999	FE	<	100	UG/L	2015-07-20	WATER SUPPLY (WELLS)	DHS	ALAMEDA	2	SANTA CLARA VALLEY - NILES CONE (2-9.01)	20	10
W0600110001	0110001-020	37.553	-121.959	FE	<	100	UG/L	2015-07-20	WATER SUPPLY (WELLS)	DHS	ALAMEDA	2	SANTA CLARA VALLEY - NILES CONE (2-9.01)	20	10
T0600101516	OW4	37.6933	-122.068	FE	=	4400	UG/L	2015-12-14	ENVIRONMENTAL MONITORING (WELLS)	EDF	ALAMEDA	2	CASTRO VALLEY (2-8)	20	10
T0608164698	MW-3	37.5886	-122.363	FE	ND	0	UG/L	2013-12-05	ENVIRONMENTAL MONITORING (WELLS)	EDF	SAN MATEO	2	WESTSIDE (2-35)	22	13
T0608100077	MW-3	37.6865	-122.471	FE	=	2300	UG/L	2014-11-07	ENVIRONMENTAL MONITORING (WELLS)	EDF	SAN MATEO	2	WESTSIDE (2-35)	19	11
T0609700943	MW-12	38.2498	-122.625	FE	=	68000	UG/L	2013-12-13	ENVIRONMENTAL MONITORING (WELLS)	EDF	SONOMA	2	PETALUMA VALLEY (2-1)	10	3
T0600101516	OW6	37.6933	-122.068	FE	=	1900	UG/L	2015-12-15	ENVIRONMENTAL MONITORING (WELLS)	EDF	ALAMEDA	2	CASTRO VALLEY (2-8)	20	10
T10000000666	MW-07	37.8923	-122.112	FE	ND	0	UG/L	2014-05-29	ENVIRONMENTAL MONITORING (WELLS)	EDF	CONTRA COSTA	2	NO BASIN FOUND	16	7
T0609592162	IT-GMP-18	38.0638	-122.526	FE	ND	0	UG/L	2014-11-13	ENVIRONMENTAL MONITORING (WELLS)	EDF	MARIN	2	NOVATO VALLEY (2-30)	10	2
T0600100939	MW-10	37.7323	-122.202	FE	=	10000	UG/L	2014-02-05	ENVIRONMENTAL MONITORING (WELLS)	EDF	ALAMEDA	2	SANTA CLARA VALLEY - EAST BAY PLAIN (2-9.04)	18	9
T10000001468	MPMW5-3	37.6279	-122.416	FE	=	42000	UG/L	2014-01-14	ENVIRONMENTAL MONITORING (WELLS)	EDF	SAN MATEO	2	WESTSIDE (2-35)	22	13
T10000001468	MPMW5-3	37.6279	-122.416	FE	=	130000	UG/L	2014-07-09	ENVIRONMENTAL MONITORING (WELLS)	EDF	SAN MATEO	2	WESTSIDE (2-35)	22	13
T10000001468	MPMW5-3	37.6279	-122.416	FE	=	49000	UG/L	2015-07-22	ENVIRONMENTAL MONITORING (WELLS)	EDF	SAN MATEO	2	WESTSIDE (2-35)	22	13
T0601300404	EA-5	37.9536	-122.06	FE	ND	0	UG/L	2016-05-25	ENVIRONMENTAL MONITORING (WELLS)	EDF	CONTRA COSTA	2	YGNACIO VALLEY (2-6)	14	3
T10000003609	CW-9A	37.9541	-122.061	FE	=	630	UG/L	2015-12-16	ENVIRONMENTAL MONITORING (WELLS)	EDF	CONTRA COSTA	2	YGNACIO VALLEY (2-6)	14	3
L10005834311	MW-6	37.7546	-121.661	FE	ND	0	UG/L	2015-11-11	ENVIRONMENTAL MONITORING (WELLS)	EDF	ALAMEDA	2	NO BASIN FOUND	16	7
T0608100661	MW-2	37.4945	-122.215	FE	=	10000	UG/L	2014-03-26	ENVIRONMENTAL MONITORING (WELLS)	EDF	SAN MATEO	2	SANTA CLARA VALLEY - SAN MATEO PLAIN (2-9.03)	22	13
T0608100661	MW-2	37.4945	-122.215	FE	ND	0	UG/L	2015-10-23	ENVIRONMENTAL MONITORING (WELLS)	EDF	SAN MATEO	2	SANTA CLARA VALLEY - SAN MATEO PLAIN (2-9.03)	22	13
T0600100939	IW-5	37.7325	-122.201	FE	=	9000	UG/L	2014-08-29	ENVIRONMENTAL MONITORING (WELLS)	EDF	ALAMEDA	2	SANTA CLARA VALLEY - EAST BAY PLAIN (2-9.04)	18	9
T0601300383	SW-3	37.7767	-121.978	FE	=	88400	UG/L	2015-04-23	ENVIRONMENTAL MONITORING (WELLS)	EDF	CONTRA COSTA	2	SAN RAMON VALLEY (2-7)	16	7
T0600101016	MW-6	37.6153	-122.082	FE	=	6800	UG/L	2014-09-11	ENVIRONMENTAL MONITORING (WELLS)	EDF	ALAMEDA	2	SANTA CLARA VALLEY - EAST BAY PLAIN (2-9.04)	20	10
SL0600106796	MW-22A	37.5268	-122.033	FE	=	25000	UG/L	2016-05-09	ENVIRONMENTAL MONITORING (WELLS)	EDF	ALAMEDA	2	SANTA CLARA VALLEY - NILES CONE (2-9.01)	25	10
T0601300383	ESE-3	37.7766	-121.978	FE	=	10900	UG/L	2015-07-21	ENVIRONMENTAL MONITORING (WELLS)	EDF	CONTRA COSTA	2	SAN RAMON VALLEY (2-7)	16	7
T0600100980	MW-7R	37.7661	-122.243	FE	=	24000	UG/L	2015-11-10	ENVIRONMENTAL MONITORING (WELLS)	EDF	ALAMEDA	2	SANTA CLARA VALLEY - EAST BAY PLAIN (2-9.04)	18	9
T10000000666	MW-06	37.8921	-122.112	FE	ND	0	UG/L	2014-05-29	ENVIRONMENTAL MONITORING (WELLS)	EDF	CONTRA COSTA	2	NO BASIN FOUND	16	7
SL0600106796	MW-23A	37.5266	-122.034	FE	=	3700	UG/L	2016-05-09	ENVIRONMENTAL MONITORING (WELLS)	EDF	ALAMEDA	2	SANTA CLARA VALLEY - NILES CONE (2-9.01)	25	10
W0604910013	4910013-001	38.335	-122.474	FE	<	0	UG/L	2014-04-07	WATER SUPPLY (WELLS)	DHS	SONOMA	2	NO BASIN FOUND	4	2
W0604310011	4310011-122	37.292	-121.959	FE		230	UG/L	2014-02-10	WATER SUPPLY (WELLS)	DHS	SANTA CLARA	2	SANTA CLARA VALLEY - SANTA CLARA (2-9.02)	28	15
W0604310011	4310011-122	37.292	-121.959	FE		110	UG/L	2014-08-21	WATER SUPPLY (WELLS)	DHS	SANTA CLARA	2	SANTA CLARA VALLEY - SANTA CLARA (2-9.02)	28	15
W0604310020	4310020-012	37.205	-121.721	FE		1300	UG/L	2014-10-21	WATER SUPPLY (WELLS)	DHS	SANTA CLARA	2	SANTA CLARA VALLEY - SANTA CLARA (2-9.02)	29	17
W0604310012	4310012-034	37.35	-121.92	FE	<	100	UG/L	2014-08-26	WATER SUPPLY (WELLS)	DHS	SANTA CLARA	2	SANTA CLARA VALLEY - SANTA CLARA (2-9.02)	25	10
W0604110020	4110020-006	37.466	-122.157	FE	<	0	UG/L	2014-06-17	WATER SUPPLY (WELLS)	DHS	SAN MATEO	2	SANTA CLARA VALLEY - SAN MATEO PLAIN (2-9.03)	24	13
W0604110020	4110020-006	37.466	-122.157	FE		340	UG/L	2014-07-15	WATER SUPPLY (WELLS)	DHS	SAN MATEO	2	SANTA CLARA VALLEY - SAN MATEO PLAIN (2-9.03)	24	13
W0604110019	4110019-002	37.466	-122.157	FE	<	0	UG/L	2015-11-24	WATER SUPPLY (WELLS)	DHS	SAN MATEO	2	SANTA CLARA VALLEY - SAN MATEO PLAIN (2-9.03)	24	13
W0604110020	4110020-006	37.466	-122.157	FE		1200	UG/L	2016-01-19	WATER SUPPLY (WELLS)	DHS	SAN MATEO	2	SANTA CLARA VALLEY - SAN MATEO PLAIN (2-9.03)	24	13
W0604110020	4110020-006	37.466	-122.157	FE		720	UG/L	2016-06-21	WATER SUPPLY (WELLS)	DHS	SAN MATEO	2	SANTA CLARA VALLEY - SAN MATEO PLAIN (2-9.03)	24	13
W0604300721	4300721-002	37.118	-121.959	FE		800	UG/L	2014-05-23	WATER SUPPLY (WELLS)	DHS	SANTA CLARA	2	NO BASIN FOUND	28	15
W0604900843	4900843-002	38.335	-122.435	FE	<	100	UG/L	2014-09-29	WATER SUPPLY (WELLS)	DHS	SONOMA	2	NO BASIN FOUND	4	3
W0604310020	4310020-002	37.292	-121.84	FE	<	100	UG/L	2014-03-27	WATER SUPPLY (WELLS)	DHS	SANTA CLARA	2	SANTA CLARA VALLEY - SANTA CLARA (2-9.02)	27	15
W0604900901	4900901-008	38.567	-122.514	FE		340	UG/L	2015-06-22	WATER SUPPLY (WELLS)	DHS	NAPA	2	NAPA-SONOMA VALLEY - NAPA VALLEY (2-2.01)	4	3
W0604100555	4100555-001	37.263	-122.197	FE	<	100	UG/L	2014-08-14	WATER SUPPLY (WELLS)	DHS	SAN MATEO	2	NO BASIN FOUND	24	13
W0602110006	2110006-004	38.075	-122.791	FE		130	UG/L	2015-11-17	WATER SUPPLY (WELLS)	DHS	MARIN	2	NO BASIN FOUND	10	2
W0604410016	4410016-004	37.234	-122.078	FE		730	UG/L	2014-09-04	WATER SUPPLY (WELLS)	DHS	SANTA CLARA	2	NO BASIN FOUND	28	15
W0604410016	4410016-004	37.234	-122.078	FE		310	UG/L	2015-06-16	WATER SUPPLY (WELLS)	DHS	SANTA CLARA	2	NO BASIN FOUND	28	15
W0604800574	4800574-001	38.104	-121.84	FE	<	0	UG/L	2014-08-04	WATER SUPPLY (WELLS)	DHS	SOLANO	2	SUISUN-FAIRFIELD VALLEY (2-3)	11	3
SL0608125065	MW-87	37.417	-122.207	FE	=	120	UG/L	2014-08-20	ENVIRONMENTAL MONITORING (WELLS)	EDF	SAN MATEO	2	SANTA CLARA VALLEY - SAN MATEO PLAIN (2-9.03)	24	13
SL0608125065	MW-87	37.417	-122.207	FE	=	40	UG/L	2015-08-18	ENVIRONMENTAL MONITORING (WELLS)	EDF	SAN MATEO	2	SANTA CLARA VALLEY - SAN MATEO PLAIN (2-9.03)	24	13
T0600101016	MW-8	37.6154	-122.082	FE	=	6700	UG/L	2014-03-31	ENVIRONMENTAL MONITORING (WELLS)	EDF	ALAMEDA	2	SANTA CLARA VALLEY - EAST BAY PLAIN (2-9.04)	20	10
T0600101016	MW-8	37.6154	-122.082	FE	ND	0	UG/L	2014-03-31	ENVIRONMENTAL MONITORING (WELLS)	EDF	ALAMEDA	2	SANTA CLARA VALLEY - EAST BAY PLAIN (2-9.04)	20	10
T0609592162	MW-4A	38.0563	-122.528	FE	=	43000	UG/L	2014-11-14	ENVIRONMENTAL MONITORING (WELLS)	EDF	MARIN	2	NOVATO VALLEY (2-30)	10	2
SL18244665	GW-8A	37.9425	-122.368	FE	ND	0	UG/L	2014-09-18	ENVIRONMENTAL MONITORING (WELLS)	EDF	CONTRA COSTA	2	SANTA CLARA VALLEY - EAST BAY PLAIN (2-9.04)	15	9
L10006514573	G-10	37.4111	-121.972	FE	ND	0	UG/L	2016-03-03	ENVIRONMENTAL MONITORING (WELLS)	EDF	SANTA CLARA	2	SANTA CLARA VALLEY - SANTA CLARA (2-9.02)	25	10
L10006514573	H-6	37.4114	-121.971	FE	ND	0	UG/L	2015-08-12	ENVIRONMENTAL MONITORING (WELLS)	EDF	SANTA CLARA	2	SANTA CLARA VALLEY - SANTA CLARA (2-9.02)	25	10
L10006514573	H-6	37.4114	-121.971	FE	ND	0	UG/L	2016-08-23	ENVIRONMENTAL MONITORING (WELLS)	EDF	SANTA CLARA	2	SANTA CLARA VALLEY - SANTA CLARA (2-9.02)	25	10
L10009353957	GW-38C	37.9539	-122.376	FE	=	2510	UG/L	2015-01-26	ENVIRONMENTAL MONITORING (WELLS)	EDF	CONTRA COSTA	2	SANTA CLARA VALLEY - EAST BAY PLAIN (2-9.04)	15	9
L10009353957	GW-38C	37.9539	-122.376	FE	=	1940	UG/L	2014-10-22	ENVIRONMENTAL MONITORING (WELLS)	EDF	CONTRA COSTA	2	SANTA CLARA VALLEY - EAST BAY PLAIN (2-9.04)	15	9
L10009353957	GW-38C	37.9539	-122.376	FE	ND	0	UG/L	2015-05-04	ENVIRONMENTAL MONITORING (WELLS)	EDF	CONTRA COSTA	2	SANTA CLARA VALLEY - EAST BAY PLAIN (2-9.04)	15	9
T0600101516	F3	37.6933	-122.068	FE	=	25000	UG/L	2014-10-09	ENVIRONMENTAL MONITORING (WELLS)	EDF	ALAMEDA	2	CASTRO VALLEY (2-8)	20	10
L10009353957	GW-3A-2	37.9514	-122.38	FE	=	439	UG/L	2014-10-07	ENVIRONMENTAL MONITORING (WELLS)	EDF	CONTRA COSTA	2	NO BASIN FOUND	15	9
L10009353957	GW-3A-2	37.9514	-122.38	FE	ND	0	UG/L	2014-10-07	ENVIRONMENTAL MONITORING (WELLS)	EDF	CONTRA COSTA	2	NO BASIN FOUND	15	9
T10000001468	MPMW1-3	37.6273	-122.417	FE	ND	0	UG/L	2014-01-14	ENVIRONMENTAL MONITORING (WELLS)	EDF	SAN MATEO	2	WESTSIDE (2-35)	22	13
T0609700943	MW-7	38.249	-122.626	FE	=	36000	UG/L	2014-06-18	ENVIRONMENTAL MONITORING (WELLS)	EDF	SONOMA	2	PETALUMA VALLEY (2-1)	10	3
T10000003434	MW-3	37.7675	-122.169	FE	ND	0	UG/L	2016-08-05	ENVIRONMENTAL MONITORING (WELLS)	EDF	ALAMEDA	2	NO BASIN FOUND	18	9
T0601300383	ESE-1	37.7766	-121.978	FE	=	31400	UG/L	2015-05-13	ENVIRONMENTAL MONITORING (WELLS)	EDF	CONTRA COSTA	2	SAN RAMON VALLEY (2-7)	16	7
T0600101410	MW-2	37.6794	-121.776	FE	=	2600	UG/L	2014-06-11	ENVIRONMENTAL MONITORING (WELLS)	EDF	ALAMEDA	2	LIVERMORE VALLEY (2-10)	16	7
T0600101410	MW-2	37.6794	-121.776	FE	=	6600	UG/L	2014-08-14	ENVIRONMENTAL MONITORING (WELLS)	EDF	ALAMEDA	2	LIVERMORE VALLEY (2-10)	16	7
T0600101486	MW-8	37.7986	-122.27	FE	=	130	UG/L	2014-02-06	ENVIRONMENTAL MONITORING (WELLS)	EDF	ALAMEDA	2	SANTA CLARA VALLEY - EAST BAY PLAIN (2-9.04)	18	9
T0600101486	MW-8	37.7986	-122.27	FE	ND	0	UG/L	2014-08-14	ENVIRONMENTAL MONITORING (WELLS)	EDF	ALAMEDA	2	SANTA CLARA VALLEY - EAST BAY PLAIN (2-9.04)	18	9
SL1821Y617	MW-10	37.4323	-122.099	FE	=	460	UG/L	2014-12-19	ENVIRONMENTAL MONITORING (WELLS)	EDF	SANTA CLARA	2	SANTA CLARA VALLEY - SANTA CLARA (2-9.02)	24	13
SL0600100443	MW-9	37.5507	-121.857	FE	=	86.8	UG/L	2014-03-20	ENVIRONMENTAL MONITORING (WELLS)	EDF	ALAMEDA	2	NO BASIN FOUND	20	7
SL20210828	510A	38.0229	-121.848	FE	ND	0	UG/L	2015-04-15	ENVIRONMENTAL MONITORING (WELLS)	EDF	CONTRA COSTA	2	PITTSBURG PLAIN (2-4)	11	7
T0608553115	MW-6A	37.3634	-121.828	FE	ND	0	UG/L	2016-06-10	ENVIRONMENTAL MONITORING (WELLS)	EDF	SANTA CLARA	2	SANTA CLARA VALLEY - SANTA CLARA (2-9.02)	27	15
T0608100661	MW-4	37.4938	-122.215	FE	=	1200	UG/L	2014-09-19	ENVIRONMENTAL MONITORING (WELLS)	EDF	SAN MATEO	2	SANTA CLARA VALLEY - SAN MATEO PLAIN (2-9.03)	22	13
T0608100661	MW-4	37.4938	-122.215	FE	=	11000	UG/L	2014-12-30	ENVIRONMENTAL MONITORING (WELLS)	EDF	SAN MATEO	2	SANTA CLARA VALLEY - SAN MATEO PLAIN (2-9.03)	22	13
T0608100147	C-13	37.6289	-122.417	FE	=	2300	UG/L	2014-04-29	ENVIRONMENTAL MONITORING (WELLS)	EDF	SAN MATEO	2	WESTSIDE (2-35)	22	13
T0608100147	C-13	37.6289	-122.417	FE	=	2300	UG/L	2015-08-28	ENVIRONMENTAL MONITORING (WELLS)	EDF	SAN MATEO	2	WESTSIDE (2-35)	22	13
T0608100147	C-13	37.6289	-122.417	FE	=	57000	UG/L	2015-07-14	ENVIRONMENTAL MONITORING (WELLS)	EDF	SAN MATEO	2	WESTSIDE (2-35)	22	13
T0608100147	C-13	37.6289	-122.417	FE	=	730	UG/L	2015-07-22	ENVIRONMENTAL MONITORING (WELLS)	EDF	SAN MATEO	2	WESTSIDE (2-35)	22	13
L10009353957	GW-3C-1	37.9513	-122.38	FE	ND	0	UG/L	2014-07-16	ENVIRONMENTAL MONITORING (WELLS)	EDF	CONTRA COSTA	2	NO BASIN FOUND	15	9
L10009353957	GW-3C-1	37.9513	-122.38	FE	ND	0	UG/L	2015-01-29	ENVIRONMENTAL MONITORING (WELLS)	EDF	CONTRA COSTA	2	NO BASIN FOUND	15	9
L10009353957	GW-3C-1	37.9513	-122.38	FE	ND	39.5	UG/L	2015-05-07	ENVIRONMENTAL MONITORING (WELLS)	EDF	CONTRA COSTA	2	NO BASIN FOUND	15	9
T0600101866	MW-2	37.8078	-122.314	FE	ND	0	UG/L	2013-12-12	ENVIRONMENTAL MONITORING (WELLS)	EDF	ALAMEDA	2	SANTA CLARA VALLEY - EAST BAY PLAIN (2-9.04)	18	9
T0600101410	DW-2	37.6796	-121.776	FE	=	990	UG/L	2014-01-22	ENVIRONMENTAL MONITORING (WELLS)	EDF	ALAMEDA	2	LIVERMORE VALLEY (2-10)	16	7
T0600101410	DW-2	37.6796	-121.776	FE	=	690	UG/L	2014-11-13	ENVIRONMENTAL MONITORING (WELLS)	EDF	ALAMEDA	2	LIVERMORE VALLEY (2-10)	16	7
L10006514573	G-15	37.4043	-121.972	FE	ND	0	UG/L	2014-07-14	ENVIRONMENTAL MONITORING (WELLS)	EDF	SANTA CLARA	2	SANTA CLARA VALLEY - SANTA CLARA (2-9.02)	25	10
L10006514573	G-15	37.4043	-121.972	FE	ND	0	UG/L	2016-09-29	ENVIRONMENTAL MONITORING (WELLS)	EDF	SANTA CLARA	2	SANTA CLARA VALLEY - SANTA CLARA (2-9.02)	25	10
L10006514573	G-15	37.4043	-121.972	FE	ND	0	UG/L	2016-03-07	ENVIRONMENTAL MONITORING (WELLS)	EDF	SANTA CLARA	2	SANTA CLARA VALLEY - SANTA CLARA (2-9.02)	25	10
T0600101410	IP-8	37.6792	-121.776	FE	ND	0	UG/L	2014-01-22	ENVIRONMENTAL MONITORING (WELLS)	EDF	ALAMEDA	2	LIVERMORE VALLEY (2-10)	16	7
T0609700788	MW-17D	38.2357	-122.461	FE	=	5900	UG/L	2014-03-21	ENVIRONMENTAL MONITORING (WELLS)	EDF	SONOMA	2	NAPA-SONOMA VALLEY - SONOMA VALLEY (2-2.02)	10	3
T0601300335	MW-3	37.9757	-122.066	FE	=	1300	UG/L	2014-06-09	ENVIRONMENTAL MONITORING (WELLS)	EDF	CONTRA COSTA	2	YGNACIO VALLEY (2-6)	14	3
SL20210828	507C	38.0246	-121.847	FE	=	731	UG/L	2015-04-17	ENVIRONMENTAL MONITORING (WELLS)	EDF	CONTRA COSTA	2	PITTSBURG PLAIN (2-4)	11	7
SL0608125065	MW-82	37.4171	-122.206	FE	ND	0	UG/L	2015-09-03	ENVIRONMENTAL MONITORING (WELLS)	EDF	SAN MATEO	2	SANTA CLARA VALLEY - SAN MATEO PLAIN (2-9.03)	24	13
T0600100980	MW-13	37.766	-122.243	FE	=	29000	UG/L	2015-08-10	ENVIRONMENTAL MONITORING (WELLS)	EDF	ALAMEDA	2	SANTA CLARA VALLEY - EAST BAY PLAIN (2-9.04)	18	9
SL18244665	GW-20A	37.9422	-122.371	FE	=	1860	UG/L	2015-09-16	ENVIRONMENTAL MONITORING (WELLS)	EDF	CONTRA COSTA	2	SANTA CLARA VALLEY - EAST BAY PLAIN (2-9.04)	15	9
T0608500710	MW-26	37.3483	-121.892	FE	ND	0	UG/L	2015-09-15	ENVIRONMENTAL MONITORING (WELLS)	EDF	SANTA CLARA	2	SANTA CLARA VALLEY - SANTA CLARA (2-9.02)	27	15
SL0600106796	MW-24A	37.5267	-122.034	FE	ND	0	UG/L	2016-05-09	ENVIRONMENTAL MONITORING (WELLS)	EDF	ALAMEDA	2	SANTA CLARA VALLEY - NILES CONE (2-9.01)	25	10
T0609700788	MW-17S	38.2357	-122.461	FE	=	2200	UG/L	2014-03-21	ENVIRONMENTAL MONITORING (WELLS)	EDF	SONOMA	2	NAPA-SONOMA VALLEY - SONOMA VALLEY (2-2.02)	10	3
T0608164698	S-1	37.5886	-122.363	FE	=	10000	UG/L	2013-12-06	ENVIRONMENTAL MONITORING (WELLS)	EDF	SAN MATEO	2	WESTSIDE (2-35)	22	13
T0608164698	S-1	37.5886	-122.363	FE	=	27000	UG/L	2013-12-06	ENVIRONMENTAL MONITORING (WELLS)	EDF	SAN MATEO	2	WESTSIDE (2-35)	22	13
T10000001468	MPMW4-4	37.6275	-122.416	FE	ND	0	UG/L	2014-04-17	ENVIRONMENTAL MONITORING (WELLS)	EDF	SAN MATEO	2	WESTSIDE (2-35)	22	13
T10000001468	MPMW4-4	37.6275	-122.416	FE	ND	0	UG/L	2014-10-15	ENVIRONMENTAL MONITORING (WELLS)	EDF	SAN MATEO	2	WESTSIDE (2-35)	22	13
T10000001468	MPMW4-4	37.6275	-122.416	FE	ND	0	UG/L	2015-05-07	ENVIRONMENTAL MONITORING (WELLS)	EDF	SAN MATEO	2	WESTSIDE (2-35)	22	13
T10000001468	MPMW4-4	37.6275	-122.416	FE	ND	0	UG/L	2015-10-20	ENVIRONMENTAL MONITORING (WELLS)	EDF	SAN MATEO	2	WESTSIDE (2-35)	22	13
T0608500710	MW-7	37.3481	-121.892	FE	ND	0	UG/L	2015-12-02	ENVIRONMENTAL MONITORING (WELLS)	EDF	SANTA CLARA	2	SANTA CLARA VALLEY - SANTA CLARA (2-9.02)	27	15
T0600100980	MW-14	37.766	-122.243	FE	=	7000	UG/L	2015-11-11	ENVIRONMENTAL MONITORING (WELLS)	EDF	ALAMEDA	2	SANTA CLARA VALLEY - EAST BAY PLAIN (2-9.04)	18	9
SL1821Y617	MW-4	37.4329	-122.1	FE	ND	0	UG/L	2014-12-18	ENVIRONMENTAL MONITORING (WELLS)	EDF	SANTA CLARA	2	SANTA CLARA VALLEY - SANTA CLARA (2-9.02)	24	13
T0608501140	MW-10	37.3488	-121.895	FE	ND	0	UG/L	2014-09-24	ENVIRONMENTAL MONITORING (WELLS)	EDF	SANTA CLARA	2	SANTA CLARA VALLEY - SANTA CLARA (2-9.02)	27	15
T0608500255	C-1	37.3205	-121.972	FE	=	440	UG/L	2016-04-27	ENVIRONMENTAL MONITORING (WELLS)	EDF	SANTA CLARA	2	SANTA CLARA VALLEY - SANTA CLARA (2-9.02)	28	15
T0600101516	OW3	37.6934	-122.068	FE	=	1500	UG/L	2015-01-28	ENVIRONMENTAL MONITORING (WELLS)	EDF	ALAMEDA	2	CASTRO VALLEY (2-8)	20	10
SL0608125065	MW-95	37.4158	-122.219	FE	ND	0	UG/L	2016-02-19	ENVIRONMENTAL MONITORING (WELLS)	EDF	SAN MATEO	2	NO BASIN FOUND	24	13
L10009353957	GW-61C-2	37.9467	-122.365	FE	ND	38.9	UG/L	2014-10-29	ENVIRONMENTAL MONITORING (WELLS)	EDF	CONTRA COSTA	2	SANTA CLARA VALLEY - EAST BAY PLAIN (2-9.04)	15	9
L10009353957	GW-61C-2	37.9467	-122.365	FE	ND	0	UG/L	2015-02-04	ENVIRONMENTAL MONITORING (WELLS)	EDF	CONTRA COSTA	2	SANTA CLARA VALLEY - EAST BAY PLAIN (2-9.04)	15	9
L10009353957	GW-61C-2	37.9467	-122.365	FE	ND	0	UG/L	2015-05-12	ENVIRONMENTAL MONITORING (WELLS)	EDF	CONTRA COSTA	2	SANTA CLARA VALLEY - EAST BAY PLAIN (2-9.04)	15	9
T10000001468	MPMW6-5	37.6278	-122.416	FE	=	2300	UG/L	2015-05-06	ENVIRONMENTAL MONITORING (WELLS)	EDF	SAN MATEO	2	WESTSIDE (2-35)	22	13
T10000000901	MW11	37.3508	-121.975	FE	=	93.1	UG/L	2016-02-25	ENVIRONMENTAL MONITORING (WELLS)	EDF	SANTA CLARA	2	SANTA CLARA VALLEY - SANTA CLARA (2-9.02)	25	10
T0609592161	MW-M23	38.0605	-122.527	FE	=	370	UG/L	2014-11-14	ENVIRONMENTAL MONITORING (WELLS)	EDF	MARIN	2	NOVATO VALLEY (2-30)	10	2
T0608100147	C-12	37.6289	-122.417	FE	=	10000	UG/L	2015-04-21	ENVIRONMENTAL MONITORING (WELLS)	EDF	SAN MATEO	2	WESTSIDE (2-35)	22	13
T0600100980	EW-15	37.7661	-122.243	FE	=	21000	UG/L	2014-06-25	ENVIRONMENTAL MONITORING (WELLS)	EDF	ALAMEDA	2	SANTA CLARA VALLEY - EAST BAY PLAIN (2-9.04)	18	9
T0600100980	MW-16	37.766	-122.243	FE	=	2500	UG/L	2015-08-10	ENVIRONMENTAL MONITORING (WELLS)	EDF	ALAMEDA	2	SANTA CLARA VALLEY - EAST BAY PLAIN (2-9.04)	18	9
T0600101483	RW-1	37.527	-122.006	FE	=	2210	UG/L	2016-03-17	ENVIRONMENTAL MONITORING (WELLS)	EDF	ALAMEDA	2	SANTA CLARA VALLEY - NILES CONE (2-9.01)	25	10
T0600101410	MW-6	37.6795	-121.776	FE	=	1400	UG/L	2014-06-10	ENVIRONMENTAL MONITORING (WELLS)	EDF	ALAMEDA	2	LIVERMORE VALLEY (2-10)	16	7
T0608100147	C-4	37.6288	-122.417	FE	=	5300	UG/L	2014-03-13	ENVIRONMENTAL MONITORING (WELLS)	EDF	SAN MATEO	2	WESTSIDE (2-35)	22	13
T10000000901	MW4	37.3518	-121.974	FE	=	3.51	UG/L	2014-05-28	ENVIRONMENTAL MONITORING (WELLS)	EDF	SANTA CLARA	2	SANTA CLARA VALLEY - SANTA CLARA (2-9.02)	25	10
T10000000901	MW4	37.3518	-121.974	FE	=	9300	UG/L	2013-12-30	ENVIRONMENTAL MONITORING (WELLS)	EDF	SANTA CLARA	2	SANTA CLARA VALLEY - SANTA CLARA (2-9.02)	25	10
T10000000901	MW4	37.3518	-121.974	FE	=	257	UG/L	2015-02-24	ENVIRONMENTAL MONITORING (WELLS)	EDF	SANTA CLARA	2	SANTA CLARA VALLEY - SANTA CLARA (2-9.02)	25	10
T10000002937	MW-1	37.2217	-121.979	FE	=	7460	UG/L	2015-08-03	ENVIRONMENTAL MONITORING (WELLS)	EDF	SANTA CLARA	2	SANTA CLARA VALLEY - SANTA CLARA (2-9.02)	28	15
SL1821Y617	MW-14	37.4333	-122.099	FE	=	160	UG/L	2014-12-18	ENVIRONMENTAL MONITORING (WELLS)	EDF	SANTA CLARA	2	SANTA CLARA VALLEY - SANTA CLARA (2-9.02)	24	13
SL18244665	GW-6C-1	37.9445	-122.374	FE	ND	137	UG/L	2014-10-02	ENVIRONMENTAL MONITORING (WELLS)	EDF	CONTRA COSTA	2	SANTA CLARA VALLEY - EAST BAY PLAIN (2-9.04)	15	9
L10006514573	G-16R	37.4097	-121.968	FE	=	66	UG/L	2016-08-24	ENVIRONMENTAL MONITORING (WELLS)	EDF	SANTA CLARA	2	SANTA CLARA VALLEY - SANTA CLARA (2-9.02)	25	10
L10006514573	G-21	37.4174	-121.969	FE	ND	0	UG/L	2015-03-05	ENVIRONMENTAL MONITORING (WELLS)	EDF	SANTA CLARA	2	SANTA CLARA VALLEY - SANTA CLARA (2-9.02)	25	10
W0604310011	4310011-011	37.263	-121.88	FE		260	UG/L	2014-05-20	WATER SUPPLY (WELLS)	DHS	SANTA CLARA	2	SANTA CLARA VALLEY - SANTA CLARA (2-9.02)	28	15
W0602800625	2800625-005	38.567	-122.474	FE	<	100	UG/L	2014-09-23	WATER SUPPLY (WELLS)	DHS	NAPA	2	NO BASIN FOUND	4	3
W0604110020	4110020-003	37.466	-122.157	FE	<	0	UG/L	2014-05-19	WATER SUPPLY (WELLS)	DHS	SAN MATEO	2	SANTA CLARA VALLEY - SAN MATEO PLAIN (2-9.03)	24	13
W0602800625	2800625-005	38.567	-122.474	FE	<	100	UG/L	2015-06-23	WATER SUPPLY (WELLS)	DHS	NAPA	2	NO BASIN FOUND	4	3
W0602800625	2800625-003	38.538	-122.474	FE	<	100	UG/L	2014-09-23	WATER SUPPLY (WELLS)	DHS	NAPA	2	NO BASIN FOUND	4	3
W0604910013	4910013-002	38.306	-122.474	FE	<	0	UG/L	2014-02-12	WATER SUPPLY (WELLS)	DHS	SONOMA	2	NO BASIN FOUND	4	2
W0602810004	2810004-007	38.509	-122.435	FE		240	UG/L	2014-10-28	WATER SUPPLY (WELLS)	DHS	NAPA	2	NO BASIN FOUND	4	3
W0604310012	4310012-015	37.35	-121.999	FE	<	100	UG/L	2015-08-19	WATER SUPPLY (WELLS)	DHS	SANTA CLARA	2	SANTA CLARA VALLEY - SANTA CLARA (2-9.02)	25	10
W0604310011	4310011-127	37.321	-121.959	FE		220	UG/L	2014-10-14	WATER SUPPLY (WELLS)	DHS	SANTA CLARA	2	SANTA CLARA VALLEY - SANTA CLARA (2-9.02)	28	15
W0600110001	0110001-047	37.553	-122.038	FE	<	100	UG/L	2016-07-19	WATER SUPPLY (WELLS)	DHS	ALAMEDA	2	SANTA CLARA VALLEY - NILES CONE (2-9.01)	25	10
W0604310011	4310011-033	37.321	-121.88	FE	<	100	UG/L	2014-04-03	WATER SUPPLY (WELLS)	DHS	SANTA CLARA	2	SANTA CLARA VALLEY - SANTA CLARA (2-9.02)	27	15
W0602110006	2110006-002	38.075	-122.791	FE	<	0	UG/L	2015-03-24	WATER SUPPLY (WELLS)	DHS	MARIN	2	NO BASIN FOUND	10	2
W0602110006	2110006-002	38.075	-122.791	FE		0	UG/L	2015-09-22	WATER SUPPLY (WELLS)	DHS	MARIN	2	NO BASIN FOUND	10	2
W0600110010	0110010-011	37.669	-121.88	FE	<	0	UG/L	2014-08-11	WATER SUPPLY (WELLS)	DHS	ALAMEDA	2	LIVERMORE VALLEY (2-10)	16	7
W0602110008	2110008-004	38.248	-122.95	FE		1900	UG/L	2014-04-23	WATER SUPPLY (WELLS)	DHS	MARIN	2	SAND POINT AREA (2-27)	10	2
W0604310011	4310011-090	37.35	-121.88	FE		370	UG/L	2015-09-24	WATER SUPPLY (WELLS)	DHS	SANTA CLARA	2	SANTA CLARA VALLEY - SANTA CLARA (2-9.02)	27	15
W0602110007	2110007-002	38.248	-122.95	FE		2600	UG/L	2015-06-04	WATER SUPPLY (WELLS)	DHS	MARIN	2	WILSON GROVE FORMATION HIGHLANDS (1-59)	10	2
W0602110007	2110007-001	38.248	-122.95	FE		3.147	UG/L	2014-10-21	WATER SUPPLY (WELLS)	DHS	MARIN	2	NO BASIN FOUND	10	2
W0602110007	2110007-001	38.248	-122.95	FE		6.799	UG/L	2014-05-12	WATER SUPPLY (WELLS)	DHS	MARIN	2	NO BASIN FOUND	10	2
W0604310011	4310011-027	37.321	-121.92	FE		160	UG/L	2016-06-14	WATER SUPPLY (WELLS)	DHS	SANTA CLARA	2	SANTA CLARA VALLEY - SANTA CLARA (2-9.02)	28	15
W0602110007	2110007-001	38.248	-122.95	FE		5.251	UG/L	2015-03-17	WATER SUPPLY (WELLS)	DHS	MARIN	2	NO BASIN FOUND	10	2
W0602110007	2110007-001	38.248	-122.95	FE	<	0	UG/L	2015-06-04	WATER SUPPLY (WELLS)	DHS	MARIN	2	NO BASIN FOUND	10	2
W0602110007	2110007-001	38.248	-122.95	FE		1.595	UG/L	2015-08-10	WATER SUPPLY (WELLS)	DHS	MARIN	2	NO BASIN FOUND	10	2
W0602110007	2110007-001	38.248	-122.95	FE	<	0	UG/L	2015-12-15	WATER SUPPLY (WELLS)	DHS	MARIN	2	NO BASIN FOUND	10	2
W0604310011	4310011-156	37.321	-121.88	FE		350	UG/L	2015-03-05	WATER SUPPLY (WELLS)	DHS	SANTA CLARA	2	SANTA CLARA VALLEY - SANTA CLARA (2-9.02)	27	15
W0604310011	4310011-156	37.321	-121.88	FE		100	UG/L	2016-03-22	WATER SUPPLY (WELLS)	DHS	SANTA CLARA	2	SANTA CLARA VALLEY - SANTA CLARA (2-9.02)	27	15
W0602800023	2800023-001	38.48	-122.395	FE		170	UG/L	2014-10-09	WATER SUPPLY (WELLS)	DHS	NAPA	2	NO BASIN FOUND	4	3
W0604310011	4310011-034	37.321	-121.88	FE	<	0	UG/L	2016-02-22	WATER SUPPLY (WELLS)	DHS	SANTA CLARA	2	SANTA CLARA VALLEY - SANTA CLARA (2-9.02)	27	15
W0604910012	4910012-023	38.306	-122.474	FE	<	0	UG/L	2015-05-13	WATER SUPPLY (WELLS)	DHS	SONOMA	2	NO BASIN FOUND	10	3
W0604910006	4910006-057	38.248	-122.633	FE	<	100	UG/L	2015-02-10	WATER SUPPLY (WELLS)	DHS	SONOMA	2	PETALUMA VALLEY (2-1)	10	3
T0600101476	MW-6	37.7365	-122.198	FE	=	2000	UG/L	2014-03-04	ENVIRONMENTAL MONITORING (WELLS)	EDF	ALAMEDA	2	SANTA CLARA VALLEY - EAST BAY PLAIN (2-9.04)	18	9
T0609592162	970-MW4	38.0565	-122.528	FE	=	24000	UG/L	2014-11-14	ENVIRONMENTAL MONITORING (WELLS)	EDF	MARIN	2	NOVATO VALLEY (2-30)	10	2
W0604310011	4310011-029	37.321	-121.92	FE		110	UG/L	2016-04-19	WATER SUPPLY (WELLS)	DHS	SANTA CLARA	2	SANTA CLARA VALLEY - SANTA CLARA (2-9.02)	28	15
T0608501140	EW-5	37.349	-121.895	FE	=	5300	UG/L	2014-09-25	ENVIRONMENTAL MONITORING (WELLS)	EDF	SANTA CLARA	2	SANTA CLARA VALLEY - SANTA CLARA (2-9.02)	27	15
T0600101410	DW-8	37.6792	-121.776	FE	=	3800	UG/L	2014-08-14	ENVIRONMENTAL MONITORING (WELLS)	EDF	ALAMEDA	2	LIVERMORE VALLEY (2-10)	16	7
T0600101410	DW-8	37.6792	-121.776	FE	=	3000	UG/L	2015-01-21	ENVIRONMENTAL MONITORING (WELLS)	EDF	ALAMEDA	2	LIVERMORE VALLEY (2-10)	16	7
T0601300383	ESE-5	37.7766	-121.978	FE	=	11600	UG/L	2015-05-13	ENVIRONMENTAL MONITORING (WELLS)	EDF	CONTRA COSTA	2	SAN RAMON VALLEY (2-7)	16	7
T0600101410	DW-1	37.6794	-121.776	FE	ND	0	UG/L	2014-11-12	ENVIRONMENTAL MONITORING (WELLS)	EDF	ALAMEDA	2	LIVERMORE VALLEY (2-10)	16	7
T0600101410	DW-1	37.6794	-121.776	FE	=	140	UG/L	2015-01-20	ENVIRONMENTAL MONITORING (WELLS)	EDF	ALAMEDA	2	LIVERMORE VALLEY (2-10)	16	7
L10006224883	L-7	37.8737	-122.322	FE	=	3500	UG/L	2016-01-21	ENVIRONMENTAL MONITORING (WELLS)	EDF	NO COUNTY FOUND	2	NO BASIN FOUND	15	9
T0608100661	MW-7	37.4947	-122.216	FE	=	8900	UG/L	2013-12-26	ENVIRONMENTAL MONITORING (WELLS)	EDF	SAN MATEO	2	SANTA CLARA VALLEY - SAN MATEO PLAIN (2-9.03)	22	13
T0600101516	C3	37.6934	-122.068	FE	=	2400	UG/L	2015-12-15	ENVIRONMENTAL MONITORING (WELLS)	EDF	ALAMEDA	2	CASTRO VALLEY (2-8)	20	10
T0600101410	DW-3	37.6796	-121.777	FE	ND	0	UG/L	2014-06-11	ENVIRONMENTAL MONITORING (WELLS)	EDF	ALAMEDA	2	LIVERMORE VALLEY (2-10)	16	7
T10000003609	CW-3B	37.9532	-122.06	FE	=	2000	UG/L	2016-08-29	ENVIRONMENTAL MONITORING (WELLS)	EDF	CONTRA COSTA	2	YGNACIO VALLEY (2-6)	14	3
SL18244665	GW-15A	37.9428	-122.373	FE	=	15100	UG/L	2014-09-16	ENVIRONMENTAL MONITORING (WELLS)	EDF	CONTRA COSTA	2	SANTA CLARA VALLEY - EAST BAY PLAIN (2-9.04)	15	9
T0608500710	MW-32	37.3484	-121.892	FE	ND	0	UG/L	2014-04-30	ENVIRONMENTAL MONITORING (WELLS)	EDF	SANTA CLARA	2	SANTA CLARA VALLEY - SANTA CLARA (2-9.02)	27	15
T0608500710	MW-32	37.3484	-121.892	FE	ND	0	UG/L	2015-12-03	ENVIRONMENTAL MONITORING (WELLS)	EDF	SANTA CLARA	2	SANTA CLARA VALLEY - SANTA CLARA (2-9.02)	27	15
T0608500710	MW-29	37.3486	-121.893	FE	=	130	UG/L	2014-01-22	ENVIRONMENTAL MONITORING (WELLS)	EDF	SANTA CLARA	2	SANTA CLARA VALLEY - SANTA CLARA (2-9.02)	27	15
T0609700943	RW-1	38.2492	-122.626	FE	=	5600	UG/L	2013-12-13	ENVIRONMENTAL MONITORING (WELLS)	EDF	SONOMA	2	PETALUMA VALLEY (2-1)	10	3
T10000001468	MPMW4-5	37.6275	-122.416	FE	ND	0	UG/L	2014-01-14	ENVIRONMENTAL MONITORING (WELLS)	EDF	SAN MATEO	2	WESTSIDE (2-35)	22	13
T10000001468	MPMW4-5	37.6275	-122.416	FE	=	2100	UG/L	2015-07-21	ENVIRONMENTAL MONITORING (WELLS)	EDF	SAN MATEO	2	WESTSIDE (2-35)	22	13
T10000001468	MPMW2-5	37.6275	-122.416	FE	=	25000	UG/L	2015-01-15	ENVIRONMENTAL MONITORING (WELLS)	EDF	SAN MATEO	2	WESTSIDE (2-35)	22	13
L10009353957	GW-38A	37.9539	-122.376	FE	ND	143	UG/L	2014-02-05	ENVIRONMENTAL MONITORING (WELLS)	EDF	CONTRA COSTA	2	SANTA CLARA VALLEY - EAST BAY PLAIN (2-9.04)	15	9
W0602100549	2100549-004	38.248	-122.87	FE	<	0	UG/L	2015-03-13	WATER SUPPLY (WELLS)	DHS	MARIN	2	WILSON GROVE FORMATION HIGHLANDS (1-59)	10	2
W0604310001	4310001-022	37.35	-122.078	FE	<	0	UG/L	2015-03-05	WATER SUPPLY (WELLS)	DHS	SANTA CLARA	2	SANTA CLARA VALLEY - SANTA CLARA (2-9.02)	24	13
T06019741226	MW3	37.823	-122.286	FE	=	950	UG/L	2015-10-06	ENVIRONMENTAL MONITORING (WELLS)	EDF	ALAMEDA	2	SANTA CLARA VALLEY - EAST BAY PLAIN (2-9.04)	18	9
SL18316736	T2S-MW02	38.0301	-122.076	FE	=	120	UG/L	2015-04-07	ENVIRONMENTAL MONITORING (WELLS)	EDF	CONTRA COSTA	2	YGNACIO VALLEY (2-6)	14	7
L10006514573	G-2R	37.4103	-121.967	FE	ND	0	UG/L	2015-08-14	ENVIRONMENTAL MONITORING (WELLS)	EDF	SANTA CLARA	2	SANTA CLARA VALLEY - SANTA CLARA (2-9.02)	25	10
T10000000666	MW-03	37.8923	-122.112	FE	=	218	UG/L	2014-05-29	ENVIRONMENTAL MONITORING (WELLS)	EDF	CONTRA COSTA	2	NO BASIN FOUND	16	7
T10000000666	MW-03	37.8923	-122.112	FE	=	671	UG/L	2014-06-24	ENVIRONMENTAL MONITORING (WELLS)	EDF	CONTRA COSTA	2	NO BASIN FOUND	16	7
T10000001468	MPMW7-4	37.6275	-122.416	FE	=	210	UG/L	2014-01-14	ENVIRONMENTAL MONITORING (WELLS)	EDF	SAN MATEO	2	WESTSIDE (2-35)	22	13
W0600110001	0110001-048	37.553	-122.038	FE	<	100	UG/L	2016-07-19	WATER SUPPLY (WELLS)	DHS	ALAMEDA	2	SANTA CLARA VALLEY - NILES CONE (2-9.01)	25	10
T0608500710	MW-28	37.3486	-121.893	FE	ND	0	UG/L	2015-09-15	ENVIRONMENTAL MONITORING (WELLS)	EDF	SANTA CLARA	2	SANTA CLARA VALLEY - SANTA CLARA (2-9.02)	27	15
T0608164698	MW-5A	37.5888	-122.363	FE	=	4100	UG/L	2013-12-06	ENVIRONMENTAL MONITORING (WELLS)	EDF	SAN MATEO	2	WESTSIDE (2-35)	22	13
T0608500710	EW-1	37.3482	-121.892	FE	ND	0	UG/L	2015-09-15	ENVIRONMENTAL MONITORING (WELLS)	EDF	SANTA CLARA	2	SANTA CLARA VALLEY - SANTA CLARA (2-9.02)	27	15
SL0608125065	MW-84	37.4172	-122.207	FE	=	160	UG/L	2015-08-19	ENVIRONMENTAL MONITORING (WELLS)	EDF	SAN MATEO	2	SANTA CLARA VALLEY - SAN MATEO PLAIN (2-9.03)	24	13
T0608500255	C-11R	37.321	-121.971	FE	=	96800	UG/L	2014-01-31	ENVIRONMENTAL MONITORING (WELLS)	EDF	SANTA CLARA	2	SANTA CLARA VALLEY - SANTA CLARA (2-9.02)	28	15
SL1821Y617	MW-15D	37.4337	-122.1	FE	=	230	UG/L	2014-12-18	ENVIRONMENTAL MONITORING (WELLS)	EDF	SANTA CLARA	2	SANTA CLARA VALLEY - SANTA CLARA (2-9.02)	24	13
T0601300383	MW-8	37.7768	-121.978	FE	=	82000	UG/L	2014-08-21	ENVIRONMENTAL MONITORING (WELLS)	EDF	CONTRA COSTA	2	SAN RAMON VALLEY (2-7)	16	7
SL1823K1135	RW-1	37.5498	-122.051	FE	=	8300	UG/L	2014-01-30	ENVIRONMENTAL MONITORING (WELLS)	EDF	ALAMEDA	2	SANTA CLARA VALLEY - NILES CONE (2-9.01)	25	10
SL18244665	GW-22C	37.9427	-122.374	FE	=	451	UG/L	2015-10-01	ENVIRONMENTAL MONITORING (WELLS)	EDF	CONTRA COSTA	2	SANTA CLARA VALLEY - EAST BAY PLAIN (2-9.04)	15	9
T0601300383	MW-7	37.7767	-121.978	FE	=	6940	UG/L	2015-07-20	ENVIRONMENTAL MONITORING (WELLS)	EDF	CONTRA COSTA	2	SAN RAMON VALLEY (2-7)	16	7
W0602110501	2110501-004	38.046	-122.87	FE	<	100	UG/L	2013-12-03	WATER SUPPLY (WELLS)	DHS	MARIN	2	NO BASIN FOUND	10	2
W0602110501	2110501-004	38.046	-122.87	FE		210	UG/L	2014-03-18	WATER SUPPLY (WELLS)	DHS	MARIN	2	NO BASIN FOUND	10	2
W0602110501	2110501-004	38.046	-122.87	FE	<	0	UG/L	2014-08-19	WATER SUPPLY (WELLS)	DHS	MARIN	2	NO BASIN FOUND	10	2
W0602110501	2110501-004	38.046	-122.87	FE	<	100	UG/L	2016-06-07	WATER SUPPLY (WELLS)	DHS	MARIN	2	NO BASIN FOUND	10	2
W0602110501	2110501-004	38.046	-122.87	FE		110	UG/L	2016-07-05	WATER SUPPLY (WELLS)	DHS	MARIN	2	NO BASIN FOUND	10	2
W0602110006	2110006-001	38.075	-122.791	FE		0.235	UG/L	2015-03-24	WATER SUPPLY (WELLS)	DHS	MARIN	2	NO BASIN FOUND	10	2
W0602110006	2110006-001	38.075	-122.791	FE		140	UG/L	2016-02-16	WATER SUPPLY (WELLS)	DHS	MARIN	2	NO BASIN FOUND	10	2
W0604110009	4110009-008	37.669	-122.435	FE		9.48	UG/L	2014-09-08	WATER SUPPLY (WELLS)	DHS	SAN MATEO	2	WESTSIDE (2-35)	19	13
W0604900562	4900562-002	38.306	-122.553	FE		180	UG/L	2014-04-28	WATER SUPPLY (WELLS)	DHS	SONOMA	2	NO BASIN FOUND	4	3
W0602110501	2110501-003	38.046	-122.87	FE		1100	UG/L	2014-01-14	WATER SUPPLY (WELLS)	DHS	MARIN	2	NO BASIN FOUND	10	2
W0604310011	4310011-142	37.292	-121.88	FE	<	0	UG/L	2016-02-08	WATER SUPPLY (WELLS)	DHS	SANTA CLARA	2	SANTA CLARA VALLEY - SANTA CLARA (2-9.02)	27	15
W0604310011	4310011-137	37.321	-121.959	FE	<	0	UG/L	2016-02-24	WATER SUPPLY (WELLS)	DHS	SANTA CLARA	2	SANTA CLARA VALLEY - SANTA CLARA (2-9.02)	28	15
W0604300525	4300525-003	37.147	-121.959	FE		1200	UG/L	2016-07-26	WATER SUPPLY (WELLS)	DHS	SANTA CLARA	2	NO BASIN FOUND	28	15
W0604310011	4310011-128	37.321	-121.959	FE	<	100	UG/L	2015-05-14	WATER SUPPLY (WELLS)	DHS	SANTA CLARA	2	SANTA CLARA VALLEY - SANTA CLARA (2-9.02)	28	15
W0604310011	4310011-126	37.321	-121.959	FE	<	0	UG/L	2015-10-20	WATER SUPPLY (WELLS)	DHS	SANTA CLARA	2	SANTA CLARA VALLEY - SANTA CLARA (2-9.02)	28	15
W0604310011	4310011-110	37.321	-121.84	FE	<	100	UG/L	2013-12-10	WATER SUPPLY (WELLS)	DHS	SANTA CLARA	2	SANTA CLARA VALLEY - SANTA CLARA (2-9.02)	27	15
W0604310001	4310001-002	37.35	-122.038	FE	<	0	UG/L	2015-10-06	WATER SUPPLY (WELLS)	DHS	SANTA CLARA	2	SANTA CLARA VALLEY - SANTA CLARA (2-9.02)	24	13
W0604310011	4310011-016	37.379	-121.92	FE	<	100	UG/L	2015-04-13	WATER SUPPLY (WELLS)	DHS	SANTA CLARA	2	SANTA CLARA VALLEY - SANTA CLARA (2-9.02)	25	10
W0604310011	4310011-024	37.321	-121.92	FE	<	100	UG/L	2015-03-04	WATER SUPPLY (WELLS)	DHS	SANTA CLARA	2	SANTA CLARA VALLEY - SANTA CLARA (2-9.02)	28	15
W0604310011	4310011-089	37.35	-121.88	FE		2600	UG/L	2014-09-10	WATER SUPPLY (WELLS)	DHS	SANTA CLARA	2	SANTA CLARA VALLEY - SANTA CLARA (2-9.02)	27	15
W0604310011	4310011-089	37.35	-121.88	FE		140	UG/L	2014-11-06	WATER SUPPLY (WELLS)	DHS	SANTA CLARA	2	SANTA CLARA VALLEY - SANTA CLARA (2-9.02)	27	15
W0604310011	4310011-093	37.35	-121.88	FE		110	UG/L	2015-07-21	WATER SUPPLY (WELLS)	DHS	SANTA CLARA	2	SANTA CLARA VALLEY - SANTA CLARA (2-9.02)	27	15
W0600110003	0110003-005	37.669	-121.761	FE		280	UG/L	2013-12-17	WATER SUPPLY (WELLS)	DHS	ALAMEDA	2	LIVERMORE VALLEY (2-10)	16	7
W0600110001	0110001-036	37.553	-121.999	FE	<	100	UG/L	2016-07-18	WATER SUPPLY (WELLS)	DHS	ALAMEDA	2	SANTA CLARA VALLEY - NILES CONE (2-9.01)	20	10
W0600110008	0110008-002	37.669	-121.88	FE	<	0	UG/L	2015-08-31	WATER SUPPLY (WELLS)	DHS	ALAMEDA	2	LIVERMORE VALLEY (2-10)	16	7
W0604910006	4910006-009	38.248	-122.633	FE		240	UG/L	2014-03-13	WATER SUPPLY (WELLS)	DHS	SONOMA	2	PETALUMA VALLEY (2-1)	10	3
W0600110010	0110010-005	37.669	-121.92	FE		0	UG/L	2015-06-26	WATER SUPPLY (WELLS)	DHS	ALAMEDA	2	LIVERMORE VALLEY (2-10)	16	7
W0600710008	0710008-002	38.017	-121.92	FE	<	0	UG/L	2014-07-02	WATER SUPPLY (WELLS)	DHS	CONTRA COSTA	2	PITTSBURG PLAIN (2-4)	14	7
W0604910025	4910025-002	38.422	-122.553	FE	<	100	UG/L	2015-06-15	WATER SUPPLY (WELLS)	DHS	SONOMA	2	KENWOOD VALLEY (2-19)	4	2
W0604910006	4910006-032	38.248	-122.593	FE	<	0	UG/L	2015-09-23	WATER SUPPLY (WELLS)	DHS	SONOMA	2	PETALUMA VALLEY (2-1)	10	3
W0604910013	4910013-005	38.335	-122.474	FE	<	0	UG/L	2014-02-12	WATER SUPPLY (WELLS)	DHS	SONOMA	2	NO BASIN FOUND	4	2
W0602800625	2800625-006	38.567	-122.474	FE	<	100	UG/L	2013-12-18	WATER SUPPLY (WELLS)	DHS	NAPA	2	NO BASIN FOUND	4	3
W0600110001	0110001-013	37.553	-121.999	FE	<	100	UG/L	2016-07-25	WATER SUPPLY (WELLS)	DHS	ALAMEDA	2	SANTA CLARA VALLEY - NILES CONE (2-9.01)	20	10
W0604310001	4310001-032	37.408	-122.118	FE		18.06	UG/L	2014-06-04	WATER SUPPLY (WELLS)	DHS	SANTA CLARA	2	SANTA CLARA VALLEY - SANTA CLARA (2-9.02)	24	13
W0604310001	4310001-032	37.408	-122.118	FE	<	0	UG/L	2015-09-15	WATER SUPPLY (WELLS)	DHS	SANTA CLARA	2	SANTA CLARA VALLEY - SANTA CLARA (2-9.02)	24	13
W0604310001	4310001-032	37.408	-122.118	FE		31.02	UG/L	2014-09-09	WATER SUPPLY (WELLS)	DHS	SANTA CLARA	2	SANTA CLARA VALLEY - SANTA CLARA (2-9.02)	24	13
W0604310001	4310001-032	37.408	-122.118	FE	<	0	UG/L	2015-09-02	WATER SUPPLY (WELLS)	DHS	SANTA CLARA	2	SANTA CLARA VALLEY - SANTA CLARA (2-9.02)	24	13
W0604310001	4310001-032	37.408	-122.118	FE	<	0	UG/L	2016-06-01	WATER SUPPLY (WELLS)	DHS	SANTA CLARA	2	SANTA CLARA VALLEY - SANTA CLARA (2-9.02)	24	13
W0604300715	4300715-002	37.147	-121.84	FE		270	UG/L	2015-06-24	WATER SUPPLY (WELLS)	DHS	SANTA CLARA	2	NO BASIN FOUND	29	15
W0604110020	4110020-004	37.466	-122.157	FE	<	0	UG/L	2014-06-11	WATER SUPPLY (WELLS)	DHS	SAN MATEO	2	SANTA CLARA VALLEY - SAN MATEO PLAIN (2-9.03)	24	13
W0604310001	4310001-035	37.408	-122.118	FE		37.22	UG/L	2014-12-02	WATER SUPPLY (WELLS)	DHS	SANTA CLARA	2	SANTA CLARA VALLEY - SANTA CLARA (2-9.02)	24	13
W0604310001	4310001-035	37.408	-122.118	FE	<	0	UG/L	2015-09-02	WATER SUPPLY (WELLS)	DHS	SANTA CLARA	2	SANTA CLARA VALLEY - SANTA CLARA (2-9.02)	24	13
W0604310001	4310001-015	37.321	-122.038	FE	<	0	UG/L	2015-02-03	WATER SUPPLY (WELLS)	DHS	SANTA CLARA	2	SANTA CLARA VALLEY - SANTA CLARA (2-9.02)	28	15
W0604310001	4310001-035	37.408	-122.118	FE	<	0	UG/L	2016-03-21	WATER SUPPLY (WELLS)	DHS	SANTA CLARA	2	SANTA CLARA VALLEY - SANTA CLARA (2-9.02)	24	13
W0604310011	4310011-060	37.379	-121.88	FE		300	UG/L	2014-01-09	WATER SUPPLY (WELLS)	DHS	SANTA CLARA	2	SANTA CLARA VALLEY - SANTA CLARA (2-9.02)	25	10
W0600710002	0710002-004	38.017	-121.959	FE	<	100	UG/L	2014-01-07	WATER SUPPLY (WELLS)	DHS	CONTRA COSTA	2	PITTSBURG PLAIN (2-4)	14	7
W0604901061	4901061-001	38.248	-122.435	FE	<	0	UG/L	2016-01-18	WATER SUPPLY (WELLS)	DHS	SONOMA	2	NAPA-SONOMA VALLEY - SONOMA VALLEY (2-2.02)	10	3
W0604100538	4100538-005	37.292	-122.276	FE		510	UG/L	2014-09-08	WATER SUPPLY (WELLS)	DHS	SAN MATEO	2	NO BASIN FOUND	24	13
W0604100538	4100538-005	37.292	-122.276	FE		690	UG/L	2015-03-11	WATER SUPPLY (WELLS)	DHS	SAN MATEO	2	NO BASIN FOUND	24	13
W0604100538	4100538-005	37.292	-122.276	FE		2800	UG/L	2015-08-12	WATER SUPPLY (WELLS)	DHS	SAN MATEO	2	NO BASIN FOUND	24	13
W0604100538	4100538-005	37.292	-122.276	FE		270	UG/L	2015-12-02	WATER SUPPLY (WELLS)	DHS	SAN MATEO	2	NO BASIN FOUND	24	13
W0602000573	2000573-001	38.248	-122.95	FE		6500	UG/L	2016-06-07	WATER SUPPLY (WELLS)	DHS	MARIN	2	NO BASIN FOUND	10	2
W0602801002	2801002-001	38.248	-122.316	FE	<	0	UG/L	2015-12-07	WATER SUPPLY (WELLS)	DHS	NAPA	2	NAPA-SONOMA VALLEY - NAPA-SONOMA LOWLANDS (2-2.03)	4	3
W0604901355	4901355-002	38.335	-122.593	FE	<	100	UG/L	2014-10-28	WATER SUPPLY (WELLS)	DHS	SONOMA	2	NO BASIN FOUND	10	3
W0602100565	2100565-001	37.872	-122.553	FE	<	100	UG/L	2016-07-11	WATER SUPPLY (WELLS)	DHS	MARIN	2	NO BASIN FOUND	10	2
W0604310011	4310011-037	37.408	-121.88	FE		300	UG/L	2014-08-13	WATER SUPPLY (WELLS)	DHS	SANTA CLARA	2	SANTA CLARA VALLEY - SANTA CLARA (2-9.02)	25	10
W0602810001	2810001-002	38.596	-122.474	FE		130	UG/L	2014-01-20	WATER SUPPLY (WELLS)	DHS	NAPA	2	NO BASIN FOUND	4	3
W0602110007	2110007-007	38.248	-122.95	FE		6700	UG/L	2015-07-15	WATER SUPPLY (WELLS)	DHS	MARIN	2	WILSON GROVE FORMATION HIGHLANDS (1-59)	10	2
W0604310019	4310019-005	37.408	-121.92	FE	<	100	UG/L	2014-02-11	WATER SUPPLY (WELLS)	DHS	SANTA CLARA	2	SANTA CLARA VALLEY - SANTA CLARA (2-9.02)	25	10
W0600110010	0110010-017	37.698	-121.84	FE		0	UG/L	2016-03-03	WATER SUPPLY (WELLS)	DHS	ALAMEDA	2	LIVERMORE VALLEY (2-10)	16	7
W0604310020	4310020-001	37.292	-121.84	FE	<	100	UG/L	2014-03-27	WATER SUPPLY (WELLS)	DHS	SANTA CLARA	2	SANTA CLARA VALLEY - SANTA CLARA (2-9.02)	27	15
W0604900563	4900563-003	38.306	-122.474	FE	<	100	UG/L	2014-04-30	WATER SUPPLY (WELLS)	DHS	SONOMA	2	NO BASIN FOUND	4	2
W0600110010	0110010-017	37.698	-121.84	FE		0	UG/L	2016-07-13	WATER SUPPLY (WELLS)	DHS	ALAMEDA	2	LIVERMORE VALLEY (2-10)	16	7
W0602110008	2110008-011	38.248	-122.95	FE	<	100	UG/L	2014-05-14	WATER SUPPLY (WELLS)	DHS	MARIN	2	SAND POINT AREA (2-27)	10	2
W0604110009	4110009-007	37.669	-122.435	FE		8.644	UG/L	2014-02-04	WATER SUPPLY (WELLS)	DHS	SAN MATEO	2	WESTSIDE (2-35)	22	13
W0604110009	4110009-006	37.669	-122.435	FE		3.972	UG/L	2014-12-04	WATER SUPPLY (WELLS)	DHS	SAN MATEO	2	WESTSIDE (2-35)	22	13
W0604310006	4310006-001	37.176	-121.642	FE	<	0	UG/L	2015-07-21	WATER SUPPLY (WELLS)	DHS	SANTA CLARA	2	SANTA CLARA VALLEY - SANTA CLARA (2-9.02)	30	17
W0604110009	4110009-007	37.669	-122.435	FE		11.45	UG/L	2015-06-01	WATER SUPPLY (WELLS)	DHS	SAN MATEO	2	WESTSIDE (2-35)	22	13
W0604310011	4310011-030	37.321	-121.88	FE		130	UG/L	2014-11-05	WATER SUPPLY (WELLS)	DHS	SANTA CLARA	2	SANTA CLARA VALLEY - SANTA CLARA (2-9.02)	27	15
T0608186803	MW-7	37.5766	-122.346	FE	=	24200	UG/L	2015-03-25	ENVIRONMENTAL MONITORING (WELLS)	EDF	SAN MATEO	2	WESTSIDE (2-35)	22	13
T0600101486	MW-6	37.7988	-122.27	FE	=	110	UG/L	2014-02-06	ENVIRONMENTAL MONITORING (WELLS)	EDF	ALAMEDA	2	SANTA CLARA VALLEY - EAST BAY PLAIN (2-9.04)	18	9
[truncated: 609 more rows]

## Sheet: Sheet1
	CONTRA COSTA	T0601300383	950000		9931.35
	CONTRA COSTA	SL1823a658	714000
	SAN MATEO	T10000001468	690000
	CONTRA COSTA	SL1823a658	510000
	CONTRA COSTA	SL1823a658	488000
	CONTRA COSTA	SL18316736	470000
	SAN MATEO	T10000001468	450000
	CONTRA COSTA	T0601300383	410000
	ALAMEDA	T0600101803	370000
	SAN MATEO	T10000001468	370000
	SAN MATEO	T10000001468	350000
	CONTRA COSTA	T0601300383	340000
	SANTA CLARA	T0608500255	270000
	SAN MATEO	T10000001468	260000
	SAN MATEO	T10000001468	250000
	SANTA CLARA	T10000004547	240000
	CONTRA COSTA	T0601300383	233000
	SAN MATEO	T10000001468	210000
	SAN MATEO	T10000001468	200000
	SAN MATEO	T0608100077	200000
	CONTRA COSTA	T0601300383	191000
	SAN MATEO	T10000001468	190000
	SAN MATEO	T0608100077	180000
	SAN MATEO	T10000001468	180000
	CONTRA COSTA	T0601300383	180000
	SAN MATEO	T0608100077	160000
	SAN MATEO	T10000001468	160000
	SAN MATEO	T10000001468	160000
	CONTRA COSTA	SL18316736	160000
	CONTRA COSTA	T0601300383	152000
	CONTRA COSTA	T0601300383	150000
	CONTRA COSTA	T0601300383	150000
	SAN MATEO	T10000001468	140000
	CONTRA COSTA	T0601300383	134000
	SAN MATEO	T10000001468	130000
	SAN MATEO	T10000001468	130000
	SAN MATEO	T10000001468	130000
	SAN MATEO	T0608100572	130000
	CONTRA COSTA	T0601300383	122000
	SAN MATEO	T10000001468	120000
	SAN MATEO	T0608100077	120000
	SANTA CLARA	T10000004547	120000
	CONTRA COSTA	L10009353957	117000
	CONTRA COSTA	T0601300383	114000
	CONTRA COSTA	L10009353957	112000
	CONTRA COSTA	T0601300383	111000
	SAN MATEO	T10000001468	110000
	ALAMEDA	T0600100980	110000
	CONTRA COSTA	L10009353957	102000
	SAN MATEO	T10000001468	100000
	CONTRA COSTA	T0601300383	98800
	CONTRA COSTA	L10009353957	98600
	CONTRA COSTA	L10009353957	97700
	SANTA CLARA	T0608590392	97000
	SANTA CLARA	T0608500255	96800
	CONTRA COSTA	T0601300383	95400
	ALAMEDA	SL0600106796	94000
	SANTA CLARA	T10000004547	93000
	SAN MATEO	T0608100077	90000
	CONTRA COSTA	T0601300383	89900
	CONTRA COSTA	T0601300383	89400
	CONTRA COSTA	T0601300383	89000
	CONTRA COSTA	T0601300383	88400
	CONTRA COSTA	T0601300383	88400
	CONTRA COSTA	T0601300383	88000
	SAN MATEO	T10000001468	87000
	SAN MATEO	T10000001468	86000
	CONTRA COSTA	T0601300383	86000
	SAN MATEO	T10000001468	86000
	CONTRA COSTA	T0601300383	83000
	CONTRA COSTA	T0601300383	82900
	CONTRA COSTA	T0601300383	82900
	CONTRA COSTA	T0601300383	82000
	ALAMEDA	T0600141337	82000
	CONTRA COSTA	T0601300383	81000
	SAN MATEO	T10000001468	81000
	SONOMA	T0609700943	81000
	ALAMEDA	T0600100980	81000
	ALAMEDA	T0600141337	81000
	CONTRA COSTA	T0601300383	80500
	SONOMA	T0609700943	80000
	ALAMEDA	T0600141337	80000
	SAN MATEO	T10000001468	79000
	SONOMA	T0609700943	78000
	CONTRA COSTA	L10009353957	77400
	CONTRA COSTA	T0601300383	74900
	ALAMEDA	T0600100980	73000
	SAN MATEO	T10000001468	72000
	SAN MATEO	T10000001468	72000
	CONTRA COSTA	T0601300383	70100
	CONTRA COSTA	T0601300383	69600
	CONTRA COSTA	T0601300383	69500
	CONTRA COSTA	SL18244665	68700
	SONOMA	T0609700788	68000
	SONOMA	T0609700943	68000
	SAN MATEO	T10000001468	68000
	CONTRA COSTA	SL18244665	67400
	CONTRA COSTA	T0601300383	67300
	SAN MATEO	T10000001468	66000
	SAN MATEO	T0608100077	65700
	ALAMEDA	T0600100939	65000
	CONTRA COSTA	T0601300383	65000
	CONTRA COSTA	T0601300383	62800
	CONTRA COSTA	T0601300383	62100
	CONTRA COSTA	T0601300383	61600
	SAN MATEO	T10000001468	61000
	MARIN	W0602110007	60000
	SAN MATEO	T0608100572	59000
	CONTRA COSTA	T0601300383	58100
	SAN MATEO	T10000001468	58000
	SAN MATEO	T0608100147	57000
	CONTRA COSTA	T0601300383	56700
	CONTRA COSTA	T0601300383	56600
	SANTA CLARA	T10000000901	56100
	SAN MATEO	T10000001468	56000
	SANTA CLARA	T10000002937	55900
	ALAMEDA	T0600100939	54000
	ALAMEDA	T0600100980	54000
	CONTRA COSTA	T0601300383	54000
	CONTRA COSTA	T0601300383	53600
	SAN MATEO	T10000001468	53000
	CONTRA COSTA	T0601300383	52000
	ALAMEDA	T0600100939	52000
	SANTA CLARA	T10000004547	52000
	CONTRA COSTA	T0601300383	51800
	CONTRA COSTA	T0601300383	51200
	ALAMEDA	T0600100980	50000
	SAN MATEO	T0608100147	50000
	SAN MATEO	T0608100147	49000
	SAN MATEO	T10000001468	49000
	CONTRA COSTA	T0601300383	48900
	SANTA CLARA	T0608590392	48000
	SAN MATEO	T10000001468	48000
	SAN MATEO	T10000001468	48000
	SAN MATEO	T10000001468	48000
	CONTRA COSTA	T0601300383	47500
	SANTA CLARA	T10000004547	47000
	SANTA CLARA	SL0608587626	47000
	CONTRA COSTA	T0601300383	46600
	SAN MATEO	T10000001468	46000
	SAN MATEO	T10000001468	46000
	ALAMEDA	T0600100980	46000
	CONTRA COSTA	T0601300383	46000
	CONTRA COSTA	T0601300383	45600
	SANTA CLARA	T10000004547	45000
	CONTRA COSTA	T0601300383	44400
	ALAMEDA	T0600100980	44000
	CONTRA COSTA	T0601300383	43200
	CONTRA COSTA	T0601300383	43100
	ALAMEDA	T0600100980	43000
	ALAMEDA	T0600100980	43000
	MARIN	T0609592162	43000
	MARIN	T0609592161	43000
	CONTRA COSTA	T0601300383	42100
	SONOMA	T0609700788	42000
	ALAMEDA	T0600100980	42000
	SAN MATEO	T10000001468	42000
	SAN MATEO	T10000001468	42000
	CONTRA COSTA	T0601300383	41600
	CONTRA COSTA	T0601300383	41600
	CONTRA COSTA	T0601300383	41400
	SONOMA	T0609700943	41000
	SAN MATEO	T10000001468	41000
	CONTRA COSTA	T0601300383	40200
	CONTRA COSTA	T0601300383	40000
	ALAMEDA	T0600100980	40000
	SANTA CLARA	T0608500255	38300
	SAN MATEO	T10000001468	38000
	SAN MATEO	T10000001468	38000
	ALAMEDA	T0600100980	38000
	SAN MATEO	T0608100572	37000
	SONOMA	T0609700943	37000
	SAN MATEO	T10000001468	36000
	SONOMA	T0609700943	36000
	CONTRA COSTA	T0601300383	35900
	CONTRA COSTA	T0601300383	35900
	CONTRA COSTA	T0601300383	35600
	CONTRA COSTA	T0601300383	35600
	CONTRA COSTA	T0601300383	35300
	CONTRA COSTA	L10009353957	35200
	ALAMEDA	T0600100980	35000
	CONTRA COSTA	T0601300383	34500
	ALAMEDA	SL0600106796	34000
	SONOMA	T0609700943	34000
	SAN MATEO	T10000001468	33000
	SONOMA	T0609700788	32000
	SAN MATEO	T10000001468	32000
	CONTRA COSTA	T0601300383	31400
	CONTRA COSTA	T0601300383	31400
	ALAMEDA	T0600100980	31000
	ALAMEDA	L10006224883	31000
	SAN MATEO	T10000001468	31000
	SONOMA	T0609700943	31000
	SAN MATEO	T0608100147	31000
	CONTRA COSTA	T0601300383	30200
	SAN MATEO	T10000001468	30000
	ALAMEDA	T0600101016	30000
	ALAMEDA	T0600141337	30000
	CONTRA COSTA	L10009353957	29800
	CONTRA COSTA	L10009353957	29300
	SAN MATEO	T10000001468	29000
	ALAMEDA	T0600100980	29000
	ALAMEDA	T0600100980	29000
	ALAMEDA	T0600141337	29000
	CONTRA COSTA	T0601300383	28700
	CONTRA COSTA	T0601300383	28400
	ALAMEDA	T0600100980	28000
	ALAMEDA	T0600100939	28000
	ALAMEDA	T0600101803	28000
	SAN MATEO	SL0608125065	28000
	SAN MATEO	SL0608125065	28000
	SAN MATEO	T10000001468	28000
	SAN MATEO	T10000001468	27000
	ALAMEDA	T0600141337	27000
	SAN MATEO	T10000001468	27000
	SAN MATEO	T0608164698	27000
	ALAMEDA	T0600100980	27000
	ALAMEDA	T0600101803	27000
	ALAMEDA	T0600101803	27000
	CONTRA COSTA	T0601300383	26900
	CONTRA COSTA	T0601300383	26300
	ALAMEDA	T0600101803	26000
	ALAMEDA	T0600141337	26000
	ALAMEDA	SL0600106796	25000
	ALAMEDA	T0600101516	25000
	SAN MATEO	T10000001468	25000
	ALAMEDA	T0600100939	25000
	SAN MATEO	SL0608183007	25000
	SAN MATEO	T0608186803	24200
	ALAMEDA	T0600101803	24000
	CONTRA COSTA	T0601300383	24000
	ALAMEDA	T0600100939	24000
	ALAMEDA	T0600100406	24000
	ALAMEDA	T0600100980	24000
	MARIN	T0609592162	24000
	MARIN	T0609592161	24000
	CONTRA COSTA	L10009353957	23700
	CONTRA COSTA	T0601300383	23700
	SONOMA	T0609700788	23000
	SAN MATEO	SL0608183007	23000
	ALAMEDA	T0600100980	23000
	SAN MATEO	T10000001468	23000
	ALAMEDA	T0600101803	23000
	ALAMEDA	T0600100980	23000
	CONTRA COSTA	T0601300383	22900
	CONTRA COSTA	T0601300383	22800
	SAN MATEO	T0608100077	22800
	ALAMEDA	T0600101803	22000
	ALAMEDA	T0600100939	22000
	ALAMEDA	T0600101803	22000
	CONTRA COSTA	L10009353957	21600
	CONTRA COSTA	T0601300383	21500
	ALAMEDA	T0600100980	21000
	SAN MATEO	T0608100077	20900
	ALAMEDA	T0600101803	20000
	ALAMEDA	T0600101803	20000
	CONTRA COSTA	T060130953	20000
	SAN MATEO	T0608100077	20000
	ALAMEDA	T0600100939	20000
	ALAMEDA	T0600100421	19000
	SAN MATEO	T10000001468	19000
	SAN MATEO	T0608100661	19000
	SAN MATEO	T0608164698	19000
	ALAMEDA	T0600101803	19000
	SONOMA	T0609700943	19000
	CONTRA COSTA	T0601300383	18900
	CONTRA COSTA	T0601300383	18400
	MARIN	T0609592161	18000
	SAN MATEO	T0608164698	18000
	SAN MATEO	T0608100077	18000
	NO COUNTY FOUND	L10006224883	18000
	MARIN	T0609592162	18000
	CONTRA COSTA	T0601300383	18000
	SAN MATEO	T0608100077	18000
	SAN MATEO	T0608100077	18000
	SONOMA	T0609700943	18000
	CONTRA COSTA	T0601300383	17800
	CONTRA COSTA	T0601300383	17400
	SANTA CLARA	T10000000901	17300
	CONTRA COSTA	T0601300383	17200
	SAN MATEO	T10000001468	17000
	ALAMEDA	L10006224883	17000
	SONOMA	T0609700788	17000
	ALAMEDA	T0600101803	17000
	SAN MATEO	T0608100147	17000
	SAN MATEO	T0608100077	16700
	CONTRA COSTA	T0601300383	16400
	ALAMEDA	T0600100939	16000
	ALAMEDA	T0600141337	16000
	SAN MATEO	T0608100572	16000
	SANTA CLARA	T10000000901	16000
	CONTRA COSTA	SL18244665	15200
	CONTRA COSTA	T0601300383	15200
	CONTRA COSTA	SL18244665	15100
	SANTA CLARA	T10000004547	15000
	ALAMEDA	T0600101803	15000
	ALAMEDA	T0600101803	15000
	CONTRA COSTA	T0601300383	15000
	SAN MATEO	T10000001468	15000
	SAN MATEO	T0608100147	15000
	SAN MATEO	T0608164698	15000
	SANTA CLARA	T10000004547	15000
	ALAMEDA	T0600100980	15000
	SANTA CLARA	T10000000901	14600
	CONTRA COSTA	T0601300383	14200
	SAN MATEO	T0608100147	14000
	SAN MATEO	T0608100077	14000
	SANTA CLARA	T10000004547	14000
	ALAMEDA	T0600100939	14000
	ALAMEDA	T0600100939	14000
	CONTRA COSTA	T10000003609	14000
	ALAMEDA	T0600101866	13000
	ALAMEDA	T0600100939	13000
	ALAMEDA	T0600101016	13000
	SAN MATEO	T0608100147	13000
	SAN MATEO	T0608100147	13000
	ALAMEDA	T0600101483	12300
	CONTRA COSTA	T0601300383	12100
	SAN MATEO	T0608100661	12000
	SANTA CLARA	T0608590392	12000
	CONTRA COSTA	T0601300383	12000
	ALAMEDA	T0600101016	12000
	SAN MATEO	T0608100147	12000
	ALAMEDA	T0600101483	11900
	CONTRA COSTA	T0601300383	11900
	CONTRA COSTA	T0601300383	11600
	CONTRA COSTA	SL18244665	11300
	CONTRA COSTA	T10000003609	11000
	ALAMEDA	T0600141337	11000
	SANTA CLARA	T10000004547	11000
	SAN MATEO	T0608100661	11000
	SANTA CLARA	T0608590392	11000
	ALAMEDA	T0600101803	11000
	ALAMEDA	T0600101516	11000
	ALAMEDA	T0600101016	11000
	CONTRA COSTA	T10000000666	11000
	SAN MATEO	T0608100661	11000
	SAN MATEO	T0608100147	11000
	SAN MATEO	T0608100077	11000
	CONTRA COSTA	T0601300383	10900
	CONTRA COSTA	SL18244665	10900
	CONTRA COSTA	T0601300383	10100
	SAN MATEO	T0608100077	10000
	CONTRA COSTA	T10000003609	10000
	ALAMEDA	T0600100939	10000
	ALAMEDA	T0600100939	10000
	ALAMEDA	T0600100939	10000
	SAN MATEO	T0608100661	10000
	SAN MATEO	T0608164698	10000
	SAN MATEO	T0608100147	10000
	SANTA CLARA	SL720501209	10000
	ALAMEDA	T0600100980	10000
	SAN MATEO	T0608100572	10000
	ALAMEDA	T0600101803	9900
	SAN MATEO	T0608164698	9800
	SONOMA	T0609700943	9800
	SONOMA	T0609700943	9700
	NAPA	W0602800531	9600
	SAN MATEO	T0608100572	9400
	CONTRA COSTA	T10000003609	9300
	SANTA CLARA	T10000000901	9300
	ALAMEDA	T0600100939	9300
	SANTA CLARA	SL1823F1131	9280
	SAN MATEO	T10000001468	9100
	SAN MATEO	T0608100147	9100
	CONTRA COSTA	L10009353957	9040
	ALAMEDA	T0600100939	9000
	ALAMEDA	T0600141337	8900
	SAN MATEO	T0608100572	8900
	ALAMEDA	T0600100980	8900
	SAN MATEO	W0604110011	8900
	SAN MATEO	T10000001468	8900
	SAN MATEO	T0608100661	8900
	SAN MATEO	T10000001468	8800
	ALAMEDA	SL1823K1135	8800
	CONTRA COSTA	T10000003609	8800
	SONOMA	T0609700943	8800
	SANTA CLARA	W0604410016	8700
	CONTRA COSTA	T10000003609	8600
	SAN MATEO	W0604110028	8500
	ALAMEDA	T0600101516	8500
	SAN MATEO	T0608100147	8400
	SANTA CLARA	T0608501140	8400
	CONTRA COSTA	L10009353957	8350
	SAN MATEO	W0604110028	8300
	CONTRA COSTA	T0601300383	8300
	ALAMEDA	T0600101803	8300
	ALAMEDA	SL1823K1135	8300
	SANTA CLARA	SL720501209	8300
	ALAMEDA	T0600101516	8200
	ALAMEDA	T0600101516	8100
	SAN MATEO	T0608100147	8100
	CONTRA COSTA	T0601300383	8040
	SAN MATEO	T0608100661	8000
	SAN MATEO	T0608100147	8000
	SONOMA	T0609700943	8000
	ALAMEDA	T0600100939	8000
	SAN MATEO	T0608100147	7900
	SAN MATEO	T0608100147	7800
	SAN MATEO	T0608100077	7790
	ALAMEDA	T0600101803	7700
	SAN MATEO	T10000001468	7700
	CONTRA COSTA	T0601300383	7680
	CONTRA COSTA	T0601300383	7580
	SANTA CLARA	T10000002937	7460
	SAN MATEO	T0608100147	7400
	SAN MATEO	T0608100147	7400
	ALAMEDA	T0600101803	7400
	CONTRA COSTA	SL20210828	7360
	SANTA CLARA	T10000000901	7340
	ALAMEDA	T0600101516	7300
	ALAMEDA	T0600101016	7300
	CONTRA COSTA	L10009353957	7270
	ALAMEDA	T0600101516	7200
	MARIN	W0602110007	7200
	SANTA CLARA	W0604300740	7200
	SAN MATEO	T10000001468	7100
	SANTA CLARA	SL720501209	7000
	MARIN	W0602110007	7000
	SONOMA	T0609700943	7000
	SAN MATEO	T0608100661	7000
	ALAMEDA	T0600100980	7000
	SAN MATEO	T0608100147	7000
	CONTRA COSTA	T0601300383	6940
	ALAMEDA	T0600101866	6900
	ALAMEDA	T0600101516	6900
	SANTA CLARA	T0608500255	6820
	CONTRA COSTA	T0601300383	6820
	SAN MATEO	SL0608183007	6800
	ALAMEDA	T0600101016	6800
	SAN MATEO	SL0608183007	6700
	ALAMEDA	T0600100939	6700
	ALAMEDA	T0600101016	6700
	MARIN	W0602110007	6700
	SAN MATEO	T0608100147	6600
	SAN MATEO	T0608100661	6600
	ALAMEDA	T0600101410	6600
	CONTRA COSTA	T10000003609	6600
	SANTA CLARA	T10000000901	6520
	ALAMEDA	T0600101516	6500
	ALAMEDA	T0600100939	6500
	MARIN	W0602000573	6500
	SANTA CLARA	T0608500255	6470
	SAN MATEO	T0608100147	6400
	ALAMEDA	T0600101516	6400
	SAN MATEO	T0608100147	6400
	ALAMEDA	T0600100421	6300
	SAN MATEO	T0608100661	6300
	SAN MATEO	T0608100147	6300
	SAN MATEO	T0608100661	6300
	CONTRA COSTA	L10009353957	6280
	ALAMEDA	T0600101483	6230
	ALAMEDA	SL0600106796	6200
	CONTRA COSTA	T10000003609	6200
	SAN MATEO	T0608100661	6200
	ALAMEDA	T0600101516	6200
	ALAMEDA	T0600101016	6200
	ALAMEDA	T0600100980	6200
	SANTA CLARA	T0608501548	6200
	SONOMA	T0609700943	6200
	SANTA CLARA	T0608509697	6200
	CONTRA COSTA	T0601300383	6160
	CONTRA COSTA	T0601300383	6160
	CONTRA COSTA	SL20210828	6120
	MARIN	W0602100579	6100
	NAPA	W0602801002	6100
	SAN MATEO	T10000001468	6100
	ALAMEDA	T0600100980	6100
	CONTRA COSTA	SL1823a658	6070
	CONTRA COSTA	L10009353957	6040
	CONTRA COSTA	T0601300383	6030
	SAN MATEO	T0608100147	6000
	SAN MATEO	T0608100147	5900
	ALAMEDA	T0600101516	5900
	ALAMEDA	T0600101016	5900
	SONOMA	T0609700788	5900
	SAN MATEO	T10000001468	5900
	ALAMEDA	T0600100939	5900
	ALAMEDA	T0600101516	5800
	ALAMEDA	T0600101516	5700
	ALAMEDA	T0600101016	5700
	CONTRA COSTA	T0601300383	5650
	CONTRA COSTA	L10009353957	5620
	ALAMEDA	T0600100939	5600
	ALAMEDA	T0600101803	5600
	ALAMEDA	T0600100939	5600
	SONOMA	T0609700943	5600
	SANTA CLARA	T10000000901	5530
	SAN MATEO	T10000001468	5500
	SANTA CLARA	SL720501209	5500
	SANTA CLARA	T0608500255	5500
	CONTRA COSTA	T0601300383	5500
	SAN MATEO	T10000001468	5500
	CONTRA COSTA	L10009353957	5410
	SANTA CLARA	T10000004547	5400
	SAN MATEO	T0608100661	5400
	SAN MATEO	T0608100147	5400
	SAN MATEO	T10000001468	5400
	CONTRA COSTA	T0601300383	5350
	ALAMEDA	T0600101516	5300
	SAN MATEO	T0608100147	5300
	SANTA CLARA	T0608501140	5300
	ALAMEDA	T0600101016	5300
	CONTRA COSTA	L10009353957	5270
	ALAMEDA	T0600100939	5200
	SAN MATEO	W0604110028	5100
	ALAMEDA	T0600101410	5100
	CONTRA COSTA	T10000000666	5100
	SANTA CLARA	L10002276721	5100
	SAN MATEO	T0608164698	5000
	NO COUNTY FOUND	L10006224883	5000
	CONTRA COSTA	L10009353957	4970
	ALAMEDA	T0600100939	4900
	SAN MATEO	T0608100661	4900
	ALAMEDA	T0600100980	4900
	ALAMEDA	T0600101016	4900
	ALAMEDA	T0600101516	4900
	ALAMEDA	T0600100939	4900
	ALAMEDA	T0600100939	4900
	CONTRA COSTA	T0601300383	4880
	SAN MATEO	T0608100077	4880
	SAN MATEO	T0608100077	4820
	SANTA CLARA	T10000002937	4800
	ALAMEDA	T0600101016	4800
	SAN MATEO	T0608164698	4800
	SAN MATEO	T0608100572	4800
	MARIN	W0602110007	4800
	SAN MATEO	SL0608125065	4800
	ALAMEDA	T0600101866	4800
	SAN MATEO	W0604100533	4800
	SAN MATEO	T0608100147	4800
	SAN MATEO	T0608100147	4800
	ALAMEDA	T0600101410	4700
	ALAMEDA	T0600101016	4700
	SAN MATEO	W0604110028	4700
	SAN MATEO	T0608100147	4700
	SAN MATEO	T0608100147	4700
	ALAMEDA	T0600101803	4700
	CONTRA COSTA	T10000003609	4700
	CONTRA COSTA	T0601300383	4690
	SAN MATEO	W0604110028	4600
	SANTA CLARA	T0608590392	4600
	ALAMEDA	T0600101516	4600
	ALAMEDA	T0600100939	4600
	SANTA CLARA	T10000000901	4550
	CONTRA COSTA	T0601300383	4530
	CONTRA COSTA	T0601300383	4520
	SAN MATEO	W0604110028	4500
	SONOMA	T0609700788	4500
	SAN MATEO	W0604100533	4500
	NO COUNTY FOUND	L10006224883	4500
	SAN MATEO	T10000001468	4500
	SAN MATEO	W0604110028	4500
	ALAMEDA	T0600101483	4450
	ALAMEDA	T0600100939	4400
	SAN MATEO	W0604110028	4400
	SANTA CLARA	W0604410016	4400
	ALAMEDA	T0600101516	4400
	ALAMEDA	T0600101516	4300
	MARIN	W0602100579	4300
	CONTRA COSTA	T10000003609	4300
	SAN MATEO	T0608100147	4300
	ALAMEDA	T0600101410	4300
	CONTRA COSTA	L10009353957	4250
	SAN MATEO	T0608100147	4200
	SANTA CLARA	W0604300525	4200
	NO COUNTY FOUND	L10006224883	4200
	SAN MATEO	T0608100147	4200
	ALAMEDA	T0600101803	4200
	SAN MATEO	W0604110028	4200
	CONTRA COSTA	L10009353957	4170
	SAN MATEO	T0608100147	4100
	SAN MATEO	T0608100077	4100
	SAN MATEO	T0608164698	4100
	SAN MATEO	T0608100147	4100
	SAN MATEO	W0604110028	4000
	SAN MATEO	W0604110028	4000
	SAN MATEO	W0604110028	4000
	SAN MATEO	T0608100147	4000
	SAN MATEO	T0608164698	4000
	SAN MATEO	W0604110028	4000
	SAN MATEO	W0604110028	4000
	CONTRA COSTA	L10009353957	3980
	CONTRA COSTA	SL20210828	3920
	SANTA CLARA	L10006514573	3900
	ALAMEDA	T0600100939	3800
	MARIN	W0602110007	3800
	CONTRA COSTA	T0601300383	3800
	SAN MATEO	T0608100147	3800
	CONTRA COSTA	T10000003609	3800
	SAN MATEO	W0604110028	3800
	ALAMEDA	T0600101410	3800
	ALAMEDA	T0600100980	3800
	ALAMEDA	T0600100980	3800
	SAN MATEO	T0608100147	3800
	CONTRA COSTA	T0601300383	3730
	ALAMEDA	T0600101516	3700
	ALAMEDA	T0600101516	3700
	ALAMEDA	T0600101516	3700
	CONTRA COSTA	SL18244665	3700
	ALAMEDA	T0600101410	3700
	ALAMEDA	T0600101516	3700
	MARIN	T0609592161	3700
	ALAMEDA	T0600100939	3700
	SANTA CLARA	T0608500255	3700
	ALAMEDA	SL0600106796	3700
	MARIN	T0609592162	3700
	ALAMEDA	T0600101016	3700
	ALAMEDA	T0600101016	3700
	SAN MATEO	T10000001468	3700
	NO COUNTY FOUND	W0602110302	3700
	SAN MATEO	T0608100147	3700
	SAN MATEO	W0604110028	3700
	CONTRA COSTA	SL18244665	3680
	SANTA CLARA	T0608501140	3600
	SAN MATEO	T10000001468	3600
	SANTA CLARA	L10006514573	3600
	CONTRA COSTA	L10009353957	3510
	ALAMEDA	T0600100939	3500
	SANTA CLARA	T0608500255	3500
	ALAMEDA	T0600100980	3500
	NO COUNTY FOUND	L10006224883	3500
	SANTA CLARA	T0608501140	3500
	CONTRA COSTA	L10009353957	3410
	SAN MATEO	T0608100147	3400
	ALAMEDA	T0600100980	3400
	ALAMEDA	T0600101516	3400
	SAN MATEO	W0604110028	3400
	SANTA CLARA	T0608501548	3400
	SAN MATEO	W0604110028	3400
	CONTRA COSTA	T0601300383	3330
	CONTRA COSTA	L10009353957	3320
	SANTA CLARA	T0608590392	3300
	MARIN	W0602000573	3300
	ALAMEDA	T0600101516	3300
	ALAMEDA	T0600101516	3300
	SAN MATEO	T0608100147	3300
	SANTA CLARA	L10006514573	3300
	ALAMEDA	T0600101483	3240
	CONTRA COSTA	L10009353957	3210
	CONTRA COSTA	L10009353957	3200
	SANTA CLARA	W0604300525	3200
	ALAMEDA	T0600101016	3200
	SANTA CLARA	W0604300525	3200
	SAN MATEO	W0604100533	3200
	ALAMEDA	T0600101516	3200
	ALAMEDA	T0600100939	3200
	ALAMEDA	T0600101516	3200
	CONTRA COSTA	T10000003609	3100
	ALAMEDA	T0600101516	3100
	CONTRA COSTA	SL18244665	3060
	ALAMEDA	T0600101483	3060
	CONTRA COSTA	L10009353957	3000
	ALAMEDA	T0600101866	3000
	SAN MATEO	W0604110028	3000
	ALAMEDA	L10006224883	3000
	ALAMEDA	T0600101410	3000
	SAN MATEO	T0608100147	3000
	SONOMA	W0604900562	3000
	ALAMEDA	T0600101016	3000
	CONTRA COSTA	T10000003609	3000
	SANTA CLARA	T0608500255	2960
	CONTRA COSTA	L10009353957	2920
	SAN MATEO	T0608100661	2900
	SAN MATEO	T0608100572	2900
	SANTA CLARA	W0604300525	2900
	SANTA CLARA	L10006514573	2900
	SAN MATEO	T10000001468	2900
	ALAMEDA	T0600100980	2900
	SANTA CLARA	T10000000901	2880
	ALAMEDA	T0600101483	2880
	CONTRA COSTA	L10009353957	2880
	SANTA CLARA	T10000000901	2870
	CONTRA COSTA	T10000000666	2850
	ALAMEDA	T0600113164	2840
	ALAMEDA	T0600101866	2800
	SAN MATEO	T10000001468	2800
	ALAMEDA	T0600101516	2800
	ALAMEDA	SL0600106796	2800
	ALAMEDA	T0600101410	2800
	SAN MATEO	T0608164698	2800
	SAN MATEO	T0608100147	2800
	SAN MATEO	W0604110011	2800
	ALAMEDA	T0600101516	2800
	MARIN	W0602110007	2800
	SAN MATEO	W0604100538	2800
	ALAMEDA	T0600100939	2800
	ALAMEDA	T0600101410	2800
	ALAMEDA	T0600101803	2800
	SAN MATEO	W0604110028	2800
	CONTRA COSTA	T0601300383	2750
	ALAMEDA	T0600113164	2710
	SAN MATEO	T0608100661	2700
	SANTA CLARA	T0608501548	2700
	NAPA	W0602800625	2700
	SAN MATEO	W0604110028	2700
	SAN MATEO	W0604110028	2700
	ALAMEDA	T0600100980	2700
	SAN MATEO	W0604110028	2700
	ALAMEDA	T0600101516	2700
	SAN MATEO	T0608100147	2700
	SAN MATEO	T10000001468	2700
	NAPA	W0602801080	2700
	SANTA CLARA	SL1821Y617	2700
	CONTRA COSTA	T0601300383	2620
	SAN MATEO	W0604110028	2600
	NAPA	W0602801080	2600
	ALAMEDA	T0600101486	2600
	SAN MATEO	T0608100147	2600
	SANTA CLARA	W0604310011	2600
	ALAMEDA	T0600101410	2600
	ALAMEDA	T0600101803	2600
	SAN MATEO	W0604110028	2600
	SAN MATEO	T0608100147	2600
	SAN MATEO	T0608100147	2600
	ALAMEDA	T0600101410	2600
	MARIN	W0602110007	2600
	SANTA CLARA	W0604310011	2600
	SAN MATEO	T0608100147	2600
	SANTA CLARA	T0608501548	2600
	SAN MATEO	W0604110028	2600
	ALAMEDA	T0600113164	2530
	CONTRA COSTA	L10009353957	2510
	NAPA	W0602800516	2500
	ALAMEDA	T0600101516	2500
	SONOMA	T0609700788	2500
	CONTRA COSTA	T10000000666	2500
	ALAMEDA	T0600100939	2500
	ALAMEDA	T0600100421	2500
	SAN MATEO	W0604110010	2500
	ALAMEDA	T0600100980	2500
	ALAMEDA	T0600101803	2500
	CONTRA COSTA	L10009353957	2480
	CONTRA COSTA	L10009353957	2440
	SANTA CLARA	T10000000901	2410
	CONTRA COSTA	SL1823a658	2400
	ALAMEDA	T0600101016	2400
	CONTRA COSTA	T10000003609	2400
	CONTRA COSTA	T10000003609	2400
	SAN MATEO	T10000001468	2400
	ALAMEDA	T0600101516	2400
	CONTRA COSTA	L10009353957	2370
	SANTA CLARA	T10000000901	2320
	ALAMEDA	T0600101516	2300
	SONOMA	W0604900562	2300
	SANTA CLARA	T10000000901	2300
	SAN MATEO	T0608100077	2300
	SAN MATEO	T0608100147	2300
	SAN MATEO	T0608100147	2300
	SAN MATEO	T10000001468	2300
	SAN MATEO	T0608186803	2270
	SANTA CLARA	T10000000901	2220
	ALAMEDA	T0600101483	2210
	SAN MATEO	T0608100572	2200
	SONOMA	T0609700788	2200
	CONTRA COSTA	SL18316736	2200
	CONTRA COSTA	L10009353957	2140
	CONTRA COSTA	L10009353957	2110
	ALAMEDA	SL1823K1135	2100
	NAPA	W0602800625	2100
	SANTA CLARA	W0604410016	2100
	ALAMEDA	T0600101803	2100
	CONTRA COSTA	T10000003609	2100
	SAN MATEO	T10000001468	2100
	ALAMEDA	T0600101016	2100
	ALAMEDA	T0600101803	2100
	CONTRA COSTA	T10000000666	2090
	CONTRA COSTA	SL1823a658	2050
	SANTA CLARA	SL1821Y617	2000
	SANTA CLARA	T0608501548	2000
	SAN MATEO	T0608100661	2000
	ALAMEDA	T0600101866	2000
	ALAMEDA	T0600101476	2000
	CONTRA COSTA	T10000003609	2000
	SANTA CLARA	T10000000901	2000
	ALAMEDA	T0600101803	2000
	CONTRA COSTA	L10009353957	1990
	ALAMEDA	T0600101483	1980
	CONTRA COSTA	L10009353957	1940
	CONTRA COSTA	SL18244665	1920
	CONTRA COSTA	L10009353957	1910
	SANTA CLARA	T10000000901	1900
	SAN MATEO	T0608100147	1900
	MARIN	W0602110007	1900
	CONTRA COSTA	T10000003609	1900
	ALAMEDA	T0600101516	1900
	MARIN	W0602110008	1900
	CONTRA COSTA	T0601300335	1900
	CONTRA COSTA	T10000003609	1900
	SAN MATEO	T10000001468	1900
	NAPA	W0602801004	1900
	SONOMA	T0609700788	1900
	ALAMEDA	T0600113164	1900
	ALAMEDA	T0600101483	1890
	ALAMEDA	T0600101483	1890
	SAN MATEO	T0608100077	1870
	CONTRA COSTA	L10009353957	1860
	CONTRA COSTA	L10009353957	1860
	CONTRA COSTA	SL18244665	1860
	ALAMEDA	T06019741226	1850
	CONTRA COSTA	SL1823a658	1830
	CONTRA COSTA	L10009353957	1820
	SAN MATEO	T0608100077	1810
	SANTA CLARA	SL1823F1131	1810
	CONTRA COSTA	T0601300383	1810
	ALAMEDA	T0600101410	1800
	CONTRA COSTA	T10000003609	1800
	ALAMEDA	T0600101410	1800
	SAN MATEO	T0608100572	1800
	ALAMEDA	T0600101410	1800
	NAPA	W0602800625	1800
	SAN MATEO	T0608100147	1800
	SAN MATEO	T0608100077	1800
	SAN MATEO	T0608100661	1800
	SAN MATEO	T0608100147	1800
	SAN MATEO	T0608164698	1800
	SAN MATEO	W0604100538	1800
	CONTRA COSTA	L10009353957	1800
	CONTRA COSTA	SL20210828	1770
	CONTRA COSTA	L10009353957	1760
	CONTRA COSTA	T0601300383	1750
	ALAMEDA	T10000003434	1740
	ALAMEDA	T0600113164	1740
	CONTRA COSTA	L10009353957	1740
	SANTA CLARA	W0604300525	1700
	CONTRA COSTA	T0601300335	1700
	CONTRA COSTA	T10000003609	1700
	SAN MATEO	T0608164698	1700
	CONTRA COSTA	T10000003609	1700
	SANTA CLARA	T0608500710	1700
	SONOMA	T0609700788	1700
	SANTA CLARA	L10006514573	1700
	ALAMEDA	T0600101516	1700
	ALAMEDA	T0600101410	1700
	CONTRA COSTA	L10009353957	1680
	CONTRA COSTA	L10009353957	1670
	CONTRA COSTA	L10009353957	1660
	CONTRA COSTA	L10009353957	1660
	CONTRA COSTA	L10009353957	1640
	SANTA CLARA	T10000000901	1620
	SANTA CLARA	W0604300525	1600
	ALAMEDA	T0600100980	1600
	ALAMEDA	T0600101516	1600
	CONTRA COSTA	SL1823a658	1600
	ALAMEDA	T0600101483	1600
	ALAMEDA	T0600101410	1600
	CONTRA COSTA	SL1823a658	1600
	ALAMEDA	W0600110003	1600
	ALAMEDA	T0600101803	1600
	CONTRA COSTA	L10009353957	1530
	CONTRA COSTA	L10009353957	1530
	CONTRA COSTA	L10009353957	1510
	SAN MATEO	T0608100147	1500
	SAN MATEO	T0608164698	1500
	MARIN	W0602110007	1500
	NAPA	W0602800035	1500
	CONTRA COSTA	T10000003609	1500
	ALAMEDA	T0600101803	1500
	SANTA CLARA	T10000004547	1500
	CONTRA COSTA	T0601300335	1500
	NAPA	W0602800035	1500
	NAPA	W0602800035	1500
	ALAMEDA	T0600101516	1500
	NAPA	W0602800035	1500
	SANTA CLARA	T10000000901	1450
	CONTRA COSTA	L10009353957	1440
	NAPA	W0602800035	1400
	ALAMEDA	T0600101016	1400
	ALAMEDA	SL1823K1135	1400
	MARIN	T0609592161	1400
	CONTRA COSTA	T10000003609	1400
	NAPA	W0602800035	1400
	SONOMA	W0604900843	1400
	MARIN	T0609592162	1400
	CONTRA COSTA	T10000003609	1400
	ALAMEDA	T0600101016	1400
	SANTA CLARA	L10006514573	1400
	SAN MATEO	W0604100533	1400
	SAN MATEO	W0604100538	1400
	ALAMEDA	T0600101410	1400
	SANTA CLARA	L10006514573	1400
	CONTRA COSTA	T10000003609	1400
	CONTRA COSTA	L10009353957	1380
	CONTRA COSTA	L10009353957	1360
	SANTA CLARA	T10000000901	1350
	ALAMEDA	T0600101410	1300
	MARIN	T0609592162	1300
	ALAMEDA	T0600101410	1300
	ALAMEDA	T0600101410	1300
	SAN MATEO	T0608100147	1300
	SOLANO	T10000003206	1300
	ALAMEDA	T0600101866	1300
	SANTA CLARA	SL1821Y617	1300
	SANTA CLARA	L10006514573	1300
	ALAMEDA	T0600101410	1300
	MARIN	T0609592161	1300
	ALAMEDA	T0600101803	1300
	SANTA CLARA	L10006514573	1300
	SANTA CLARA	T0608500710	1300
	SOLANO	T10000003206	1300
	SANTA CLARA	W0604310020	1300
	CONTRA COSTA	T0601300335	1300
	ALAMEDA	T0600101410	1300
	SAN MATEO	T0608100661	1300
	SONOMA	W0604900562	1300
	CONTRA COSTA	T10000003609	1300
	SAN MATEO	W0604110028	1300
	SANTA CLARA	W0604410016	1200
	CONTRA COSTA	T10000003609	1200
	CONTRA COSTA	L10009353957	1200
	ALAMEDA	T0600100980	1200
	SAN MATEO	T10000001468	1200
	CONTRA COSTA	T10000003609	1200
	ALAMEDA	T0600101516	1200
	CONTRA COSTA	T10000003609	1200
	NAPA	W0602801039	1200
	CONTRA COSTA	T10000003609	1200
	SAN MATEO	W0604110020	1200
	SAN MATEO	T0608100661	1200
	SANTA CLARA	W0604300525	1200
	CONTRA COSTA	T10000003609	1200
	ALAMEDA	T0600101410	1200
	SAN MATEO	T0608100661	1200
	ALAMEDA	T0600101410	1200
	CONTRA COSTA	L10009353957	1190
	MARIN	W0602110501	1100
	NAPA	W0602810004	1100
	NAPA	W0602801029	1100
	SANTA CLARA	W0604310011	1100
	ALAMEDA	T0600101410	1100
	SANTA CLARA	W0604310011	1100
	SAN MATEO	T0608164698	1100
	SAN MATEO	W0604100538	1100
	ALAMEDA	T0600101410	1100
	SANTA CLARA	SL1821Y617	1100
	CONTRA COSTA	SL1823a658	1100
	MARIN	W0602110501	1100
	ALAMEDA	T0600101016	1100
	CONTRA COSTA	T0601300383	1080
	CONTRA COSTA	L10009353957	1080
	CONTRA COSTA	L10009353957	1080
	CONTRA COSTA	SL1823a658	1070
	CONTRA COSTA	T0601300383	1060
	SANTA CLARA	W0604310001	1039
	CONTRA COSTA	L10009353957	1030
	MARIN	W0602000573	1000
	SAN MATEO	T0608100661	1000
	MARIN	W0602110501	1000
	ALAMEDA	T0600101410	1000
	SONOMA	T0609700788	1000
	SANTA CLARA	T10000004547	1000
	SANTA CLARA	W0604310020	1000
	CONTRA COSTA	T10000003609	1000
	CONTRA COSTA	T10000003609	1000
	CONTRA COSTA	T10000003609	1000
	ALAMEDA	T0600101803	1000
	SANTA CLARA	T0608501548	1000
	CONTRA COSTA	T10000003609	1000
	ALAMEDA	T0600101516	1000
	ALAMEDA	T0600100980	1000
	ALAMEDA	T0600101410	1000
	ALAMEDA	T0600101410	1000
	SAN MATEO	T0608100661	990
	ALAMEDA	T0600101410	990
	SANTA CLARA	SL1821Y617	990
	SAN MATEO	W0604100538	990
	MARIN	W0602000573	970
	NAPA	W0602810004	970
	SANTA CLARA	W0604310011	960
	SAN MATEO	T10000001468	960
	SAN MATEO	W0604100538	960
	SAN MATEO	W0604100538	960
	ALAMEDA	T06019741226	950
	CONTRA COSTA	SL18244665	948
	SAN MATEO	T0608100661	940
	ALAMEDA	T0600101516	940
	NAPA	W0602800516	940
	MARIN	T0609592161	930
	MARIN	T0609592162	930
	SANTA CLARA	T10000000901	925
	ALAMEDA	T0600101410	920
	SAN MATEO	T0608164698	920
	ALAMEDA	T0600100980	910
	ALAMEDA	T0600101410	910
	ALAMEDA	T0600101410	900
	SAN MATEO	W0604100538	900
	SANTA CLARA	W0604310011	900
	SAN MATEO	W0604100538	890
	CONTRA COSTA	L10009353957	883
	CONTRA COSTA	L10009353957	881
	ALAMEDA	T0600101516	880
	SANTA CLARA	W0604310011	870
	ALAMEDA	T0600100421	870
	CONTRA COSTA	T0601300383	868
	ALAMEDA	T0600101410	860
	SANTA CLARA	L10006514573	860
	SAN MATEO	T0608100661	860
	SAN MATEO	T10000001468	860
	SANTA CLARA	SL1823F1131	857
	SONOMA	W0604910006	850
	ALAMEDA	T0600100980	850
	ALAMEDA	T0600101803	840
	ALAMEDA	T0600101410	840
	SANTA CLARA	T0608501548	840
	CONTRA COSTA	T10000003609	840
	SAN MATEO	SL0608125065	830
	SAN MATEO	W0604100538	830
	CONTRA COSTA	T10000003609	820
	CONTRA COSTA	T0601300383	810
	SAN MATEO	W0604100538	810
	ALAMEDA	T0600101516	810
	ALAMEDA	T0600101486	810
	ALAMEDA	T0600101516	800
	NAPA	W0602801010	800
	SAN MATEO	W0604100538	800
	SANTA CLARA	W0604300721	800
	SANTA CLARA	W0604310011	800
	ALAMEDA	T06019741226	799
	ALAMEDA	T0600101483	787
	SAN MATEO	T0608100147	780
	SANTA CLARA	T0608500710	780
	MARIN	W0602110008	780
	SANTA CLARA	W0604310011	770
	SANTA CLARA	W0604310011	770
	MARIN	W0602110007	770
	SANTA CLARA	W0604310011	760
	ALAMEDA	T0600101016	760
	ALAMEDA	T0600101410	760
	SAN MATEO	SL0608125065	760
	CONTRA COSTA	SL18244665	753
	ALAMEDA	T0600101410	750
	ALAMEDA	T0600100421	750
	SAN MATEO	W0604100538	750
	CONTRA COSTA	T10000003609	740
	ALAMEDA	T0600100980	740
	CONTRA COSTA	L10009353957	739
	CONTRA COSTA	SL20210828	731
	SANTA CLARA	W0604300715	730
	SANTA CLARA	W0604410016	730
	SAN MATEO	T0608100147	730
	NAPA	W0602801029	730
	SAN MATEO	W0604110020	720
	CONTRA COSTA	T0601300335	720
	CONTRA COSTA	L10009353957	717
	SAN MATEO	W0604100538	710
	SANTA CLARA	W0604300716	710
	SANTA CLARA	W0604310011	710
	ALAMEDA	T0600101516	710
	SANTA CLARA	L10006514573	700
	ALAMEDA	T0600101410	690
	MARIN	W0602110008	690
	ALAMEDA	T0600101516	690
	ALAMEDA	T0600101410	690
	SAN MATEO	W0604100538	690
	SAN MATEO	T10000001468	690
	ALAMEDA	T0600101410	680
	SANTA CLARA	W0604310019	680
	CONTRA COSTA	T10000003609	680
	SAN MATEO	T0608100661	680
	CONTRA COSTA	SL18244665	680
	ALAMEDA	T0600101476	680
	CONTRA COSTA	T10000000666	671
	ALAMEDA	SL1823K1135	670
	ALAMEDA	T0600101410	660
	CONTRA COSTA	T0601300383	659
	SONOMA	T0609700943	650
	CONTRA COSTA	T0601300335	650
	SAN MATEO	T0608100147	640
	SAN MATEO	T0608100077	640
	SANTA CLARA	L10006514573	640
	CONTRA COSTA	T10000000666	631
	ALAMEDA	T0600101016	630
	ALAMEDA	T0600101410	630
	ALAMEDA	SL1823K1135	630
	CONTRA COSTA	T10000003609	630
	SANTA CLARA	W0604310020	620
	ALAMEDA	T0600100421	620
	SANTA CLARA	SL1821Y617	620
	CONTRA COSTA	L10009353957	620
	NAPA	W0602810007	610
	SANTA CLARA	T0608590392	610
	ALAMEDA	T0600101410	610
	SAN MATEO	T0608100147	600
	SAN MATEO	T0608100661	600
	ALAMEDA	T0600101410	600
	CONTRA COSTA	T10000003609	600
	ALAMEDA	T0600101410	600
	SANTA CLARA	L10006514573	600
	SAN MATEO	W0604110013	580
	ALAMEDA	T0600101803	580
	SONOMA	W0604910013	580
	SONOMA	W0604901080	580
	NAPA	W0602810007	580
	SANTA CLARA	T0608501548	570
	SANTA CLARA	T10000004547	570
	SANTA CLARA	T10000000901	566
	CONTRA COSTA	T0601300383	565
	ALAMEDA	T0600101410	560
	SAN MATEO	T0608164698	550
	ALAMEDA	T0600101516	550
	SONOMA	W0604901080	550
	SANTA CLARA	W0604310011	540
	SANTA CLARA	L10006514573	540
	SOLANO	W0604800511	540
	SANTA CLARA	T0608501548	530
	SANTA CLARA	T10000000901	526
	SANTA CLARA	T10000000901	525
	SANTA CLARA	W0604310011	520
	CONTRA COSTA	L10009353957	520
	SAN MATEO	T0608100661	520
	SAN MATEO	T0608100147	520
	CONTRA COSTA	L10009353957	516
	SANTA CLARA	T10000000901	515
	CONTRA COSTA	L10009353957	514
	ALAMEDA	T0600101516	510
	CONTRA COSTA	T10000003609	510
	ALAMEDA	T0600101516	510
	SAN MATEO	W0604100538	510
	CONTRA COSTA	L10009353957	508
	NAPA	W0602800724	500
	SANTA CLARA	SL1821Y617	500
	ALAMEDA	T0600101866	500
	CONTRA COSTA	L10009353957	493
	CONTRA COSTA	L10009353957	491
	ALAMEDA	T0600101410	490
	CONTRA COSTA	T10000003609	490
	MARIN	W0602110007	490
	CONTRA COSTA	L10009353957	489
	ALAMEDA	T0600101486	480
	ALAMEDA	T0600101486	480
	NAPA	W0602800625	480
	SONOMA	W0604910006	480
	ALAMEDA	T0600101410	480
	CONTRA COSTA	L10009353957	477
	SAN MATEO	T0608100661	470
	CONTRA COSTA	SL1823a658	470
	SONOMA	W0604900843	470
	ALAMEDA	T0600100421	470
	CONTRA COSTA	L10009353957	465
	CONTRA COSTA	L10009353957	462
	CONTRA COSTA	L10009353957	460
	CONTRA COSTA	T10000003609	460
	SANTA CLARA	T0608500710	460
	SANTA CLARA	SL1821Y617	460
	ALAMEDA	T0600101410	460
	CONTRA COSTA	T0601300383	459
	SANTA CLARA	T10000000901	452
	CONTRA COSTA	SL18244665	451
	SANTA CLARA	W0604310011	450
	CONTRA COSTA	L10009353957	450
	CONTRA COSTA	L10009353957	448
	MARIN	W0602110501	440
	SAN MATEO	T0608164698	440
	SONOMA	W0604900533	440
	SANTA CLARA	T0608500255	440
	CONTRA COSTA	L10009353957	439
	CONTRA COSTA	L10009353957	431
	SANTA CLARA	W0604310011	430
	SAN MATEO	T0608100661	430
	CONTRA COSTA	T10000003609	430
	SANTA CLARA	W0604310011	420
	ALAMEDA	T0600101410	420
	SANTA CLARA	T0608501548	420
	CONTRA COSTA	L10009353957	416
	SANTA CLARA	SL1821Y617	410
	ALAMEDA	T0600101486	410
	SANTA CLARA	T10000000901	409
	CONTRA COSTA	L10009353957	409
	CONTRA COSTA	L10009353957	404
	ALAMEDA	T06019741226	401
	SANTA CLARA	T0608501140	400
	SANTA CLARA	T10000000901	393
	SONOMA	W0604900843	390
	CONTRA COSTA	T10000003609	390
	SONOMA	W0604900843	390
	SANTA CLARA	W0604310011	390
	CONTRA COSTA	T10000003609	390
	SONOMA	W0604910006	390
	CONTRA COSTA	SL1823a658	384
	SAN MATEO	T0608100661	380
	SAN MATEO	W0604100538	380
	MARIN	T0609592161	370
	SANTA CLARA	W0604310011	370
	MARIN	T0609592162	370
	SAN MATEO	W0604110020	360
	SANTA CLARA	SL1821Y617	360
	SANTA CLARA	L10006514573	360
	CONTRA COSTA	L10009353957	356
	CONTRA COSTA	L10009353957	351
	SONOMA	W0604900562	350
	SAN MATEO	T0608100147	350
	SONOMA	W0604910022	350
	SANTA CLARA	W0604310011	350
	SANTA CLARA	T0608500710	350
	SANTA CLARA	W0604310011	350
	SAN MATEO	W0604100531	340
	ALAMEDA	T0600101410	340
	SONOMA	W0604900563	340
	SAN MATEO	W0604110020	340
	NAPA	W0604900901	340
	CONTRA COSTA	L10009353957	339
	SANTA CLARA	L10006514573	330
	MARIN	W0602110007	330
	SOLANO	W0604800596	330
	SAN MATEO	W0604110011	330
	CONTRA COSTA	L10009353957	329
	SONOMA	W0604910006	320
	SONOMA	W0604901080	320
	NAPA	W0602800555	320
	SANTA CLARA	W0604310011	320
	SANTA CLARA	W0604310011	320
	ALAMEDA	T0600101516	320
	SANTA CLARA	W0604310020	320
	NAPA	W0602801029	320
	CONTRA COSTA	T10000003609	320
	SANTA CLARA	T0608500710	320
	CONTRA COSTA	L10009353957	312
	ALAMEDA	T0600101410	310
	CONTRA COSTA	T10000003609	310
	CONTRA COSTA	T10000003609	310
	SANTA CLARA	W0604300770	310
	ALAMEDA	T0600101410	310
	SANTA CLARA	W0604410016	310
	SANTA CLARA	SL1821Y617	310
	CONTRA COSTA	L10009353957	302
	CONTRA COSTA	SL18244665	301
	SONOMA	W0604910006	300
	MARIN	W0602000573	300
	SANTA CLARA	W0604310011	300
	SAN MATEO	W0604110020	300
	SANTA CLARA	L10006514573	300
	SANTA CLARA	W0604310011	300
	SANTA CLARA	W0604310011	300
	SANTA CLARA	W0604310011	300
	CONTRA COSTA	SL18244665	292
	CONTRA COSTA	SL18244665	291
	MARIN	W0602100519	290
	SAN MATEO	W0604110010	290
	SAN MATEO	T0608100661	290
	SANTA CLARA	T10000000901	288
	CONTRA COSTA	SL18244665	287
	ALAMEDA	T0600101516	280
	SONOMA	W0604900843	280
	SANTA CLARA	W0604310011	280
	SONOMA	W0604910006	280
	CONTRA COSTA	W0600707589	280
	ALAMEDA	W0600110003	280
	SANTA CLARA	W0604310011	280
	SANTA CLARA	W0604300986	270
	CONTRA COSTA	SL18244665	270
	ALAMEDA	T0600101410	270
	SANTA CLARA	W0604310020	270
	SONOMA	W0604910006	270
	SANTA CLARA	W0604300715	270
	SAN MATEO	W0604100538	270
	ALAMEDA	T0600101516	270
	SAN MATEO	T0608100661	270
	CONTRA COSTA	L10009353957	269
	CONTRA COSTA	L10009353957	264
	CONTRA COSTA	L10009353957	262
	SONOMA	T0609700943	260
	SANTA CLARA	T0608500710	260
	SANTA CLARA	W0604310011	260
	SANTA CLARA	W0604310011	260
	ALAMEDA	T0600101410	260
	ALAMEDA	T0600101410	260
	CONTRA COSTA	T10000003609	260
	SANTA CLARA	T10000000901	257
	CONTRA COSTA	L10009353957	253
	SANTA CLARA	SL1821Y617	250
	SANTA CLARA	T0608500710	250
	CONTRA COSTA	T10000003609	250
	MARIN	W0602110501	250
	SANTA CLARA	W0604310011	250
	CONTRA COSTA	SL18244665	248
	SANTA CLARA	W0604300924	242
	SONOMA	W0604910006	240
	SANTA CLARA	T0608500710	240
	SANTA CLARA	T10000000901	240
	SANTA CLARA	W0604310011	240
	SANTA CLARA	T0608500710	240
	CONTRA COSTA	T10000003609	240
	NAPA	W0602810004	240
	SONOMA	W0604910006	240
	CONTRA COSTA	L10009353957	239
	SANTA CLARA	W0604310011	230
	SAN MATEO	W0604110020	230
	SANTA CLARA	T0608500710	230
	SONOMA	W0604910006	230
	SAN MATEO	W0604110020	230
	SONOMA	W0604910006	230
	SANTA CLARA	W0604310011	230
	SANTA CLARA	SL1821Y617	230
	SANTA CLARA	W0604310011	230
	SANTA CLARA	W0604310019	230
	SAN MATEO	W0604100531	227
	CONTRA COSTA	SL1823a658	222
	SAN MATEO	T0608164698	220
	SONOMA	W0604910006	220
	ALAMEDA	L10006224883	220
	SANTA CLARA	SL1821Y617	220
	CONTRA COSTA	T10000003609	220
	SANTA CLARA	SL1821Y617	220
	SANTA CLARA	W0604310011	220
	SAN MATEO	T0608100661	220
	SANTA CLARA	W0604310011	220
	CONTRA COSTA	T10000000666	218
	SAN MATEO	W0604100531	218
	SONOMA	W0604910006	210
	SANTA CLARA	W0604310020	210
	SANTA CLARA	SL1821Y617	210
	SAN MATEO	W0604100531	210
	SANTA CLARA	W0604310011	210
	SANTA CLARA	W0604310011	210
	MARIN	W0602110501	210
	SONOMA	W0604900562	210
	SAN MATEO	T10000001468	210
	MARIN	W0602110501	210
	SAN MATEO	T0608164698	210
	CONTRA COSTA	L10009353957	209
	CONTRA COSTA	L10009353957	209
	CONTRA COSTA	L10009353957	204
	CONTRA COSTA	L10009353957	201
	SANTA CLARA	W0604310001	200.1
	CONTRA COSTA	T10000003609	200
	CONTRA COSTA	T10000003609	200
	SONOMA	W0604900843	200
	SONOMA	W0604900533	200
	CONTRA COSTA	L10009353957	200
	SANTA CLARA	W0604310019	200
	CONTRA COSTA	L10009353957	198
	CONTRA COSTA	L10009353957	195
	CONTRA COSTA	L10009353957	195
	CONTRA COSTA	T0601300383	194
	SAN MATEO	W0604110010	190
	SANTA CLARA	L10006514573	190
	MARIN	T0609592162	190
	NAPA	W0602801008	190
	SANTA CLARA	W0604310011	190
	NAPA	W0602800648	190
	SONOMA	W0604910006	190
	MARIN	T0609592161	190
	SANTA CLARA	W0604310011	190
	MARIN	W0602100565	190
	SANTA CLARA	T10000000901	185
	CONTRA COSTA	L10009353957	185
	SANTA CLARA	T0608500255	182
	CONTRA COSTA	L10009353957	182
	SANTA CLARA	W0604310011	180
	SANTA CLARA	W0604310011	180
	SANTA CLARA	SL1821Y617	180
	ALAMEDA	T0600101516	180
	SANTA CLARA	T0608500710	180
	CONTRA COSTA	T10000003609	180
	SANTA CLARA	W0604310001	180
	SANTA CLARA	W0604310011	180
	SAN MATEO	T0608164698	180
	NAPA	W0602800625	180
	SONOMA	W0604900562	180
	SONOMA	T0609700943	180
	SONOMA	W0604900562	180
	SAN MATEO	W0604110020	180
	SANTA CLARA	L10006514573	180
	ALAMEDA	T0600101516	180
	CONTRA COSTA	L10009353957	175
	CONTRA COSTA	L10009353957	173
	MARIN	W0602110501	170
	SANTA CLARA	W0604310011	170
	ALAMEDA	SL20268886	170
	MARIN	W0602110501	170
	SANTA CLARA	W0604310011	170
	SANTA CLARA	T0608500710	170
	SANTA CLARA	T0608500710	170
	MARIN	T0609592162	170
	MARIN	W0602110501	170
	SONOMA	W0604901080	170
	NAPA	W0602800023	170
	CONTRA COSTA	SL1823a658	170
	SONOMA	W0604900562	170
	MARIN	T0609592161	170
	SANTA CLARA	T0608500710	170
	CONTRA COSTA	T10000003609	170
	CONTRA COSTA	L10009353957	166
	SANTA CLARA	W0604110024	160
	SANTA CLARA	W0604310011	160
	CONTRA COSTA	L10009353957	160
	SANTA CLARA	T0608500710	160
	SAN MATEO	W0604110020	160
	SAN MATEO	W0604110020	160
	SANTA CLARA	SL1821Y617	160
	SAN MATEO	W0604110011	160
	SANTA CLARA	W0604310011	160
	ALAMEDA	T0600101486	160
	SANTA CLARA	SL1821Y617	160
	SANTA CLARA	W0604310011	160
	SAN MATEO	SL0608125065	160
	SANTA CLARA	T0608500710	160
	SANTA CLARA	SL1821Y617	160
	CONTRA COSTA	L10009353957	152
	SAN MATEO	W0604100531	151.9
	SANTA CLARA	W0604310019	150
	SANTA CLARA	W0604310011	150
	SAN MATEO	W0604110010	150
	MARIN	W0602100519	150
	ALAMEDA	T0600101410	150
	MARIN	W0602110501	150
	SONOMA	W0604910006	150
	SANTA CLARA	W0604310011	150
	SANTA CLARA	W0604310011	150
	SANTA CLARA	L10006514573	150
	SANTA CLARA	T0608500710	150
	SANTA CLARA	W0604310020	150
	SANTA CLARA	T10000000901	148
	CONTRA COSTA	L10009353957	143
	SANTA CLARA	T10000000901	143
	SANTA CLARA	W0604310011	140
	SANTA CLARA	W0604310011	140
	SANTA CLARA	W0604410016	140
	SAN MATEO	W0604100510	140
	SANTA CLARA	W0604310011	140
	ALAMEDA	T0600101410	140
	MARIN	W0602110006	140
	SANTA CLARA	W0604310011	140
	SAN MATEO	T0608100147	140
	SAN MATEO	W0604100533	140
	ALAMEDA	T0600101410	140
	CONTRA COSTA	T10000003609	140
	SANTA CLARA	L10006514573	140
	CONTRA COSTA	L10009353957	138
	CONTRA COSTA	SL18244665	137
	CONTRA COSTA	SL18244665	137
	CONTRA COSTA	L10009353957	136
	CONTRA COSTA	SL20210828	136
	CONTRA COSTA	T0601300383	134
	SANTA CLARA	T10000000901	133
	CONTRA COSTA	SL20210828	132
	NAPA	W0602801008	130
	MARIN	W0602100565	130
	SANTA CLARA	L10006514573	130
	SANTA CLARA	W0604310011	130
	SONOMA	W0604910006	130
	SONOMA	W0604900843	130
	CONTRA COSTA	T10000003609	130
	ALAMEDA	T10000003434	130
	SONOMA	W0604901144	130
	SAN MATEO	W0604100510	130
	MARIN	W0602110006	130
	ALAMEDA	T0600101486	130
	SANTA CLARA	T0608500710	130
	NAPA	W0602810001	130
	SANTA CLARA	W0604310011	130
	SAN MATEO	W0604110020	130
	SANTA CLARA	T10000000901	127
	CONTRA COSTA	L10009353957	125
	CONTRA COSTA	SL20210828	125
	MARIN	W0602110501	120
	SANTA CLARA	W0604310011	120
	SANTA CLARA	W0604410016	120
	SANTA CLARA	W0604310011	120
	SONOMA	W0604901355	120
	SAN MATEO	W0604110020	120
	SANTA CLARA	T0608500710	120
	SONOMA	W0604900533	120
	SONOMA	W0604910012	120
	SAN MATEO	W0604110020	120
	SANTA CLARA	T0608500710	120
	MARIN	W0602110501	120
	SANTA CLARA	W0604310019	120
	SANTA CLARA	W0604310011	120
	SONOMA	T0609700788	120
	SANTA CLARA	W0604310011	120
	CONTRA COSTA	T10000003609	120
	SANTA CLARA	L10006514573	120
	SAN MATEO	SL0608125065	120
	CONTRA COSTA	SL18316736	120
	SANTA CLARA	W0604310011	120
	SANTA CLARA	T0608500710	120
	SANTA CLARA	W0604310011	120
	SANTA CLARA	W0604310011	120
	ALAMEDA	T0600101410	120
	CONTRA COSTA	SL18244665	112
	CONTRA COSTA	L10009353957	111
	MARIN	W0602110501	110
	MARIN	W0602110501	110
	SANTA CLARA	W0604310019	110
	SANTA CLARA	W0604310019	110
	SANTA CLARA	W0604310011	110
	SONOMA	W0604900533	110
	SONOMA	W0604910006	110
	SANTA CLARA	W0604310011	110
	SANTA CLARA	SL1821Y617	110
	SAN MATEO	W0604100533	110
	NAPA	W0602800525	110
	SANTA CLARA	W0604310019	110
	CONTRA COSTA	T10000003609	110
	ALAMEDA	T0600101516	110
	MARIN	W0602110501	110
	SANTA CLARA	W0604310011	110
	SANTA CLARA	W0604310011	110
	SANTA CLARA	W0604310011	110
	MARIN	W0602110501	110
	SANTA CLARA	W0604310011	110
	ALAMEDA	T0600101486	110
	SANTA CLARA	SL1821Y617	110
	SANTA CLARA	W0604310011	110
	SANTA CLARA	W0604310013	110
	SANTA CLARA	SL1821Y617	110
	SANTA CLARA	SL1823F1131	106
	SANTA CLARA	T0608553115	104
	SANTA CLARA	T10000000901	102
	SONOMA	W0604900562	100
	SANTA CLARA	W0604310011	100
	SANTA CLARA	W0604310011	100
	SANTA CLARA	W0604310011	100
	SANTA CLARA	W0604310011	100
	SANTA CLARA	W0604310011	100
	SONOMA	W0604910022	100
	ALAMEDA	W0600110001	100
	ALAMEDA	W0600110001	100
	ALAMEDA	W0600110001	100
	ALAMEDA	W0600110001	100
	SANTA CLARA	W0604310011	100
	ALAMEDA	W0600110001	100
	SANTA CLARA	W0604310012	100
	SANTA CLARA	W0604310012	100
	SANTA CLARA	W0604300986	100
	SANTA CLARA	W0604310011	100
	SANTA CLARA	W0604310011	100
	SAN MATEO	W0604110019	100
	ALAMEDA	W0600110001	100
	NAPA	W0602800625	100
	NAPA	W0602800625	100
	NAPA	W0602800625	100
	NAPA	W0602800625	100
	SANTA CLARA	W0604310011	100
	SANTA CLARA	W0604310011	100
	SANTA CLARA	W0604310011	100
	SONOMA	W0604900562	100
	NAPA	W0602801024	100
	ALAMEDA	W0600110001	100
	ALAMEDA	W0600110001	100
	MARIN	W0602110501	100
	MARIN	W0602110501	100
	MARIN	W0602110006	100
	SANTA CLARA	W0604310011	100
	SANTA CLARA	W0604310011	100
	NAPA	W0602800625	100
	ALAMEDA	W0600110001	100
	ALAMEDA	W0600110001	100
	ALAMEDA	W0600110001	100
	SANTA CLARA	W0604310011	100
	SANTA CLARA	W0604310012	100
	SONOMA	W0604900843	100
	SAN MATEO	W0604100531	100
	SANTA CLARA	W0604310011	100
	SANTA CLARA	W0604310011	100
	ALAMEDA	W0600110001	100
	ALAMEDA	W0600110001	100
	SANTA CLARA	W0604310011	100
	SANTA CLARA	W0604310011	100
	SANTA CLARA	W0604310012	100
	SANTA CLARA	W0604300986	100
	SANTA CLARA	W0604310011	100
	NAPA	W0602800625	100
	NAPA	W0602800625	100
	NAPA	W0602800625	100
	SANTA CLARA	W0604310011	100
	SANTA CLARA	W0604310011	100
	ALAMEDA	W0600110001	100
	ALAMEDA	W0600110001	100
	MARIN	W0602110501	100
	SANTA CLARA	W0604310007	100
	SANTA CLARA	W0604310011	100
	SANTA CLARA	W0604310011	100
	NAPA	W0602810004	100
	NAPA	W0602810012	100
	ALAMEDA	W0600110001	100
	ALAMEDA	W0600110001	100
	SANTA CLARA	W0604310012	100
	SONOMA	W0604900843	100
	SANTA CLARA	W0604310011	100
	NAPA	W0602800528	100
	MARIN	W0602110008	100
	SANTA CLARA	W0604310011	100
	SANTA CLARA	W0604310011	100
	ALAMEDA	W0600110001	100
	ALAMEDA	W0600110001	100
	ALAMEDA	W0600110001	100
	SANTA CLARA	W0604310011	100
	SANTA CLARA	W0604310005	100
	SONOMA	W0604900973	100
	ALAMEDA	W0600110001	100
	NAPA	W0602800625	100
	CONTRA COSTA	W0600710002	100
	ALAMEDA	W0600110001	100
	ALAMEDA	W0600110001	100
	SANTA CLARA	W0604310012	100
	SANTA CLARA	W0604310020	100
	MARIN	W0602110501	100
	MARIN	W0602110501	100
	MARIN	W0602110501	100
	SANTA CLARA	W0604310011	100
	SANTA CLARA	W0604310011	100
	SANTA CLARA	W0604310011	100
	SANTA CLARA	W0604310011	100
	SANTA CLARA	W0604310011	100
	SANTA CLARA	W0604310011	100
	SANTA CLARA	W0604310011	100
	SANTA CLARA	W0604310011	100
	SANTA CLARA	W0604310011	100
	ALAMEDA	W0600110001	100
	ALAMEDA	W0600110001	100
	NAPA	W0602810012	100
	ALAMEDA	W0600110001	100
	CONTRA COSTA	W0600707547	100
	SANTA CLARA	W0604310011	100
	SANTA CLARA	W0604310011	100
	SANTA CLARA	W0604310011	100
	SANTA CLARA	W0604310020	100
	SANTA CLARA	W0604300986	100
	MARIN	W0602110006	100
	SANTA CLARA	W0604310020	100
	NAPA	W0602800625	100
	NAPA	W0602810012	100
	SANTA CLARA	W0604310011	100
	ALAMEDA	W0600110001	100
	MARIN	W0602110501	100
	MARIN	W0602110501	100
	SANTA CLARA	W0604310007	100
	SANTA CLARA	W0604310011	100
	SANTA CLARA	W0604310011	100
	SANTA CLARA	W0604310011	100
	SANTA CLARA	W0604310011	100
	SANTA CLARA	W0604310011	100
	NAPA	W0602810012	100
	NAPA	W0602810004	100
	ALAMEDA	W0600110001	100
	ALAMEDA	W0600110001	100
	ALAMEDA	W0600110001	100
	ALAMEDA	W0600110001	100
	SONOMA	W0604900973	100
	SONOMA	W0604901062	100
	SONOMA	W0604900843	100
	SONOMA	W0604900843	100
	NAPA	W0602800532	100
	MARIN	W0602100519	100
	SONOMA	W0604910025	100
	ALAMEDA	W0600110001	100
	ALAMEDA	W0600110001	100
	SANTA CLARA	W0604310012	100
	NAPA	W0602801009	100
	NAPA	W0602800625	100
	NAPA	W0602800625	100
	SANTA CLARA	W0604310011	100
	SONOMA	W0604900563	100
	ALAMEDA	W0600110001	100
	SANTA CLARA	W0604310013	100
	NAPA	W0602800032	100
	MARIN	W0602110501	100
	SANTA CLARA	W0604310011	100
	SANTA CLARA	W0604310011	100
	SANTA CLARA	W0604310011	100
	ALAMEDA	W0600110001	100
	ALAMEDA	W0600110001	100
	ALAMEDA	W0600110001	100
	ALAMEDA	W0600110001	100
	SAN MATEO	W0604110019	100
	ALAMEDA	W0600110001	100
	ALAMEDA	W0600110001	100
	ALAMEDA	W0600110001	100
	SANTA CLARA	W0604310012	100
	SONOMA	W0604900843	100
	SANTA CLARA	W0604310020	100
	SAN MATEO	W0604100555	100
	NAPA	W0602800625	100
	NAPA	W0602800625	100
	NAPA	W0602800625	100
	SANTA CLARA	W0604310012	100
	ALAMEDA	W0600110001	100
	SANTA CLARA	W0604310011	100
	SANTA CLARA	W0604310011	100
	SONOMA	W0604910006	100
	ALAMEDA	W0600110001	100
	MARIN	W0602110501	100
	MARIN	W0602110501	100
	SANTA CLARA	W0604310011	100
	SANTA CLARA	W0604310011	100
	SANTA CLARA	W0604310011	100
	SANTA CLARA	W0604310011	100
	ALAMEDA	W0600110001	100
	SONOMA	W0604910025	100
	NAPA	W0602800625	100
	ALAMEDA	W0600110001	100
	CONTRA COSTA	W0600710002	100
	SONOMA	W0604901355	100
	MARIN	W0602100565	100
	SANTA CLARA	W0604310019	100
	SANTA CLARA	W0604310020	100
	SONOMA	W0604900563	100
	MARIN	W0602110008	100
	ALAMEDA	W0600110001	100
	ALAMEDA	W0600110001	100
	ALAMEDA	W0600110001	100
	SANTA CLARA	W0604310012	100
	SANTA CLARA	W0604300986	100
	SANTA CLARA	W0604310019	100
	NAPA	W0602801003	100
	SANTA CLARA	W0604310011	100
	NAPA	W0602800625	100
	NAPA	W0602800625	100
	SANTA CLARA	W0604310011	100
	SANTA CLARA	W0604310011	100
	MARIN	W0603301046	100
	SAN MATEO	W0604100531	100
	ALAMEDA	W0600110001	100
	MARIN	W0602110006	100
	SONOMA	W0604900562	100
	SANTA CLARA	W0604310011	100
	SANTA CLARA	W0604310011	100
	SANTA CLARA	W0604310011	100
	SANTA CLARA	W0604310011	100
	SANTA CLARA	W0604310011	100
	SANTA CLARA	W0604310011	100
	ALAMEDA	W0600110001	100
	ALAMEDA	W0600110001	100
	SONOMA	W0604900533	100
	SANTA CLARA	W0604310012	100
	SONOMA	W0604900843	100
	SANTA CLARA	W0604310013	100
	NAPA	W0602801012	100
	SONOMA	W0604901144	100
	SANTA CLARA	W0604310011	100
	SANTA CLARA	W0604310011	100
	ALAMEDA	W0600110001	100
	ALAMEDA	W0600110001	100
	ALAMEDA	W0600110001	100
	ALAMEDA	W0600110001	100
	ALAMEDA	W0600110001	100
	ALAMEDA	W0600110001	100
	ALAMEDA	W0600110001	100
	SANTA CLARA	W0604310012	100
	SANTA CLARA	W0604310011	100
	SANTA CLARA	W0604310011	100
	NAPA	W0602800625	100
	NAPA	W0602800625	100
	NAPA	W0602800625	100
	SANTA CLARA	W0604310011	100
	ALAMEDA	W0600110001	100
	ALAMEDA	W0600110001	100
	ALAMEDA	W0600110001	100
	MARIN	W0603301046	100
	SANTA CLARA	W0604310011	100
	CONTRA COSTA	W0600710002	100
	SAN MATEO	W0604100531	100
	CONTRA COSTA	T10000003609	97
	SANTA CLARA	T10000000901	93.1
	SANTA CLARA	L10006514573	89
	SANTA CLARA	T10000000901	89
	CONTRA COSTA	T10000003609	88
	ALAMEDA	SL0600100443	86.8
	SAN MATEO	W0604110020	86
	SANTA CLARA	L10006514573	85
	SAN MATEO	W0604110020	82
	SANTA CLARA	T0608500255	81.8
	CONTRA COSTA	SL18244665	80.8
	SONOMA	W0604900563	80
	CONTRA COSTA	L10009353957	78.9
	ALAMEDA	SL0600100443	78.7
	CONTRA COSTA	SL18244665	78.1
	CONTRA COSTA	SL18244665	74
	ALAMEDA	T0600101516	73
	SAN MATEO	T0608100147	73
	SAN MATEO	W0604110020	71
	SANTA CLARA	T10000000901	70.9
	CONTRA COSTA	SL18244665	70
	CONTRA COSTA	SL18244665	69.6
	CONTRA COSTA	SL18244665	68.2
	NO COUNTY FOUND	L10006224883	68
	ALAMEDA	T0600101516	67
	MARIN	W0602110007	66.86
	SANTA CLARA	W0604410016	66
	SANTA CLARA	L10006514573	66
	CONTRA COSTA	T10000000666	65
	NAPA	W0602702521	65
	SANTA CLARA	T0608509697	64.5
	NO COUNTY FOUND	L10006224883	64
	SANTA CLARA	L10006514573	63
	ALAMEDA	T0600101803	63
	SANTA CLARA	L10006514573	63
	SANTA CLARA	T0608509697	62.2
	ALAMEDA	T0600101516	61
	SANTA CLARA	T10000000901	60.9
	CONTRA COSTA	L10009353957	60.5
	CONTRA COSTA	T10000003609	60
	SAN MATEO	SL0608125065	59
	SAN MATEO	W0604110020	59
	SANTA CLARA	T10000000901	56.1
	ALAMEDA	T0600101486	56
	SANTA CLARA	L10006514573	55
	SANTA CLARA	L10006514573	55
	NO COUNTY FOUND	L10006224883	54
	SANTA CLARA	W0604300740	51
	CONTRA COSTA	SL18244665	50.4
	SANTA CLARA	W0604310011	50
	SANTA CLARA	L10006514573	50
	SANTA CLARA	W0604310001	49.77
	ALAMEDA	W0600110003	48.99
	CONTRA COSTA	SL18244665	48.6
	SANTA CLARA	L10006514573	46
	SANTA CLARA	T0608509697	46
	NO COUNTY FOUND	L10006224883	46
	SANTA CLARA	T10000004547	45
	SANTA CLARA	W0604310001	44.7
	SANTA CLARA	T0608500255	42
	SANTA CLARA	L10006514573	41
	CONTRA COSTA	SL18244665	40.4
	CONTRA COSTA	T10000003609	40
	SAN MATEO	SL0608125065	40
	CONTRA COSTA	L10009353957	39.5
	SANTA CLARA	T10000000901	39.2
	CONTRA COSTA	L10009353957	38.9
	SAN MATEO	SL0608125065	38
	SANTA CLARA	W0604310001	37.22
	SANTA CLARA	W0604310001	36.33
	CONTRA COSTA	SL18244665	36.1
	SANTA CLARA	L10006514573	36
	CONTRA COSTA	SL18244665	36
	SANTA CLARA	L10006514573	36
	CONTRA COSTA	SL18244665	35.6
	SANTA CLARA	W0604310006	35
	SANTA CLARA	L10006514573	33
	SANTA CLARA	L10006514573	33
	SANTA CLARA	W0604310001	31.55
	SANTA CLARA	W0604310001	31.02
	SANTA CLARA	T10000000901	31
	SAN MATEO	W0604110020	30
	SANTA CLARA	T10000000901	30
	ALAMEDA	L10005834311	25
	SAN MATEO	SL0608125065	25
	SANTA CLARA	T10000000901	23.9
	ALAMEDA	W0600110003	23.29
	SANTA CLARA	T10000000901	22.3
	SANTA CLARA	T10000000901	21.5
	SANTA CLARA	T10000000901	20.9
	SAN MATEO	W0604110009	19.3
	MARIN	W0602110007	18.32
	SAN MATEO	W0604110009	18.11
	SANTA CLARA	W0604310001	18.06
	SANTA CLARA	T10000000901	17.7
	SANTA CLARA	T10000000901	16.9
	MARIN	W0602110007	14.65
	SAN MATEO	W0604110009	14.32
	SAN MATEO	W0604110009	14.16
	SAN MATEO	W0604110009	14.08
	SAN MATEO	W0604110009	13.73
	SAN MATEO	W0604110009	13.31
	SANTA CLARA	T0608553115	12.9
	SAN MATEO	W0604110009	12.59
	SANTA CLARA	T10000000901	12
	SAN MATEO	W0604110009	11.92
	SAN MATEO	W0604110009	11.76
	SAN MATEO	W0604110009	11.45
	SANTA CLARA	T10000000901	11.2
	SANTA CLARA	T10000000901	10.8
	SANTA CLARA	T10000000901	10.7
	SANTA CLARA	T10000000901	10.5
	SAN MATEO	W0604110009	10.3
	SANTA CLARA	W0604310006	10
	SAN MATEO	W0604110009	9.794
	SAN MATEO	W0604110009	9.48
	SAN MATEO	W0604110009	8.644
	SAN MATEO	W0604110009	8.404
	SANTA CLARA	T10000000901	7.4
	SAN MATEO	W0604110009	7.087
	SAN MATEO	W0604110009	6.856
	MARIN	W0602110007	6.799
	SANTA CLARA	T10000000901	6.73
	SANTA CLARA	W0604310001	6.71
	SANTA CLARA	T10000000901	6.16
	SAN MATEO	W0604110009	5.278
	MARIN	W0602110007	5.251
	MARIN	W0602110007	5.103
	MARIN	W0602110007	5.098
	MARIN	W0602110007	5.028
	SANTA CLARA	T10000000901	4.89
	SANTA CLARA	T10000000901	4.58
	ALAMEDA	W0600110003	4.329
	SAN MATEO	W0604110009	4.172
	SAN MATEO	W0604110009	3.972
	MARIN	W0602110007	3.926
	SANTA CLARA	T10000000901	3.51
	SANTA CLARA	T10000000901	3.18
	SANTA CLARA	W0604310001	3.167
	MARIN	W0602110007	3.147
	SAN MATEO	W0604110009	2.6
	MARIN	W0602110007	1.977
	SANTA CLARA	T10000000901	1.83
	MARIN	W0602110007	1.715
	SANTA CLARA	T10000000901	1.71
	MARIN	W0602110007	1.675
	MARIN	W0602110007	1.611
	MARIN	W0602110007	1.595
	SANTA CLARA	T10000000901	1.54
	SANTA CLARA	T10000000901	1.53
	MARIN	W0602110007	1.152
	MARIN	W0602110007	1.046
	ALAMEDA	W0600110003	0.802
	SAN MATEO	W0604110009	0.673
	MARIN	W0602110006	0.34
	SAN MATEO	W0604110009	0.328
	MARIN	W0602110006	0.235
	MARIN	W0602110006	0.184
	SONOMA	W0604900875	0.16
	MARIN	W0602110006	0.15
	MARIN	W0602110006	0.111
	MARIN	W0602110006	0.103
	SAN MATEO	W0604110009	0.071
	MARIN	W0602110501	0
	MARIN	W0602110006	0
	SAN MATEO	W0604110013	0
	SAN MATEO	W0604110010	0
	SANTA CLARA	W0604310011	0
	SONOMA	W0604910012	0
	SONOMA	W0604910013	0
	SAN MATEO	W0604110020	0
	NAPA	W0602801008	0
	SONOMA	W0604910012	0
	SONOMA	W0604910012	0
	ALAMEDA	W0600110010	0
	SANTA CLARA	W0604310011	0
	SANTA CLARA	SL1821Y617	0
	SANTA CLARA	T10000000901	0
	SANTA CLARA	L10006514573	0
	SANTA CLARA	L10006514573	0
	MARIN	T0609592161	0
	ALAMEDA	SL0600106796	0
	SANTA CLARA	T0608501548	0
	ALAMEDA	T0600101516	0
	SAN MATEO	T0608164698	0
	SANTA CLARA	L10006514573	0
	SAN MATEO	SL0608125065	0
	CONTRA COSTA	SL18244665	0
	SAN MATEO	T0608100661	0
	MARIN	T0609592161	0
	ALAMEDA	T0600101516	0
	SAN MATEO	T10000001468	0
	CONTRA COSTA	SL20210828	0
	MARIN	T0609592161	0
	SAN MATEO	T0608164698	0
	SANTA CLARA	W0604300986	0
	SAN MATEO	W0604110020	0
	ALAMEDA	W0604300856	0
	NAPA	W0602800516	0
	ALAMEDA	T0600101016	0
	MARIN	T0609592162	0
	SANTA CLARA	L10006514573	0
	SANTA CLARA	L10006514573	0
	CONTRA COSTA	L10009353957	0
	CONTRA COSTA	L10009353957	0
	SANTA CLARA	SL1821Y617	0
	SANTA CLARA	SL1821Y617	0
	SANTA CLARA	L10006514573	0
	SONOMA	T0609700788	0
	ALAMEDA	T0600101410	0
	SANTA CLARA	T0608500710	0
	SANTA CLARA	T0608500710	0
	SANTA CLARA	T0608501548	0
	SANTA CLARA	L10006514573	0
	SANTA CLARA	L10006514573	0
	SANTA CLARA	L10006514573	0
	CONTRA COSTA	L10009353957	0
	CONTRA COSTA	L10009353957	0
	CONTRA COSTA	L10009353957	0
	CONTRA COSTA	L10009353957	0
	SANTA CLARA	T0608500710	0
	SANTA CLARA	T0608500710	0
	SANTA CLARA	T0608500710	0
	SANTA CLARA	T0608500710	0
	ALAMEDA	W0600110010	0
	MARIN	W0602110007	0
	SAN MATEO	W0604110013	0
	SAN MATEO	W0604110013	0
	MARIN	W0602110007	0
	SANTA CLARA	W0604310011	0
	MARIN	W0602110007	0
	MARIN	W0602110007	0
	MARIN	W0602110007	0
	NAPA	W0602801016	0
	SANTA CLARA	T0608500710	0
	SANTA CLARA	T0608500710	0
	ALAMEDA	T0600101803	0
	SANTA CLARA	L10006514573	0
	SAN MATEO	SL0608125065	0
	ALAMEDA	W0600110010	0
	ALAMEDA	W0600110003	0
	SAN MATEO	SL0608125065	0
	SANTA CLARA	T0608500710	0
	SANTA CLARA	T0608500710	0
	NAPA	W0602801041	0
	ALAMEDA	T0600101486	0
[truncated: 608 more rows]

## Sheet: Sheet2
DATE	COUNTY	RESULT
2014-08-21	CONTRA COSTA	950000		9931.35	43259.8
2015-01-05	CONTRA COSTA	714000
2014-10-15	SAN MATEO	690000
2015-09-23	CONTRA COSTA	510000
2015-01-05	CONTRA COSTA	488000
2014-10-07	CONTRA COSTA	470000
2014-07-08	SAN MATEO	450000
2014-08-21	CONTRA COSTA	410000
2014-06-19	ALAMEDA	370000
2014-07-08	SAN MATEO	370000
2015-01-14	SAN MATEO	350000
2014-08-21	CONTRA COSTA	340000
2014-08-20	SANTA CLARA	270000
2015-07-22	SAN MATEO	260000
2015-05-06	SAN MATEO	250000
2015-04-09	SANTA CLARA	240000
2015-02-16	CONTRA COSTA	233000
2015-01-14	SAN MATEO	210000
2014-10-15	SAN MATEO	200000
2014-11-07	SAN MATEO	200000
2015-04-08	CONTRA COSTA	191000
2014-04-17	SAN MATEO	190000
2015-04-10	SAN MATEO	180000
2014-07-09	SAN MATEO	180000
2014-08-21	CONTRA COSTA	180000
2014-11-07	SAN MATEO	160000
2016-01-14	SAN MATEO	160000
2014-01-13	SAN MATEO	160000
2015-04-08	CONTRA COSTA	160000
2015-03-20	CONTRA COSTA	152000
2014-02-27	CONTRA COSTA	150000
2014-08-21	CONTRA COSTA	150000
2014-04-17	SAN MATEO	140000
2015-04-08	CONTRA COSTA	134000
2014-04-17	SAN MATEO	130000
2014-07-09	SAN MATEO	130000
2014-07-09	SAN MATEO	130000
2014-01-02	SAN MATEO	130000
2015-02-16	CONTRA COSTA	122000
2014-01-14	SAN MATEO	120000
2014-11-07	SAN MATEO	120000
2015-04-09	SANTA CLARA	120000
2015-10-21	CONTRA COSTA	117000
2015-05-13	CONTRA COSTA	114000
2015-07-13	CONTRA COSTA	112000
2015-05-13	CONTRA COSTA	111000
2014-04-18	SAN MATEO	110000
2014-06-25	ALAMEDA	110000
2014-10-20	CONTRA COSTA	102000
2014-04-17	SAN MATEO	100000
2015-05-13	CONTRA COSTA	98800
2015-04-29	CONTRA COSTA	98600
2014-08-11	CONTRA COSTA	97700
2016-03-02	SANTA CLARA	97000
2014-01-31	SANTA CLARA	96800
2015-03-20	CONTRA COSTA	95400
2016-05-09	ALAMEDA	94000
2015-04-09	SANTA CLARA	93000
2014-11-07	SAN MATEO	90000
2015-05-13	CONTRA COSTA	89900
2015-05-13	CONTRA COSTA	89400
2014-08-21	CONTRA COSTA	89000
2015-04-08	CONTRA COSTA	88400
2015-04-23	CONTRA COSTA	88400
2015-04-23	CONTRA COSTA	88000
2014-10-15	SAN MATEO	87000
2015-05-06	SAN MATEO	86000
2014-08-21	CONTRA COSTA	86000
2015-07-22	SAN MATEO	86000
2014-08-21	CONTRA COSTA	83000
2015-06-22	CONTRA COSTA	82900
2015-04-08	CONTRA COSTA	82900
2014-08-21	CONTRA COSTA	82000
2015-02-11	ALAMEDA	82000
2014-08-21	CONTRA COSTA	81000
2014-07-08	SAN MATEO	81000
2014-06-18	SONOMA	81000
2015-11-10	ALAMEDA	81000
2015-02-11	ALAMEDA	81000
2015-02-16	CONTRA COSTA	80500
2014-11-06	SONOMA	80000
2015-02-11	ALAMEDA	80000
2014-01-14	SAN MATEO	79000
2014-11-06	SONOMA	78000
2014-04-30	CONTRA COSTA	77400
2015-05-28	CONTRA COSTA	74900
2014-06-25	ALAMEDA	73000
2015-01-13	SAN MATEO	72000
2014-07-08	SAN MATEO	72000
2015-05-13	CONTRA COSTA	70100
2015-05-28	CONTRA COSTA	69600
2015-04-08	CONTRA COSTA	69500
2015-09-16	CONTRA COSTA	68700
2014-03-21	SONOMA	68000
2013-12-13	SONOMA	68000
2014-07-09	SAN MATEO	68000
2014-09-16	CONTRA COSTA	67400
2015-02-16	CONTRA COSTA	67300
2014-10-15	SAN MATEO	66000
2015-09-16	SAN MATEO	65700
2015-02-05	ALAMEDA	65000
2015-02-16	CONTRA COSTA	65000
2015-06-22	CONTRA COSTA	62800
2015-04-08	CONTRA COSTA	62100
2015-04-23	CONTRA COSTA	61600
2014-04-17	SAN MATEO	61000
2016-07-18	MARIN	60000
2014-01-02	SAN MATEO	59000
2015-04-23	CONTRA COSTA	58100
2015-01-14	SAN MATEO	58000
2015-07-14	SAN MATEO	57000
2015-02-16	CONTRA COSTA	56700
2015-04-23	CONTRA COSTA	56600
2015-08-26	SANTA CLARA	56100
2014-10-15	SAN MATEO	56000
2015-08-03	SANTA CLARA	55900
2014-08-29	ALAMEDA	54000
2014-06-26	ALAMEDA	54000
2014-08-21	CONTRA COSTA	54000
2015-02-16	CONTRA COSTA	53600
2015-05-06	SAN MATEO	53000
2014-08-21	CONTRA COSTA	52000
2014-02-05	ALAMEDA	52000
2015-04-09	SANTA CLARA	52000
2015-04-23	CONTRA COSTA	51800
2015-03-20	CONTRA COSTA	51200
2015-11-10	ALAMEDA	50000
2015-07-14	SAN MATEO	50000
2014-03-13	SAN MATEO	49000
2015-07-22	SAN MATEO	49000
2015-05-13	CONTRA COSTA	48900
2014-03-19	SANTA CLARA	48000
2014-04-17	SAN MATEO	48000
2015-01-14	SAN MATEO	48000
2015-01-14	SAN MATEO	48000
2015-04-08	CONTRA COSTA	47500
2015-04-09	SANTA CLARA	47000
2015-06-15	SANTA CLARA	47000
2015-05-28	CONTRA COSTA	46600
2014-04-17	SAN MATEO	46000
2014-10-15	SAN MATEO	46000
2015-08-10	ALAMEDA	46000
2015-02-16	CONTRA COSTA	46000
2015-05-28	CONTRA COSTA	45600
2015-04-09	SANTA CLARA	45000
2015-04-08	CONTRA COSTA	44400
2014-06-26	ALAMEDA	44000
2015-04-08	CONTRA COSTA	43200
2015-04-23	CONTRA COSTA	43100
2015-11-10	ALAMEDA	43000
2014-06-25	ALAMEDA	43000
2014-11-14	MARIN	43000
2014-11-14	MARIN	43000
2015-05-28	CONTRA COSTA	42100
2016-06-06	SONOMA	42000
2014-06-26	ALAMEDA	42000
2015-07-21	SAN MATEO	42000
2014-01-14	SAN MATEO	42000
2015-05-28	CONTRA COSTA	41600
2015-02-16	CONTRA COSTA	41600
2015-02-16	CONTRA COSTA	41400
2013-12-13	SONOMA	41000
2014-01-13	SAN MATEO	41000
2015-04-23	CONTRA COSTA	40200
2015-02-16	CONTRA COSTA	40000
2015-08-10	ALAMEDA	40000
2014-01-31	SANTA CLARA	38300
2015-07-21	SAN MATEO	38000
2014-04-17	SAN MATEO	38000
2015-08-10	ALAMEDA	38000
2014-01-02	SAN MATEO	37000
2013-12-13	SONOMA	37000
2016-01-14	SAN MATEO	36000
2014-06-18	SONOMA	36000
2015-04-23	CONTRA COSTA	35900
2015-03-20	CONTRA COSTA	35900
2015-05-28	CONTRA COSTA	35600
2015-02-16	CONTRA COSTA	35600
2015-05-13	CONTRA COSTA	35300
2015-01-28	CONTRA COSTA	35200
2014-06-25	ALAMEDA	35000
2015-03-20	CONTRA COSTA	34500
2016-05-09	ALAMEDA	34000
2014-06-18	SONOMA	34000
2015-10-21	SAN MATEO	33000
2015-02-26	SONOMA	32000
2014-01-14	SAN MATEO	32000
2015-05-13	CONTRA COSTA	31400
2015-05-13	CONTRA COSTA	31400
2014-06-25	ALAMEDA	31000
2016-07-19	ALAMEDA	31000
2016-01-13	SAN MATEO	31000
2014-11-06	SONOMA	31000
2014-04-29	SAN MATEO	31000
2015-05-28	CONTRA COSTA	30200
2015-05-06	SAN MATEO	30000
2015-10-02	ALAMEDA	30000
2015-02-11	ALAMEDA	30000
2014-01-23	CONTRA COSTA	29800
2014-08-27	CONTRA COSTA	29300
2014-10-14	SAN MATEO	29000
2015-08-11	ALAMEDA	29000
2015-08-10	ALAMEDA	29000
2015-02-11	ALAMEDA	29000
2015-02-16	CONTRA COSTA	28700
2015-03-20	CONTRA COSTA	28400
2014-06-26	ALAMEDA	28000
2015-02-05	ALAMEDA	28000
2014-10-03	ALAMEDA	28000
2014-02-19	SAN MATEO	28000
2015-03-03	SAN MATEO	28000
2014-10-15	SAN MATEO	28000
2015-05-07	SAN MATEO	27000
2015-02-11	ALAMEDA	27000
2014-04-18	SAN MATEO	27000
2013-12-06	SAN MATEO	27000
2015-08-10	ALAMEDA	27000
2014-10-03	ALAMEDA	27000
2014-10-03	ALAMEDA	27000
2015-04-08	CONTRA COSTA	26900
2015-04-08	CONTRA COSTA	26300
2014-06-19	ALAMEDA	26000
2015-02-11	ALAMEDA	26000
2016-05-09	ALAMEDA	25000
2014-10-09	ALAMEDA	25000
2015-01-15	SAN MATEO	25000
2015-02-05	ALAMEDA	25000
2016-04-14	SAN MATEO	25000
2015-03-25	SAN MATEO	24200
2014-06-19	ALAMEDA	24000
2014-02-27	CONTRA COSTA	24000
2014-08-29	ALAMEDA	24000
2015-08-17	ALAMEDA	24000
2015-11-10	ALAMEDA	24000
2014-11-14	MARIN	24000
2014-11-14	MARIN	24000
2014-05-28	CONTRA COSTA	23700
2015-05-28	CONTRA COSTA	23700
2016-06-06	SONOMA	23000
2016-04-14	SAN MATEO	23000
2014-06-26	ALAMEDA	23000
2015-05-07	SAN MATEO	23000
2014-06-19	ALAMEDA	23000
2015-11-10	ALAMEDA	23000
2015-04-23	CONTRA COSTA	22900
2015-04-09	CONTRA COSTA	22800
2015-04-09	SAN MATEO	22800
2014-10-03	ALAMEDA	22000
2014-02-05	ALAMEDA	22000
2014-10-03	ALAMEDA	22000
2014-05-28	CONTRA COSTA	21600
2015-05-28	CONTRA COSTA	21500
2014-06-25	ALAMEDA	21000
2015-09-16	SAN MATEO	20900
2015-06-18	ALAMEDA	20000
2014-06-19	ALAMEDA	20000
2013-12-30	CONTRA COSTA	20000
2014-11-07	SAN MATEO	20000
2014-08-29	ALAMEDA	20000
2016-01-06	ALAMEDA	19000
2014-01-13	SAN MATEO	19000
2014-03-26	SAN MATEO	19000
2014-03-12	SAN MATEO	19000
2014-06-19	ALAMEDA	19000
2013-12-13	SONOMA	19000
2015-05-28	CONTRA COSTA	18900
2015-02-16	CONTRA COSTA	18400
2014-11-14	MARIN	18000
2013-12-05	SAN MATEO	18000
2014-11-07	SAN MATEO	18000
2016-07-19	NO COUNTY FOUND	18000
2014-11-14	MARIN	18000
2015-07-20	CONTRA COSTA	18000
2014-11-07	SAN MATEO	18000
2014-11-07	SAN MATEO	18000
2014-11-07	SONOMA	18000
2015-03-20	CONTRA COSTA	17800
2015-07-20	CONTRA COSTA	17400
2016-02-25	SANTA CLARA	17300
2015-05-28	CONTRA COSTA	17200
2014-07-10	SAN MATEO	17000
2016-07-19	ALAMEDA	17000
2015-02-26	SONOMA	17000
2015-06-18	ALAMEDA	17000
2014-03-13	SAN MATEO	17000
2015-09-16	SAN MATEO	16700
2015-04-08	CONTRA COSTA	16400
2014-08-29	ALAMEDA	16000
2015-02-11	ALAMEDA	16000
2014-01-02	SAN MATEO	16000
2015-06-04	SANTA CLARA	16000
2015-09-15	CONTRA COSTA	15200
2015-06-22	CONTRA COSTA	15200
2014-09-16	CONTRA COSTA	15100
2015-04-09	SANTA CLARA	15000
2015-06-18	ALAMEDA	15000
2014-06-19	ALAMEDA	15000
2015-04-23	CONTRA COSTA	15000
2016-01-13	SAN MATEO	15000
2014-02-13	SAN MATEO	15000
2014-03-12	SAN MATEO	15000
2015-04-09	SANTA CLARA	15000
2014-06-26	ALAMEDA	15000
2016-08-23	SANTA CLARA	14600
2015-07-21	CONTRA COSTA	14200
2014-02-12	SAN MATEO	14000
2014-11-07	SAN MATEO	14000
2015-04-09	SANTA CLARA	14000
2014-02-05	ALAMEDA	14000
2015-02-05	ALAMEDA	14000
2015-12-16	CONTRA COSTA	14000
2013-12-13	ALAMEDA	13000
2014-08-29	ALAMEDA	13000
2014-09-11	ALAMEDA	13000
2014-07-16	SAN MATEO	13000
2014-06-04	SAN MATEO	13000
2015-11-17	ALAMEDA	12300
2015-02-16	CONTRA COSTA	12100
2015-08-28	SAN MATEO	12000
2016-03-02	SANTA CLARA	12000
2015-07-20	CONTRA COSTA	12000
2014-03-31	ALAMEDA	12000
2014-01-09	SAN MATEO	12000
2015-12-11	ALAMEDA	11900
2015-07-20	CONTRA COSTA	11900
2015-05-13	CONTRA COSTA	11600
2014-09-15	CONTRA COSTA	11300
2016-05-25	CONTRA COSTA	11000
2015-02-11	ALAMEDA	11000
2015-04-09	SANTA CLARA	11000
2015-08-28	SAN MATEO	11000
2014-03-19	SANTA CLARA	11000
2014-06-19	ALAMEDA	11000
2015-01-28	ALAMEDA	11000
2015-10-02	ALAMEDA	11000
2016-06-24	CONTRA COSTA	11000
2014-12-30	SAN MATEO	11000
2015-08-28	SAN MATEO	11000
2014-11-07	SAN MATEO	11000
2015-07-21	CONTRA COSTA	10900
2015-08-26	CONTRA COSTA	10900
2015-07-20	CONTRA COSTA	10100
2014-11-07	SAN MATEO	10000
2016-03-09	CONTRA COSTA	10000
2014-08-29	ALAMEDA	10000
2014-02-05	ALAMEDA	10000
2014-02-05	ALAMEDA	10000
2014-03-26	SAN MATEO	10000
2013-12-06	SAN MATEO	10000
2015-04-21	SAN MATEO	10000
2015-08-05	SANTA CLARA	10000
2015-11-11	ALAMEDA	10000
2014-01-02	SAN MATEO	10000
2015-06-18	ALAMEDA	9900
2013-12-06	SAN MATEO	9800
2014-11-07	SONOMA	9800
2014-06-18	SONOMA	9700
2015-06-24	NAPA	9600
2014-01-02	SAN MATEO	9400
2015-12-16	CONTRA COSTA	9300
2013-12-30	SANTA CLARA	9300
2015-02-05	ALAMEDA	9300
2015-09-29	SANTA CLARA	9280
2016-01-14	SAN MATEO	9100
2014-06-04	SAN MATEO	9100
2015-05-20	CONTRA COSTA	9040
2014-08-29	ALAMEDA	9000
2015-02-11	ALAMEDA	8900
2014-01-02	SAN MATEO	8900
2015-08-11	ALAMEDA	8900
2015-12-16	SAN MATEO	8900
2014-07-09	SAN MATEO	8900
2013-12-26	SAN MATEO	8900
2015-05-07	SAN MATEO	8800
2014-01-30	ALAMEDA	8800
2015-12-16	CONTRA COSTA	8800
2014-11-07	SONOMA	8800
2014-02-26	SANTA CLARA	8700
2015-12-16	CONTRA COSTA	8600
2014-10-20	SAN MATEO	8500
2014-10-09	ALAMEDA	8500
2015-04-21	SAN MATEO	8400
2014-09-25	SANTA CLARA	8400
2015-07-22	CONTRA COSTA	8350
2016-05-18	SAN MATEO	8300
2015-02-16	CONTRA COSTA	8300
2015-06-18	ALAMEDA	8300
2014-01-30	ALAMEDA	8300
2015-08-05	SANTA CLARA	8300
2015-12-14	ALAMEDA	8200
2015-12-14	ALAMEDA	8100
2014-01-09	SAN MATEO	8100
2015-07-20	CONTRA COSTA	8040
2015-04-01	SAN MATEO	8000
2014-03-13	SAN MATEO	8000
2013-12-13	SONOMA	8000
2014-08-29	ALAMEDA	8000
2014-07-16	SAN MATEO	7900
2014-01-10	SAN MATEO	7800
2015-09-16	SAN MATEO	7790
2014-10-03	ALAMEDA	7700
2014-04-16	SAN MATEO	7700
2015-07-20	CONTRA COSTA	7680
2015-06-22	CONTRA COSTA	7580
2015-08-03	SANTA CLARA	7460
2015-04-21	SAN MATEO	7400
2014-04-29	SAN MATEO	7400
2014-10-03	ALAMEDA	7400
2014-03-31	CONTRA COSTA	7360
2016-08-23	SANTA CLARA	7340
2015-01-27	ALAMEDA	7300
2014-03-31	ALAMEDA	7300
2015-07-22	CONTRA COSTA	7270
2014-10-09	ALAMEDA	7200
2015-06-04	MARIN	7200
2015-06-11	SANTA CLARA	7200
2014-04-16	SAN MATEO	7100
2015-08-05	SANTA CLARA	7000
2016-07-18	MARIN	7000
2014-06-18	SONOMA	7000
2014-04-03	SAN MATEO	7000
2015-11-11	ALAMEDA	7000
2014-01-09	SAN MATEO	7000
2015-07-20	CONTRA COSTA	6940
2013-12-13	ALAMEDA	6900
2015-01-27	ALAMEDA	6900
2014-01-31	SANTA CLARA	6820
2015-07-20	CONTRA COSTA	6820
2016-04-14	SAN MATEO	6800
2014-09-11	ALAMEDA	6800
2016-04-14	SAN MATEO	6700
2015-02-05	ALAMEDA	6700
2014-03-31	ALAMEDA	6700
2015-07-15	MARIN	6700
2014-02-12	SAN MATEO	6600
2014-07-16	SAN MATEO	6600
2014-08-14	ALAMEDA	6600
2015-12-16	CONTRA COSTA	6600
2015-08-26	SANTA CLARA	6520
2015-12-15	ALAMEDA	6500
2014-08-29	ALAMEDA	6500
2016-06-07	MARIN	6500
2014-01-31	SANTA CLARA	6470
2014-02-12	SAN MATEO	6400
2014-10-09	ALAMEDA	6400
2015-04-21	SAN MATEO	6400
2016-01-06	ALAMEDA	6300
2014-03-26	SAN MATEO	6300
2015-07-22	SAN MATEO	6300
2014-12-30	SAN MATEO	6300
2015-07-22	CONTRA COSTA	6280
2016-01-14	ALAMEDA	6230
2016-05-09	ALAMEDA	6200
2016-05-25	CONTRA COSTA	6200
2014-09-19	SAN MATEO	6200
2014-10-10	ALAMEDA	6200
2015-10-02	ALAMEDA	6200
2014-06-25	ALAMEDA	6200
2013-12-19	SANTA CLARA	6200
2014-06-18	SONOMA	6200
2014-05-22	SANTA CLARA	6200
2015-05-13	CONTRA COSTA	6160
2015-06-22	CONTRA COSTA	6160
2014-03-26	CONTRA COSTA	6120
2015-12-10	MARIN	6100
2015-04-30	NAPA	6100
2015-01-13	SAN MATEO	6100
2014-06-25	ALAMEDA	6100
2015-01-05	CONTRA COSTA	6070
2015-05-20	CONTRA COSTA	6040
2015-02-16	CONTRA COSTA	6030
2015-08-28	SAN MATEO	6000
2014-02-12	SAN MATEO	5900
2015-01-28	ALAMEDA	5900
2014-03-31	ALAMEDA	5900
2014-03-21	SONOMA	5900
2015-01-13	SAN MATEO	5900
2015-02-05	ALAMEDA	5900
2014-10-10	ALAMEDA	5800
2015-01-28	ALAMEDA	5700
2014-09-11	ALAMEDA	5700
2015-07-20	CONTRA COSTA	5650
2015-02-11	CONTRA COSTA	5620
2015-02-05	ALAMEDA	5600
2015-06-18	ALAMEDA	5600
2014-08-29	ALAMEDA	5600
2013-12-13	SONOMA	5600
2016-02-25	SANTA CLARA	5530
2016-01-14	SAN MATEO	5500
2015-08-05	SANTA CLARA	5500
2014-08-20	SANTA CLARA	5500
2015-06-22	CONTRA COSTA	5500
2014-04-17	SAN MATEO	5500
2015-02-11	CONTRA COSTA	5410
2015-04-09	SANTA CLARA	5400
2013-12-27	SAN MATEO	5400
2014-07-16	SAN MATEO	5400
2015-07-22	SAN MATEO	5400
2015-07-20	CONTRA COSTA	5350
2014-10-14	ALAMEDA	5300
2014-03-13	SAN MATEO	5300
2014-09-25	SANTA CLARA	5300
2014-09-11	ALAMEDA	5300
2014-02-19	CONTRA COSTA	5270
2014-02-05	ALAMEDA	5200
2014-01-20	SAN MATEO	5100
2015-01-21	ALAMEDA	5100
2015-12-21	CONTRA COSTA	5100
2013-12-23	SANTA CLARA	5100
2014-03-12	SAN MATEO	5000
2016-07-18	NO COUNTY FOUND	5000
2014-02-19	CONTRA COSTA	4970
2014-08-29	ALAMEDA	4900
2014-07-16	SAN MATEO	4900
2014-06-25	ALAMEDA	4900
2014-03-31	ALAMEDA	4900
2014-10-09	ALAMEDA	4900
2015-02-05	ALAMEDA	4900
2015-02-05	ALAMEDA	4900
2015-04-09	CONTRA COSTA	4880
2015-04-09	SAN MATEO	4880
2015-09-16	SAN MATEO	4820
2015-08-03	SANTA CLARA	4800
2014-09-11	ALAMEDA	4800
2014-03-12	SAN MATEO	4800
2014-01-02	SAN MATEO	4800
2016-07-18	MARIN	4800
2016-08-17	SAN MATEO	4800
2013-12-13	ALAMEDA	4800
2015-03-11	SAN MATEO	4800
2014-03-13	SAN MATEO	4800
2014-07-16	SAN MATEO	4800
2014-11-13	ALAMEDA	4700
2015-10-02	ALAMEDA	4700
2016-01-18	SAN MATEO	4700
2014-06-04	SAN MATEO	4700
2015-04-21	SAN MATEO	4700
2015-06-18	ALAMEDA	4700
2015-12-16	CONTRA COSTA	4700
2015-07-20	CONTRA COSTA	4690
2015-07-20	SAN MATEO	4600
2016-03-02	SANTA CLARA	4600
2015-01-28	ALAMEDA	4600
2015-02-05	ALAMEDA	4600
2016-02-25	SANTA CLARA	4550
2015-06-22	CONTRA COSTA	4530
2015-07-20	CONTRA COSTA	4520
2014-01-20	SAN MATEO	4500
2014-10-16	SONOMA	4500
2016-02-12	SAN MATEO	4500
2016-07-18	NO COUNTY FOUND	4500
2015-05-07	SAN MATEO	4500
2015-01-19	SAN MATEO	4500
2015-11-17	ALAMEDA	4450
2015-02-05	ALAMEDA	4400
2015-04-20	SAN MATEO	4400
2015-11-05	SANTA CLARA	4400
2015-12-14	ALAMEDA	4400
2014-10-14	ALAMEDA	4300
2014-05-16	MARIN	4300
2016-05-25	CONTRA COSTA	4300
2015-04-21	SAN MATEO	4300
2014-11-13	ALAMEDA	4300
2015-02-11	CONTRA COSTA	4250
2015-07-22	SAN MATEO	4200
2016-04-20	SANTA CLARA	4200
2016-07-18	NO COUNTY FOUND	4200
2014-01-09	SAN MATEO	4200
2015-06-18	ALAMEDA	4200
2014-10-20	SAN MATEO	4200
2014-08-27	CONTRA COSTA	4170
2014-02-12	SAN MATEO	4100
2014-11-07	SAN MATEO	4100
2013-12-06	SAN MATEO	4100
2015-08-20	SAN MATEO	4100
2015-01-19	SAN MATEO	4000
2015-10-19	SAN MATEO	4000
2015-10-19	SAN MATEO	4000
2014-06-04	SAN MATEO	4000
2014-03-12	SAN MATEO	4000
2016-05-18	SAN MATEO	4000
2015-07-20	SAN MATEO	4000
2015-07-22	CONTRA COSTA	3980
2015-04-17	CONTRA COSTA	3920
2014-07-18	SANTA CLARA	3900
2014-08-29	ALAMEDA	3800
2015-06-04	MARIN	3800
2015-03-20	CONTRA COSTA	3800
2014-04-29	SAN MATEO	3800
2015-12-16	CONTRA COSTA	3800
2014-04-21	SAN MATEO	3800
2014-08-14	ALAMEDA	3800
2015-08-11	ALAMEDA	3800
2014-06-26	ALAMEDA	3800
2014-01-10	SAN MATEO	3800
2015-06-22	CONTRA COSTA	3730
2014-10-14	ALAMEDA	3700
2014-10-10	ALAMEDA	3700
2015-01-28	ALAMEDA	3700
2015-08-25	CONTRA COSTA	3700
2015-01-20	ALAMEDA	3700
2015-12-15	ALAMEDA	3700
2014-11-14	MARIN	3700
2014-02-05	ALAMEDA	3700
2015-07-28	SANTA CLARA	3700
2016-05-09	ALAMEDA	3700
2014-11-14	MARIN	3700
2014-09-11	ALAMEDA	3700
2015-10-02	ALAMEDA	3700
2014-07-09	SAN MATEO	3700
2015-11-24	NO COUNTY FOUND	3700
2014-04-29	SAN MATEO	3700
2016-01-18	SAN MATEO	3700
2014-09-15	CONTRA COSTA	3680
2014-09-25	SANTA CLARA	3600
2014-10-16	SAN MATEO	3600
2015-03-09	SANTA CLARA	3600
2014-05-28	CONTRA COSTA	3510
2014-02-05	ALAMEDA	3500
2016-04-27	SANTA CLARA	3500
2014-06-25	ALAMEDA	3500
2016-01-21	NO COUNTY FOUND	3500
2014-09-24	SANTA CLARA	3500
2015-02-11	CONTRA COSTA	3410
2014-06-04	SAN MATEO	3400
2015-11-10	ALAMEDA	3400
2014-10-10	ALAMEDA	3400
2015-05-18	SAN MATEO	3400
2013-12-19	SANTA CLARA	3400
2014-01-20	SAN MATEO	3400
2015-06-22	CONTRA COSTA	3330
2014-05-28	CONTRA COSTA	3320
2014-09-17	SANTA CLARA	3300
2016-07-06	MARIN	3300
2014-10-14	ALAMEDA	3300
2015-01-28	ALAMEDA	3300
2014-03-13	SAN MATEO	3300
2014-07-15	SANTA CLARA	3300
2016-04-21	ALAMEDA	3240
2014-08-27	CONTRA COSTA	3210
2014-08-27	CONTRA COSTA	3200
2014-02-19	SANTA CLARA	3200
2014-03-31	ALAMEDA	3200
2015-05-13	SANTA CLARA	3200
2016-04-22	SAN MATEO	3200
2015-12-15	ALAMEDA	3200
2014-02-05	ALAMEDA	3200
2015-01-28	ALAMEDA	3200
2016-05-25	CONTRA COSTA	3100
2015-01-28	ALAMEDA	3100
2015-09-10	CONTRA COSTA	3060
2016-03-17	ALAMEDA	3060
2015-05-20	CONTRA COSTA	3000
2013-12-13	ALAMEDA	3000
2014-04-21	SAN MATEO	3000
2016-07-18	ALAMEDA	3000
2015-01-21	ALAMEDA	3000
2014-07-16	SAN MATEO	3000
2015-04-21	SONOMA	3000
2014-03-31	ALAMEDA	3000
2016-08-29	CONTRA COSTA	3000
2014-01-31	SANTA CLARA	2960
2015-05-20	CONTRA COSTA	2920
2015-04-01	SAN MATEO	2900
2014-01-02	SAN MATEO	2900
2016-01-18	SANTA CLARA	2900
2014-02-26	SANTA CLARA	2900
2014-07-10	SAN MATEO	2900
2014-06-25	ALAMEDA	2900
2015-06-04	SANTA CLARA	2880
2016-02-18	ALAMEDA	2880
2014-04-24	CONTRA COSTA	2880
2016-08-23	SANTA CLARA	2870
2014-05-29	CONTRA COSTA	2850
2014-03-04	ALAMEDA	2840
2013-12-13	ALAMEDA	2800
2015-01-14	SAN MATEO	2800
2015-12-15	ALAMEDA	2800
2016-05-09	ALAMEDA	2800
2014-11-13	ALAMEDA	2800
2014-03-12	SAN MATEO	2800
2015-06-18	SAN MATEO	2800
2014-03-19	SAN MATEO	2800
2015-12-14	ALAMEDA	2800
2014-04-15	MARIN	2800
2015-08-12	SAN MATEO	2800
2014-08-29	ALAMEDA	2800
2014-06-11	ALAMEDA	2800
2014-06-19	ALAMEDA	2800
2014-10-20	SAN MATEO	2800
2015-07-21	CONTRA COSTA	2750
2014-03-04	ALAMEDA	2710
2014-07-16	SAN MATEO	2700
2013-12-18	SANTA CLARA	2700
2013-12-18	NAPA	2700
2015-07-20	SAN MATEO	2700
2016-01-18	SAN MATEO	2700
2015-11-11	ALAMEDA	2700
2016-05-18	SAN MATEO	2700
2015-01-28	ALAMEDA	2700
2015-04-21	SAN MATEO	2700
2014-10-15	SAN MATEO	2700
2014-07-31	NAPA	2700
2014-12-18	SANTA CLARA	2700
2015-07-20	CONTRA COSTA	2620
2015-04-20	SAN MATEO	2600
2014-04-25	NAPA	2600
2014-02-06	ALAMEDA	2600
2014-04-29	SAN MATEO	2600
2016-03-10	SANTA CLARA	2600
2014-06-10	ALAMEDA	2600
2015-06-18	ALAMEDA	2600
2015-01-19	SAN MATEO	2600
2014-07-16	SAN MATEO	2600
2015-04-21	SAN MATEO	2600
2014-06-11	ALAMEDA	2600
2015-06-04	MARIN	2600
2014-09-10	SANTA CLARA	2600
2015-08-20	SAN MATEO	2600
2013-12-18	SANTA CLARA	2600
2015-10-19	SAN MATEO	2600
2014-03-04	ALAMEDA	2530
2015-01-26	CONTRA COSTA	2510
2016-07-13	NAPA	2500
2015-12-15	ALAMEDA	2500
2014-03-21	SONOMA	2500
2015-11-03	CONTRA COSTA	2500
2014-02-05	ALAMEDA	2500
2016-01-06	ALAMEDA	2500
2015-08-17	SAN MATEO	2500
2015-08-10	ALAMEDA	2500
2015-06-18	ALAMEDA	2500
2014-02-19	CONTRA COSTA	2480
2015-05-07	CONTRA COSTA	2440
2016-08-23	SANTA CLARA	2410
2015-09-23	CONTRA COSTA	2400
2015-10-02	ALAMEDA	2400
2016-05-25	CONTRA COSTA	2400
2016-08-29	CONTRA COSTA	2400
2015-05-06	SAN MATEO	2400
2015-12-15	ALAMEDA	2400
2015-12-02	CONTRA COSTA	2370
2016-08-23	SANTA CLARA	2320
2014-10-09	ALAMEDA	2300
2014-10-24	SONOMA	2300
2016-08-23	SANTA CLARA	2300
2014-11-07	SAN MATEO	2300
2014-04-29	SAN MATEO	2300
2015-08-28	SAN MATEO	2300
2015-05-06	SAN MATEO	2300
2015-03-25	SAN MATEO	2270
2015-06-04	SANTA CLARA	2220
2016-03-17	ALAMEDA	2210
2014-01-02	SAN MATEO	2200
2014-03-21	SONOMA	2200
2014-10-07	CONTRA COSTA	2200
2014-02-19	CONTRA COSTA	2140
2015-10-20	CONTRA COSTA	2110
2014-01-30	ALAMEDA	2100
2013-12-18	NAPA	2100
2015-09-09	SANTA CLARA	2100
2015-06-18	ALAMEDA	2100
2016-03-09	CONTRA COSTA	2100
2015-07-21	SAN MATEO	2100
2015-10-02	ALAMEDA	2100
2015-06-18	ALAMEDA	2100
2014-06-24	CONTRA COSTA	2090
2015-01-05	CONTRA COSTA	2050
2014-12-19	SANTA CLARA	2000
2013-12-18	SANTA CLARA	2000
2015-04-01	SAN MATEO	2000
2013-12-12	ALAMEDA	2000
2014-03-04	ALAMEDA	2000
2016-08-29	CONTRA COSTA	2000
2014-11-25	SANTA CLARA	2000
2014-06-20	ALAMEDA	2000
2014-11-13	CONTRA COSTA	1990
2016-02-18	ALAMEDA	1980
2014-10-22	CONTRA COSTA	1940
2014-09-18	CONTRA COSTA	1920
2015-10-20	CONTRA COSTA	1910
2013-12-30	SANTA CLARA	1900
2014-06-04	SAN MATEO	1900
2014-07-15	MARIN	1900
2016-08-29	CONTRA COSTA	1900
2015-12-15	ALAMEDA	1900
2014-04-23	MARIN	1900
2013-12-11	CONTRA COSTA	1900
2015-12-16	CONTRA COSTA	1900
2015-05-07	SAN MATEO	1900
2015-03-19	NAPA	1900
2014-10-16	SONOMA	1900
2014-03-04	ALAMEDA	1900
2016-03-17	ALAMEDA	1890
2016-02-18	ALAMEDA	1890
2015-09-16	SAN MATEO	1870
2014-07-22	CONTRA COSTA	1860
2015-01-22	CONTRA COSTA	1860
2015-09-16	CONTRA COSTA	1860
2015-10-06	ALAMEDA	1850
2015-01-05	CONTRA COSTA	1830
2015-07-15	CONTRA COSTA	1820
2015-04-09	SAN MATEO	1810
2015-09-29	SANTA CLARA	1810
2015-04-09	CONTRA COSTA	1810
2014-01-22	ALAMEDA	1800
2016-03-09	CONTRA COSTA	1800
2014-01-22	ALAMEDA	1800
2014-01-02	SAN MATEO	1800
2015-01-20	ALAMEDA	1800
2014-03-19	NAPA	1800
2015-04-21	SAN MATEO	1800
2014-11-07	SAN MATEO	1800
2014-07-16	SAN MATEO	1800
2015-07-14	SAN MATEO	1800
2014-03-12	SAN MATEO	1800
2015-06-03	SAN MATEO	1800
2014-07-22	CONTRA COSTA	1800
2014-03-31	CONTRA COSTA	1770
2015-05-07	CONTRA COSTA	1760
2015-03-20	CONTRA COSTA	1750
2016-08-05	ALAMEDA	1740
2014-03-04	ALAMEDA	1740
2014-04-30	CONTRA COSTA	1740
2016-02-22	SANTA CLARA	1700
2014-12-10	CONTRA COSTA	1700
2016-03-09	CONTRA COSTA	1700
2014-03-12	SAN MATEO	1700
2016-08-29	CONTRA COSTA	1700
2014-10-06	SANTA CLARA	1700
2014-10-16	SONOMA	1700
2014-07-14	SANTA CLARA	1700
2014-10-10	ALAMEDA	1700
2014-06-10	ALAMEDA	1700
2015-07-14	CONTRA COSTA	1680
2014-11-13	CONTRA COSTA	1670
2014-11-13	CONTRA COSTA	1660
2015-07-14	CONTRA COSTA	1660
2015-01-22	CONTRA COSTA	1640
2014-09-08	SANTA CLARA	1620
2015-08-23	SANTA CLARA	1600
2014-06-26	ALAMEDA	1600
2014-10-10	ALAMEDA	1600
2015-09-23	CONTRA COSTA	1600
2016-01-14	ALAMEDA	1600
2014-11-12	ALAMEDA	1600
2015-09-23	CONTRA COSTA	1600
2015-04-27	ALAMEDA	1600
2014-06-19	ALAMEDA	1600
2015-11-05	CONTRA COSTA	1530
2015-12-02	CONTRA COSTA	1530
2015-01-28	CONTRA COSTA	1510
2015-06-18	SAN MATEO	1500
2014-03-12	SAN MATEO	1500
2014-06-09	MARIN	1500
2016-02-01	NAPA	1500
2015-12-16	CONTRA COSTA	1500
2014-06-20	ALAMEDA	1500
2015-04-09	SANTA CLARA	1500
2014-02-25	CONTRA COSTA	1500
2015-08-03	NAPA	1500
2016-05-10	NAPA	1500
2015-01-28	ALAMEDA	1500
2014-02-05	NAPA	1500
2014-03-03	SANTA CLARA	1450
2015-11-05	CONTRA COSTA	1440
2016-02-26	NAPA	1400
2014-09-11	ALAMEDA	1400
2014-01-30	ALAMEDA	1400
2014-11-12	MARIN	1400
2015-12-16	CONTRA COSTA	1400
2016-05-23	NAPA	1400
2015-12-02	SONOMA	1400
2014-11-12	MARIN	1400
2016-03-09	CONTRA COSTA	1400
2014-09-11	ALAMEDA	1400
2014-03-03	SANTA CLARA	1400
2014-11-25	SAN MATEO	1400
2014-12-04	SAN MATEO	1400
2014-06-10	ALAMEDA	1400
2016-08-25	SANTA CLARA	1400
2016-03-09	CONTRA COSTA	1400
2014-07-23	CONTRA COSTA	1380
2015-12-02	CONTRA COSTA	1360
2015-08-26	SANTA CLARA	1350
2014-06-11	ALAMEDA	1300
2014-11-13	MARIN	1300
2014-08-13	ALAMEDA	1300
2014-08-14	ALAMEDA	1300
2014-06-04	SAN MATEO	1300
2015-10-20	SOLANO	1300
2013-12-12	ALAMEDA	1300
2014-12-17	SANTA CLARA	1300
2015-03-05	SANTA CLARA	1300
2014-08-13	ALAMEDA	1300
2014-11-13	MARIN	1300
2015-06-18	ALAMEDA	1300
2016-08-25	SANTA CLARA	1300
2014-01-23	SANTA CLARA	1300
2015-10-20	SOLANO	1300
2014-10-21	SANTA CLARA	1300
2014-06-09	CONTRA COSTA	1300
2014-08-14	ALAMEDA	1300
2014-09-19	SAN MATEO	1300
2016-01-18	SONOMA	1300
2016-08-29	CONTRA COSTA	1300
2014-04-21	SAN MATEO	1300
2014-08-13	SANTA CLARA	1200
2016-03-09	CONTRA COSTA	1200
2014-11-13	CONTRA COSTA	1200
2015-08-11	ALAMEDA	1200
2016-01-13	SAN MATEO	1200
2016-05-25	CONTRA COSTA	1200
2015-12-15	ALAMEDA	1200
2015-12-16	CONTRA COSTA	1200
2014-01-20	NAPA	1200
2015-12-16	CONTRA COSTA	1200
2016-01-19	SAN MATEO	1200
2014-09-19	SAN MATEO	1200
2016-07-26	SANTA CLARA	1200
2016-05-25	CONTRA COSTA	1200
2014-01-22	ALAMEDA	1200
2013-12-26	SAN MATEO	1200
2014-01-22	ALAMEDA	1200
2014-05-01	CONTRA COSTA	1190
2015-03-10	MARIN	1100
2015-05-06	NAPA	1100
2014-02-05	NAPA	1100
2015-03-03	SANTA CLARA	1100
2014-01-22	ALAMEDA	1100
2014-06-16	SANTA CLARA	1100
2014-03-12	SAN MATEO	1100
2015-12-02	SAN MATEO	1100
2015-01-20	ALAMEDA	1100
2014-12-17	SANTA CLARA	1100
2015-09-23	CONTRA COSTA	1100
2014-01-14	MARIN	1100
2015-10-02	ALAMEDA	1100
2015-03-20	CONTRA COSTA	1080
2015-05-05	CONTRA COSTA	1080
2015-12-02	CONTRA COSTA	1080
2015-01-05	CONTRA COSTA	1070
2015-06-22	CONTRA COSTA	1060
2014-03-05	SANTA CLARA	1039
2015-07-15	CONTRA COSTA	1030
2016-03-15	MARIN	1000
2014-12-30	SAN MATEO	1000
2016-04-05	MARIN	1000
2014-06-11	ALAMEDA	1000
2016-06-06	SONOMA	1000
2015-04-09	SANTA CLARA	1000
2014-02-18	SANTA CLARA	1000
2015-12-16	CONTRA COSTA	1000
2016-05-25	CONTRA COSTA	1000
2016-05-25	CONTRA COSTA	1000
2014-06-19	ALAMEDA	1000
2013-12-19	SANTA CLARA	1000
2016-03-09	CONTRA COSTA	1000
2015-12-14	ALAMEDA	1000
2015-11-11	ALAMEDA	1000
2014-06-11	ALAMEDA	1000
2014-08-14	ALAMEDA	1000
2015-08-28	SAN MATEO	990
2014-01-22	ALAMEDA	990
2014-12-17	SANTA CLARA	990
2015-08-12	SAN MATEO	990
2016-04-05	MARIN	970
2015-11-16	NAPA	970
2014-08-14	SANTA CLARA	960
2014-07-10	SAN MATEO	960
2014-09-08	SAN MATEO	960
2016-03-09	SAN MATEO	960
2015-10-06	ALAMEDA	950
2014-10-01	CONTRA COSTA	948
2015-04-01	SAN MATEO	940
2015-01-28	ALAMEDA	940
2014-10-15	NAPA	940
2014-11-12	MARIN	930
2014-11-12	MARIN	930
2013-12-30	SANTA CLARA	925
2015-01-21	ALAMEDA	920
2013-12-05	SAN MATEO	920
2015-08-11	ALAMEDA	910
2014-01-22	ALAMEDA	910
2015-01-21	ALAMEDA	900
2015-03-11	SAN MATEO	900
2014-04-10	SANTA CLARA	900
2014-12-04	SAN MATEO	890
2014-05-01	CONTRA COSTA	883
2015-04-29	CONTRA COSTA	881
2014-10-14	ALAMEDA	880
2014-01-13	SANTA CLARA	870
2016-04-14	ALAMEDA	870
2015-03-20	CONTRA COSTA	868
2014-06-10	ALAMEDA	860
2014-03-03	SANTA CLARA	860
2014-09-19	SAN MATEO	860
2015-10-20	SAN MATEO	860
2015-09-29	SANTA CLARA	857
2015-09-23	SONOMA	850
2015-08-10	ALAMEDA	850
2014-06-19	ALAMEDA	840
2014-01-22	ALAMEDA	840
2013-12-18	SANTA CLARA	840
2015-12-16	CONTRA COSTA	840
2014-08-27	SAN MATEO	830
2015-06-03	SAN MATEO	830
2016-08-29	CONTRA COSTA	820
2015-04-23	CONTRA COSTA	810
2014-06-02	SAN MATEO	810
2015-12-15	ALAMEDA	810
2014-08-14	ALAMEDA	810
2014-10-14	ALAMEDA	800
2014-04-17	NAPA	800
2014-03-12	SAN MATEO	800
2014-05-23	SANTA CLARA	800
2014-05-20	SANTA CLARA	800
2015-10-06	ALAMEDA	799
2015-12-11	ALAMEDA	787
2014-04-29	SAN MATEO	780
2015-06-23	SANTA CLARA	780
2016-08-03	MARIN	780
2014-09-23	SANTA CLARA	770
2015-08-13	SANTA CLARA	770
2014-06-09	MARIN	770
2014-12-22	SANTA CLARA	760
2015-10-02	ALAMEDA	760
2015-01-21	ALAMEDA	760
2014-08-20	SAN MATEO	760
2015-09-24	CONTRA COSTA	753
2014-06-10	ALAMEDA	750
2016-04-14	ALAMEDA	750
2016-03-09	SAN MATEO	750
2015-12-16	CONTRA COSTA	740
2015-11-11	ALAMEDA	740
2015-07-13	CONTRA COSTA	739
2015-04-17	CONTRA COSTA	731
2014-03-12	SANTA CLARA	730
2014-09-04	SANTA CLARA	730
2015-07-22	SAN MATEO	730
2014-02-05	NAPA	730
2016-06-21	SAN MATEO	720
2014-09-04	CONTRA COSTA	720
2014-10-30	CONTRA COSTA	717
2014-03-12	SAN MATEO	710
2014-10-23	SANTA CLARA	710
2016-02-04	SANTA CLARA	710
2015-01-27	ALAMEDA	710
2016-03-03	SANTA CLARA	700
2014-01-22	ALAMEDA	690
2015-03-16	MARIN	690
2015-01-27	ALAMEDA	690
2014-11-13	ALAMEDA	690
2015-03-11	SAN MATEO	690
2014-07-09	SAN MATEO	690
2014-08-13	ALAMEDA	680
2015-05-12	SANTA CLARA	680
2016-05-25	CONTRA COSTA	680
2014-12-30	SAN MATEO	680
2014-09-29	CONTRA COSTA	680
2014-03-04	ALAMEDA	680
2014-06-24	CONTRA COSTA	671
2014-01-30	ALAMEDA	670
2015-01-21	ALAMEDA	660
2015-03-20	CONTRA COSTA	659
2014-06-18	SONOMA	650
2015-03-12	CONTRA COSTA	650
2014-02-12	SAN MATEO	640
2015-04-09	SAN MATEO	640
2016-08-25	SANTA CLARA	640
2014-06-24	CONTRA COSTA	631
2015-10-02	ALAMEDA	630
2014-06-11	ALAMEDA	630
2014-01-30	ALAMEDA	630
2015-12-16	CONTRA COSTA	630
2016-07-19	SANTA CLARA	620
2016-01-07	ALAMEDA	620
2014-12-18	SANTA CLARA	620
2014-10-29	CONTRA COSTA	620
2015-06-09	NAPA	610
2014-03-20	SANTA CLARA	610
2014-01-22	ALAMEDA	610
2015-06-18	SAN MATEO	600
2014-09-19	SAN MATEO	600
2014-06-10	ALAMEDA	600
2016-05-25	CONTRA COSTA	600
2014-11-12	ALAMEDA	600
2014-02-26	SANTA CLARA	600
2015-08-04	SAN MATEO	580
2014-10-03	ALAMEDA	580
2014-02-12	SONOMA	580
2014-06-16	SONOMA	580
2014-12-30	NAPA	580
2013-12-18	SANTA CLARA	570
2015-04-09	SANTA CLARA	570
2014-05-28	SANTA CLARA	566
2015-06-22	CONTRA COSTA	565
2014-08-13	ALAMEDA	560
2013-12-05	SAN MATEO	550
2015-12-14	ALAMEDA	550
2014-05-19	SONOMA	550
2014-11-13	SANTA CLARA	540
2016-03-04	SANTA CLARA	540
2015-05-12	SOLANO	540
2013-12-18	SANTA CLARA	530
2014-11-25	SANTA CLARA	526
2015-08-26	SANTA CLARA	525
2016-02-09	SANTA CLARA	520
2014-04-24	CONTRA COSTA	520
2015-08-28	SAN MATEO	520
2014-07-16	SAN MATEO	520
2014-05-05	CONTRA COSTA	516
2016-08-23	SANTA CLARA	515
2014-10-23	CONTRA COSTA	514
2015-12-15	ALAMEDA	510
2016-03-10	CONTRA COSTA	510
2015-12-15	ALAMEDA	510
2014-09-08	SAN MATEO	510
2015-07-16	CONTRA COSTA	508
2014-09-09	NAPA	500
2014-12-18	SANTA CLARA	500
2013-12-16	ALAMEDA	500
2014-10-28	CONTRA COSTA	493
2015-10-22	CONTRA COSTA	491
2014-08-14	ALAMEDA	490
2015-12-16	CONTRA COSTA	490
2014-06-09	MARIN	490
2015-07-09	CONTRA COSTA	489
2014-02-06	ALAMEDA	480
2014-02-06	ALAMEDA	480
2014-06-24	NAPA	480
2016-06-22	SONOMA	480
2015-01-21	ALAMEDA	480
2015-07-09	CONTRA COSTA	477
2013-12-26	SAN MATEO	470
2015-09-23	CONTRA COSTA	470
2015-03-16	SONOMA	470
2016-01-07	ALAMEDA	470
2014-07-24	CONTRA COSTA	465
2014-10-23	CONTRA COSTA	462
2014-01-28	CONTRA COSTA	460
2016-08-29	CONTRA COSTA	460
2015-12-03	SANTA CLARA	460
2014-12-19	SANTA CLARA	460
2014-11-13	ALAMEDA	460
2015-06-22	CONTRA COSTA	459
2015-02-24	SANTA CLARA	452
2015-10-01	CONTRA COSTA	451
2014-01-08	SANTA CLARA	450
2015-05-07	CONTRA COSTA	450
2014-10-07	CONTRA COSTA	448
2015-04-14	MARIN	440
2013-12-05	SAN MATEO	440
2016-03-29	SONOMA	440
2016-04-27	SANTA CLARA	440
2014-10-07	CONTRA COSTA	439
2015-10-29	CONTRA COSTA	431
2016-07-19	SANTA CLARA	430
2013-12-26	SAN MATEO	430
2016-08-29	CONTRA COSTA	430
2015-05-19	SANTA CLARA	420
2014-01-22	ALAMEDA	420
2013-12-18	SANTA CLARA	420
2014-02-06	CONTRA COSTA	416
2014-12-19	SANTA CLARA	410
2014-02-06	ALAMEDA	410
2014-05-28	SANTA CLARA	409
2014-07-24	CONTRA COSTA	409
2015-01-22	CONTRA COSTA	404
2015-10-06	ALAMEDA	401
2014-09-25	SANTA CLARA	400
2015-02-24	SANTA CLARA	393
2015-06-08	SONOMA	390
2016-08-29	CONTRA COSTA	390
2016-03-14	SONOMA	390
2014-09-16	SANTA CLARA	390
2016-08-29	CONTRA COSTA	390
2016-03-09	SONOMA	390
2015-01-05	CONTRA COSTA	384
2013-12-27	SAN MATEO	380
2014-06-02	SAN MATEO	380
2014-11-14	MARIN	370
2015-09-24	SANTA CLARA	370
2014-11-14	MARIN	370
2016-07-19	SAN MATEO	360
2014-12-18	SANTA CLARA	360
2014-03-03	SANTA CLARA	360
2015-05-07	CONTRA COSTA	356
2014-05-08	CONTRA COSTA	351
2014-10-24	SONOMA	350
2014-03-13	SAN MATEO	350
2016-06-20	SONOMA	350
2014-07-16	SANTA CLARA	350
2015-12-03	SANTA CLARA	350
2015-03-05	SANTA CLARA	350
2014-09-03	SAN MATEO	340
2014-08-14	ALAMEDA	340
2014-04-30	SONOMA	340
2014-07-15	SAN MATEO	340
2015-06-22	NAPA	340
2015-11-02	CONTRA COSTA	339
2015-08-13	SANTA CLARA	330
2016-07-18	MARIN	330
2014-09-17	SOLANO	330
2015-03-25	SAN MATEO	330
2015-05-04	CONTRA COSTA	329
2015-06-18	SONOMA	320
2014-05-19	SONOMA	320
2016-06-16	NAPA	320
2014-06-17	SANTA CLARA	320
2014-12-04	SANTA CLARA	320
2015-01-28	ALAMEDA	320
2015-01-27	SANTA CLARA	320
2014-02-05	NAPA	320
2016-08-29	CONTRA COSTA	320
2014-01-23	SANTA CLARA	320
2015-01-22	CONTRA COSTA	312
2015-01-21	ALAMEDA	310
2016-08-29	CONTRA COSTA	310
2016-08-29	CONTRA COSTA	310
2015-08-27	SANTA CLARA	310
2015-01-21	ALAMEDA	310
2015-06-16	SANTA CLARA	310
2014-12-18	SANTA CLARA	310
2015-07-23	CONTRA COSTA	302
2015-09-09	CONTRA COSTA	301
2015-12-16	SONOMA	300
2016-05-03	MARIN	300
2015-03-18	SANTA CLARA	300
2016-03-15	SAN MATEO	300
2016-03-04	SANTA CLARA	300
2014-01-09	SANTA CLARA	300
2014-08-13	SANTA CLARA	300
2016-02-11	SANTA CLARA	300
2015-10-01	CONTRA COSTA	292
2015-10-01	CONTRA COSTA	291
2015-07-27	MARIN	290
2016-01-28	SAN MATEO	290
2014-04-03	SAN MATEO	290
2016-02-25	SANTA CLARA	288
2014-09-29	CONTRA COSTA	287
2015-01-28	ALAMEDA	280
2014-06-16	SONOMA	280
2014-01-14	SANTA CLARA	280
2016-03-09	SONOMA	280
2016-07-21	CONTRA COSTA	280
2013-12-17	ALAMEDA	280
2014-09-05	SANTA CLARA	280
2015-12-08	SANTA CLARA	270
2014-09-29	CONTRA COSTA	270
2014-01-22	ALAMEDA	270
2014-03-27	SANTA CLARA	270
2015-01-29	SONOMA	270
2015-06-24	SANTA CLARA	270
2015-12-02	SAN MATEO	270
2014-10-09	ALAMEDA	270
2014-03-26	SAN MATEO	270
2014-02-13	CONTRA COSTA	269
2014-02-13	CONTRA COSTA	264
2014-05-14	CONTRA COSTA	262
2014-11-07	SONOMA	260
2014-04-30	SANTA CLARA	260
2015-03-20	SANTA CLARA	260
2014-05-20	SANTA CLARA	260
2014-11-13	ALAMEDA	260
2014-11-12	ALAMEDA	260
2016-05-25	CONTRA COSTA	260
2015-02-24	SANTA CLARA	257
2014-05-14	CONTRA COSTA	253
2014-12-17	SANTA CLARA	250
2014-04-30	SANTA CLARA	250
2016-03-09	CONTRA COSTA	250
2015-02-03	MARIN	250
2014-07-24	SANTA CLARA	250
2015-10-05	CONTRA COSTA	248
2015-12-14	SANTA CLARA	242
2014-09-16	SONOMA	240
2015-12-03	SANTA CLARA	240
2014-09-08	SANTA CLARA	240
2014-05-27	SANTA CLARA	240
2014-01-23	SANTA CLARA	240
2016-08-29	CONTRA COSTA	240
2014-10-28	NAPA	240
2014-03-13	SONOMA	240
2014-07-24	CONTRA COSTA	239
2014-05-20	SANTA CLARA	230
2015-11-17	SAN MATEO	230
2015-06-23	SANTA CLARA	230
2014-12-17	SONOMA	230
2016-04-19	SAN MATEO	230
2014-04-22	SONOMA	230
2014-02-10	SANTA CLARA	230
2014-12-18	SANTA CLARA	230
2014-03-04	SANTA CLARA	230
2015-08-11	SANTA CLARA	230
2015-02-03	SAN MATEO	227
2015-01-05	CONTRA COSTA	222
2013-12-05	SAN MATEO	220
2015-03-11	SONOMA	220
2016-01-21	ALAMEDA	220
2014-12-18	SANTA CLARA	220
2016-03-09	CONTRA COSTA	220
2014-12-19	SANTA CLARA	220
2014-10-14	SANTA CLARA	220
2014-07-16	SAN MATEO	220
2016-03-02	SANTA CLARA	220
2014-05-29	CONTRA COSTA	218
2014-11-05	SAN MATEO	218
2015-07-23	SONOMA	210
2014-08-05	SANTA CLARA	210
2014-12-19	SANTA CLARA	210
2015-07-08	SAN MATEO	210
2015-08-07	SANTA CLARA	210
2014-01-10	SANTA CLARA	210
2015-12-01	MARIN	210
2015-10-19	SONOMA	210
2014-01-14	SAN MATEO	210
2014-03-18	MARIN	210
2013-12-05	SAN MATEO	210
2014-01-28	CONTRA COSTA	209
2014-07-16	CONTRA COSTA	209
2015-01-29	CONTRA COSTA	204
2014-01-23	CONTRA COSTA	201
2014-06-04	SANTA CLARA	200.1
2016-05-25	CONTRA COSTA	200
2015-12-16	CONTRA COSTA	200
2015-01-12	SONOMA	200
2015-09-23	SONOMA	200
2014-01-23	CONTRA COSTA	200
2014-11-10	SANTA CLARA	200
2015-07-16	CONTRA COSTA	198
2014-08-12	CONTRA COSTA	195
2014-07-16	CONTRA COSTA	195
2015-03-20	CONTRA COSTA	194
2015-08-17	SAN MATEO	190
2016-08-23	SANTA CLARA	190
2014-11-12	MARIN	190
2016-04-05	NAPA	190
2014-10-03	SANTA CLARA	190
2015-10-07	NAPA	190
2013-12-17	SONOMA	190
2014-11-12	MARIN	190
2014-11-12	SANTA CLARA	190
2015-07-21	MARIN	190
2014-03-03	SANTA CLARA	185
2015-10-21	CONTRA COSTA	185
2014-01-31	SANTA CLARA	182
2015-10-27	CONTRA COSTA	182
2016-03-11	SANTA CLARA	180
2014-04-17	SANTA CLARA	180
2014-12-18	SANTA CLARA	180
2014-10-14	ALAMEDA	180
2014-01-23	SANTA CLARA	180
2015-12-16	CONTRA COSTA	180
2015-05-13	SANTA CLARA	180
2015-08-26	SANTA CLARA	180
2013-12-06	SAN MATEO	180
2015-03-17	NAPA	180
2014-04-28	SONOMA	180
2013-12-13	SONOMA	180
2015-03-18	SONOMA	180
2014-09-03	SAN MATEO	180
2014-02-27	SANTA CLARA	180
2015-12-14	ALAMEDA	180
2015-04-28	CONTRA COSTA	175
2015-10-27	CONTRA COSTA	173
2015-07-07	MARIN	170
2016-02-18	SANTA CLARA	170
2016-04-20	ALAMEDA	170
2015-06-02	MARIN	170
2014-06-10	SANTA CLARA	170
2015-12-03	SANTA CLARA	170
2014-04-30	SANTA CLARA	170
2014-11-13	MARIN	170
2016-03-08	MARIN	170
2014-06-16	SONOMA	170
2014-10-09	NAPA	170
2015-09-23	CONTRA COSTA	170
2016-04-11	SONOMA	170
2014-11-13	MARIN	170
2015-06-22	SANTA CLARA	170
2016-05-25	CONTRA COSTA	170
2015-01-27	CONTRA COSTA	166
2015-03-25	SANTA CLARA	160
2015-12-14	SANTA CLARA	160
2015-01-29	CONTRA COSTA	160
2014-10-03	SANTA CLARA	160
2014-08-19	SAN MATEO	160
2016-02-16	SAN MATEO	160
2014-12-17	SANTA CLARA	160
2014-02-18	SAN MATEO	160
2014-02-06	SANTA CLARA	160
2014-08-14	ALAMEDA	160
2014-12-18	SANTA CLARA	160
2016-06-14	SANTA CLARA	160
2015-08-19	SAN MATEO	160
2015-06-22	SANTA CLARA	160
2014-12-18	SANTA CLARA	160
2015-02-04	CONTRA COSTA	152
2014-03-26	SAN MATEO	151.9
2014-08-12	SANTA CLARA	150
2013-12-09	SANTA CLARA	150
2015-08-17	SAN MATEO	150
2015-07-27	MARIN	150
2015-01-21	ALAMEDA	150
2014-10-07	MARIN	150
2014-09-16	SONOMA	150
2016-03-01	SANTA CLARA	150
2015-12-10	SANTA CLARA	150
2016-08-24	SANTA CLARA	150
2014-10-03	SANTA CLARA	150
2014-07-15	SANTA CLARA	150
2016-02-25	SANTA CLARA	148
2014-02-05	CONTRA COSTA	143
2014-11-25	SANTA CLARA	143
2015-11-19	SANTA CLARA	140
2016-03-02	SANTA CLARA	140
2015-03-02	SANTA CLARA	140
2015-11-11	SAN MATEO	140
2016-02-25	SANTA CLARA	140
2015-01-20	ALAMEDA	140
2016-02-16	MARIN	140
2014-11-06	SANTA CLARA	140
2015-07-14	SAN MATEO	140
2014-09-11	SAN MATEO	140
2014-06-11	ALAMEDA	140
2016-05-25	CONTRA COSTA	140
2016-08-23	SANTA CLARA	140
2014-10-21	CONTRA COSTA	138
2014-10-02	CONTRA COSTA	137
2014-09-29	CONTRA COSTA	137
2014-07-29	CONTRA COSTA	136
2015-04-14	CONTRA COSTA	136
2015-03-20	CONTRA COSTA	134
2016-08-23	SANTA CLARA	133
2015-04-14	CONTRA COSTA	132
2014-03-05	NAPA	130
2014-07-08	MARIN	130
2016-03-03	SANTA CLARA	130
2015-11-23	SANTA CLARA	130
2016-06-22	SONOMA	130
2015-01-12	SONOMA	130
2016-03-09	CONTRA COSTA	130
2016-08-05	ALAMEDA	130
2015-01-02	SONOMA	130
2014-12-17	SAN MATEO	130
2015-11-17	MARIN	130
2014-02-06	ALAMEDA	130
2014-01-22	SANTA CLARA	130
2014-01-20	NAPA	130
2014-11-05	SANTA CLARA	130
2015-06-09	SAN MATEO	130
2014-05-28	SANTA CLARA	127
2014-10-22	CONTRA COSTA	125
2014-03-27	CONTRA COSTA	125
2016-01-19	MARIN	120
2014-12-23	SANTA CLARA	120
2014-12-04	SANTA CLARA	120
2014-05-01	SANTA CLARA	120
2014-10-28	SONOMA	120
2014-09-16	SAN MATEO	120
2014-04-30	SANTA CLARA	120
2016-06-30	SONOMA	120
2014-03-17	SONOMA	120
2014-10-21	SAN MATEO	120
2014-10-03	SANTA CLARA	120
2014-07-01	MARIN	120
2016-02-09	SANTA CLARA	120
2014-08-08	SANTA CLARA	120
2015-02-26	SONOMA	120
2014-11-05	SANTA CLARA	120
2015-12-16	CONTRA COSTA	120
2016-03-03	SANTA CLARA	120
2014-08-20	SAN MATEO	120
2015-04-07	CONTRA COSTA	120
2014-02-11	SANTA CLARA	120
2015-12-03	SANTA CLARA	120
2014-03-13	SANTA CLARA	120
2013-12-04	SANTA CLARA	120
2014-01-22	ALAMEDA	120
2014-09-22	CONTRA COSTA	112
2014-02-10	CONTRA COSTA	111
2015-05-05	MARIN	110
2016-02-09	MARIN	110
2014-05-20	SANTA CLARA	110
2016-05-10	SANTA CLARA	110
2014-10-06	SANTA CLARA	110
2015-06-08	SONOMA	110
2015-02-12	SONOMA	110
2015-12-02	SANTA CLARA	110
2014-12-18	SANTA CLARA	110
2013-12-12	SAN MATEO	110
2014-09-08	NAPA	110
2015-11-10	SANTA CLARA	110
2016-08-29	CONTRA COSTA	110
2015-12-15	ALAMEDA	110
2015-01-06	MARIN	110
2015-11-09	SANTA CLARA	110
2014-08-21	SANTA CLARA	110
2016-04-19	SANTA CLARA	110
2016-07-05	MARIN	110
2015-07-21	SANTA CLARA	110
2014-02-06	ALAMEDA	110
2014-12-18	SANTA CLARA	110
2014-10-03	SANTA CLARA	110
2014-12-22	SANTA CLARA	110
2014-12-18	SANTA CLARA	110
2015-09-29	SANTA CLARA	106
2016-06-09	SANTA CLARA	104
2014-03-03	SANTA CLARA	102
2016-06-20	SONOMA	100
2014-06-11	SANTA CLARA	100
2014-06-17	SANTA CLARA	100
2014-07-18	SANTA CLARA	100
2015-01-15	SANTA CLARA	100
2014-12-04	SANTA CLARA	100
2016-06-20	SONOMA	100
2014-07-21	ALAMEDA	100
2015-07-21	ALAMEDA	100
2016-07-25	ALAMEDA	100
2016-07-18	ALAMEDA	100
2014-07-08	SANTA CLARA	100
2016-07-11	ALAMEDA	100
2014-08-26	SANTA CLARA	100
2015-08-17	SANTA CLARA	100
2015-03-18	SANTA CLARA	100
2014-05-15	SANTA CLARA	100
2014-04-08	SANTA CLARA	100
2014-12-11	SAN MATEO	100
2016-07-19	ALAMEDA	100
2014-03-19	NAPA	100
2014-06-24	NAPA	100
2014-12-16	NAPA	100
2016-03-22	NAPA	100
2014-10-14	SANTA CLARA	100
2015-01-12	SANTA CLARA	100
2014-11-05	SANTA CLARA	100
2014-10-24	SONOMA	100
2014-06-04	NAPA	100
2014-07-22	ALAMEDA	100
2015-07-21	ALAMEDA	100
2016-04-05	MARIN	100
2016-08-16	MARIN	100
2014-09-09	MARIN	100
2014-12-04	SANTA CLARA	100
2014-12-08	SANTA CLARA	100
2014-03-19	NAPA	100
2014-08-05	ALAMEDA	100
2015-07-13	ALAMEDA	100
2016-07-25	ALAMEDA	100
2014-11-03	SANTA CLARA	100
2014-04-02	SANTA CLARA	100
2015-01-12	SONOMA	100
2015-01-13	SAN MATEO	100
2014-12-03	SANTA CLARA	100
2014-02-04	SANTA CLARA	100
2014-08-05	ALAMEDA	100
2014-07-28	ALAMEDA	100
2014-09-04	SANTA CLARA	100
2014-07-15	SANTA CLARA	100
2015-08-24	SANTA CLARA	100
2014-06-10	SANTA CLARA	100
2014-12-02	SANTA CLARA	100
2013-12-18	NAPA	100
2014-03-19	NAPA	100
2015-09-29	NAPA	100
2014-05-02	SANTA CLARA	100
2015-02-23	SANTA CLARA	100
2015-07-21	ALAMEDA	100
2014-07-22	ALAMEDA	100
2014-03-30	MARIN	100
2014-04-23	SANTA CLARA	100
2015-03-11	SANTA CLARA	100
2016-03-28	SANTA CLARA	100
2014-10-28	NAPA	100
2015-03-31	NAPA	100
2015-07-06	ALAMEDA	100
2014-07-28	ALAMEDA	100
2015-08-20	SANTA CLARA	100
2014-12-09	SONOMA	100
2014-11-12	SANTA CLARA	100
2014-12-01	NAPA	100
2014-04-23	MARIN	100
2014-03-17	SANTA CLARA	100
2015-03-11	SANTA CLARA	100
2015-07-06	ALAMEDA	100
2014-08-04	ALAMEDA	100
2014-07-21	ALAMEDA	100
2014-05-07	SANTA CLARA	100
2016-05-25	SANTA CLARA	100
2015-02-22	SONOMA	100
2015-07-21	ALAMEDA	100
2015-12-15	NAPA	100
2014-01-07	CONTRA COSTA	100
2014-07-22	ALAMEDA	100
2014-08-11	ALAMEDA	100
2015-08-17	SANTA CLARA	100
2014-03-27	SANTA CLARA	100
2014-05-13	MARIN	100
2014-06-03	MARIN	100
2016-05-10	MARIN	100
2014-06-09	SANTA CLARA	100
2014-09-04	SANTA CLARA	100
2014-12-03	SANTA CLARA	100
2015-01-12	SANTA CLARA	100
2014-11-12	SANTA CLARA	100
2015-01-07	SANTA CLARA	100
2014-05-16	SANTA CLARA	100
2014-10-10	SANTA CLARA	100
2014-08-06	SANTA CLARA	100
2014-07-21	ALAMEDA	100
2015-07-21	ALAMEDA	100
2015-03-31	NAPA	100
2015-07-07	ALAMEDA	100
2015-06-17	CONTRA COSTA	100
2014-07-15	SANTA CLARA	100
2014-01-10	SANTA CLARA	100
2016-03-10	SANTA CLARA	100
2014-01-21	SANTA CLARA	100
2014-03-19	SANTA CLARA	100
2015-02-05	MARIN	100
2014-01-21	SANTA CLARA	100
2015-09-22	NAPA	100
2015-03-31	NAPA	100
2016-07-18	SANTA CLARA	100
2014-07-22	ALAMEDA	100
2014-01-07	MARIN	100
2014-02-18	MARIN	100
2014-04-23	SANTA CLARA	100
2014-09-10	SANTA CLARA	100
2014-06-17	SANTA CLARA	100
2014-09-10	SANTA CLARA	100
2014-09-11	SANTA CLARA	100
2014-01-16	SANTA CLARA	100
2015-03-31	NAPA	100
2015-05-06	NAPA	100
2016-07-25	ALAMEDA	100
2014-07-22	ALAMEDA	100
2015-07-14	ALAMEDA	100
2015-07-21	ALAMEDA	100
2015-02-22	SONOMA	100
2015-02-27	SONOMA	100
2013-12-16	SONOMA	100
2016-06-06	SONOMA	100
2015-08-05	NAPA	100
2016-07-18	MARIN	100
2015-06-15	SONOMA	100
2016-07-18	ALAMEDA	100
2014-08-04	ALAMEDA	100
2015-08-20	SANTA CLARA	100
2014-10-29	NAPA	100
2014-12-16	NAPA	100
2015-12-22	NAPA	100
2015-03-03	SANTA CLARA	100
2014-04-30	SONOMA	100
2016-07-19	ALAMEDA	100
2014-11-12	SANTA CLARA	100
2015-07-14	NAPA	100
2015-08-04	MARIN	100
2014-12-03	SANTA CLARA	100
2015-01-15	SANTA CLARA	100
2016-06-14	SANTA CLARA	100
2014-07-28	ALAMEDA	100
2015-07-13	ALAMEDA	100
2016-07-11	ALAMEDA	100
2014-07-22	ALAMEDA	100
2014-12-11	SAN MATEO	100
2014-08-05	ALAMEDA	100
2015-07-20	ALAMEDA	100
2015-07-20	ALAMEDA	100
2014-08-26	SANTA CLARA	100
2014-09-29	SONOMA	100
2014-03-27	SANTA CLARA	100
2014-08-14	SAN MATEO	100
2014-09-23	NAPA	100
2015-06-23	NAPA	100
2014-09-23	NAPA	100
2015-08-19	SANTA CLARA	100
2016-07-19	ALAMEDA	100
2014-04-03	SANTA CLARA	100
2016-03-22	SANTA CLARA	100
2015-02-10	SONOMA	100
2016-07-19	ALAMEDA	100
2013-12-03	MARIN	100
2016-06-07	MARIN	100
2015-05-14	SANTA CLARA	100
2013-12-10	SANTA CLARA	100
2015-04-13	SANTA CLARA	100
2015-03-04	SANTA CLARA	100
2016-07-18	ALAMEDA	100
2015-06-15	SONOMA	100
2013-12-18	NAPA	100
2016-07-25	ALAMEDA	100
2014-01-07	CONTRA COSTA	100
2014-10-28	SONOMA	100
2016-07-11	MARIN	100
2014-02-11	SANTA CLARA	100
2014-03-27	SANTA CLARA	100
2014-04-30	SONOMA	100
2014-05-14	MARIN	100
2016-07-18	ALAMEDA	100
2015-07-06	ALAMEDA	100
2015-07-28	ALAMEDA	100
2015-08-24	SANTA CLARA	100
2014-08-26	SANTA CLARA	100
2014-02-11	SANTA CLARA	100
2015-03-18	NAPA	100
2014-06-05	SANTA CLARA	100
2014-06-24	NAPA	100
2015-06-23	NAPA	100
2014-08-15	SANTA CLARA	100
2015-05-14	SANTA CLARA	100
2015-04-27	MARIN	100
2015-04-08	SAN MATEO	100
2016-07-19	ALAMEDA	100
2014-09-09	MARIN	100
2015-07-06	SONOMA	100
2015-01-12	SANTA CLARA	100
2015-04-09	SANTA CLARA	100
2014-04-09	SANTA CLARA	100
2015-03-04	SANTA CLARA	100
2015-01-06	SANTA CLARA	100
2015-04-08	SANTA CLARA	100
2014-08-18	ALAMEDA	100
2016-07-19	ALAMEDA	100
2015-12-28	SONOMA	100
2015-08-19	SANTA CLARA	100
2014-03-11	SONOMA	100
2014-11-12	SANTA CLARA	100
2015-03-04	NAPA	100
2015-01-02	SONOMA	100
2014-08-18	SANTA CLARA	100
2013-12-04	SANTA CLARA	100
2015-07-20	ALAMEDA	100
2014-08-04	ALAMEDA	100
2016-07-18	ALAMEDA	100
2016-07-11	ALAMEDA	100
2016-07-11	ALAMEDA	100
2015-07-13	ALAMEDA	100
2016-07-11	ALAMEDA	100
2014-08-27	SANTA CLARA	100
2014-01-07	SANTA CLARA	100
2014-02-06	SANTA CLARA	100
2015-03-17	NAPA	100
2016-06-21	NAPA	100
2016-03-22	NAPA	100
2014-04-15	SANTA CLARA	100
2015-07-21	ALAMEDA	100
2015-07-21	ALAMEDA	100
2015-07-21	ALAMEDA	100
2014-02-10	MARIN	100
2014-08-14	SANTA CLARA	100
2014-01-07	CONTRA COSTA	100
2014-02-25	SAN MATEO	100
2016-03-09	CONTRA COSTA	97
2016-02-25	SANTA CLARA	93.1
2014-02-27	SANTA CLARA	89
2015-08-26	SANTA CLARA	89
2016-03-09	CONTRA COSTA	88
2014-03-20	ALAMEDA	86.8
2015-09-08	SAN MATEO	86
2015-08-13	SANTA CLARA	85
2014-05-19	SAN MATEO	82
2014-01-31	SANTA CLARA	81.8
2014-10-02	CONTRA COSTA	80.8
2016-05-16	SONOMA	80
2014-05-07	CONTRA COSTA	78.9
2014-03-20	ALAMEDA	78.7
2015-09-17	CONTRA COSTA	78.1
2015-09-23	CONTRA COSTA	74
2015-12-15	ALAMEDA	73
2014-01-10	SAN MATEO	73
2015-05-19	SAN MATEO	71
2013-12-30	SANTA CLARA	70.9
2015-10-05	CONTRA COSTA	70
2014-10-01	CONTRA COSTA	69.6
2014-09-22	CONTRA COSTA	68.2
2016-01-20	NO COUNTY FOUND	68
2015-01-27	ALAMEDA	67
2015-01-22	MARIN	66.86
2014-05-22	SANTA CLARA	66
2016-08-24	SANTA CLARA	66
2015-12-21	CONTRA COSTA	65
2015-06-23	NAPA	65
2014-01-27	SANTA CLARA	64.5
2016-01-20	NO COUNTY FOUND	64
2014-07-14	SANTA CLARA	63
2015-06-18	ALAMEDA	63
2015-03-06	SANTA CLARA	63
2014-01-27	SANTA CLARA	62.2
2015-01-27	ALAMEDA	61
2016-02-25	SANTA CLARA	60.9
2015-05-12	CONTRA COSTA	60.5
2016-05-25	CONTRA COSTA	60
2014-08-20	SAN MATEO	59
2015-03-17	SAN MATEO	59
2016-02-25	SANTA CLARA	56.1
2014-02-06	ALAMEDA	56
2016-08-23	SANTA CLARA	55
2014-07-14	SANTA CLARA	55
2016-01-20	NO COUNTY FOUND	54
2015-10-22	SANTA CLARA	51
2015-09-10	CONTRA COSTA	50.4
2014-02-04	SANTA CLARA	50
2014-07-18	SANTA CLARA	50
2015-06-03	SANTA CLARA	49.77
2015-05-14	ALAMEDA	48.99
2014-09-29	CONTRA COSTA	48.6
2014-03-03	SANTA CLARA	46
2014-05-22	SANTA CLARA	46
2016-01-20	NO COUNTY FOUND	46
2015-04-09	SANTA CLARA	45
2013-12-04	SANTA CLARA	44.7
2015-02-24	SANTA CLARA	42
2016-03-03	SANTA CLARA	41
2014-09-22	CONTRA COSTA	40.4
2016-03-09	CONTRA COSTA	40
2015-08-18	SAN MATEO	40
2015-05-07	CONTRA COSTA	39.5
2015-06-04	SANTA CLARA	39.2
2014-10-29	CONTRA COSTA	38.9
2015-08-19	SAN MATEO	38
2014-12-02	SANTA CLARA	37.22
2014-09-09	SANTA CLARA	36.33
2015-08-27	CONTRA COSTA	36.1
2016-03-02	SANTA CLARA	36
2015-08-27	CONTRA COSTA	36
2014-03-03	SANTA CLARA	36
2015-10-05	CONTRA COSTA	35.6
2014-05-19	SANTA CLARA	35
2015-08-13	SANTA CLARA	33
2016-03-04	SANTA CLARA	33
2015-03-05	SANTA CLARA	31.55
2014-09-09	SANTA CLARA	31.02
2014-09-08	SANTA CLARA	31
2015-07-21	SAN MATEO	30
2014-11-25	SANTA CLARA	30
2015-11-11	ALAMEDA	25
2014-08-20	SAN MATEO	25
2016-02-25	SANTA CLARA	23.9
2015-02-24	ALAMEDA	23.29
2013-12-30	SANTA CLARA	22.3
2013-12-30	SANTA CLARA	21.5
2015-06-04	SANTA CLARA	20.9
2013-12-04	SAN MATEO	19.3
2015-02-17	MARIN	18.32
2014-05-05	SAN MATEO	18.11
2014-06-04	SANTA CLARA	18.06
2014-11-25	SANTA CLARA	17.7
2015-02-24	SANTA CLARA	16.9
2015-07-16	MARIN	14.65
2014-09-08	SAN MATEO	14.32
2014-11-04	SAN MATEO	14.16
2014-06-09	SAN MATEO	14.08
2014-12-04	SAN MATEO	13.73
2015-04-07	SAN MATEO	13.31
2016-06-10	SANTA CLARA	12.9
2015-08-18	SAN MATEO	12.59
2014-09-08	SANTA CLARA	12
2015-02-02	SAN MATEO	11.92
2014-08-18	SAN MATEO	11.76
2015-06-01	SAN MATEO	11.45
2014-09-08	SANTA CLARA	11.2
2016-02-25	SANTA CLARA	10.8
2015-02-24	SANTA CLARA	10.7
2015-02-24	SANTA CLARA	10.5
2013-12-04	SAN MATEO	10.3
2015-05-18	SANTA CLARA	10
2014-12-04	SAN MATEO	9.794
2014-09-08	SAN MATEO	9.48
2014-02-04	SAN MATEO	8.644
2014-06-09	SAN MATEO	8.404
2014-03-03	SANTA CLARA	7.4
2015-01-13	SAN MATEO	7.087
2015-06-01	SAN MATEO	6.856
2014-05-12	MARIN	6.799
2014-03-03	SANTA CLARA	6.73
2015-06-03	SANTA CLARA	6.71
2016-08-23	SANTA CLARA	6.16
2015-03-04	SAN MATEO	5.278
2015-03-17	MARIN	5.251
2015-04-14	MARIN	5.103
2014-12-09	MARIN	5.098
2015-05-19	MARIN	5.028
2014-11-25	SANTA CLARA	4.89
2014-03-03	SANTA CLARA	4.58
2015-08-10	ALAMEDA	4.329
2015-07-06	SAN MATEO	4.172
2014-12-04	SAN MATEO	3.972
2015-06-16	MARIN	3.926
2014-05-28	SANTA CLARA	3.51
2014-09-08	SANTA CLARA	3.18
2014-12-02	SANTA CLARA	3.167
2014-10-21	MARIN	3.147
2013-12-04	SAN MATEO	2.6
2014-09-23	MARIN	1.977
2015-08-26	SANTA CLARA	1.83
2014-07-15	MARIN	1.715
2014-05-28	SANTA CLARA	1.71
2014-11-18	MARIN	1.675
2014-01-21	MARIN	1.611
2015-08-10	MARIN	1.595
2015-06-04	SANTA CLARA	1.54
2014-05-28	SANTA CLARA	1.53
2014-08-12	MARIN	1.152
2014-11-18	MARIN	1.046
2014-05-12	ALAMEDA	0.802
2015-06-01	SAN MATEO	0.673
2014-11-18	MARIN	0.34
2014-09-08	SAN MATEO	0.328
2015-03-24	MARIN	0.235
2015-09-22	MARIN	0.184
2014-05-19	SONOMA	0.16
2013-12-10	MARIN	0.15
2014-11-18	MARIN	0.111
2014-03-11	MARIN	0.103
2015-03-04	SAN MATEO	0.071
2015-11-03	MARIN	0
2014-06-17	MARIN	0
2016-02-03	SAN MATEO	0
2015-08-10	SAN MATEO	0
2016-06-20	SANTA CLARA	0
2014-03-17	SONOMA	0
2014-02-12	SONOMA	0
2015-06-09	SAN MATEO	0
2016-04-05	NAPA	0
2014-03-17	SONOMA	0
2016-03-29	SONOMA	0
2015-11-23	ALAMEDA	0
2015-09-02	SANTA CLARA	0
2014-12-18	SANTA CLARA	0
2016-08-23	SANTA CLARA	0
2014-07-14	SANTA CLARA	0
2015-08-12	SANTA CLARA	0
2014-11-12	MARIN	0
2016-05-09	ALAMEDA	0
2013-12-19	SANTA CLARA	0
2015-01-28	ALAMEDA	0
2013-12-05	SAN MATEO	0
2016-03-04	SANTA CLARA	0
2015-08-18	SAN MATEO	0
2016-01-07	CONTRA COSTA	0
2015-08-28	SAN MATEO	0
2014-11-11	MARIN	0
2015-01-27	ALAMEDA	0
2014-01-14	SAN MATEO	0
2014-03-31	CONTRA COSTA	0
2014-11-12	MARIN	0
2013-12-05	SAN MATEO	0
2016-06-21	SANTA CLARA	0
2014-05-20	SAN MATEO	0
2016-05-03	ALAMEDA	0
2014-12-03	NAPA	0
2014-09-11	ALAMEDA	0
2014-11-11	MARIN	0
2014-02-27	SANTA CLARA	0
2015-08-12	SANTA CLARA	0
2014-05-01	CONTRA COSTA	0
2015-07-14	CONTRA COSTA	0
2014-12-19	SANTA CLARA	0
2014-12-19	SANTA CLARA	0
2015-03-09	SANTA CLARA	0
2014-03-20	SONOMA	0
2014-01-21	ALAMEDA	0
2014-01-22	SANTA CLARA	0
2014-10-03	SANTA CLARA	0
2013-12-19	SANTA CLARA	0
2015-08-12	SANTA CLARA	0
2015-03-06	SANTA CLARA	0
2016-03-02	SANTA CLARA	0
2014-05-08	CONTRA COSTA	0
2015-07-16	CONTRA COSTA	0
2015-10-22	CONTRA COSTA	0
2014-02-11	CONTRA COSTA	0
2014-10-03	SANTA CLARA	0
2014-01-22	SANTA CLARA	0
2014-07-29	SANTA CLARA	0
2015-12-02	SANTA CLARA	0
2016-02-09	ALAMEDA	0
2015-06-04	MARIN	0
2015-12-09	SAN MATEO	0
2016-02-03	SAN MATEO	0
2014-04-15	MARIN	0
2016-04-19	SANTA CLARA	0
2015-09-22	MARIN	0
2016-01-12	MARIN	0
2016-03-22	MARIN	0
2015-05-18	NAPA	0
2014-01-22	SANTA CLARA	0
2015-06-18	SANTA CLARA	0
2015-06-18	ALAMEDA	0
2014-07-18	SANTA CLARA	0
2015-08-19	SAN MATEO	0
2014-01-06	ALAMEDA	0
2014-12-17	ALAMEDA	0
2015-08-19	SAN MATEO	0
2015-09-15	SANTA CLARA	0
2015-09-14	SANTA CLARA	0
2016-02-24	NAPA	0
[truncated: 609 more rows]
